# Supplementary material for: RNA sequencing of Sleeping Beauty transposon-induced tumors detects transposon-RNA fusions in forward genetic cancer screens
Source: HighWire-hosted journal article supplement (doi:10.1101/gr.188649.114), 2015-11-09
Supplement: Supplemental_Figure_Legend.docx [file Supplemental_Figure_Legend.docx]

**Supplementary Figure S1 Transcription near CIS insertions.**

Image showing FPKM values for A) Mycl1 and B) Myc for each of the 14 *SB* OS tumors. An exon map of the gene region is shown indicating the direction of transcription below the FPKM bar plots. For each tumor, a histogram of the raw number of reads observed within each 100 bp window is shown. The locations of LM-PCR identified insertions are shown with triangles. Blue triangles represent + orientation insertions that can activate transcription on the + strand while green triangles represent - orientation insertions that can activate transcription on the – strand. RNA fusions identified in the RNA-seq data are described in the figure legend.

**Supplementary Figure S2 RT-PCR amplification and sequencing of junction fragments**

Agarose gel showing PCR amplified junction fragment generated using T2/ONC primer and genome specific primer near A) Runx1 in tumor O245 B) Tax1bp1 in tumor O245 C) Gsk3b in tumor O73 D) Fars2 in tumor O31 E) Smad5 in tumor O31 F) Myc in tumor O374-1 and G) Bicc1 in tumor O245. The sanger sequencing trace for the amplified product is shown to the right of the agarose gel image. The transposon-derived sequence is underlined in black, while the genome-derived sequence is shown in blue.

**Supplementary Figure S3**

Plot of FPKM values and genome region showing fusions and insertions as described in Figure 1 for the Runx1 genomic region for each of the 14 tumors.

**Supplementary Figure S4**

Plot of FPKM values and genome region showing fusions and insertions as described in Figure 1 for the Tax1bp1 genomic region for each of the 14 tumors.

**Supplementary Figure S5**

Plot of FPKM values and genome region showing fusions and insertions as described in Figure 1 for the Gsk3b genomic region for each of the 14 tumors.

**Supplementary Figure S6**

Plot of FPKM values and genome region showing fusions and insertions as described in Figure 1 for the Runx1 genomic region for each of the 14 tumors.

**Supplementary Figure S7**

Plot of FPKM values and genome region showing fusions and insertions as described in Figure 1 for the Fars2 genomic region for each of the 14 tumors.

**Supplementary Figure S8**

Plot of FPKM values and genome region showing fusions and insertions as described in Figure 1 for the Smad5 genomic region for each of the 14 tumors.

**Supplementary Figure S9**

Plot of FPKM values and genome region showing fusions and insertions as described in Figure 1 for the Myc genomic region for each of the 14 tumors.

**Supplementary Figure S10**

Plot of FPKM values and genome region showing fusions and insertions as described in Figure 1 for the Bicc1 genomic region for each of the 14 tumors.
