# Supplementary material for: RNA sequencing of Sleeping Beauty transposon-induced tumors detects transposon-RNA fusions in forward genetic cancer screens
Source: HighWire-hosted journal article supplement (doi:10.1101/gr.188649.114), 2015-11-09
Supplement: Supplemental_Tables.xlsx [file Supplemental_Tables.xlsx]

## Sheet: S1-FUSIONS
Supplemental Table 2
chr	start	stop	tumor	sb	tot	other_loc	gene	lmpcr_support	clonal	shear_support	total reads	CPM
chr1	161214750	161215050	O109	14	229	chrSB:450-650	Rfwd2	YES	NO	NULL	62	0.225806
chr1	161218950	161219250	O109	27	399	chrSB:450-650	Rfwd2	YES	NO	NULL	62	0.435484
chr9	75377250	75377550	O109	6	464	chrSB:450-650	Tmod3	YES	NO	NULL	62	0.0967742
chr1	41893950	41894250	O109	17	180	chrSB:900-1100	Gm9915	NO	NO	NULL	62	0.274194
chr1	41952450	41952750	O109	3	158	chrSB:900-1100	Gm9915	NO	NO	NULL	62	0.0483871
chr1	41976750	41977050	O109	9	253	chrSB:900-1100	Gm9915	NO	NO	NULL	62	0.145161
chr15	18139650	18139950	O109	4	17	chrSB:900-1100	U6	NO	NO	NULL	62	0.0645161
chr15	18140850	18141150	O109	3	27	chrSB:900-1100	U6	NO	NO	NULL	62	0.0483871
chr15	18141150	18141450	O109	3	71	chrSB:900-1100	U6	NO	NO	NULL	62	0.0483871
chr4	53261550	53261850	O109	3	21	chrSB:900-1100	RP23-204P1.1	NO	NO	NULL	62	0.0483871
chr4	53275950	53276250	O109	35	209	chrSB:900-1100	RP23-204P1.2	NO	NO	NULL	62	0.564516
chr7	120529350	120529650	O109	707	4669	chrSB:900-1100	Pth	YES	NO	NULL	62	11.4032
chr7	120529650	120529950	O109	37	1250	chrSB:900-1100	Pth	YES	NO	NULL	62	0.596774
chr7	122805750	122806050	O109	12	187	chrSB:900-1100	Sox6	YES	NO	NULL	62	0.193548
chr1	107453850	107454150	O109	3	71	chrSB:1400-1600	Pign	NO	NO	NULL	62	0.0483871
chr1	107560950	107561250	O109	3	94	chrSB:1400-1600	2310035C23Rik	NO	NO	NULL	62	0.0483871
chr1	153418350	153418650	O109	3	95	chrSB:1400-1600	Fam129a	YES	NO	NULL	62	0.0483871
chr1	162836550	162836850	O109	10	142	chrSB:1400-1600	Rc3h1	NO	NO	NULL	62	0.16129
chr11	59120250	59120550	O109	3	63	chrSB:1400-1600	Wnt9a	NO	NO	NULL	62	0.0483871
chr13	85377750	85378050	O109	3	120	chrSB:1400-1600	Rasa1	NO	NO	NULL	62	0.0483871
chr15	103196550	103196850	O109	4	149	chrSB:1400-1600	Itga5	NO	NO	NULL	62	0.0645161
chr16	56089350	56089650	O109	3	46	chrSB:1400-1600	Senp7	NO	NO	NULL	62	0.0483871
chr19	16207650	16207950	O109	3	197	chrSB:1400-1600	Gnaq	NO	NO	NULL	62	0.0483871
chr19	40345650	40345950	O109	3	96	chrSB:1400-1600	Pdlim1	NO	NO	NULL	62	0.0483871
chr3	148528350	148528650	O109	3	67	chrSB:1400-1600	Lphn2	NO	NO	NULL	62	0.0483871
chr4	53156550	53156850	O109	13	132	chrSB:1400-1600	Abca1	YES	NO	NULL	62	0.209677
chr4	53156850	53157150	O109	14	277	chrSB:1400-1600	Abca1	YES	NO	NULL	62	0.225806
chr6	29104950	29105250	O109	4	185	chrSB:1400-1600	Rbm28	NO	NO	NULL	62	0.0645161
chr16	4173750	4174050	O112	3	16	chrSB:0-200	Crebbp	NO	NO	NULL	242	0.0123967
chr7	88366650	88366950	O112	5	42	chrSB:0-200	Pde8a	YES	NO	NULL	242	0.0206612
chr9	110453850	110454150	O112	3	205	chrSB:0-200	Setd2	YES	NO	NULL	242	0.0123967
chr9	110455350	110455650	O112	7	156	chrSB:0-200	Setd2	YES	NO	NULL	242	0.0289256
chr9	110455650	110455950	O112	27	211	chrSB:0-200	Setd2	YES	NO	NULL	242	0.11157
chr9	110458650	110458950	O112	49	233	chrSB:0-200	Setd2	YES	YES	NULL	242	0.202479
chr10	12484950	12485250	O112	4	30	chrSB:450-650	Utrn	YES	NO	NULL	242	0.0165289
chr10	12581250	12581550	O112	5	169	chrSB:450-650	Utrn	NO	NO	NULL	242	0.0206612
chr13	49783950	49784250	O112	3	256	chrSB:450-650	Iars	YES	NO	NULL	242	0.0123967
chr13	49785750	49786050	O112	34	283	chrSB:450-650	Iars	YES	NO	NULL	242	0.140496
chr13	49786650	49786950	O112	26	247	chrSB:450-650	Iars	YES	NO	NULL	242	0.107438
chr13	75862350	75862650	O112	3	124	chrSB:450-650	Ell2	NO	NO	NULL	242	0.0123967
chr2	121814550	121814850	O112	16	90	chrSB:450-650	Ctdspl2	YES	NO	NULL	242	0.0661157
chr2	121819050	121819350	O112	8	109	chrSB:450-650	Ctdspl2	YES	NO	NULL	242	0.0330579
chr5	24386250	24386550	O112	25	322	chrSB:450-650	Prkag2	YES	NO	NULL	242	0.103306
chr5	24386550	24386850	O112	17	203	chrSB:450-650	Prkag2	YES	NO	NULL	242	0.0702479
chr5	24394650	24394950	O112	36	220	chrSB:450-650	Prkag2	YES	NO	NULL	242	0.14876
chr5	24394950	24395250	O112	3	230	chrSB:450-650	Prkag2	YES	NO	NULL	242	0.0123967
chr8	90682050	90682350	O112	32	458	chrSB:450-650	Heatr3	YES	NO	NULL	242	0.132231
chr8	90685650	90685950	O112	14	687	chrSB:450-650	Heatr3	YES	NO	NULL	242	0.0578512
chr9	110455350	110455650	O112	12	156	chrSB:450-650	Setd2	YES	NO	NULL	242	0.0495868
chr9	110455650	110455950	O112	3	211	chrSB:450-650	Setd2	YES	NO	NULL	242	0.0123967
chr9	110463450	110463750	O112	20	1192	chrSB:450-650	Setd2	YES	NO	NULL	242	0.0826446
chr1	33047550	33047850	O112	3	3	chrSB:900-1100	AC171813.1	NO	NO	NULL	242	0.0123967
chr1	64368750	64369050	O112	3	53	chrSB:900-1100	RP23-45M23.2	NO	NO	NULL	242	0.0123967
chr1	64374150	64374450	O112	4	8	chrSB:900-1100	RP23-45M23.2	NO	NO	NULL	242	0.0165289
chr1	64457550	64457850	O112	501	8109	chrSB:900-1100	Creb1	YES	NO	NULL	242	2.07025
chr1	64467150	64467450	O112	46	2786	chrSB:900-1100	Creb1	YES	NO	NULL	242	0.190083
chr1	64480650	64480950	O112	307	2387	chrSB:900-1100	Creb1	YES	NO	NULL	242	1.2686
chr1	64487250	64487550	O112	5	37	chrSB:900-1100	Creb1	YES	NO	NULL	242	0.0206612
chr1	121379850	121380150	O112	94	5184	chrSB:900-1100	Ralb	YES	NO	NULL	242	0.38843
chr1	137038350	137038650	O112	4	78	chrSB:900-1100	Ptpn7	NO	NO	NULL	242	0.0165289
chr1	139993350	139993650	O112	3	122	chrSB:900-1100	Ptprc	NO	NO	NULL	242	0.0123967
chr1	147913350	147913650	O112	9	24	chrSB:900-1100	Fam5c	NO	NO	NULL	242	0.0371901
chr1	154920750	154921050	O112	3	9	chrSB:900-1100	Nmnat2	YES	NO	NULL	242	0.0123967
chr1	172696050	172696350	O112	3	157	chrSB:900-1100	Atf6	NO	NO	NULL	242	0.0123967
chr1	172699350	172699650	O112	3	171	chrSB:900-1100	Atf6	NO	NO	NULL	242	0.0123967
chr1	181471050	181471350	O112	341	1998	chrSB:900-1100	Tfb2m	YES	NO	NULL	242	1.40909
chr1	181509450	181509750	O112	8	392	chrSB:900-1100	Cnst	YES	NO	NULL	242	0.0330579
chr10	5914350	5914650	O112	3	85	chrSB:900-1100	Rmnd1	NO	NO	NULL	242	0.0123967
chr10	12467550	12467850	O112	30	193	chrSB:900-1100	Utrn	YES	NO	NULL	242	0.123967
chr10	12469650	12469950	O112	10	55	chrSB:900-1100	Utrn	YES	NO	NULL	242	0.0413223
chr10	24655350	24655650	O112	4	124	chrSB:900-1100	Arg1	NO	NO	NULL	242	0.0165289
chr10	58024650	58024950	O112	6	116	chrSB:900-1100	Ccdc138	NO	NO	NULL	242	0.0247934
chr10	58446450	58446750	O112	4	35	chrSB:900-1100	Sh3rf3	NO	NO	NULL	242	0.0165289
chr10	58446750	58447050	O112	32	194	chrSB:900-1100	Sh3rf3	NO	NO	NULL	242	0.132231
chr10	66576750	66577050	O112	3	20	chrSB:900-1100	Reep3	YES	NO	NULL	242	0.0123967
chr10	66620550	66620850	O112	20	90	chrSB:900-1100	Jmjd1c	YES	YES	NULL	242	0.0826446
chr10	97281450	97281750	O112	3	65	chrSB:900-1100	Gm10754	NO	NO	NULL	242	0.0123967
chr10	104961150	104961450	O112	117	2439	chrSB:900-1100	Tmtc2	YES	NO	NULL	242	0.483471
chr10	104961450	104961750	O112	379	7245	chrSB:900-1100	Tmtc2	YES	NO	NULL	242	1.56612
chr10	104975550	104975850	O112	9	117	chrSB:900-1100	Tmtc2	YES	NO	NULL	242	0.0371901
chr10	104987250	104987550	O112	8	758	chrSB:900-1100	Tmtc2	YES	NO	NULL	242	0.0330579
chr10	110839350	110839650	O112	7	19	chrSB:900-1100	Nap1l1	NO	NO	NULL	242	0.0289256
chr11	11531850	11532150	O112	4	6	chrSB:900-1100	RP23-3J16.2	NO	NO	NULL	242	0.0165289
chr11	19904250	19904550	O112	3	28	chrSB:900-1100	Spred2	NO	NO	NULL	242	0.0123967
chr11	99082950	99083250	O112	566	5535	chrSB:900-1100	Smarce1	NO	NO	NULL	242	2.33884
chr11	99083250	99083550	O112	135	8281	chrSB:900-1100	Smarce1	NO	NO	NULL	242	0.557851
chr11	99099750	99100050	O112	54	426	chrSB:900-1100	Krt222	NO	NO	NULL	242	0.22314
chr11	99104250	99104550	O112	31	1601	chrSB:900-1100	Krt222	NO	NO	NULL	242	0.128099
chr11	99104850	99105150	O112	230	3263	chrSB:900-1100	Krt222	NO	NO	NULL	242	0.950413
chr11	99105150	99105450	O112	129	5927	chrSB:900-1100	Krt222	NO	NO	NULL	242	0.533058
chr11	99107550	99107850	O112	71	3794	chrSB:900-1100	Krt222	NO	NO	NULL	242	0.293388
chr11	99109050	99109350	O112	28	1534	chrSB:900-1100	Krt222	NO	NO	NULL	242	0.115702
chr11	99110550	99110850	O112	128	3436	chrSB:900-1100	Krt222	NO	NO	NULL	242	0.528926
chr11	99141450	99141750	O112	35	920	chrSB:900-1100	Krt24	NO	NO	NULL	242	0.144628
chr11	99165750	99166050	O112	14	904	chrSB:900-1100	RP23-255N16.4	NO	NO	NULL	242	0.0578512
chr11	100697250	100697550	O112	3	27	chrSB:900-1100	Stat5b	NO	NO	NULL	242	0.0123967
chr11	102941550	102941850	O112	16	538	chrSB:900-1100	Plcd3	NO	NO	NULL	242	0.0661157
chr11	102941850	102942150	O112	11	279	chrSB:900-1100	Plcd3	NO	NO	NULL	242	0.0454545
chr11	102972750	102973050	O112	30	1189	chrSB:900-1100	Acbd4	NO	NO	NULL	242	0.123967
chr11	102978750	102979050	O112	39	2087	chrSB:900-1100	Hexim1	NO	NO	NULL	242	0.161157
chr11	113757750	113758050	O112	3	23	chrSB:900-1100	Sdk2	NO	NO	NULL	242	0.0123967
chr11	121736550	121736850	O112	4	16	chrSB:900-1100	RP23-342H16.5	NO	NO	NULL	242	0.0165289
chr12	75815250	75815550	O112	4	6	chrSB:900-1100	Kcnh5	NO	NO	NULL	242	0.0165289
chr12	79548150	79548450	O112	4	314	chrSB:900-1100	Gphn	NO	NO	NULL	242	0.0165289
chr12	105276150	105276450	O112	3851	106186	chrSB:900-1100	Serpina12	YES	NO	NULL	242	15.9132
chr12	105276450	105276750	O112	2027	25834	chrSB:900-1100	Serpina12	YES	NO	NULL	242	8.37603
chr12	109307850	109308150	O112	23	463	chrSB:900-1100	Setd3	YES	NO	NULL	242	0.0950413
chr12	109329150	109329450	O112	6	333	chrSB:900-1100	Setd3	YES	NO	NULL	242	0.0247934
chr12	109349550	109349850	O112	5	448	chrSB:900-1100	Setd3	YES	NO	NULL	242	0.0206612
chr13	9750150	9750450	O112	15	350	chrSB:900-1100	Zmynd11	YES	NO	NULL	242	0.0619835
chr13	9796650	9796950	O112	124	708	chrSB:900-1100	Zmynd11	YES	NO	NULL	242	0.512397
chr13	26448150	26448450	O112	21	69	chrSB:900-1100	RP23-125J3.1	NO	YES	NULL	242	0.0867769
chr13	49788150	49788450	O112	45	429	chrSB:900-1100	Iars	YES	NO	NULL	242	0.18595
chr13	49788450	49788750	O112	171	995	chrSB:900-1100	Iars	YES	NO	NULL	242	0.706612
chr13	60457950	60458250	O112	12	398	chrSB:900-1100	Gm10779	NO	NO	NULL	242	0.0495868
chr13	60459150	60459450	O112	12	282	chrSB:900-1100	Gm10779	NO	NO	NULL	242	0.0495868
chr13	60460350	60460650	O112	49	407	chrSB:900-1100	Gm10779	NO	NO	NULL	242	0.202479
chr13	60466650	60466950	O112	5	232	chrSB:900-1100	Gm10779	NO	NO	NULL	242	0.0206612
chr13	60466950	60467250	O112	1240	4763	chrSB:900-1100	Gm10779	NO	YES	NULL	242	5.12397
chr13	60470550	60470850	O112	10	811	chrSB:900-1100	Gm10779	NO	NO	NULL	242	0.0413223
chr13	60483450	60483750	O112	354	4747	chrSB:900-1100	Gm10779	NO	NO	NULL	242	1.46281
chr14	26345550	26345850	O112	3	51	chrSB:900-1100	Zmiz1	YES	NO	NULL	242	0.0123967
chr14	26356050	26356350	O112	15	74	chrSB:900-1100	Zmiz1	YES	YES	NULL	242	0.0619835
chr14	26391450	26391750	O112	10	155	chrSB:900-1100	Zmiz1	YES	NO	NULL	242	0.0413223
chr14	28009350	28009650	O112	10	73	chrSB:900-1100	Arhgef3	NO	NO	NULL	242	0.0413223
chr14	30737550	30737850	O112	8	12	chrSB:900-1100	Gm10245	NO	NO	NULL	242	0.0330579
chr14	50317050	50317350	O112	6	62	chrSB:900-1100	3632451O06Rik	NO	NO	NULL	242	0.0247934
chr14	53101350	53101650	O112	9	24	chrSB:900-1100	Olfr1507	NO	NO	NULL	242	0.0371901
chr14	64909650	64909950	O112	3	86	chrSB:900-1100	Msra	NO	NO	NULL	242	0.0123967
chr14	91477950	91478250	O112	5	12	chrSB:900-1100	SNORA17	NO	NO	NULL	242	0.0206612
chr14	120778350	120778650	O112	119	945	chrSB:900-1100	Mbnl2	YES	NO	NULL	242	0.491736
chr14	120784350	120784650	O112	7	644	chrSB:900-1100	Mbnl2	YES	NO	NULL	242	0.0289256
chr15	3063150	3063450	O112	4	20	chrSB:900-1100	Sepp1	NO	NO	NULL	242	0.0165289
chr15	20278050	20278350	O112	7	18	chrSB:900-1100	SNORA17	NO	NO	NULL	242	0.0289256
chr15	29671350	29671650	O112	5	8	chrSB:900-1100	SNORA17	NO	NO	NULL	242	0.0206612
chr16	15510450	15510750	O112	4	25	chrSB:900-1100	Ube2v2	NO	NO	NULL	242	0.0165289
chr16	17106750	17107050	O112	3	295	chrSB:900-1100	Ppil2	NO	NO	NULL	242	0.0123967
chr16	21089250	21089550	O112	4	123	chrSB:900-1100	RP24-354B8.1	NO	NO	NULL	242	0.0165289
chr16	90377250	90377550	O112	3	15	chrSB:900-1100	Hunk	YES	NO	NULL	242	0.0123967
chr16	90380850	90381150	O112	5	41	chrSB:900-1100	Hunk	YES	NO	NULL	242	0.0206612
chr17	46231050	46231350	O112	3	155	chrSB:900-1100	Mrps18a	YES	NO	NULL	242	0.0123967
chr17	46233450	46233750	O112	16	180	chrSB:900-1100	Mrps18a	YES	NO	NULL	242	0.0661157
chr17	46237650	46237950	O112	5	52	chrSB:900-1100	Mrps18a	YES	NO	NULL	242	0.0206612
chr17	46237950	46238250	O112	3	62	chrSB:900-1100	Mrps18a	YES	NO	NULL	242	0.0123967
chr17	46366350	46366650	O112	12	607	chrSB:900-1100	Xpo5	YES	NO	NULL	242	0.0495868
chr17	46366650	46366950	O112	7	308	chrSB:900-1100	Xpo5	YES	NO	NULL	242	0.0289256
chr17	46374450	46374750	O112	11	572	chrSB:900-1100	Xpo5	YES	NO	NULL	242	0.0454545
chr17	46376550	46376850	O112	16	1256	chrSB:900-1100	Xpo5	YES	NO	NULL	242	0.0661157
chr18	5279850	5280150	O112	8	19	chrSB:900-1100	Zfp438	NO	NO	NULL	242	0.0330579
chr18	5280150	5280450	O112	5	34	chrSB:900-1100	Zfp438	NO	NO	NULL	242	0.0206612
chr18	21969750	21970050	O112	3	62	chrSB:900-1100	4921528I01Rik	NO	NO	NULL	242	0.0123967
chr18	22568250	22568550	O112	8	62	chrSB:900-1100	Asxl3	YES	NO	NULL	242	0.0330579
chr18	22570050	22570350	O112	3	83	chrSB:900-1100	Asxl3	YES	NO	NULL	242	0.0123967
chr18	37214850	37215150	O112	4	18	chrSB:900-1100	Pcdha6	NO	NO	NULL	242	0.0165289
chr18	67110750	67111050	O112	7	15	chrSB:900-1100	Mc4r	NO	NO	NULL	242	0.0289256
chr19	3869850	3870150	O112	8604	25590	chrSB:900-1100	Chka	YES	YES	NULL	242	35.5537
chr19	3872250	3872550	O112	5	413	chrSB:900-1100	Chka	YES	NO	NULL	242	0.0206612
chr19	15757050	15757350	O112	5	22	chrSB:900-1100	U6	NO	NO	NULL	242	0.0206612
chr19	39127950	39128250	O112	4	160	chrSB:900-1100	Cyp2c65	NO	NO	NULL	242	0.0165289
chr19	55698150	55698450	O112	4	273	chrSB:900-1100	Vti1a	NO	NO	NULL	242	0.0165289
chr2	48871350	48871650	O112	3	20	chrSB:900-1100	Mbd5	NO	NO	NULL	242	0.0123967
chr2	51373350	51373650	O112	4	8	chrSB:900-1100	SCARNA14	NO	NO	NULL	242	0.0165289
chr2	75340950	75341250	O112	12	26	chrSB:900-1100	RP23-261A9.2	NO	NO	NULL	242	0.0495868
chr2	116892450	116892750	O112	3	10	chrSB:900-1100	RP23-224B9.1	NO	NO	NULL	242	0.0123967
chr2	121822950	121823250	O112	4	344	chrSB:900-1100	Ctdspl2	YES	NO	NULL	242	0.0165289
chr2	121829550	121829850	O112	62	334	chrSB:900-1100	Ctdspl2	YES	NO	NULL	242	0.256198
chr2	121829850	121830150	O112	21	307	chrSB:900-1100	Ctdspl2	YES	NO	NULL	242	0.0867769
chr2	121832550	121832850	O112	16	749	chrSB:900-1100	Ctdspl2	YES	NO	NULL	242	0.0661157
chr2	124479150	124479450	O112	17	173	chrSB:900-1100	Sema6d	YES	NO	NULL	242	0.0702479
chr2	124479450	124479750	O112	10	121	chrSB:900-1100	Sema6d	YES	NO	NULL	242	0.0413223
chr2	129037650	129037950	O112	4	14	chrSB:900-1100	RP23-160G19.3	NO	NO	NULL	242	0.0165289
chr2	132841950	132842250	O112	5	18	chrSB:900-1100	U1	NO	NO	NULL	242	0.0206612
chr3	4569150	4569450	O112	3	3	chrSB:900-1100	SNORA38	NO	NO	NULL	242	0.0123967
chr3	13345350	13345650	O112	6	9	chrSB:900-1100	Ralyl	NO	NO	NULL	242	0.0247934
chr3	16323150	16323450	O112	4	5	chrSB:900-1100	Ythdf3	NO	NO	NULL	242	0.0165289
chr3	45126450	45126750	O112	4	13	chrSB:900-1100	AC158956.1	NO	NO	NULL	242	0.0165289
chr3	53813550	53813850	O112	4	17	chrSB:900-1100	Ufm1	NO	NO	NULL	242	0.0165289
chr3	83937750	83938050	O112	6	527	chrSB:900-1100	Mnd1	NO	NO	NULL	242	0.0247934
chr3	106457250	106457550	O112	15	65	chrSB:900-1100	4933421E11Rik	NO	YES	NULL	242	0.0619835
chr3	122030550	122030850	O112	4	188	chrSB:900-1100	mmu-mir-760	NO	NO	NULL	242	0.0165289
chr3	122058150	122058450	O112	705	66518	chrSB:900-1100	mmu-mir-760	NO	NO	NULL	242	2.91322
chr3	122062650	122062950	O112	1502	22940	chrSB:900-1100	Bcar3	NO	NO	NULL	242	6.20661
chr3	122069850	122070150	O112	33	1784	chrSB:900-1100	Bcar3	NO	NO	NULL	242	0.136364
chr3	122070150	122070450	O112	278	3349	chrSB:900-1100	Bcar3	NO	NO	NULL	242	1.14876
chr3	122072550	122072850	O112	51	383	chrSB:900-1100	Bcar3	NO	NO	NULL	242	0.210744
chr3	142572150	142572450	O112	5	15	chrSB:900-1100	Gm10481	NO	NO	NULL	242	0.0206612
chr4	3251850	3252150	O112	5	14	chrSB:900-1100	RP23-461P20.2	YES	NO	NULL	242	0.0206612
chr4	8500950	8501250	O112	92	6214	chrSB:900-1100	Rab2a	YES	NO	NULL	242	0.380165
chr4	8502750	8503050	O112	516	6487	chrSB:900-1100	Rab2a	YES	NO	NULL	242	2.13223
chr4	8506350	8506650	O112	89	3336	chrSB:900-1100	Rab2a	YES	NO	NULL	242	0.367769
chr4	11166450	11166750	O112	22	729	chrSB:900-1100	Ints8	YES	NO	NULL	242	0.0909091
chr4	11168550	11168850	O112	230	1235	chrSB:900-1100	Ints8	YES	NO	NULL	242	0.950413
chr4	11174850	11175150	O112	20	1046	chrSB:900-1100	Ints8	YES	NO	NULL	242	0.0826446
chr4	11175150	11175450	O112	421	4233	chrSB:900-1100	Ints8	YES	NO	NULL	242	1.73967
chr4	17732850	17733150	O112	7	26	chrSB:900-1100	Mmp16	NO	NO	NULL	242	0.0289256
chr4	17843250	17843550	O112	3	146	chrSB:900-1100	Mmp16	NO	NO	NULL	242	0.0123967
chr4	17914650	17914950	O112	38	217	chrSB:900-1100	Mmp16	NO	NO	NULL	242	0.157025
chr4	64348350	64348650	O112	3	9	chrSB:900-1100	RP23-173C3.1	NO	NO	NULL	242	0.0123967
chr4	71369250	71369550	O112	5	14	chrSB:900-1100	RP24-168J7.1	NO	NO	NULL	242	0.0206612
chr4	75157950	75158250	O112	4	18	chrSB:900-1100	RP24-221D22.1	NO	NO	NULL	242	0.0165289
chr4	77377350	77377650	O112	5	9	chrSB:900-1100	Ptprd	NO	NO	NULL	242	0.0206612
chr4	80378250	80378550	O112	8	13	chrSB:900-1100	Tyrp1	NO	NO	NULL	242	0.0330579
chr4	113689050	113689350	O112	5	15	chrSB:900-1100	Skint5	NO	NO	NULL	242	0.0206612
chr4	117186750	117187050	O112	65	4386	chrSB:900-1100	RP23-411H13.3	YES	NO	NULL	242	0.268595
chr4	117187350	117187650	O112	35	3199	chrSB:900-1100	RP23-411H13.3	YES	NO	NULL	242	0.144628
chr4	117190650	117190950	O112	60	1639	chrSB:900-1100	RP23-411H13.3	YES	NO	NULL	242	0.247934
chr4	117190950	117191250	O112	14	976	chrSB:900-1100	RP23-411H13.3	YES	NO	NULL	242	0.0578512
chr4	117194850	117195150	O112	10	673	chrSB:900-1100	RP23-411H13.3	YES	NO	NULL	242	0.0413223
chr4	121832850	121833150	O112	3	4	chrSB:900-1100	RP23-83D8.1	NO	NO	NULL	242	0.0123967
chr4	122094750	122095050	O112	3	7	chrSB:900-1100	RP23-402O17.1	NO	NO	NULL	242	0.0123967
chr4	122633850	122634150	O112	13	620	chrSB:900-1100	Mfsd2a	YES	NO	NULL	242	0.053719
chr4	122636250	122636550	O112	7	278	chrSB:900-1100	Mfsd2a	YES	NO	NULL	242	0.0289256
chr4	122647350	122647650	O112	5	77	chrSB:900-1100	RP23-121J14.4	YES	NO	NULL	242	0.0206612
chr4	122660550	122660850	O112	23156	194998	chrSB:900-1100	Mycl1	YES	NO	NULL	242	95.686
chr4	122661150	122661450	O112	459	30767	chrSB:900-1100	Mycl1	YES	NO	NULL	242	1.89669
chr4	122666550	122666850	O112	23	216	chrSB:900-1100	Mycl1	YES	NO	NULL	242	0.0950413
chr4	122666850	122667150	O112	4	115	chrSB:900-1100	Mycl1	YES	NO	NULL	242	0.0165289
chr4	122670150	122670450	O112	62	742	chrSB:900-1100	Mycl1	YES	NO	NULL	242	0.256198
chr4	122670450	122670750	O112	17	1433	chrSB:900-1100	Mycl1	YES	NO	NULL	242	0.0702479
chr4	122673750	122674050	O112	734	10035	chrSB:900-1100	Mycl1	YES	NO	NULL	242	3.03306
chr4	132541950	132542250	O112	12	205	chrSB:900-1100	Fgr	NO	NO	NULL	242	0.0495868
chr4	132544350	132544650	O112	3	171	chrSB:900-1100	Fgr	NO	NO	NULL	242	0.0123967
chr4	141402450	141402750	O112	7	262	chrSB:900-1100	RP23-423G13.2	NO	NO	NULL	242	0.0289256
chr4	147197850	147198150	O112	25	1901	chrSB:900-1100	2810408P10Rik	NO	NO	NULL	242	0.103306
chr4	149768550	149768850	O112	5	80	chrSB:900-1100	Rere	YES	NO	NULL	242	0.0206612
chr5	6876150	6876450	O112	4	17	chrSB:900-1100	AC115629.1	NO	NO	NULL	242	0.0165289
chr5	6949350	6949650	O112	7	395	chrSB:900-1100	AC115629.1	NO	NO	NULL	242	0.0289256
chr5	6949650	6949950	O112	3	136	chrSB:900-1100	AC115629.1	NO	NO	NULL	242	0.0123967
chr5	7099650	7099950	O112	8	40	chrSB:900-1100	U12	NO	YES	NULL	242	0.0330579
chr5	11155650	11155950	O112	5	55	chrSB:900-1100	AC138119.1	NO	NO	NULL	242	0.0206612
chr5	11314950	11315250	O112	5	28	chrSB:900-1100	AC138119.1	NO	NO	NULL	242	0.0206612
chr5	11743950	11744250	O112	5	22	chrSB:900-1100	Gm6460	NO	NO	NULL	242	0.0206612
chr5	24379650	24379950	O112	203	5865	chrSB:900-1100	AC125270.2	YES	NO	NULL	242	0.838843
chr5	24380850	24381150	O112	183	3237	chrSB:900-1100	AC125270.2	YES	NO	NULL	242	0.756198
chr5	24382650	24382950	O112	156	1836	chrSB:900-1100	Prkag2	YES	NO	NULL	242	0.644628
chr5	24386250	24386550	O112	4	322	chrSB:900-1100	Prkag2	YES	NO	NULL	242	0.0165289
chr5	24844350	24844650	O112	3	181	chrSB:900-1100	Mll3	YES	NO	NULL	242	0.0123967
chr5	24853950	24854250	O112	67	607	chrSB:900-1100	Mll3	YES	NO	NULL	242	0.27686
chr5	24854250	24854550	O112	42	633	chrSB:900-1100	Mll3	YES	NO	NULL	242	0.173554
chr5	24857850	24858150	O112	25	497	chrSB:900-1100	Mll3	YES	NO	NULL	242	0.103306
chr5	24875250	24875550	O112	7	538	chrSB:900-1100	Mll3	YES	NO	NULL	242	0.0289256
chr5	24878550	24878850	O112	36	649	chrSB:900-1100	Mll3	YES	NO	NULL	242	0.14876
chr5	24889650	24889950	O112	58	1515	chrSB:900-1100	Mll3	YES	NO	NULL	242	0.239669
chr5	24901050	24901350	O112	50	585	chrSB:900-1100	Mll3	YES	NO	NULL	242	0.206612
chr5	24910050	24910350	O112	49	974	chrSB:900-1100	Mll3	YES	NO	NULL	242	0.202479
chr5	34349850	34350150	O112	2033	92643	chrSB:900-1100	Poln	YES	NO	NULL	242	8.40083
chr5	34351350	34351650	O112	476	34757	chrSB:900-1100	Poln	YES	NO	NULL	242	1.96694
chr5	34352250	34352550	O112	1205	29589	chrSB:900-1100	Poln	YES	NO	NULL	242	4.97934
chr5	34356150	34356450	O112	1938	28085	chrSB:900-1100	Poln	YES	NO	NULL	242	8.00826
chr5	34356750	34357050	O112	1422	16194	chrSB:900-1100	Poln	YES	NO	NULL	242	5.87603
chr5	34894050	34894350	O112	4	212	chrSB:900-1100	Sh3bp2	NO	NO	NULL	242	0.0165289
chr5	36490950	36491250	O112	238	1825	chrSB:900-1100	Sorcs2	YES	NO	NULL	242	0.983471
chr5	36491250	36491550	O112	69	1536	chrSB:900-1100	Sorcs2	YES	NO	NULL	242	0.285124
chr5	36491550	36491850	O112	31	2108	chrSB:900-1100	Sorcs2	YES	NO	NULL	242	0.128099
chr5	36494250	36494550	O112	274	3233	chrSB:900-1100	Sorcs2	YES	NO	NULL	242	1.13223
chr5	36494550	36494850	O112	98	3543	chrSB:900-1100	Sorcs2	YES	NO	NULL	242	0.404959
chr5	36495750	36496050	O112	157	4053	chrSB:900-1100	Sorcs2	YES	NO	NULL	242	0.64876
chr5	36496050	36496350	O112	345	8330	chrSB:900-1100	Sorcs2	YES	NO	NULL	242	1.42562
chr5	44597550	44597850	O112	4	245	chrSB:900-1100	Tapt1	YES	NO	NULL	242	0.0165289
chr5	44610750	44611050	O112	84	573	chrSB:900-1100	Tapt1	YES	NO	NULL	242	0.347107
chr5	44611350	44611650	O112	19	562	chrSB:900-1100	Tapt1	YES	NO	NULL	242	0.0785124
chr5	44611650	44611950	O112	9	420	chrSB:900-1100	Tapt1	YES	NO	NULL	242	0.0371901
chr5	44614650	44614950	O112	32	769	chrSB:900-1100	Tapt1	YES	NO	NULL	242	0.132231
chr5	44631150	44631450	O112	24	339	chrSB:900-1100	AC103621.1	YES	NO	NULL	242	0.0991736
chr5	44667150	44667450	O112	4	44	chrSB:900-1100	AC103621.1	YES	NO	NULL	242	0.0165289
chr5	44674050	44674350	O112	383	979	chrSB:900-1100	AC103621.1	YES	YES	NULL	242	1.58264
chr5	44697450	44697750	O112	12	180	chrSB:900-1100	AC103621.1	NO	NO	NULL	242	0.0495868
chr5	44742150	44742450	O112	53	689	chrSB:900-1100	Gm10208	NO	NO	NULL	242	0.219008
chr5	44748150	44748450	O112	28	953	chrSB:900-1100	Gm10208	NO	NO	NULL	242	0.115702
chr5	61163850	61164150	O112	6	17	chrSB:900-1100	SNORA17	NO	NO	NULL	242	0.0247934
chr5	98906550	98906850	O112	5	23	chrSB:900-1100	1700007G11Rik	NO	NO	NULL	242	0.0206612
chr5	105211950	105212250	O112	5	9	chrSB:900-1100	AC110537.1	NO	NO	NULL	242	0.0206612
chr5	113357550	113357850	O112	5	105	chrSB:900-1100	Adrbk2	NO	NO	NULL	242	0.0206612
chr6	47488650	47488950	O112	5	243	chrSB:900-1100	Ezh2	NO	NO	NULL	242	0.0206612
chr6	85424550	85424850	O112	3	3	chrSB:900-1100	Fbxo41	NO	NO	NULL	242	0.0123967
chr6	123641550	123641850	O112	3	6	chrSB:900-1100	SNORA17	NO	NO	NULL	242	0.0123967
chr7	3365550	3365850	O112	3	10	chrSB:900-1100	Cacng7	NO	NO	NULL	242	0.0123967
chr7	8461950	8462250	O112	5	8	chrSB:900-1100	AC132246.2	NO	NO	NULL	242	0.0206612
chr7	8986350	8986650	O112	4	8	chrSB:900-1100	AC132246.2	NO	NO	NULL	242	0.0165289
chr7	9389250	9389550	O112	4	7	chrSB:900-1100	Vmn2r30	NO	NO	NULL	242	0.0165289
chr7	9668250	9668550	O112	4	9	chrSB:900-1100	AC150271.1	NO	NO	NULL	242	0.0165289
chr7	18025650	18025950	O112	8	22	chrSB:900-1100	AC151601.1	NO	NO	NULL	242	0.0330579
chr7	18101250	18101550	O112	10	18	chrSB:900-1100	AC126443.1	NO	NO	NULL	242	0.0413223
chr7	39159750	39160050	O112	4	9	chrSB:900-1100	U6	NO	NO	NULL	242	0.0165289
chr7	39280950	39281250	O112	4	12	chrSB:900-1100	Gm5591	NO	NO	NULL	242	0.0165289
chr7	46402650	46402950	O112	5	10	chrSB:900-1100	Gm16387	NO	NO	NULL	242	0.0206612
chr7	53934150	53934450	O112	3	6	chrSB:900-1100	Tph1	NO	NO	NULL	242	0.0123967
chr7	88426050	88426350	O112	14	100	chrSB:900-1100	Pde8a	YES	NO	NULL	242	0.0578512
chr7	88427550	88427850	O112	34	348	chrSB:900-1100	Pde8a	YES	NO	NULL	242	0.140496
chr7	95567250	95567550	O112	4	10	chrSB:900-1100	Rab38	NO	NO	NULL	242	0.0165289
chr8	3053850	3054150	O112	4	21	chrSB:900-1100	AC171332.1	NO	NO	NULL	242	0.0165289
chr8	32163150	32163450	O112	4	7	chrSB:900-1100	Dusp26	NO	NO	NULL	242	0.0165289
chr8	49074450	49074750	O112	10	183	chrSB:900-1100	Wwc2	NO	NO	NULL	242	0.0413223
chr8	49074750	49075050	O112	3	237	chrSB:900-1100	Wwc2	NO	NO	NULL	242	0.0123967
chr8	49096950	49097250	O112	8	210	chrSB:900-1100	Wwc2	NO	NO	NULL	242	0.0330579
chr8	49099950	49100250	O112	3	226	chrSB:900-1100	Wwc2	NO	NO	NULL	242	0.0123967
chr8	49130850	49131150	O112	8	118	chrSB:900-1100	Wwc2	NO	NO	NULL	242	0.0330579
chr8	49152450	49152750	O112	4	121	chrSB:900-1100	Dctd	NO	NO	NULL	242	0.0165289
chr8	49153050	49153350	O112	35	409	chrSB:900-1100	Dctd	NO	NO	NULL	242	0.144628
chr8	49153350	49153650	O112	77	772	chrSB:900-1100	Dctd	NO	NO	NULL	242	0.318182
chr8	83323950	83324250	O112	22	254	chrSB:900-1100	Gab1	YES	NO	NULL	242	0.0909091
chr8	90688650	90688950	O112	1551	8196	chrSB:900-1100	Heatr3	YES	NO	NULL	242	6.40909
chr8	90690750	90691050	O112	403	13492	chrSB:900-1100	Heatr3	YES	NO	NULL	242	1.66529
chr8	95544150	95544450	O112	7	91	chrSB:900-1100	Gm4976	NO	NO	NULL	242	0.0289256
chr8	118305450	118305750	O112	4	13	chrSB:900-1100	Maf	NO	NO	NULL	242	0.0165289
chr9	6771750	6772050	O112	8	20	chrSB:900-1100	U6	NO	NO	NULL	242	0.0330579
chr9	63484050	63484350	O112	5	373	chrSB:900-1100	Aagab	NO	NO	NULL	242	0.0206612
chr9	85117350	85117650	O112	5	457	chrSB:900-1100	AC159809.1	NO	NO	NULL	242	0.0206612
chr9	90476250	90476550	O112	7	8	chrSB:900-1100	U1	NO	NO	NULL	242	0.0289256
chr9	110463450	110463750	O112	231	1192	chrSB:900-1100	Setd2	YES	YES	NULL	242	0.954545
chr9	110465250	110465550	O112	35	1444	chrSB:900-1100	Setd2	YES	NO	NULL	242	0.144628
chrX	10488750	10489050	O112	3	25	chrSB:900-1100	RP23-192N1.1	NO	NO	NULL	242	0.0123967
chrX	15959250	15959550	O112	6	10	chrSB:900-1100	RP23-258L18.1	NO	NO	NULL	242	0.0247934
chrX	18153750	18154050	O112	3	59	chrSB:900-1100	4930578C19Rik	NO	NO	NULL	242	0.0123967
chrX	78887250	78887550	O112	3	6	chrSB:900-1100	RP23-460M19.1	NO	NO	NULL	242	0.0123967
chrX	111061050	111061350	O112	4	6	chrSB:900-1100	SNORA17	NO	NO	NULL	242	0.0165289
chrX	135660750	135661050	O112	3	5	chrSB:900-1100	4930513O06Rik	NO	NO	NULL	242	0.0123967
chrX	139487550	139487850	O112	3	46	chrSB:900-1100	Rgag1	YES	NO	NULL	242	0.0123967
chrX	139586250	139586550	O112	5	495	chrSB:900-1100	RP23-330B20.1	NO	NO	NULL	242	0.0206612
chrX	144036150	144036450	O112	9	21	chrSB:900-1100	Lrch2	NO	NO	NULL	242	0.0371901
chrX	150235050	150235350	O112	3	14	chrSB:900-1100	Smt3h1-ps	NO	NO	NULL	242	0.0123967
chr1	121379550	121379850	O112	39	508	chrSB:2000-2200	Ralb	YES	NO	NULL	242	0.161157
chr1	121379850	121380150	O112	138	5184	chrSB:2000-2200	Ralb	YES	NO	NULL	242	0.570248
chr1	181471050	181471350	O112	33	1998	chrSB:2000-2200	Tfb2m	YES	NO	NULL	242	0.136364
chr10	12469950	12470250	O112	6	12	chrSB:2000-2200	Utrn	YES	NO	NULL	242	0.0247934
chr10	66564750	66565050	O112	4	9	chrSB:2000-2200	Reep3	YES	NO	NULL	242	0.0165289
chr10	104960250	104960550	O112	9	110	chrSB:2000-2200	Tmtc2	YES	NO	NULL	242	0.0371901
chr10	104960550	104960850	O112	90	656	chrSB:2000-2200	Tmtc2	YES	NO	NULL	242	0.371901
chr11	99082350	99082650	O112	117	828	chrSB:2000-2200	Smarce1	NO	NO	NULL	242	0.483471
chr11	102989850	102990150	O112	4	19	chrSB:2000-2200	Hexim2	NO	NO	NULL	242	0.0165289
chr13	9749850	9750150	O112	22	298	chrSB:2000-2200	Zmynd11	YES	NO	NULL	242	0.0909091
chr13	49787850	49788150	O112	12	147	chrSB:2000-2200	Iars	YES	NO	NULL	242	0.0495868
chr13	60502650	60502950	O112	8	94	chrSB:2000-2200	Gm10779	NO	NO	NULL	242	0.0330579
chr13	60502950	60503250	O112	3	16	chrSB:2000-2200	Gm10779	NO	NO	NULL	242	0.0123967
chr14	26350650	26350950	O112	3	20	chrSB:2000-2200	Zmiz1	YES	NO	NULL	242	0.0123967
chr17	46377450	46377750	O112	37	376	chrSB:2000-2200	Xpo5	YES	NO	NULL	242	0.152893
chr19	3875850	3876150	O112	11	190	chrSB:2000-2200	Chka	YES	NO	NULL	242	0.0454545
chr2	121821750	121822050	O112	3	56	chrSB:2000-2200	Ctdspl2	NO	NO	NULL	242	0.0123967
chr3	122077650	122077950	O112	4	47	chrSB:2000-2200	Bcar3	NO	NO	NULL	242	0.0165289
chr4	11163450	11163750	O112	29	220	chrSB:2000-2200	Ints8	NO	NO	NULL	242	0.119835
chr4	117243450	117243750	O112	16	542	chrSB:2000-2200	Eri3	YES	NO	NULL	242	0.0661157
chr4	122669250	122669550	O112	79	139	chrSB:2000-2200	Mycl1	YES	YES	NULL	242	0.326446
chr4	122669550	122669850	O112	14	213	chrSB:2000-2200	Mycl1	YES	NO	NULL	242	0.0578512
chr4	149770650	149770950	O112	58	281	chrSB:2000-2200	Rere	YES	YES	NULL	242	0.239669
chr4	149770950	149771250	O112	27	122	chrSB:2000-2200	Rere	NO	YES	NULL	242	0.11157
chr5	24385350	24385650	O112	5	225	chrSB:2000-2200	Prkag2	YES	NO	NULL	242	0.0206612
chr5	24841350	24841650	O112	8	50	chrSB:2000-2200	Mll3	NO	NO	NULL	242	0.0330579
chr5	44595150	44595450	O112	4	67	chrSB:2000-2200	Tapt1	YES	NO	NULL	242	0.0165289
chr5	151191450	151191750	O112	3	10	chrSB:2000-2200	Fry	NO	NO	NULL	242	0.0123967
chr8	49073550	49073850	O112	3	23	chrSB:2000-2200	Wwc2	NO	NO	NULL	242	0.0123967
chrX	139421850	139422150	O112	20	51	chrSB:2000-2200	Ammecr1	YES	YES	NULL	242	0.0826446
chrX	139422150	139422450	O112	6	113	chrSB:2000-2200	Ammecr1	YES	NO	NULL	242	0.0247934
chr1	182919450	182919750	O165	5	132	chrSB:0-200	Ephx1	NO	NO	NULL	83	0.060241
chr1	182919750	182920050	O165	15	1003	chrSB:0-200	Ephx1	NO	NO	NULL	83	0.180723
chr10	114858450	114858750	O165	5	346	chrSB:0-200	Zfc3h1	YES	NO	NULL	83	0.060241
chr11	4718550	4718850	O165	5	356	chrSB:0-200	Nf2	YES	NO	NULL	83	0.060241
chr19	53607150	53607450	O165	3	36	chrSB:0-200	Dusp5	NO	NO	NULL	83	0.0361446
chr2	4497750	4498050	O165	3	156	chrSB:0-200	Frmd4a	YES	NO	NULL	83	0.0361446
chr2	155936850	155937150	O165	8	189	chrSB:0-200	Rbm12	NO	NO	NULL	83	0.0963855
chr3	152092650	152092950	O165	6	121	chrSB:0-200	Zzz3	YES	NO	NULL	83	0.0722892
chr4	41089650	41089950	O165	4	297	chrSB:0-200	Ube2r2	YES	NO	NULL	83	0.0481928
chr4	41089950	41090250	O165	3	254	chrSB:0-200	Ube2r2	YES	NO	NULL	83	0.0361446
chr4	75907950	75908250	O165	4	103	chrSB:0-200	Ptprd	YES	NO	NULL	83	0.0481928
chr7	119190150	119190450	O165	21	118	chrSB:0-200	Usp47	YES	NO	NULL	83	0.253012
chr8	19686450	19686750	O165	3	281	chrSB:0-200	AC148089.1	NO	NO	NULL	83	0.0361446
chr9	70060650	70060950	O165	3	91	chrSB:0-200	Myo1e	NO	NO	NULL	83	0.0361446
chr9	70329150	70329450	O165	5	28	chrSB:0-200	Rnf111	YES	NO	NULL	83	0.060241
chrX	11617650	11617950	O165	4	62	chrSB:0-200	Bcor	YES	NO	NULL	83	0.0481928
chr1	174034350	174034650	O165	9	788	chrSB:450-650	Copa	YES	NO	NULL	83	0.108434
chr1	174035250	174035550	O165	21	1019	chrSB:450-650	Copa	YES	NO	NULL	83	0.253012
chr10	114857550	114857850	O165	55	935	chrSB:450-650	Zfc3h1	YES	NO	NULL	83	0.662651
chr10	114857850	114858150	O165	24	694	chrSB:450-650	Zfc3h1	YES	NO	NULL	83	0.289157
chr11	3164850	3165150	O165	3	171	chrSB:450-650	Drg1	NO	NO	NULL	83	0.0361446
chr16	32856750	32857050	O165	17	212	chrSB:450-650	1700021K19Rik	YES	NO	NULL	83	0.204819
chr16	32857050	32857350	O165	12	260	chrSB:450-650	1700021K19Rik	YES	NO	NULL	83	0.144578
chr17	27976950	27977250	O165	41	608	chrSB:450-650	Snrpc	YES	NO	NULL	83	0.493976
chr17	27977250	27977550	O165	34	837	chrSB:450-650	Snrpc	YES	NO	NULL	83	0.409639
chr17	27979050	27979350	O165	43	1369	chrSB:450-650	Snrpc	YES	NO	NULL	83	0.518072
chr18	57534150	57534450	O165	31	1478	chrSB:450-650	AC152398.1	YES	NO	NULL	83	0.373494
chr2	4486950	4487250	O165	11	487	chrSB:450-650	Frmd4a	YES	NO	NULL	83	0.13253
chr2	4493250	4493550	O165	27	563	chrSB:450-650	Frmd4a	YES	NO	NULL	83	0.325301
chr2	5794650	5794950	O165	24	561	chrSB:450-650	Sec61a2	YES	NO	NULL	83	0.289157
chr2	5795250	5795550	O165	10	952	chrSB:450-650	Sec61a2	YES	NO	NULL	83	0.120482
chr2	155244450	155244750	O165	4	214	chrSB:450-650	Ncoa6	YES	NO	NULL	83	0.0481928
chr2	155937450	155937750	O165	42	499	chrSB:450-650	Rbm12	YES	NO	NULL	83	0.506024
chr3	152091450	152091750	O165	10	681	chrSB:450-650	Zzz3	YES	NO	NULL	83	0.120482
chr4	11140650	11140950	O165	4	338	chrSB:450-650	Ints8	NO	NO	NULL	83	0.0481928
chr6	65039850	65040150	O165	3	162	chrSB:450-650	Smarcad1	YES	NO	NULL	83	0.0361446
chr6	83894850	83895150	O165	4	176	chrSB:450-650	Zfml	YES	NO	NULL	83	0.0481928
chr6	83896050	83896350	O165	12	405	chrSB:450-650	Zfml	YES	NO	NULL	83	0.144578
chr6	83897550	83897850	O165	3	193	chrSB:450-650	Zfml	YES	NO	NULL	83	0.0361446
chr7	87873750	87874050	O165	26	1512	chrSB:450-650	Iqgap1	NO	NO	NULL	83	0.313253
chr7	119167050	119167350	O165	9	657	chrSB:450-650	Usp47	YES	NO	NULL	83	0.108434
chr8	90680550	90680850	O165	23	545	chrSB:450-650	Heatr3	YES	NO	NULL	83	0.277108
chr8	90680850	90681150	O165	5	330	chrSB:450-650	Heatr3	YES	NO	NULL	83	0.060241
chr1	56027250	56027550	O165	6	212	chrSB:900-1100	Plcl1	NO	NO	NULL	83	0.0722892
chr1	56027850	56028150	O165	4	332	chrSB:900-1100	Plcl1	NO	NO	NULL	83	0.0481928
chr1	74742150	74742450	O165	3	231	chrSB:900-1100	Ttll4	NO	NO	NULL	83	0.0361446
chr1	174038250	174038550	O165	21	1378	chrSB:900-1100	Copa	YES	NO	NULL	83	0.253012
chr11	4708050	4708350	O165	5	346	chrSB:900-1100	Nf2	YES	NO	NULL	83	0.060241
chr11	19608750	19609050	O165	16	705	chrSB:900-1100	Glns-ps1	YES	NO	NULL	83	0.192771
chr11	19609050	19609350	O165	41	324	chrSB:900-1100	Glns-ps1	YES	NO	NULL	83	0.493976
chr13	112639650	112639950	O165	4	13	chrSB:900-1100	RP24-114K21.5	NO	NO	NULL	83	0.0481928
chr14	56851350	56851650	O165	5	397	chrSB:900-1100	Gzmc	NO	NO	NULL	83	0.060241
chr16	32794050	32794350	O165	3	168	chrSB:900-1100	Muc20	YES	NO	NULL	83	0.0361446
chr16	32794650	32794950	O165	13	140	chrSB:900-1100	Muc20	YES	NO	NULL	83	0.156627
chr17	27982050	27982350	O165	23	2171	chrSB:900-1100	Snrpc	YES	NO	NULL	83	0.277108
chr17	81121350	81121650	O165	6	126	chrSB:900-1100	Map4k3	NO	NO	NULL	83	0.0722892
chr18	57541050	57541350	O165	17	925	chrSB:900-1100	AC152398.1	YES	NO	NULL	83	0.204819
chr18	57543750	57544050	O165	14	1356	chrSB:900-1100	AC152398.1	YES	NO	NULL	83	0.168675
chr19	53608350	53608650	O165	5	129	chrSB:900-1100	Dusp5	NO	NO	NULL	83	0.060241
chr2	4507350	4507650	O165	63	776	chrSB:900-1100	Frmd4a	YES	NO	NULL	83	0.759036
chr2	4511550	4511850	O165	21	851	chrSB:900-1100	Frmd4a	YES	NO	NULL	83	0.253012
chr2	155904750	155905050	O165	43	2729	chrSB:900-1100	Nfs1	YES	NO	NULL	83	0.518072
chr2	155905050	155905350	O165	38	1648	chrSB:900-1100	Nfs1	YES	NO	NULL	83	0.457831
chr2	155923950	155924250	O165	33	797	chrSB:900-1100	Rbm12	YES	NO	NULL	83	0.39759
chr2	155929050	155929350	O165	10	496	chrSB:900-1100	Rbm12	YES	NO	NULL	83	0.120482
chr2	155937450	155937750	O165	9	499	chrSB:900-1100	Rbm12	YES	NO	NULL	83	0.108434
chr2	167589450	167589750	O165	4	206	chrSB:900-1100	RP24-151H6.3	NO	NO	NULL	83	0.0481928
chr2	167603550	167603850	O165	20	926	chrSB:900-1100	RP24-151H6.3	NO	NO	NULL	83	0.240964
chr2	168731550	168731850	O165	25	396	chrSB:900-1100	Zfp64	YES	NO	NULL	83	0.301205
chr2	168732150	168732450	O165	19	395	chrSB:900-1100	Zfp64	YES	NO	NULL	83	0.228916
chr2	168732450	168732750	O165	3	136	chrSB:900-1100	Zfp64	YES	NO	NULL	83	0.0361446
chr4	48409050	48409350	O165	5	116	chrSB:900-1100	Invs	NO	NO	NULL	83	0.060241
chr4	48410250	48410550	O165	5	102	chrSB:900-1100	Invs	NO	NO	NULL	83	0.060241
chr4	126546450	126546750	O165	10	160	chrSB:900-1100	Zmym4	YES	NO	NULL	83	0.120482
chr4	138794850	138795150	O165	14	1392	chrSB:900-1100	Capzb	YES	NO	NULL	83	0.168675
chr5	122950950	122951250	O165	150	2155	chrSB:900-1100	Atp2a2	YES	NO	NULL	83	1.80723
chr5	123008250	123008550	O165	4	110	chrSB:900-1100	Ift81	YES	NO	NULL	83	0.0481928
chr5	135568650	135568950	O165	4	6	chrSB:900-1100	Mlxipl	NO	NO	NULL	83	0.0481928
chr6	65042250	65042550	O165	4	190	chrSB:900-1100	Smarcad1	YES	NO	NULL	83	0.0481928
chr6	65044050	65044350	O165	3	233	chrSB:900-1100	Smarcad1	YES	NO	NULL	83	0.0361446
chr6	83897550	83897850	O165	13	193	chrSB:900-1100	Zfml	YES	NO	NULL	83	0.156627
chr6	83897850	83898150	O165	12	338	chrSB:900-1100	Zfml	YES	NO	NULL	83	0.144578
chr7	52423950	52424250	O165	12	138	chrSB:900-1100	Slc17a7	NO	NO	NULL	83	0.144578
chr7	87871650	87871950	O165	14	937	chrSB:900-1100	Iqgap1	NO	NO	NULL	83	0.168675
chr7	87872850	87873150	O165	21	1226	chrSB:900-1100	Iqgap1	NO	NO	NULL	83	0.253012
chr7	106567950	106568250	O165	3	216	chrSB:900-1100	Gdpd5	YES	NO	NULL	83	0.0361446
chr7	106575150	106575450	O165	5	148	chrSB:900-1100	Gdpd5	YES	NO	NULL	83	0.060241
chr7	106575450	106575750	O165	4	90	chrSB:900-1100	Gdpd5	YES	NO	NULL	83	0.0481928
chr8	13098450	13098750	O165	3	196	chrSB:900-1100	Pcid2	YES	NO	NULL	83	0.0361446
chr8	90682050	90682350	O165	8	459	chrSB:900-1100	Heatr3	YES	NO	NULL	83	0.0963855
chr8	93653550	93653850	O165	203	2573	chrSB:900-1100	Aktip	YES	NO	NULL	83	2.44578
chr8	93654750	93655050	O165	43	1314	chrSB:900-1100	Aktip	YES	NO	NULL	83	0.518072
chr1	34876950	34877250	O165	3	261	chrSB:2000-2200	Fam168b	NO	NO	NULL	83	0.0361446
chr1	174036450	174036750	O165	8	478	chrSB:2000-2200	Copa	YES	NO	NULL	83	0.0963855
chr1	182919450	182919750	O165	4	132	chrSB:2000-2200	Ephx1	NO	NO	NULL	83	0.0481928
chr10	114858450	114858750	O165	25	346	chrSB:2000-2200	Zfc3h1	YES	NO	NULL	83	0.301205
chr10	114858750	114859050	O165	10	483	chrSB:2000-2200	Zfc3h1	YES	NO	NULL	83	0.120482
chr11	69833550	69833850	O165	3	68	chrSB:2000-2200	Dlg4	NO	NO	NULL	83	0.0361446
chr11	74515650	74515950	O165	13	169	chrSB:2000-2200	Pafah1b1	NO	NO	NULL	83	0.156627
chr12	82052250	82052550	O165	63	1228	chrSB:2000-2200	Sfrs5	YES	NO	NULL	83	0.759036
chr12	82052550	82052850	O165	43	199	chrSB:2000-2200	Sfrs5	NO	YES	NULL	83	0.518072
chr15	7046250	7046550	O165	29	296	chrSB:2000-2200	Gm10050	YES	NO	NULL	83	0.349398
chr15	81446250	81446550	O165	6	341	chrSB:2000-2200	Ep300	YES	NO	NULL	83	0.0722892
chr15	81446550	81446850	O165	7	210	chrSB:2000-2200	Ep300	YES	NO	NULL	83	0.0843373
chr15	81447150	81447450	O165	40	342	chrSB:2000-2200	Ep300	YES	NO	NULL	83	0.481928
chr16	32855250	32855550	O165	27	89	chrSB:2000-2200	1700021K19Rik	YES	YES	NULL	83	0.325301
chr17	27980850	27981150	O165	78	736	chrSB:2000-2200	Snrpc	YES	NO	NULL	83	0.939759
chr17	66216450	66216750	O165	3	129	chrSB:2000-2200	Ralbp1	YES	NO	NULL	83	0.0361446
chr18	57537150	57537450	O165	25	443	chrSB:2000-2200	AC152398.1	NO	NO	NULL	83	0.301205
chr19	53607150	53607450	O165	4	36	chrSB:2000-2200	Dusp5	NO	NO	NULL	83	0.0481928
chr2	155936550	155936850	O165	5	210	chrSB:2000-2200	Rbm12	YES	NO	NULL	83	0.060241
chr2	155936850	155937150	O165	3	189	chrSB:2000-2200	Rbm12	NO	NO	NULL	83	0.0361446
chr2	167606550	167606850	O165	39	701	chrSB:2000-2200	RP24-151H6.3	NO	NO	NULL	83	0.46988
chr2	167606850	167607150	O165	28	183	chrSB:2000-2200	RP24-151H6.3	NO	NO	NULL	83	0.337349
chr2	168732750	168733050	O165	11	34	chrSB:2000-2200	Zfp64	YES	YES	NULL	83	0.13253
chr4	41089650	41089950	O165	14	297	chrSB:2000-2200	Ube2r2	YES	NO	NULL	83	0.168675
chr4	47382150	47382450	O165	5	82	chrSB:2000-2200	Tgfbr1	YES	NO	NULL	83	0.060241
chr4	138812250	138812550	O165	37	578	chrSB:2000-2200	Capzb	YES	NO	NULL	83	0.445783
chr5	122945550	122945850	O165	24	452	chrSB:2000-2200	Atp2a2	YES	NO	NULL	83	0.289157
chr6	83897250	83897550	O165	3	114	chrSB:2000-2200	Zfml	YES	NO	NULL	83	0.0361446
chr7	87873150	87873450	O165	13	326	chrSB:2000-2200	Iqgap1	NO	NO	NULL	83	0.156627
chr7	106580550	106580850	O165	14	108	chrSB:2000-2200	Gdpd5	YES	NO	NULL	83	0.168675
chr7	148632450	148632750	O165	6	22	chrSB:2000-2200	Rplp2	NO	NO	NULL	83	0.0722892
chr8	90681150	90681450	O165	13	152	chrSB:2000-2200	Heatr3	NO	NO	NULL	83	0.156627
chr8	93660450	93660750	O165	7	41	chrSB:2000-2200	Aktip	YES	NO	NULL	83	0.0843373
chr8	98241150	98241450	O165	6	177	chrSB:2000-2200	Setd6	NO	NO	NULL	83	0.0722892
chr16	30313350	30313650	O167	3	189	chrSB:0-200	Atp13a3	YES	NO	NULL	57	0.0526316
chr16	30313650	30313950	O167	13	308	chrSB:0-200	Atp13a3	YES	NO	NULL	57	0.22807
chr11	53218050	53218350	O167	30	218	chrSB:450-650	Aff4	YES	NO	NULL	57	0.526316
chr11	53219850	53220150	O167	10	213	chrSB:450-650	Aff4	YES	NO	NULL	57	0.175439
chr13	49041150	49041450	O167	5	413	chrSB:450-650	Fam120a	NO	NO	NULL	57	0.0877193
chr4	53156550	53156850	O167	7	60	chrSB:450-650	Abca1	YES	NO	NULL	57	0.122807
chr4	53156850	53157150	O167	3	94	chrSB:450-650	Abca1	YES	NO	NULL	57	0.0526316
chr1	10075950	10076250	O167	25	223	chrSB:900-1100	Cspp1	YES	NO	NULL	57	0.438596
chr1	10106550	10106850	O167	21	700	chrSB:900-1100	Cspp1	YES	NO	NULL	57	0.368421
chr1	10106850	10107150	O167	7	89	chrSB:900-1100	Cspp1	YES	NO	NULL	57	0.122807
chr1	88357350	88357650	O167	14	14	chrSB:900-1100	AC102609.1	NO	NO	NULL	57	0.245614
chr1	88357650	88357950	O167	6	8	chrSB:900-1100	AC102609.1	NO	NO	NULL	57	0.105263
chr10	41886150	41886450	O167	91	300	chrSB:900-1100	Foxo3	NO	YES	NULL	57	1.59649
chr10	79357650	79357950	O167	23	1046	chrSB:900-1100	Med16	NO	NO	NULL	57	0.403509
chr11	53218050	53218350	O167	5	218	chrSB:900-1100	Aff4	YES	NO	NULL	57	0.0877193
chr11	53221350	53221650	O167	71	599	chrSB:900-1100	Aff4	YES	NO	NULL	57	1.24561
chr12	4885950	4886250	O167	3	211	chrSB:900-1100	Ubxn2a	NO	NO	NULL	57	0.0526316
chr12	78325050	78325350	O167	23	177	chrSB:900-1100	Fut8	YES	NO	NULL	57	0.403509
chr12	78336150	78336450	O167	6	31	chrSB:900-1100	Fut8	YES	YES	NULL	57	0.105263
chr12	86405850	86406150	O167	3	90	chrSB:900-1100	Ylpm1	NO	NO	NULL	57	0.0526316
chr13	49027650	49027950	O167	71	937	chrSB:900-1100	Fam120a	NO	NO	NULL	57	1.24561
chr13	49029150	49029450	O167	29	874	chrSB:900-1100	Fam120a	NO	NO	NULL	57	0.508772
chr13	58654950	58655250	O167	21	316	chrSB:900-1100	Slc28a3	NO	NO	NULL	57	0.368421
chr13	74497650	74497950	O167	8	75	chrSB:900-1100	Lrrc14b	NO	NO	NULL	57	0.140351
chr14	63499650	63499950	O167	3	99	chrSB:900-1100	Wdfy2	YES	NO	NULL	57	0.0526316
chr14	63499950	63500250	O167	16	125	chrSB:900-1100	Wdfy2	YES	NO	NULL	57	0.280702
chr14	66232050	66232350	O167	3	45	chrSB:900-1100	RP23-228J3.1	NO	NO	NULL	57	0.0526316
chr15	34402950	34403250	O167	22	106	chrSB:900-1100	BC030476	NO	YES	NULL	57	0.385965
chr15	59386650	59386950	O167	105	1144	chrSB:900-1100	Nsmce2	YES	NO	NULL	57	1.84211
chr15	59400150	59400450	O167	9	860	chrSB:900-1100	Nsmce2	YES	NO	NULL	57	0.157895
chr15	59423250	59423550	O167	903	5593	chrSB:900-1100	Nsmce2	YES	NO	NULL	57	15.8421
chr15	59423550	59423850	O167	878	11264	chrSB:900-1100	Nsmce2	YES	NO	NULL	57	15.4035
chr15	80689050	80689350	O167	10	61	chrSB:900-1100	Tnrc6b	YES	NO	NULL	57	0.175439
chr15	80694750	80695050	O167	6	46	chrSB:900-1100	Tnrc6b	YES	NO	NULL	57	0.105263
chr16	30288450	30288750	O167	11	47	chrSB:900-1100	Lrrc15	YES	YES	NULL	57	0.192982
chr16	30304350	30304650	O167	3	11	chrSB:900-1100	Gp5	YES	NO	NULL	57	0.0526316
chr16	30309750	30310050	O167	5	133	chrSB:900-1100	Gp5	YES	NO	NULL	57	0.0877193
chr16	30312750	30313050	O167	23	280	chrSB:900-1100	Atp13a3	YES	NO	NULL	57	0.403509
chr17	32198550	32198850	O167	12	117	chrSB:900-1100	Rrp1b	NO	NO	NULL	57	0.210526
chr18	83124750	83125050	O167	23	150	chrSB:900-1100	Zfp516	YES	NO	NULL	57	0.403509
chr19	6205950	6206250	O167	13	285	chrSB:900-1100	1700123I01Rik	NO	NO	NULL	57	0.22807
chr19	6206250	6206550	O167	30	432	chrSB:900-1100	1700123I01Rik	NO	NO	NULL	57	0.526316
chr19	6211350	6211650	O167	137	787	chrSB:900-1100	1700123I01Rik	NO	NO	NULL	57	2.40351
chr19	6211650	6211950	O167	14	774	chrSB:900-1100	1700123I01Rik	NO	NO	NULL	57	0.245614
chr19	6212850	6213150	O167	18	1335	chrSB:900-1100	1700123I01Rik	NO	NO	NULL	57	0.315789
chr19	6213150	6213450	O167	110	2625	chrSB:900-1100	1700123I01Rik	NO	NO	NULL	57	1.92982
chr2	59067750	59068050	O167	128	913	chrSB:900-1100	Pkp4	YES	NO	NULL	57	2.24561
chr2	59070150	59070450	O167	19	493	chrSB:900-1100	Pkp4	YES	NO	NULL	57	0.333333
chr2	59071350	59071650	O167	17	187	chrSB:900-1100	Pkp4	YES	NO	NULL	57	0.298246
chr2	59072550	59072850	O167	3	74	chrSB:900-1100	Pkp4	YES	NO	NULL	57	0.0526316
chr2	59072850	59073150	O167	3	87	chrSB:900-1100	Pkp4	YES	NO	NULL	57	0.0526316
chr2	59081850	59082150	O167	7	80	chrSB:900-1100	Pkp4	YES	NO	NULL	57	0.122807
chr2	59082450	59082750	O167	12	146	chrSB:900-1100	Pkp4	YES	NO	NULL	57	0.210526
chr2	59084850	59085150	O167	5	114	chrSB:900-1100	Pkp4	YES	NO	NULL	57	0.0877193
chr2	69521850	69522150	O167	14	621	chrSB:900-1100	Kbtbd10	NO	NO	NULL	57	0.245614
chr2	109810650	109810950	O167	3	61	chrSB:900-1100	Lgr4	YES	NO	NULL	57	0.0526316
chr2	109829850	109830150	O167	34	141	chrSB:900-1100	Lgr4	YES	YES	NULL	57	0.596491
chr2	119794650	119794950	O167	14	252	chrSB:900-1100	Mga	NO	NO	NULL	57	0.245614
chr2	124308750	124309050	O167	5	9	chrSB:900-1100	Sema6d	YES	NO	NULL	57	0.0877193
chr2	124315650	124315950	O167	3	37	chrSB:900-1100	Sema6d	YES	NO	NULL	57	0.0526316
chr2	124332150	124332450	O167	10	73	chrSB:900-1100	Sema6d	YES	NO	NULL	57	0.175439
chr2	124337550	124337850	O167	6	70	chrSB:900-1100	Sema6d	YES	NO	NULL	57	0.105263
chr2	124345050	124345350	O167	4	76	chrSB:900-1100	Sema6d	YES	NO	NULL	57	0.0701754
chr2	124345650	124345950	O167	17	118	chrSB:900-1100	Sema6d	YES	NO	NULL	57	0.298246
chr2	124345950	124346250	O167	105	468	chrSB:900-1100	Sema6d	YES	YES	NULL	57	1.84211
chr2	124479150	124479450	O167	11	115	chrSB:900-1100	Sema6d	NO	NO	NULL	57	0.192982
chr2	154372650	154372950	O167	105	1199	chrSB:900-1100	1700003F12Rik	YES	NO	NULL	57	1.84211
chr2	154372950	154373250	O167	68	1042	chrSB:900-1100	1700003F12Rik	YES	NO	NULL	57	1.19298
chr2	154373550	154373850	O167	31	922	chrSB:900-1100	1700003F12Rik	YES	NO	NULL	57	0.54386
chr2	162946950	162947250	O167	59	807	chrSB:900-1100	RP23-335N12.3	YES	NO	NULL	57	1.03509
chr2	162947850	162948150	O167	3	204	chrSB:900-1100	RP23-335N12.3	YES	NO	NULL	57	0.0526316
chr2	162957150	162957450	O167	10	231	chrSB:900-1100	RP23-335N12.3	YES	NO	NULL	57	0.175439
chr2	162957750	162958050	O167	5	202	chrSB:900-1100	RP23-335N12.3	YES	NO	NULL	57	0.0877193
chr2	162958050	162958350	O167	12	258	chrSB:900-1100	RP23-335N12.3	YES	NO	NULL	57	0.210526
chr3	54604350	54604650	O167	3	22	chrSB:900-1100	Smad9	NO	NO	NULL	57	0.0526316
chr4	35121150	35121450	O167	20	152	chrSB:900-1100	Mobkl2b	YES	NO	NULL	57	0.350877
chr4	35146650	35146950	O167	3	63	chrSB:900-1100	3110043O21Rik	YES	NO	NULL	57	0.0526316
chr4	35151150	35151450	O167	11	73	chrSB:900-1100	3110043O21Rik	YES	NO	NULL	57	0.192982
chr4	35152050	35152350	O167	5	35	chrSB:900-1100	3110043O21Rik	YES	NO	NULL	57	0.0877193
chr4	35165850	35166150	O167	3	122	chrSB:900-1100	3110043O21Rik	YES	NO	NULL	57	0.0526316
chr4	40106250	40106550	O167	182	1304	chrSB:900-1100	Aco1	NO	NO	NULL	57	3.19298
chr4	40106550	40106850	O167	24	464	chrSB:900-1100	Aco1	NO	NO	NULL	57	0.421053
chr4	48447750	48448050	O167	3	132	chrSB:900-1100	Tex10	NO	NO	NULL	57	0.0526316
chr4	53141550	53141850	O167	13	256	chrSB:900-1100	Abca1	YES	NO	NULL	57	0.22807
chr4	53145750	53146050	O167	6	159	chrSB:900-1100	Abca1	YES	NO	NULL	57	0.105263
chr4	107901450	107901750	O167	14	199	chrSB:900-1100	Zyg11b	NO	NO	NULL	57	0.245614
chr4	119205750	119206050	O167	6	217	chrSB:900-1100	RP23-132L14.7	YES	NO	NULL	57	0.105263
chr4	119206050	119206350	O167	13	144	chrSB:900-1100	RP23-132L14.7	YES	NO	NULL	57	0.22807
chr4	122673750	122674050	O167	56	498	chrSB:900-1100	Mycl1	YES	NO	NULL	57	0.982456
chr4	122677050	122677350	O167	34	927	chrSB:900-1100	Mycl1	YES	NO	NULL	57	0.596491
chr4	125844750	125845050	O167	250	1497	chrSB:900-1100	Thrap3	YES	NO	NULL	57	4.38596
chr4	129037650	129037950	O167	54	504	chrSB:900-1100	Zbtb8a	YES	NO	NULL	57	0.947368
chr4	137311650	137311950	O167	55	1719	chrSB:900-1100	Alpl	YES	NO	NULL	57	0.964912
chr4	137314350	137314650	O167	401	2934	chrSB:900-1100	Alpl	YES	NO	NULL	57	7.03509
chr4	150415350	150415650	O167	25	397	chrSB:900-1100	Per3	YES	NO	NULL	57	0.438596
chr4	150416550	150416850	O167	9	108	chrSB:900-1100	Per3	YES	NO	NULL	57	0.157895
chr5	107748150	107748450	O167	10	304	chrSB:900-1100	Brdt	NO	NO	NULL	57	0.175439
chr5	107755650	107755950	O167	4	108	chrSB:900-1100	Brdt	NO	NO	NULL	57	0.0701754
chr5	124918650	124918950	O167	75	1532	chrSB:900-1100	Rilpl2	YES	NO	NULL	57	1.31579
chr5	124919550	124919850	O167	469	2499	chrSB:900-1100	Rilpl2	YES	NO	NULL	57	8.22807
chr5	124934250	124934550	O167	19	130	chrSB:900-1100	Snrnp35	YES	NO	NULL	57	0.333333
chr5	136307850	136308150	O167	3	26	chrSB:900-1100	Srrm3	NO	NO	NULL	57	0.0526316
chr5	136333050	136333350	O167	19	101	chrSB:900-1100	Srrm3	NO	NO	NULL	57	0.333333
chr7	133834050	133834350	O167	14	408	chrSB:900-1100	Giyd2	NO	NO	NULL	57	0.245614
chr9	34873950	34874250	O167	8	41	chrSB:900-1100	St3gal4	YES	YES	NULL	57	0.140351
chr9	34919250	34919550	O167	5	83	chrSB:900-1100	St3gal4	YES	NO	NULL	57	0.0877193
chr9	34925550	34925850	O167	7	116	chrSB:900-1100	RP23-54G12.5	YES	NO	NULL	57	0.122807
chr9	34925850	34926150	O167	18	176	chrSB:900-1100	RP23-54G12.5	YES	NO	NULL	57	0.315789
chr9	63592350	63592650	O167	7	86	chrSB:900-1100	Smad3	YES	NO	NULL	57	0.122807
chr9	63616950	63617250	O167	5	33	chrSB:900-1100	Smad3	YES	NO	NULL	57	0.0877193
chr9	63617250	63617550	O167	48	249	chrSB:900-1100	Smad3	YES	YES	NULL	57	0.842105
chrX	7497750	7498050	O167	9	248	chrSB:900-1100	Pcsk1n	YES	NO	NULL	57	0.157895
chrX	7501950	7502250	O167	1290	13029	chrSB:900-1100	Eras	YES	NO	NULL	57	22.6316
chrX	7502250	7502550	O167	49	2693	chrSB:900-1100	Eras	YES	NO	NULL	57	0.859649
chr12	78345450	78345750	O167	3	70	chrSB:2000-2200	Fut8	YES	NO	NULL	57	0.0526316
chr14	63542550	63542850	O167	4	50	chrSB:2000-2200	Wdfy2	YES	NO	NULL	57	0.0701754
chr16	30313350	30313650	O167	10	189	chrSB:2000-2200	Atp13a3	YES	NO	NULL	57	0.175439
chr2	59086650	59086950	O167	4	48	chrSB:2000-2200	Pkp4	YES	NO	NULL	57	0.0701754
chr4	40108350	40108650	O167	8	47	chrSB:2000-2200	Aco1	NO	NO	NULL	57	0.140351
chr8	109584150	109584450	O167	3	231	chrSB:2000-2200	Tmed6	NO	NO	NULL	57	0.0526316
chrX	7503450	7503750	O167	6	316	chrSB:2000-2200	Eras	YES	NO	NULL	57	0.105263
chr1	169183650	169183950	O235	4	68	chrSB:0-200	Uck2	YES	NO	NULL	60	0.0666667
chr15	61923750	61924050	O235	6	50	chrSB:0-200	Pvt1	YES	NO	YES	60	0.1
chr8	34406250	34406550	O235	3	17	chrSB:0-200	Wrn	NO	NO	NULL	60	0.05
chr12	72241650	72241950	O235	5	21	chrSB:450-650	2700049A03Rik	YES	NO	YES	60	0.0833333
chr17	74893350	74893650	O235	8	622	chrSB:450-650	Yipf4	YES	NO	YES	60	0.133333
chr9	107958150	107958450	O235	3	187	chrSB:450-650	Rnf123	NO	NO	NULL	60	0.05
chr1	168897150	168897450	O235	19	133	chrSB:900-1100	AC119212.1	YES	NO	YES	60	0.316667
chr1	169183950	169184250	O235	6	104	chrSB:900-1100	Uck2	YES	NO	NULL	60	0.1
chr1	182135550	182135850	O235	3	10	chrSB:900-1100	Cabc1	NO	NO	NULL	60	0.05
chr10	66576750	66577050	O235	44	400	chrSB:900-1100	Reep3	NO	NO	YES	60	0.733333
chr10	66577950	66578250	O235	190	3370	chrSB:900-1100	Reep3	NO	NO	YES	60	3.16667
chr10	66578250	66578550	O235	29	787	chrSB:900-1100	Reep3	NO	NO	YES	60	0.483333
chr10	70421550	70421850	O235	40	963	chrSB:900-1100	Bicc1	NO	NO	NULL	60	0.666667
chr10	70423650	70423950	O235	37	494	chrSB:900-1100	Bicc1	NO	NO	NULL	60	0.616667
chr10	70490550	70490850	O235	8	291	chrSB:900-1100	Bicc1	YES	NO	YES	60	0.133333
chr12	8883450	8883750	O235	71	1217	chrSB:900-1100	RP23-344H23.1	YES	NO	YES	60	1.18333
chr12	8884050	8884350	O235	71	607	chrSB:900-1100	RP23-344H23.1	YES	NO	YES	60	1.18333
chr12	101129250	101129550	O235	85	576	chrSB:900-1100	Tdp1	YES	NO	YES	60	1.41667
chr13	14098650	14098950	O235	3	204	chrSB:900-1100	Tbce	NO	NO	NULL	60	0.05
chr15	27473850	27474150	O235	21	582	chrSB:900-1100	Ank	NO	NO	NULL	60	0.35
chr15	61819050	61819350	O235	282	3704	chrSB:900-1100	Myc	YES	NO	YES	60	4.7
chr17	63167850	63168150	O235	3	13	chrSB:900-1100	Efna5	YES	NO	NULL	60	0.05
chr17	74897550	74897850	O235	12	734	chrSB:900-1100	Yipf4	YES	NO	YES	60	0.2
chr2	70662450	70662750	O235	8	86	chrSB:900-1100	Tlk1	YES	NO	YES	60	0.133333
chr2	156586650	156586950	O235	57	835	chrSB:900-1100	Dlgap4	YES	NO	YES	60	0.95
chr2	181342650	181342950	O235	3	151	chrSB:900-1100	Prpf6	NO	NO	NULL	60	0.05
chr3	94643850	94644150	O235	133	3432	chrSB:900-1100	Pogz	YES	NO	YES	60	2.21667
chr3	94644150	94644450	O235	15	1126	chrSB:900-1100	Pogz	YES	NO	YES	60	0.25
chr3	94653750	94654050	O235	43	1337	chrSB:900-1100	Pogz	YES	NO	YES	60	0.716667
chr3	94654050	94654350	O235	75	874	chrSB:900-1100	Pogz	YES	NO	YES	60	1.25
chr3	94654350	94654650	O235	57	741	chrSB:900-1100	Pogz	YES	NO	YES	60	0.95
chr4	95679750	95680050	O235	5	34	chrSB:900-1100	Hook1	NO	NO	NULL	60	0.0833333
chr5	112768950	112769250	O235	14	526	chrSB:900-1100	Srrd	YES	NO	YES	60	0.233333
chr5	112775850	112776150	O235	6	64	chrSB:900-1100	Hps4	YES	NO	YES	60	0.1
chr9	108571950	108572250	O235	3	88	chrSB:900-1100	Slc25a20	NO	NO	NULL	60	0.05
chrX	16777650	16777950	O235	16	137	chrSB:900-1100	Efhc2	YES	NO	YES	60	0.266667
chr1	169183950	169184250	O235	11	104	chrSB:2000-2200	Uck2	YES	NO	NULL	60	0.183333
chr10	66578550	66578850	O235	9	67	chrSB:2000-2200	Reep3	NO	NO	YES	60	0.15
chr12	72248850	72249150	O235	7	16	chrSB:2000-2200	2700049A03Rik	YES	NO	YES	60	0.116667
chr15	61815450	61815750	O235	56	206	chrSB:2000-2200	Myc	NO	YES	YES	60	0.933333
chr16	31786950	31787250	O235	9	190	chrSB:2000-2200	Dlg1	YES	NO	YES	60	0.15
chr16	31787250	31787550	O235	22	97	chrSB:2000-2200	Dlg1	YES	YES	YES	60	0.366667
chr17	74897250	74897550	O235	8	258	chrSB:2000-2200	Yipf4	YES	NO	YES	60	0.133333
chr2	70656150	70656450	O235	6	85	chrSB:2000-2200	Tlk1	YES	NO	YES	60	0.1
chr3	94655850	94656150	O235	13	70	chrSB:2000-2200	Pogz	YES	NO	YES	60	0.216667
chr4	4717050	4717350	O235	3	114	chrSB:2000-2200	Impad1	NO	NO	NULL	60	0.05
chr5	112779450	112779750	O235	7	54	chrSB:2000-2200	Hps4	YES	NO	YES	60	0.116667
chr5	115862250	115862550	O235	14	50	chrSB:2000-2200	RP24-132L16.6	YES	YES	NULL	60	0.233333
chr1	80335350	80335650	O245	9	86	chrSB:0-200	Cul3	YES	NO	YES	91	0.0989011
chr11	23292750	23293050	O245	5	490	chrSB:0-200	Usp34	YES	NO	YES	91	0.0549451
chr11	75597750	75598050	O245	14	87	chrSB:0-200	Doc2b	YES	NO	YES	91	0.153846
chr11	104284050	104284350	O245	3	36	chrSB:0-200	1700081L11Rik	NO	NO	NULL	91	0.032967
chr14	58237650	58237950	O245	7	108	chrSB:0-200	Xpo4	YES	NO	YES	91	0.0769231
chr16	92693250	92693550	O245	7	175	chrSB:0-200	Runx1	NO	NO	YES	91	0.0769231
chr17	29180550	29180850	O245	47	193	chrSB:0-200	Sfrs3	YES	YES	YES	91	0.516484
chr17	88410150	88410450	O245	6	116	chrSB:0-200	Fbxo11	YES	NO	YES	91	0.0659341
chr18	9430950	9431250	O245	3	165	chrSB:0-200	Ccny	NO	NO	YES	91	0.032967
chr5	65996550	65996850	O245	3	35	chrSB:0-200	Ube2k	YES	NO	YES	91	0.032967
chr1	56928150	56928450	O245	18	886	chrSB:450-650	Satb2	YES	NO	YES	91	0.197802
chr1	89823450	89823750	O245	3	162	chrSB:450-650	Dgkd	YES	NO	YES	91	0.032967
chr11	75599550	75599850	O245	47	100	chrSB:450-650	Doc2b	YES	YES	YES	91	0.516484
chr11	75608850	75609150	O245	17	80	chrSB:450-650	RP23-78H4.3	YES	YES	YES	91	0.186813
chr11	117593550	117593850	O245	4	56	chrSB:450-650	Tnrc6c	YES	NO	YES	91	0.043956
chr16	92695650	92695950	O245	62	411	chrSB:450-650	Runx1	NO	NO	YES	91	0.681319
chr16	96249750	96250050	O245	8	43	chrSB:450-650	Brwd1	YES	NO	YES	91	0.0879121
chr17	29178150	29178450	O245	80	7178	chrSB:450-650	Sfrs3	YES	NO	YES	91	0.879121
chr17	42957450	42957750	O245	120	261	chrSB:450-650	Cd2ap	YES	YES	YES	91	1.31868
chr17	42959250	42959550	O245	43	322	chrSB:450-650	Cd2ap	YES	NO	YES	91	0.472527
chr17	42961350	42961650	O245	48	476	chrSB:450-650	Cd2ap	YES	NO	YES	91	0.527473
chr17	88408350	88408650	O245	4	193	chrSB:450-650	Fbxo11	YES	NO	YES	91	0.043956
chr19	4328250	4328550	O245	3	61	chrSB:450-650	Kdm2a	NO	NO	NULL	91	0.032967
chr2	14060550	14060850	O245	4	264	chrSB:450-650	Stam	NO	NO	NULL	91	0.043956
chr2	17986650	17986950	O245	15	89	chrSB:450-650	Mllt10	YES	NO	YES	91	0.164835
chr2	119238150	119238450	O245	6	160	chrSB:450-650	Ino80	YES	NO	YES	91	0.0659341
chr3	117549450	117549750	O245	20	1079	chrSB:450-650	Snx7	NO	NO	YES	91	0.21978
chr4	11173050	11173350	O245	10	90	chrSB:450-650	Ints8	NO	NO	YES	91	0.10989
chr4	11174850	11175150	O245	14	105	chrSB:450-650	Ints8	NO	NO	YES	91	0.153846
chr8	12832650	12832950	O245	4	40	chrSB:450-650	Atp11a	NO	NO	YES	91	0.043956
chr8	12834450	12834750	O245	6	68	chrSB:450-650	Atp11a	NO	NO	YES	91	0.0659341
chr8	41592750	41593050	O245	166	1438	chrSB:450-650	Zdhhc2	YES	NO	YES	91	1.82418
chr9	14375850	14376150	O245	17	101	chrSB:450-650	Amotl1	YES	NO	YES	91	0.186813
chr9	14377050	14377350	O245	5	141	chrSB:450-650	Amotl1	YES	NO	YES	91	0.0549451
chr1	16009350	16009650	O245	3	8	chrSB:900-1100	4930444P10Rik	NO	NO	NULL	91	0.032967
chr1	56906850	56907150	O245	68	689	chrSB:900-1100	Satb2	YES	NO	YES	91	0.747253
chr1	56907150	56907450	O245	5	321	chrSB:900-1100	Satb2	YES	NO	YES	91	0.0549451
chr1	56909850	56910150	O245	7	125	chrSB:900-1100	Satb2	YES	NO	YES	91	0.0769231
chr1	80379450	80379750	O245	5	25	chrSB:900-1100	Cul3	YES	NO	YES	91	0.0549451
chr1	80379750	80380050	O245	5	87	chrSB:900-1100	Cul3	YES	NO	YES	91	0.0549451
chr1	89828250	89828550	O245	8	101	chrSB:900-1100	Dgkd	YES	NO	YES	91	0.0879121
chr1	90526050	90526350	O245	4	17	chrSB:900-1100	Arl4c	NO	NO	NULL	91	0.043956
chr1	90554250	90554550	O245	4	87	chrSB:900-1100	Arl4c	NO	NO	NULL	91	0.043956
chr1	92965050	92965350	O245	38	439	chrSB:900-1100	Lrrfip1	YES	NO	YES	91	0.417582
chr1	92973450	92973750	O245	4	224	chrSB:900-1100	Lrrfip1	YES	NO	YES	91	0.043956
chr1	92975550	92975850	O245	4	236	chrSB:900-1100	Lrrfip1	YES	NO	YES	91	0.043956
chr1	92981250	92981550	O245	6	272	chrSB:900-1100	Lrrfip1	YES	NO	YES	91	0.0659341
chr1	92981550	92981850	O245	3	284	chrSB:900-1100	Lrrfip1	YES	NO	YES	91	0.032967
chr1	92985150	92985450	O245	8	332	chrSB:900-1100	Lrrfip1	YES	NO	YES	91	0.0879121
chr1	92997150	92997450	O245	36	541	chrSB:900-1100	Lrrfip1	YES	NO	YES	91	0.395604
chr1	92997750	92998050	O245	18	1354	chrSB:900-1100	Lrrfip1	YES	NO	YES	91	0.197802
chr1	135287250	135287550	O245	12	561	chrSB:900-1100	Sox13	YES	NO	YES	91	0.131868
chr1	135289650	135289950	O245	76	603	chrSB:900-1100	Sox13	YES	NO	YES	91	0.835165
chr1	192893850	192894150	O245	4	72	chrSB:900-1100	Nsl1	NO	NO	NULL	91	0.043956
chr10	33903750	33904050	O245	3	171	chrSB:900-1100	Dse	NO	NO	YES	91	0.032967
chr10	70421550	70421850	O245	4	377	chrSB:900-1100	Bicc1	NO	NO	NULL	91	0.043956
chr10	70423650	70423950	O245	7	217	chrSB:900-1100	Bicc1	NO	NO	NULL	91	0.0769231
chr10	70490550	70490850	O245	11	162	chrSB:900-1100	Bicc1	NO	NO	NULL	91	0.120879
chr10	70549950	70550250	O245	3	39	chrSB:900-1100	Bicc1	YES	NO	YES	91	0.032967
chr10	86047350	86047650	O245	3	48	chrSB:900-1100	Syn3	NO	NO	NULL	91	0.032967
chr10	95824650	95824950	O245	3	30	chrSB:900-1100	AC153365.1	NO	NO	NULL	91	0.032967
chr11	75593550	75593850	O245	136	1735	chrSB:900-1100	Doc2b	YES	NO	YES	91	1.49451
chr11	75593850	75594150	O245	10	282	chrSB:900-1100	Doc2b	YES	NO	YES	91	0.10989
chr11	75595050	75595350	O245	8	333	chrSB:900-1100	Doc2b	YES	NO	YES	91	0.0879121
chr11	98064750	98065050	O245	8	264	chrSB:900-1100	Crkrs	YES	NO	YES	91	0.0879121
chr11	98065350	98065650	O245	5	163	chrSB:900-1100	Crkrs	YES	NO	YES	91	0.0549451
chr11	98065650	98065950	O245	5	82	chrSB:900-1100	Crkrs	YES	NO	YES	91	0.0549451
chr11	98101950	98102250	O245	4	158	chrSB:900-1100	Crkrs	YES	NO	YES	91	0.043956
chr11	98106450	98106750	O245	13	302	chrSB:900-1100	Crkrs	YES	NO	YES	91	0.142857
chr11	98106750	98107050	O245	8	312	chrSB:900-1100	Crkrs	YES	NO	YES	91	0.0879121
chr11	98112750	98113050	O245	21	441	chrSB:900-1100	Crkrs	YES	NO	YES	91	0.230769
chr11	98113050	98113350	O245	149	787	chrSB:900-1100	Crkrs	YES	NO	YES	91	1.63736
chr11	102604350	102604650	O245	11	63	chrSB:900-1100	RP23-57F11.10	NO	NO	NULL	91	0.120879
chr11	103121550	103121850	O245	90	545	chrSB:900-1100	Map3k14	YES	NO	YES	91	0.989011
chr11	103121850	103122150	O245	11	634	chrSB:900-1100	Map3k14	YES	NO	YES	91	0.120879
chr11	117594750	117595050	O245	17	120	chrSB:900-1100	Tnrc6c	YES	NO	YES	91	0.186813
chr11	117595050	117595350	O245	4	102	chrSB:900-1100	Tnrc6c	YES	NO	YES	91	0.043956
chr12	105800550	105800850	O245	8	102	chrSB:900-1100	Gm10000	YES	NO	YES	91	0.0879121
chr12	105837150	105837450	O245	107	4237	chrSB:900-1100	Dicer1	YES	NO	YES	91	1.17582
chr12	105843150	105843450	O245	153	2100	chrSB:900-1100	Dicer1	YES	NO	YES	91	1.68132
chr12	105846150	105846450	O245	6	203	chrSB:900-1100	Dicer1	YES	NO	YES	91	0.0659341
chr12	105846450	105846750	O245	4	135	chrSB:900-1100	Dicer1	YES	NO	YES	91	0.043956
chr12	105847650	105847950	O245	23	509	chrSB:900-1100	Dicer1	YES	NO	YES	91	0.252747
chr13	32316750	32317050	O245	171	4597	chrSB:900-1100	Gmds	YES	NO	YES	91	1.87912
chr13	32317050	32317350	O245	422	5033	chrSB:900-1100	Gmds	YES	NO	YES	91	4.63736
chr13	32318850	32319150	O245	270	3740	chrSB:900-1100	Gmds	YES	NO	YES	91	2.96703
chr13	32319150	32319450	O245	37	1855	chrSB:900-1100	Gmds	YES	NO	YES	91	0.406593
chr13	32588850	32589150	O245	4	44	chrSB:900-1100	RP23-417P22.2	NO	NO	NULL	91	0.043956
chr13	41465850	41466150	O245	7	168	chrSB:900-1100	Nedd9	NO	NO	NULL	91	0.0769231
chr13	54479850	54480150	O245	3	46	chrSB:900-1100	Cplx2	NO	NO	NULL	91	0.032967
chr13	59708550	59708850	O245	4	187	chrSB:900-1100	Naa35	NO	NO	NULL	91	0.043956
chr13	102576150	102576450	O245	7	62	chrSB:900-1100	Pik3r1	YES	NO	YES	91	0.0769231
chr13	102582450	102582750	O245	6	104	chrSB:900-1100	Pik3r1	YES	NO	YES	91	0.0659341
chr13	102582750	102583050	O245	55	352	chrSB:900-1100	Pik3r1	YES	NO	YES	91	0.604396
chr13	108577950	108578250	O245	28	587	chrSB:900-1100	Zswim6	YES	NO	YES	91	0.307692
chr13	108578250	108578550	O245	21	925	chrSB:900-1100	Zswim6	YES	NO	YES	91	0.230769
chr13	108580950	108581250	O245	234	5256	chrSB:900-1100	Zswim6	YES	NO	YES	91	2.57143
chr13	108592650	108592950	O245	4	100	chrSB:900-1100	Zswim6	YES	NO	YES	91	0.043956
chr13	108592950	108593250	O245	5	166	chrSB:900-1100	Zswim6	YES	NO	YES	91	0.0549451
chr14	21569250	21569550	O245	180	2365	chrSB:900-1100	Camk2g	NO	NO	YES	91	1.97802
chr14	21569550	21569850	O245	811	9705	chrSB:900-1100	Camk2g	YES	NO	YES	91	8.91209
chr14	61490850	61491150	O245	12	1012	chrSB:900-1100	Mipep	NO	NO	YES	91	0.131868
chr14	61493850	61494150	O245	16	999	chrSB:900-1100	Mipep	NO	NO	YES	91	0.175824
chr15	24873150	24873450	O245	3	8	chrSB:900-1100	U1	NO	NO	NULL	91	0.032967
chr15	32347050	32347350	O245	34	169	chrSB:900-1100	Sema5a	YES	YES	YES	91	0.373626
chr15	66714450	66714750	O245	3	32	chrSB:900-1100	Wisp1	NO	NO	NULL	91	0.032967
chr15	74887650	74887950	O245	3	73	chrSB:900-1100	Ly6c1	NO	NO	NULL	91	0.032967
chr15	74887650	74887950	O245	3	73	chrSB:900-1100	Ly6a	NO	NO	NULL	91	0.032967
chr15	74977650	74977950	O245	3	12	chrSB:900-1100	Ly6g	NO	NO	NULL	91	0.032967
chr15	80864550	80864850	O245	4	65	chrSB:900-1100	Mkl1	YES	NO	YES	91	0.043956
chr15	80882550	80882850	O245	5	300	chrSB:900-1100	Mkl1	YES	NO	YES	91	0.0549451
chr15	102009750	102010050	O245	3	241	chrSB:900-1100	Csad	NO	NO	NULL	91	0.032967
chr16	10322850	10323150	O245	3	4	chrSB:900-1100	Emp2	YES	NO	YES	91	0.032967
chr16	30762150	30762450	O245	6	16	chrSB:900-1100	U6	NO	NO	YES	91	0.0659341
chr16	30793650	30793950	O245	6	34	chrSB:900-1100	U6	NO	NO	YES	91	0.0659341
chr16	30796050	30796350	O245	16	121	chrSB:900-1100	U6	NO	NO	YES	91	0.175824
chr16	34227150	34227450	O245	44	386	chrSB:900-1100	Kalrn	NO	NO	YES	91	0.483516
chr16	34235250	34235550	O245	44	432	chrSB:900-1100	Kalrn	NO	NO	YES	91	0.483516
chr16	92668950	92669250	O245	22	459	chrSB:900-1100	Runx1	NO	NO	YES	91	0.241758
chr16	92689050	92689350	O245	45	411	chrSB:900-1100	Runx1	NO	NO	YES	91	0.494505
chr16	96245250	96245550	O245	18	137	chrSB:900-1100	Brwd1	YES	NO	YES	91	0.197802
chr16	96248850	96249150	O245	4	93	chrSB:900-1100	Brwd1	YES	NO	YES	91	0.043956
chr17	8637450	8637750	O245	8	70	chrSB:900-1100	T	NO	NO	YES	91	0.0879121
chr17	17971950	17972250	O245	3	71	chrSB:900-1100	AC165361.2	NO	NO	NULL	91	0.032967
chr17	29195550	29195850	O245	6	81	chrSB:900-1100	RP23-73N16.5	YES	NO	YES	91	0.0659341
chr17	29195850	29196150	O245	5	202	chrSB:900-1100	RP23-73N16.5	YES	NO	YES	91	0.0549451
chr17	42952950	42953250	O245	9	502	chrSB:900-1100	Cd2ap	YES	NO	YES	91	0.0989011
chr17	42953250	42953550	O245	60	576	chrSB:900-1100	Cd2ap	YES	NO	YES	91	0.659341
chr17	45956250	45956550	O245	7	17	chrSB:900-1100	AC165259.1	NO	NO	NULL	91	0.0769231
chr17	45962550	45962850	O245	4	23	chrSB:900-1100	AC165259.1	NO	NO	NULL	91	0.043956
chr17	47786850	47787150	O245	6	72	chrSB:900-1100	Usp49	YES	NO	YES	91	0.0659341
chr17	47808750	47809050	O245	7	78	chrSB:900-1100	Usp49	YES	NO	YES	91	0.0769231
chr17	47809050	47809350	O245	3	263	chrSB:900-1100	Usp49	YES	NO	YES	91	0.032967
chr17	47833950	47834250	O245	101	741	chrSB:900-1100	Frs3	YES	NO	YES	91	1.10989
chr17	47834250	47834550	O245	49	589	chrSB:900-1100	Frs3	YES	NO	YES	91	0.538462
chr17	47835450	47835750	O245	48	1296	chrSB:900-1100	Frs3	YES	NO	YES	91	0.527473
chr17	88408350	88408650	O245	7	193	chrSB:900-1100	Fbxo11	YES	NO	YES	91	0.0769231
chr18	6079950	6080250	O245	6	91	chrSB:900-1100	Arhgap12	YES	NO	YES	91	0.0659341
chr18	6080850	6081150	O245	8	217	chrSB:900-1100	Arhgap12	YES	NO	YES	91	0.0879121
chr18	80519550	80519850	O245	119	2611	chrSB:900-1100	AC145610.2	YES	NO	YES	91	1.30769
chr18	80519850	80520150	O245	43	456	chrSB:900-1100	AC145610.2	YES	NO	YES	91	0.472527
chr18	80536950	80537250	O245	32	229	chrSB:900-1100	AC145610.2	YES	NO	YES	91	0.351648
chr18	80537250	80537550	O245	7	116	chrSB:900-1100	AC145610.2	YES	NO	YES	91	0.0769231
chr19	53301150	53301450	O245	3	69	chrSB:900-1100	Add3	NO	NO	NULL	91	0.032967
chr19	53305650	53305950	O245	3	145	chrSB:900-1100	Add3	NO	NO	NULL	91	0.032967
chr19	60295950	60296250	O245	8	580	chrSB:900-1100	D19Ertd737e	NO	NO	YES	91	0.0879121
chr2	14063250	14063550	O245	53	467	chrSB:900-1100	Stam	NO	NO	NULL	91	0.582418
chr2	14067750	14068050	O245	25	800	chrSB:900-1100	Stam	NO	NO	NULL	91	0.274725
chr2	18031350	18031650	O245	5	49	chrSB:900-1100	Mllt10	YES	NO	YES	91	0.0549451
chr2	18043950	18044250	O245	3	32	chrSB:900-1100	Mllt10	YES	NO	YES	91	0.032967
chr2	44932350	44932650	O245	43	427	chrSB:900-1100	Zeb2	NO	NO	YES	91	0.472527
chr2	44933250	44933550	O245	40	477	chrSB:900-1100	Zeb2	NO	NO	YES	91	0.43956
chr2	44936250	44936550	O245	14	397	chrSB:900-1100	Zeb2	NO	NO	YES	91	0.153846
chr2	44937150	44937450	O245	212	2301	chrSB:900-1100	Zeb2	NO	NO	YES	91	2.32967
chr2	44958750	44959050	O245	27	2450	chrSB:900-1100	Zeb2	NO	NO	YES	91	0.296703
chr2	44962650	44962950	O245	270	3764	chrSB:900-1100	Zeb2	NO	NO	YES	91	2.96703
chr2	44966550	44966850	O245	323	7218	chrSB:900-1100	Zeb2	NO	NO	YES	91	3.54945
chr2	44968350	44968650	O245	870	14974	chrSB:900-1100	Zeb2	NO	NO	YES	91	9.56044
chr2	73430850	73431150	O245	4	52	chrSB:900-1100	RP23-271L22.2	NO	NO	NULL	91	0.043956
chr2	91285950	91286250	O245	22	118	chrSB:900-1100	1110051M20Rik	YES	NO	NULL	91	0.241758
chr2	119218350	119218650	O245	10	390	chrSB:900-1100	Ino80	YES	NO	YES	91	0.10989
chr2	119218650	119218950	O245	6	244	chrSB:900-1100	Ino80	YES	NO	YES	91	0.0659341
chr2	119227950	119228250	O245	61	537	chrSB:900-1100	Ino80	YES	NO	YES	91	0.67033
chr2	119232450	119232750	O245	21	404	chrSB:900-1100	Ino80	YES	NO	YES	91	0.230769
chr2	135485550	135485850	O245	15	131	chrSB:900-1100	Plcb4	NO	NO	NULL	91	0.164835
chr2	145537950	145538250	O245	5	58	chrSB:900-1100	RP23-98P15.1	NO	NO	NULL	91	0.0549451
chr2	152841150	152841450	O245	3	3	chrSB:900-1100	Pdrg1	NO	NO	NULL	91	0.032967
chr2	153640050	153640350	O245	3	4	chrSB:900-1100	RP23-244H7.5	NO	NO	NULL	91	0.032967
chr2	165806250	165806550	O245	3	12	chrSB:900-1100	RP23-108D12.6	NO	NO	NULL	91	0.032967
chr3	27400050	27400350	O245	5	129	chrSB:900-1100	Fndc3b	YES	NO	YES	91	0.0549451
chr3	27400350	27400650	O245	13	210	chrSB:900-1100	Fndc3b	YES	NO	YES	91	0.142857
chr3	69730650	69730950	O245	3	4	chrSB:900-1100	SNORA17	NO	NO	NULL	91	0.032967
chr3	105762750	105763050	O245	10	594	chrSB:900-1100	Atp5f1	YES	NO	YES	91	0.10989
chr3	117541650	117541950	O245	419	4669	chrSB:900-1100	Snx7	NO	NO	YES	91	4.6044
chr3	117542550	117542850	O245	32	773	chrSB:900-1100	Snx7	NO	NO	YES	91	0.351648
chr3	117542850	117543150	O245	145	2402	chrSB:900-1100	Snx7	NO	NO	YES	91	1.59341
chr3	132435150	132435450	O245	52	335	chrSB:900-1100	Tbck	NO	NO	NULL	91	0.571429
chr3	157703250	157703550	O245	8	128	chrSB:900-1100	Lrrc40	NO	NO	NULL	91	0.0879121
chr4	11168550	11168850	O245	12	604	chrSB:900-1100	Ints8	NO	NO	YES	91	0.131868
chr4	11172750	11173050	O245	126	711	chrSB:900-1100	Ints8	NO	NO	YES	91	1.38462
chr4	19388850	19389150	O245	22	105	chrSB:900-1100	Cngb3	NO	YES	NULL	91	0.241758
chr4	19408950	19409250	O245	26	258	chrSB:900-1100	Cngb3	NO	NO	NULL	91	0.285714
chr4	40124850	40125150	O245	9	232	chrSB:900-1100	Aco1	NO	NO	NULL	91	0.0989011
chr4	40216950	40217250	O245	3	131	chrSB:900-1100	RP23-9F23.4	NO	NO	NULL	91	0.032967
chr4	41120850	41121150	O245	182	2437	chrSB:900-1100	Ube2r2	YES	NO	YES	91	2
chr4	41121150	41121450	O245	121	2088	chrSB:900-1100	Ube2r2	YES	NO	YES	91	1.32967
chr4	41130150	41130450	O245	459	5826	chrSB:900-1100	Ube2r2	YES	NO	YES	91	5.04396
chr4	59811150	59811450	O245	3	9	chrSB:900-1100	1110054O05Rik	NO	NO	NULL	91	0.032967
chr4	81999450	81999750	O245	36	311	chrSB:900-1100	Nfib	YES	NO	YES	91	0.395604
chr4	82005450	82005750	O245	14	195	chrSB:900-1100	Nfib	YES	NO	YES	91	0.153846
chr4	82129950	82130250	O245	11	255	chrSB:900-1100	Nfib	YES	NO	YES	91	0.120879
chr4	82132050	82132350	O245	30	707	chrSB:900-1100	Nfib	YES	NO	YES	91	0.32967
chr4	108562650	108562950	O245	12	229	chrSB:900-1100	Rab3b	NO	NO	NULL	91	0.131868
chr4	108562950	108563250	O245	162	1424	chrSB:900-1100	Rab3b	NO	NO	NULL	91	1.78022
chr4	120561450	120561750	O245	4	68	chrSB:900-1100	Rims3	NO	NO	NULL	91	0.043956
chr4	130280250	130280550	O245	15	760	chrSB:900-1100	Pum1	YES	NO	YES	91	0.164835
chr4	130280550	130280850	O245	19	961	chrSB:900-1100	Pum1	YES	NO	YES	91	0.208791
chr4	130284450	130284750	O245	3	95	chrSB:900-1100	Pum1	YES	NO	YES	91	0.032967
chr4	130285350	130285650	O245	10	197	chrSB:900-1100	Pum1	YES	NO	YES	91	0.10989
chr4	134355750	134356050	O245	243	1099	chrSB:900-1100	Tmem57	YES	YES	YES	91	2.67033
chr4	134357550	134357850	O245	43	2806	chrSB:900-1100	Tmem57	YES	NO	YES	91	0.472527
chr4	138835650	138835950	O245	104	4235	chrSB:900-1100	Capzb	YES	NO	YES	91	1.14286
chr4	138835950	138836250	O245	989	10210	chrSB:900-1100	Capzb	YES	NO	YES	91	10.8681
chr4	138836250	138836550	O245	369	15130	chrSB:900-1100	Capzb	YES	NO	YES	91	4.05495
chr5	48672750	48673050	O245	3	266	chrSB:900-1100	Slit2	NO	NO	NULL	91	0.032967
chr5	66058650	66058950	O245	6	52	chrSB:900-1100	Pds5a	YES	NO	YES	91	0.0659341
chr5	66058950	66059250	O245	22	143	chrSB:900-1100	Pds5a	YES	NO	YES	91	0.241758
chr5	66096450	66096750	O245	4	222	chrSB:900-1100	Pds5a	YES	NO	YES	91	0.043956
chr5	110846850	110847150	O245	3	115	chrSB:900-1100	Fbrsl1	YES	NO	YES	91	0.032967
chr5	110861850	110862150	O245	19	429	chrSB:900-1100	Fbrsl1	YES	NO	YES	91	0.208791
chr5	134766450	134766750	O245	8	275	chrSB:900-1100	Gtf2i	YES	NO	YES	91	0.0879121
chr5	134771250	134771550	O245	5	422	chrSB:900-1100	Gtf2i	YES	NO	YES	91	0.0549451
chr5	151989750	151990050	O245	5	73	chrSB:900-1100	Stard13	NO	NO	YES	91	0.0549451
chr6	52700850	52701150	O245	59	1055	chrSB:900-1100	Tax1bp1	NO	NO	NULL	91	0.648352
chr6	52701150	52701450	O245	148	1215	chrSB:900-1100	Tax1bp1	NO	NO	NULL	91	1.62637
chr6	52703250	52703550	O245	35	1688	chrSB:900-1100	Tax1bp1	NO	NO	NULL	91	0.384615
chr6	72156750	72157050	O245	11	947	chrSB:900-1100	Atoh8	NO	NO	YES	91	0.120879
chr6	86875050	86875350	O245	29	96	chrSB:900-1100	Aak1	NO	YES	YES	91	0.318681
chr6	86885250	86885550	O245	11	143	chrSB:900-1100	Aak1	NO	NO	YES	91	0.120879
chr6	149176650	149176950	O245	3	15	chrSB:900-1100	Amn1	NO	NO	NULL	91	0.032967
chr7	17090850	17091150	O245	3	90	chrSB:900-1100	Grlf1	YES	NO	YES	91	0.032967
chr7	17118750	17119050	O245	12	286	chrSB:900-1100	Grlf1	YES	NO	YES	91	0.131868
chr7	17119050	17119350	O245	5	402	chrSB:900-1100	Grlf1	YES	NO	YES	91	0.0549451
chr7	17164950	17165250	O245	5	26	chrSB:900-1100	Grlf1	YES	NO	YES	91	0.0549451
chr7	17180250	17180550	O245	63	431	chrSB:900-1100	Grlf1	YES	NO	YES	91	0.692308
chr8	12835050	12835350	O245	6	60	chrSB:900-1100	AC134581.1	NO	NO	YES	91	0.0659341
chr8	12837750	12838050	O245	48	297	chrSB:900-1100	AC134581.1	NO	NO	YES	91	0.527473
chr8	12842550	12842850	O245	13	271	chrSB:900-1100	AC134581.1	NO	NO	YES	91	0.142857
chr8	12842850	12843150	O245	13	736	chrSB:900-1100	AC134581.1	NO	NO	YES	91	0.142857
chr8	23987550	23987850	O245	28	191	chrSB:900-1100	Myst3	NO	NO	YES	91	0.307692
chr8	41584650	41584950	O245	88	2865	chrSB:900-1100	Zdhhc2	YES	NO	YES	91	0.967033
chr8	41585850	41586150	O245	109	1442	chrSB:900-1100	Zdhhc2	YES	NO	YES	91	1.1978
chr8	41586150	41586450	O245	63	1702	chrSB:900-1100	Zdhhc2	YES	NO	YES	91	0.692308
chr8	72688950	72689250	O245	6	37	chrSB:900-1100	Mef2b	NO	NO	YES	91	0.0659341
chr8	126809550	126809850	O245	57	670	chrSB:900-1100	Galnt2	YES	NO	YES	91	0.626374
chr8	126810150	126810450	O245	5	126	chrSB:900-1100	Galnt2	YES	NO	YES	91	0.0549451
chr8	129830250	129830550	O245	5	92	chrSB:900-1100	Pard3	YES	NO	YES	91	0.0549451
chr9	14362950	14363250	O245	34	443	chrSB:900-1100	Amotl1	YES	NO	YES	91	0.373626
chr9	14366250	14366550	O245	19	224	chrSB:900-1100	Amotl1	YES	NO	YES	91	0.208791
chr9	14366550	14366850	O245	13	318	chrSB:900-1100	Amotl1	YES	NO	YES	91	0.142857
chr9	15994650	15994950	O245	8	109	chrSB:900-1100	Fat3	NO	NO	NULL	91	0.0879121
chr9	16020750	16021050	O245	3	16	chrSB:900-1100	Fat3	NO	NO	NULL	91	0.032967
chr9	16028850	16029150	O245	4	15	chrSB:900-1100	Fat3	NO	NO	NULL	91	0.043956
chr9	44129850	44130150	O245	6	83	chrSB:900-1100	C2cd2l	YES	NO	YES	91	0.0659341
chr9	44135250	44135550	O245	15	855	chrSB:900-1100	Dpagt1	YES	NO	YES	91	0.164835
chr9	44135550	44135850	O245	108	1717	chrSB:900-1100	Dpagt1	YES	NO	YES	91	1.18681
chr9	44135850	44136150	O245	33	2121	chrSB:900-1100	Dpagt1	YES	NO	YES	91	0.362637
chrX	7733550	7733850	O245	6	164	chrSB:900-1100	Tbc1d25	NO	NO	NULL	91	0.0659341
chrX	12897450	12897750	O245	3	17	chrSB:900-1100	RP23-165J1.1	NO	NO	NULL	91	0.032967
chrX	20442150	20442450	O245	4	37	chrSB:900-1100	Syn1	NO	NO	NULL	91	0.043956
chrX	136994850	136995150	O245	6	74	chrSB:900-1100	Prps1	NO	NO	YES	91	0.0659341
chrX	136999650	136999950	O245	50	868	chrSB:900-1100	Prps1	NO	NO	YES	91	0.549451
chrX	139528350	139528650	O245	15	653	chrSB:900-1100	Rgag1	NO	NO	NULL	91	0.164835
chr1	80335650	80335950	O245	4	84	chrSB:2000-2200	Cul3	YES	NO	YES	91	0.043956
chr11	23292750	23293050	O245	7	490	chrSB:2000-2200	Usp34	YES	NO	YES	91	0.0769231
chr11	98122350	98122650	O245	3	15	chrSB:2000-2200	Crkrs	YES	NO	YES	91	0.032967
chr12	4966650	4966950	O245	5	14	chrSB:2000-2200	Atad2b	YES	NO	NULL	91	0.0549451
chr12	105847650	105847950	O245	63	509	chrSB:2000-2200	Dicer1	YES	NO	YES	91	0.692308
chr13	102533850	102534150	O245	6	19	chrSB:2000-2200	Pik3r1	NO	NO	YES	91	0.0659341
chr13	108569550	108569850	O245	5	32	chrSB:2000-2200	Zswim6	NO	NO	YES	91	0.0549451
chr14	58237650	58237950	O245	23	108	chrSB:2000-2200	Xpo4	YES	YES	YES	91	0.252747
chr16	92692950	92693250	O245	15	351	chrSB:2000-2200	Runx1	NO	NO	YES	91	0.164835
chr16	92693250	92693550	O245	25	175	chrSB:2000-2200	Runx1	NO	NO	YES	91	0.274725
chr17	42956850	42957150	O245	8	79	chrSB:2000-2200	Cd2ap	YES	NO	YES	91	0.0879121
chr17	47833050	47833350	O245	3	32	chrSB:2000-2200	Frs3	YES	NO	YES	91	0.032967
chr17	88410150	88410450	O245	5	116	chrSB:2000-2200	Fbxo11	YES	NO	YES	91	0.0549451
chr3	117544050	117544350	O245	15	533	chrSB:2000-2200	Snx7	NO	NO	YES	91	0.164835
chr4	130285650	130285950	O245	14	61	chrSB:2000-2200	Pum1	YES	YES	YES	91	0.153846
chr4	134351250	134351550	O245	3	11	chrSB:2000-2200	Tmem57	YES	NO	YES	91	0.032967
chr4	149774550	149774850	O245	13	27	chrSB:2000-2200	Rere	YES	NO	YES	91	0.142857
chr5	65996850	65997150	O245	37	60	chrSB:2000-2200	Ube2k	YES	YES	YES	91	0.406593
chr5	134764950	134765250	O245	44	308	chrSB:2000-2200	Gtf2i	YES	NO	YES	91	0.483516
chr5	134765250	134765550	O245	15	305	chrSB:2000-2200	Gtf2i	YES	NO	YES	91	0.164835
chr7	17105850	17106150	O245	3	84	chrSB:2000-2200	Grlf1	YES	NO	YES	91	0.032967
chr7	17130150	17130450	O245	4	90	chrSB:2000-2200	Grlf1	YES	NO	YES	91	0.043956
chr8	23988750	23989050	O245	12	40	chrSB:2000-2200	Myst3	NO	YES	YES	91	0.131868
chr8	41588550	41588850	O245	3	182	chrSB:2000-2200	Zdhhc2	YES	NO	YES	91	0.032967
chr8	41588850	41589150	O245	5	158	chrSB:2000-2200	Zdhhc2	YES	NO	YES	91	0.0549451
chr8	98004150	98004450	O245	3	80	chrSB:2000-2200	Csnk2a2	YES	NO	YES	91	0.032967
chr8	98004450	98004750	O245	4	109	chrSB:2000-2200	Csnk2a2	YES	NO	YES	91	0.043956
chr9	44125350	44125650	O245	5	58	chrSB:2000-2200	C2cd2l	YES	NO	YES	91	0.0549451
chrX	17832750	17833050	O245	3	46	chrSB:2000-2200	Kdm6a	YES	NO	YES	91	0.032967
chrX	139419750	139420050	O245	7	13	chrSB:2000-2200	Ammecr1	YES	NO	YES	91	0.0769231
chr5	121659450	121659750	O315	16	81	chrSB:0-200	Rpl6	YES	YES	YES	18	0.888889
chr12	113909550	113909850	O315	9	259	chrSB:450-650	Akt1	YES	NO	YES	18	0.5
chr1	90570750	90571050	O315	11	194	chrSB:900-1100	Arl4c	NO	NO	YES	18	0.611111
chr1	90571050	90571350	O315	87	528	chrSB:900-1100	Arl4c	NO	NO	YES	18	4.83333
chr1	90576150	90576450	O315	3	34	chrSB:900-1100	Arl4c	NO	NO	YES	18	0.166667
chr1	174223350	174223650	O315	18	166	chrSB:900-1100	Igsf8	NO	NO	YES	18	1
chr1	174223650	174223950	O315	13	161	chrSB:900-1100	Igsf8	NO	NO	YES	18	0.722222
chr1	174227850	174228150	O315	3	51	chrSB:900-1100	Igsf8	NO	NO	YES	18	0.166667
chr1	174234150	174234450	O315	5	59	chrSB:900-1100	Igsf8	NO	NO	YES	18	0.277778
chr10	8471250	8471550	O315	45	258	chrSB:900-1100	Sash1	YES	NO	YES	18	2.5
chr10	8476350	8476650	O315	30	312	chrSB:900-1100	Sash1	YES	NO	YES	18	1.66667
chr12	113897550	113897850	O315	7	600	chrSB:900-1100	Akt1	YES	NO	YES	18	0.388889
chr12	113900250	113900550	O315	10	579	chrSB:900-1100	Akt1	YES	NO	YES	18	0.555556
chr14	19961250	19961550	O315	3	19	chrSB:900-1100	AC165092.1	NO	NO	YES	18	0.166667
chr14	77270550	77270850	O315	4	83	chrSB:900-1100	9030625A04Rik	YES	NO	YES	18	0.222222
chr14	77270850	77271150	O315	17	73	chrSB:900-1100	9030625A04Rik	YES	YES	YES	18	0.944444
chr14	77274450	77274750	O315	3	9	chrSB:900-1100	9030625A04Rik	YES	NO	YES	18	0.166667
chr15	75639750	75640050	O315	4	59	chrSB:900-1100	Zc3h3	NO	NO	YES	18	0.222222
chr15	97020450	97020750	O315	3	41	chrSB:900-1100	Amigo2	NO	NO	NULL	18	0.166667
chr17	15125850	15126150	O315	5	280	chrSB:900-1100	AC182749.2	NO	NO	NULL	18	0.277778
chr17	15157050	15157350	O315	5	237	chrSB:900-1100	Gm3435	NO	NO	NULL	18	0.277778
chr17	15188550	15188850	O315	5	200	chrSB:900-1100	9030025P20Rik	NO	NO	NULL	18	0.277778
chr17	81120450	81120750	O315	3	62	chrSB:900-1100	Map4k3	NO	NO	NULL	18	0.166667
chr17	81121350	81121650	O315	10	85	chrSB:900-1100	Map4k3	NO	NO	NULL	18	0.555556
chr18	43151850	43152150	O315	3	24	chrSB:900-1100	Ppp2r2b	YES	NO	YES	18	0.166667
chr18	43155750	43156050	O315	15	47	chrSB:900-1100	Ppp2r2b	YES	YES	YES	18	0.833333
chr18	43156050	43156350	O315	5	110	chrSB:900-1100	Ppp2r2b	YES	NO	YES	18	0.277778
chr19	32872350	32872650	O315	5	49	chrSB:900-1100	Pten	YES	NO	YES	18	0.277778
chr2	166931550	166931850	O315	9	98	chrSB:900-1100	Kcnb1	NO	NO	NULL	18	0.5
chr3	97830150	97830450	O315	45	444	chrSB:900-1100	Notch2	NO	NO	NULL	18	2.5
chr3	115411650	115411950	O315	32	155	chrSB:900-1100	S1pr1	NO	YES	YES	18	1.77778
chr4	43597050	43597350	O315	4	397	chrSB:900-1100	Rgp1	NO	NO	YES	18	0.222222
chr4	43601850	43602150	O315	14	59	chrSB:900-1100	RP23-191F22.5	NO	YES	YES	18	0.777778
chr4	79787850	79788150	O315	3	16	chrSB:900-1100	RP23-42C15.3	NO	NO	NULL	18	0.166667
chr4	137652450	137652750	O315	3	110	chrSB:900-1100	Eif4g3	NO	NO	YES	18	0.166667
chr4	138794850	138795150	O315	75	896	chrSB:900-1100	Capzb	NO	NO	YES	18	4.16667
chr4	138813150	138813450	O315	105	2110	chrSB:900-1100	Capzb	NO	NO	YES	18	5.83333
chr5	75558150	75558450	O315	40	798	chrSB:900-1100	Pdgfra	YES	NO	YES	18	2.22222
chr5	75559350	75559650	O315	164	1767	chrSB:900-1100	Pdgfra	YES	NO	YES	18	9.11111
chr5	75589350	75589650	O315	4	256	chrSB:900-1100	Pdgfra	YES	NO	YES	18	0.222222
chr6	51511950	51512250	O315	3	87	chrSB:900-1100	Snx10	YES	NO	YES	18	0.166667
chr6	72583950	72584250	O315	7	90	chrSB:900-1100	Tcf7l1	NO	NO	NULL	18	0.388889
chr8	86638650	86638950	O315	4	19	chrSB:900-1100	Dcaf15	NO	NO	NULL	18	0.222222
chrX	70768050	70768350	O315	4	8	chrSB:900-1100	Atp2b3	NO	NO	NULL	18	0.222222
chrX	148458450	148458750	O315	4	36	chrSB:900-1100	Smc1a	NO	NO	YES	18	0.222222
chrX	148470450	148470750	O315	16	208	chrSB:900-1100	Smc1a	NO	NO	YES	18	0.888889
chr1	90598950	90599250	O315	13	38	chrSB:2000-2200	Arl4c	NO	YES	YES	18	0.722222
chr5	75589650	75589950	O315	6	228	chrSB:2000-2200	Pdgfra	YES	NO	YES	18	0.333333
chr8	108661650	108661950	O315	7	54	chrSB:2000-2200	AC133195.2	NO	NO	NULL	18	0.388889
chr9	89989650	89989950	O315	5	308	chrSB:2000-2200	Morf4l1	NO	NO	YES	18	0.277778
chr16	31666950	31667250	O31	4	40	chrSB:0-200	Dlg1	NO	NO	NULL	96	0.0416667
chr17	78774450	78774750	O31	18	132	chrSB:0-200	Crim1	YES	NO	NULL	96	0.1875
chr2	117003450	117003750	O31	32	465	chrSB:0-200	Spred1	NO	NO	NULL	96	0.333333
chr4	154981950	154982250	O31	6	28	chrSB:0-200	Slc35e2	YES	NO	NULL	96	0.0625
chr7	17185650	17185950	O31	3	30	chrSB:0-200	Grlf1	NO	NO	NULL	96	0.03125
chr7	52147050	52147350	O31	9	259	chrSB:0-200	Med25	YES	NO	NULL	96	0.09375
chr11	90127350	90127650	O31	8	185	chrSB:450-650	Mmd	NO	NO	NULL	96	0.0833333
chr15	95663850	95664150	O31	3	13	chrSB:450-650	Ano6	YES	NO	NULL	96	0.03125
chr16	13378350	13378650	O31	5	23	chrSB:450-650	Mkl2	YES	NO	NULL	96	0.0520833
chr16	13379850	13380150	O31	7	35	chrSB:450-650	Mkl2	YES	YES	NULL	96	0.0729167
chr16	13381350	13381650	O31	5	23	chrSB:450-650	Mkl2	YES	NO	NULL	96	0.0520833
chr16	31664850	31665150	O31	24	107	chrSB:450-650	Dlg1	NO	YES	NULL	96	0.25
chr16	31665450	31665750	O31	37	169	chrSB:450-650	Dlg1	NO	YES	NULL	96	0.385417
chr17	42957450	42957750	O31	5	74	chrSB:450-650	Cd2ap	YES	NO	NULL	96	0.0520833
chr2	29726550	29726850	O31	130	627	chrSB:450-650	Cercam	YES	YES	NULL	96	1.35417
chr2	29726850	29727150	O31	6	250	chrSB:450-650	Cercam	YES	NO	NULL	96	0.0625
chr3	36786450	36786750	O31	3	6	chrSB:450-650	4932438A13Rik	NO	NO	NULL	96	0.03125
chr4	11174850	11175150	O31	3	26	chrSB:450-650	Ints8	NO	NO	NULL	96	0.03125
chr4	47415750	47416050	O31	3	64	chrSB:450-650	Tgfbr1	YES	NO	NULL	96	0.03125
chr4	47416050	47416350	O31	10	81	chrSB:450-650	Tgfbr1	YES	NO	NULL	96	0.104167
chr4	136148850	136149150	O31	5	93	chrSB:450-650	Kdm1a	NO	NO	NULL	96	0.0520833
chr4	154983750	154984050	O31	13	45	chrSB:450-650	Slc35e2	YES	YES	NULL	96	0.135417
chr5	54507150	54507450	O31	41	564	chrSB:450-650	Stim2	YES	NO	NULL	96	0.427083
chr7	52147350	52147650	O31	38	267	chrSB:450-650	Med25	YES	NO	NULL	96	0.395833
chr7	52147650	52147950	O31	25	215	chrSB:450-650	Med25	YES	NO	NULL	96	0.260417
chr9	110472150	110472450	O31	13	146	chrSB:450-650	Setd2	NO	NO	NULL	96	0.135417
chr9	110474250	110474550	O31	18	116	chrSB:450-650	Setd2	NO	NO	NULL	96	0.1875
chrX	71482650	71482950	O31	209	900	chrSB:450-650	Flna	YES	YES	NULL	96	2.17708
chrX	148696350	148696650	O31	5	185	chrSB:450-650	Kdm5c	YES	NO	NULL	96	0.0520833
chrX	148696650	148696950	O31	51	249	chrSB:450-650	Kdm5c	YES	YES	NULL	96	0.53125
chr1	4772550	4772850	O31	13	958	chrSB:900-1100	Mrpl15	NO	NO	NULL	96	0.135417
chr1	9796050	9796350	O31	3	22	chrSB:900-1100	Sgk3	YES	NO	NULL	96	0.03125
chr1	9898650	9898950	O31	5	16	chrSB:900-1100	6030422M02Rik	YES	NO	NULL	96	0.0520833
chr1	40159050	40159350	O31	29	147	chrSB:900-1100	Il1r2	NO	YES	NULL	96	0.302083
chr1	40159350	40159650	O31	8	129	chrSB:900-1100	Il1r2	NO	NO	NULL	96	0.0833333
chr1	40162050	40162350	O31	18	505	chrSB:900-1100	Il1r2	NO	NO	NULL	96	0.1875
chr1	135983250	135983550	O31	5	36	chrSB:900-1100	Btg2	NO	NO	NULL	96	0.0520833
chr1	154920750	154921050	O31	13	109	chrSB:900-1100	Nmnat2	NO	NO	NULL	96	0.135417
chr1	154921650	154921950	O31	17	195	chrSB:900-1100	Nmnat2	NO	NO	NULL	96	0.177083
chr1	154924050	154924350	O31	4	233	chrSB:900-1100	Nmnat2	NO	NO	NULL	96	0.0416667
chr1	164014050	164014350	O31	6	20	chrSB:900-1100	Dnm3	NO	NO	NULL	96	0.0625
chr1	164218950	164219250	O31	26	241	chrSB:900-1100	Dnm3	NO	NO	NULL	96	0.270833
chr1	164225550	164225850	O31	10	344	chrSB:900-1100	Dnm3	NO	NO	NULL	96	0.104167
chr1	164225850	164226150	O31	35	464	chrSB:900-1100	Dnm3	NO	NO	NULL	96	0.364583
chr1	188527350	188527650	O31	3	54	chrSB:900-1100	Tgfb2	NO	NO	NULL	96	0.03125
chr10	43018650	43018950	O31	4	28	chrSB:900-1100	Pdss2	NO	NO	NULL	96	0.0416667
chr10	83087250	83087550	O31	4	114	chrSB:900-1100	Appl2	NO	NO	NULL	96	0.0416667
chr10	98431350	98431650	O31	10	164	chrSB:900-1100	Atp2b1	YES	NO	NULL	96	0.104167
chr10	116515650	116515950	O31	3	42	chrSB:900-1100	Frs2	NO	NO	NULL	96	0.03125
chr11	4374450	4374750	O31	22	177	chrSB:900-1100	Mtmr3	NO	NO	NULL	96	0.229167
chr11	11860650	11860950	O31	6	83	chrSB:900-1100	Grb10	YES	NO	NULL	96	0.0625
chr11	11863050	11863350	O31	10	86	chrSB:900-1100	Grb10	YES	NO	NULL	96	0.104167
chr11	30085050	30085350	O31	45	238	chrSB:900-1100	Spnb2	YES	NO	NULL	96	0.46875
chr11	32813550	32813850	O31	4	98	chrSB:900-1100	RP23-94F11.5	YES	NO	NULL	96	0.0416667
chr11	32813850	32814150	O31	4	89	chrSB:900-1100	RP23-94F11.5	YES	NO	NULL	96	0.0416667
chr11	32819250	32819550	O31	4	46	chrSB:900-1100	RP23-94F11.5	YES	NO	NULL	96	0.0416667
chr11	32845650	32845950	O31	4	34	chrSB:900-1100	RP23-94F11.5	YES	NO	NULL	96	0.0416667
chr11	49081650	49081950	O31	3	9	chrSB:900-1100	Mgat1	YES	NO	NULL	96	0.03125
chr11	50421450	50421750	O31	5	108	chrSB:900-1100	Adamts2	YES	NO	NULL	96	0.0520833
chr11	50433750	50434050	O31	34	486	chrSB:900-1100	Adamts2	YES	NO	NULL	96	0.354167
chr11	103042050	103042350	O31	3	57	chrSB:900-1100	Fmnl1	NO	NO	NULL	96	0.03125
chr11	106975350	106975650	O31	12	140	chrSB:900-1100	Bptf	NO	NO	NULL	96	0.125
chr12	3099450	3099750	O31	9	67	chrSB:900-1100	AC159283.1	NO	NO	NULL	96	0.09375
chr12	82689750	82690050	O31	10	292	chrSB:900-1100	RP23-315C11.3	NO	NO	NULL	96	0.104167
chr12	82690050	82690350	O31	6	133	chrSB:900-1100	RP23-315C11.3	NO	NO	NULL	96	0.0625
chr12	82692150	82692450	O31	5	311	chrSB:900-1100	Med6	NO	NO	NULL	96	0.0520833
chr12	82771050	82771350	O31	3	172	chrSB:900-1100	Ttc9	NO	NO	NULL	96	0.03125
chr12	101680350	101680650	O31	3	87	chrSB:900-1100	Ttc7b	NO	NO	NULL	96	0.03125
chr12	103661550	103661850	O31	24	927	chrSB:900-1100	Lgmn	NO	NO	NULL	96	0.25
chr12	103696650	103696950	O31	8	27	chrSB:900-1100	Golga5	NO	NO	NULL	96	0.0833333
chr12	103700550	103700850	O31	4	121	chrSB:900-1100	Golga5	NO	NO	NULL	96	0.0416667
chr12	103701750	103702050	O31	4	45	chrSB:900-1100	Golga5	NO	NO	NULL	96	0.0416667
chr12	113900250	113900550	O31	64	1872	chrSB:900-1100	Akt1	YES	NO	NULL	96	0.666667
chr12	113909550	113909850	O31	40	861	chrSB:900-1100	Akt1	YES	NO	NULL	96	0.416667
chr13	3216150	3216450	O31	13	52	chrSB:900-1100	AC125190.1	NO	YES	NULL	96	0.135417
chr13	24562350	24562650	O31	10	480	chrSB:900-1100	Cmah	NO	NO	NULL	96	0.104167
chr13	24562650	24562950	O31	12	542	chrSB:900-1100	Cmah	NO	NO	NULL	96	0.125
chr13	29201550	29201850	O31	3	295	chrSB:900-1100	RP23-298D10.1	NO	NO	NULL	96	0.03125
chr13	29201850	29202150	O31	20	260	chrSB:900-1100	RP23-298D10.1	NO	NO	NULL	96	0.208333
chr13	29202150	29202450	O31	16	285	chrSB:900-1100	RP23-298D10.1	NO	NO	NULL	96	0.166667
chr13	36228150	36228450	O31	4	40	chrSB:900-1100	Fars2	NO	NO	NULL	96	0.0416667
chr13	36240150	36240450	O31	18	215	chrSB:900-1100	Fars2	NO	NO	NULL	96	0.1875
chr13	36256650	36256950	O31	4	187	chrSB:900-1100	Fars2	NO	NO	NULL	96	0.0416667
chr13	36433650	36433950	O31	3576	22209	chrSB:900-1100	Fars2	NO	NO	NULL	96	37.25
chr13	36433950	36434250	O31	430	11360	chrSB:900-1100	Fars2	NO	NO	NULL	96	4.47917
chr13	36628950	36629250	O31	414	26526	chrSB:900-1100	Fars2	NO	NO	NULL	96	4.3125
chr13	38951250	38951550	O31	3	3	chrSB:900-1100	7SK	NO	NO	NULL	96	0.03125
chr13	49393350	49393650	O31	3	35	chrSB:900-1100	Fgd3	YES	NO	NULL	96	0.03125
chr13	51820650	51820950	O31	45	378	chrSB:900-1100	Sema4d	YES	NO	NULL	96	0.46875
chr13	56776050	56776350	O31	17	178	chrSB:900-1100	Smad5	NO	NO	NULL	96	0.177083
chr13	56777850	56778150	O31	3	261	chrSB:900-1100	Smad5	NO	NO	NULL	96	0.03125
chr13	56780850	56781150	O31	69	1261	chrSB:900-1100	Smad5	NO	NO	NULL	96	0.71875
chr13	56788650	56788950	O31	7	27	chrSB:900-1100	Smad5	NO	NO	NULL	96	0.0729167
chr13	91076250	91076550	O31	3	229	chrSB:900-1100	Atg10	NO	NO	NULL	96	0.03125
chr13	91076850	91077150	O31	5	232	chrSB:900-1100	Atg10	NO	NO	NULL	96	0.0520833
chr13	91162050	91162350	O31	3	183	chrSB:900-1100	Atg10	NO	NO	NULL	96	0.03125
chr13	107786550	107786850	O31	3	83	chrSB:900-1100	Kif2a	NO	NO	NULL	96	0.03125
chr14	6119850	6120150	O31	4	4	chrSB:900-1100	Gm3095	NO	NO	NULL	96	0.0416667
chr14	7378950	7379250	O31	4	6	chrSB:900-1100	Gm3642	NO	NO	NULL	96	0.0416667
chr14	8347350	8347650	O31	4	4	chrSB:900-1100	Gm3558	NO	NO	NULL	96	0.0416667
chr14	20008350	20008650	O31	8	37	chrSB:900-1100	AC165092.1	NO	YES	NULL	96	0.0833333
chr14	20008650	20008950	O31	3	32	chrSB:900-1100	AC165092.1	NO	NO	NULL	96	0.03125
chr14	23415750	23416050	O31	23	444	chrSB:900-1100	1700112E06Rik	YES	NO	NULL	96	0.239583
chr14	23535450	23535750	O31	16	602	chrSB:900-1100	1700112E06Rik	YES	NO	NULL	96	0.166667
chr14	23547750	23548050	O31	7	562	chrSB:900-1100	1700112E06Rik	YES	NO	NULL	96	0.0729167
chr14	23616450	23616750	O31	9	574	chrSB:900-1100	1700112E06Rik	NO	NO	NULL	96	0.09375
chr14	23638650	23638950	O31	6	583	chrSB:900-1100	1700112E06Rik	NO	NO	NULL	96	0.0625
chr14	23638950	23639250	O31	52	890	chrSB:900-1100	1700112E06Rik	NO	NO	NULL	96	0.541667
chr14	23647650	23647950	O31	407	2363	chrSB:900-1100	1700112E06Rik	NO	NO	NULL	96	4.23958
chr14	23647950	23648250	O31	917	4919	chrSB:900-1100	1700112E06Rik	NO	NO	NULL	96	9.55208
chr14	23875050	23875350	O31	1164	7689	chrSB:900-1100	1700112E06Rik	NO	NO	NULL	96	12.125
chr14	73432050	73432350	O31	3	208	chrSB:900-1100	Cysltr2	NO	NO	NULL	96	0.03125
chr15	58792050	58792350	O31	14	177	chrSB:900-1100	Mtss1	YES	NO	NULL	96	0.145833
chr15	58793250	58793550	O31	7	415	chrSB:900-1100	Mtss1	YES	NO	NULL	96	0.0729167
chr15	58793550	58793850	O31	41	1161	chrSB:900-1100	Mtss1	YES	NO	NULL	96	0.427083
chr15	58793850	58794150	O31	26	2005	chrSB:900-1100	Mtss1	YES	NO	NULL	96	0.270833
chr15	95724750	95725050	O31	7	76	chrSB:900-1100	Ano6	YES	NO	NULL	96	0.0729167
chr16	13384350	13384650	O31	6	133	chrSB:900-1100	Mkl2	YES	NO	NULL	96	0.0625
chr17	3140850	3141150	O31	3	12	chrSB:900-1100	Rbm16	NO	NO	NULL	96	0.03125
chr17	13151550	13151850	O31	3	48	chrSB:900-1100	Acat2	NO	NO	NULL	96	0.03125
chr17	32420850	32421150	O31	6	26	chrSB:900-1100	Brd4	NO	NO	NULL	96	0.0625
chr17	36809550	36809850	O31	6	6	chrSB:900-1100	H2-M1	NO	NO	NULL	96	0.0625
chr17	39173550	39173850	O31	3	8	chrSB:900-1100	AC168268.1	NO	NO	NULL	96	0.03125
chr17	44102850	44103150	O31	5	50	chrSB:900-1100	Rcan2	YES	NO	NULL	96	0.0520833
chr17	44129850	44130150	O31	5	63	chrSB:900-1100	Rcan2	YES	NO	NULL	96	0.0520833
chr17	44139750	44140050	O31	12	191	chrSB:900-1100	Rcan2	YES	NO	NULL	96	0.125
chr17	44154750	44155050	O31	99	994	chrSB:900-1100	Rcan2	YES	NO	NULL	96	1.03125
chr17	68273550	68273850	O31	3	3	chrSB:900-1100	Arhgap28	NO	NO	NULL	96	0.03125
chr17	78808950	78809250	O31	10	649	chrSB:900-1100	Fez2	YES	NO	NULL	96	0.104167
chr17	84422250	84422550	O31	6	90	chrSB:900-1100	5S_rRNA	YES	NO	NULL	96	0.0625
chr17	84435150	84435450	O31	3	34	chrSB:900-1100	5S_rRNA	YES	NO	NULL	96	0.03125
chr17	84437250	84437550	O31	4	20	chrSB:900-1100	5S_rRNA	YES	NO	NULL	96	0.0416667
chr18	5036850	5037150	O31	4	13	chrSB:900-1100	Svil	YES	NO	NULL	96	0.0416667
chr18	34654650	34654950	O31	117	472	chrSB:900-1100	Fam13b	NO	YES	NULL	96	1.21875
chr18	35959350	35959650	O31	20	794	chrSB:900-1100	Cxxc5	YES	NO	NULL	96	0.208333
chr18	67721850	67722150	O31	3	3	chrSB:900-1100	Spire1	NO	NO	NULL	96	0.03125
chr18	73837350	73837650	O31	3	133	chrSB:900-1100	Smad4	NO	NO	NULL	96	0.03125
chr19	17430150	17430450	O31	99	526	chrSB:900-1100	Gcnt1	YES	NO	NULL	96	1.03125
chr19	22009350	22009650	O31	5	51	chrSB:900-1100	AC129205.1	YES	NO	NULL	96	0.0520833
chr19	22071450	22071750	O31	3	13	chrSB:900-1100	AC129205.1	NO	NO	NULL	96	0.03125
chr2	25861650	25861950	O31	3	261	chrSB:900-1100	Ubac1	YES	NO	NULL	96	0.03125
chr2	29728050	29728350	O31	73	710	chrSB:900-1100	Cercam	YES	NO	NULL	96	0.760417
chr2	44878350	44878650	O31	4	95	chrSB:900-1100	Zeb2	NO	NO	NULL	96	0.0416667
chr2	91321050	91321350	O31	4	351	chrSB:900-1100	Lrp4	NO	NO	NULL	96	0.0416667
chr2	91345350	91345650	O31	23	2001	chrSB:900-1100	Lrp4	NO	NO	NULL	96	0.239583
chr2	91345650	91345950	O31	45	3207	chrSB:900-1100	Lrp4	NO	NO	NULL	96	0.46875
chr2	117012750	117013050	O31	3	238	chrSB:900-1100	mmu-mir-674	NO	NO	NULL	96	0.03125
chr2	117013350	117013650	O31	5	194	chrSB:900-1100	mmu-mir-674	NO	NO	NULL	96	0.0520833
chr2	117037950	117038250	O31	4	34	chrSB:900-1100	mmu-mir-674	NO	NO	NULL	96	0.0416667
chr2	128126550	128126850	O31	6	493	chrSB:900-1100	RP23-249P4.1	NO	NO	NULL	96	0.0625
chr2	128156550	128156850	O31	41	648	chrSB:900-1100	RP23-249P4.1	NO	NO	NULL	96	0.427083
chr2	128163150	128163450	O31	10	111	chrSB:900-1100	RP23-249P4.1	NO	NO	NULL	96	0.104167
chr2	153087750	153088050	O31	3	183	chrSB:900-1100	Pofut1	NO	NO	NULL	96	0.03125
chr3	32381250	32381550	O31	3	19	chrSB:900-1100	Pik3ca	NO	NO	NULL	96	0.03125
chr3	37888950	37889250	O31	9	48	chrSB:900-1100	SNORA17	NO	NO	NULL	96	0.09375
chr3	86942250	86942550	O31	5	54	chrSB:900-1100	Kirrel	NO	NO	NULL	96	0.0520833
chr4	8674350	8674650	O31	83	1205	chrSB:900-1100	Chd7	YES	NO	NULL	96	0.864583
chr4	8697450	8697750	O31	79	479	chrSB:900-1100	Chd7	YES	NO	NULL	96	0.822917
chr4	8697750	8698050	O31	86	618	chrSB:900-1100	Chd7	YES	NO	NULL	96	0.895833
chr4	8704050	8704350	O31	3	97	chrSB:900-1100	Chd7	YES	NO	NULL	96	0.03125
chr4	19408950	19409250	O31	7	9	chrSB:900-1100	Cngb3	NO	NO	NULL	96	0.0729167
chr4	43908450	43908750	O31	6	115	chrSB:900-1100	Reck	YES	NO	NULL	96	0.0625
chr4	47418450	47418750	O31	11	112	chrSB:900-1100	Tgfbr1	YES	NO	NULL	96	0.114583
chr4	47419650	47419950	O31	13	212	chrSB:900-1100	Tgfbr1	YES	NO	NULL	96	0.135417
chr4	75892650	75892950	O31	4	182	chrSB:900-1100	Ptprd	NO	NO	NULL	96	0.0416667
chr4	75970950	75971250	O31	169	1823	chrSB:900-1100	Ptprd	YES	NO	NULL	96	1.76042
chr4	76392750	76393050	O31	43	220	chrSB:900-1100	Ptprd	NO	YES	NULL	96	0.447917
chr4	136129950	136130250	O31	3	166	chrSB:900-1100	Kdm1a	NO	NO	NULL	96	0.03125
chr4	149293050	149293350	O31	4	205	chrSB:900-1100	Spsb1	NO	NO	NULL	96	0.0416667
chr4	149841150	149841450	O31	10	430	chrSB:900-1100	Rere	NO	NO	NULL	96	0.104167
chr4	149844150	149844450	O31	58	452	chrSB:900-1100	Rere	NO	NO	NULL	96	0.604167
chr4	154945350	154945650	O31	6	82	chrSB:900-1100	Nadk	YES	NO	NULL	96	0.0625
chr5	3147450	3147750	O31	17	123	chrSB:900-1100	AC026478.1	NO	NO	NULL	96	0.177083
chr5	20391750	20392050	O31	12	251	chrSB:900-1100	Tmem60	YES	NO	NULL	96	0.125
chr5	20392050	20392350	O31	47	1378	chrSB:900-1100	Tmem60	YES	NO	NULL	96	0.489583
chr5	20439150	20439450	O31	51	321	chrSB:900-1100	Rsbn1l	YES	NO	NULL	96	0.53125
chr5	20439450	20439750	O31	17	196	chrSB:900-1100	Rsbn1l	YES	NO	NULL	96	0.177083
chr5	20443050	20443350	O31	5	65	chrSB:900-1100	Rsbn1l	YES	NO	NULL	96	0.0520833
chr5	20453850	20454150	O31	4	38	chrSB:900-1100	Rsbn1l	YES	NO	NULL	96	0.0416667
chr5	20456850	20457150	O31	6	71	chrSB:900-1100	Rsbn1l	YES	NO	NULL	96	0.0625
chr5	22996650	22996950	O31	3	85	chrSB:900-1100	Mll5	NO	NO	NULL	96	0.03125
chr5	23983950	23984250	O31	8	205	chrSB:900-1100	Agap3	NO	NO	NULL	96	0.0833333
chr5	24008550	24008850	O31	3	290	chrSB:900-1100	Gbx1	NO	NO	NULL	96	0.03125
chr5	54507150	54507450	O31	7	564	chrSB:900-1100	Stim2	YES	NO	NULL	96	0.0729167
chr5	54509250	54509550	O31	21	468	chrSB:900-1100	Stim2	YES	NO	NULL	96	0.21875
chr5	54509550	54509850	O31	218	3165	chrSB:900-1100	Stim2	YES	NO	NULL	96	2.27083
chr6	12383550	12383850	O31	63	313	chrSB:900-1100	Thsd7a	YES	YES	NULL	96	0.65625
chr6	12386850	12387150	O31	6	76	chrSB:900-1100	Thsd7a	YES	NO	NULL	96	0.0625
chr6	12427650	12427950	O31	5	119	chrSB:900-1100	Thsd7a	YES	NO	NULL	96	0.0520833
chr6	52028250	52028550	O31	4	178	chrSB:900-1100	RP23-103L13.1	NO	NO	NULL	96	0.0416667
chr6	52040550	52040850	O31	51	285	chrSB:900-1100	RP23-103L13.1	NO	NO	NULL	96	0.53125
chr6	52042050	52042350	O31	13	179	chrSB:900-1100	RP23-103L13.1	NO	NO	NULL	96	0.135417
chr6	52047150	52047450	O31	330	705	chrSB:900-1100	RP23-103L13.1	NO	YES	NULL	96	3.4375
chr6	80758950	80759250	O31	22	90	chrSB:900-1100	Lrrtm4	NO	YES	NULL	96	0.229167
chr6	83176050	83176350	O31	3	9	chrSB:900-1100	Slc4a5	NO	NO	NULL	96	0.03125
chr6	86025450	86025750	O31	8	94	chrSB:900-1100	Add2	NO	NO	NULL	96	0.0833333
chr6	100523550	100523850	O31	8	160	chrSB:900-1100	Shq1	NO	NO	NULL	96	0.0833333
chr6	100561650	100561950	O31	4	73	chrSB:900-1100	Shq1	NO	NO	NULL	96	0.0416667
chr6	125132250	125132550	O31	3	84	chrSB:900-1100	Ncapd2	NO	NO	NULL	96	0.03125
chr6	125134950	125135250	O31	250	2626	chrSB:900-1100	Ncapd2	NO	NO	NULL	96	2.60417
chr6	125142450	125142750	O31	391	8911	chrSB:900-1100	Mrpl51	NO	NO	NULL	96	4.07292
chr6	125143050	125143350	O31	133	10657	chrSB:900-1100	Mrpl51	NO	NO	NULL	96	1.38542
chr6	134436450	134436750	O31	17	83	chrSB:900-1100	Lrp6	NO	YES	NULL	96	0.177083
chr6	135327150	135327450	O31	4	308	chrSB:900-1100	Emp1	NO	NO	NULL	96	0.0416667
chr7	17208150	17208450	O31	3	56	chrSB:900-1100	U6	YES	NO	NULL	96	0.03125
chr7	17213850	17214150	O31	5	289	chrSB:900-1100	U6	YES	NO	NULL	96	0.0520833
chr7	27911250	27911550	O31	3	4	chrSB:900-1100	Cyp2f2	NO	NO	NULL	96	0.03125
chr7	52141050	52141350	O31	27	612	chrSB:900-1100	Med25	YES	NO	NULL	96	0.28125
chr7	52141350	52141650	O31	5	370	chrSB:900-1100	Med25	YES	NO	NULL	96	0.0520833
chr7	105330750	105331050	O31	3	182	chrSB:900-1100	AC119880.1	NO	NO	NULL	96	0.03125
chr7	135893550	135893850	O31	3	140	chrSB:900-1100	Sec23ip	NO	NO	NULL	96	0.03125
chr7	150970950	150971250	O31	8	16	chrSB:900-1100	Mrgpre	YES	NO	NULL	96	0.0833333
chr8	19759650	19759950	O31	3	207	chrSB:900-1100	AC148089.2	NO	NO	NULL	96	0.03125
chr8	19759950	19760250	O31	6	434	chrSB:900-1100	AC148089.2	NO	NO	NULL	96	0.0625
chr8	41584650	41584950	O31	4	321	chrSB:900-1100	Zdhhc2	NO	NO	NULL	96	0.0416667
chr8	54419250	54419550	O31	16	27	chrSB:900-1100	U7	NO	NO	NULL	96	0.166667
chr8	54421950	54422250	O31	16	26	chrSB:900-1100	U7	NO	NO	NULL	96	0.166667
chr8	71945550	71945850	O31	6	426	chrSB:900-1100	RNaseP_nuc	NO	NO	NULL	96	0.0625
chr8	72459750	72460050	O31	3	156	chrSB:900-1100	Gatad2a	NO	NO	NULL	96	0.03125
chr8	73693650	73693950	O31	11	157	chrSB:900-1100	AC161410.1	NO	NO	NULL	96	0.114583
chr8	74349750	74350050	O31	13	155	chrSB:900-1100	Zfp709	NO	NO	NULL	96	0.135417
chr8	87483450	87483750	O31	10	588	chrSB:900-1100	Rnaseh2a	NO	NO	NULL	96	0.104167
chr8	87884250	87884550	O31	59	714	chrSB:900-1100	Mylk3	YES	NO	NULL	96	0.614583
chr8	87909750	87910050	O31	28	347	chrSB:900-1100	Mylk3	YES	NO	NULL	96	0.291667
chr8	87910050	87910350	O31	18	545	chrSB:900-1100	Mylk3	YES	NO	NULL	96	0.1875
chr8	87916050	87916350	O31	18	350	chrSB:900-1100	Mylk3	YES	NO	NULL	96	0.1875
chr8	87922650	87922950	O31	10	225	chrSB:900-1100	4921524J17Rik	YES	NO	NULL	96	0.104167
chr8	122210550	122210850	O31	6	104	chrSB:900-1100	Wfdc1	NO	NO	NULL	96	0.0625
chr9	45863850	45864150	O31	4	201	chrSB:900-1100	Sik3	NO	NO	NULL	96	0.0416667
chr9	45864150	45864450	O31	9	71	chrSB:900-1100	Sik3	NO	NO	NULL	96	0.09375
chr9	63392550	63392850	O31	10	64	chrSB:900-1100	Iqch	NO	NO	NULL	96	0.104167
chr9	66312450	66312750	O31	7	36	chrSB:900-1100	Herc1	NO	YES	NULL	96	0.0729167
chr9	66313050	66313350	O31	14	159	chrSB:900-1100	Herc1	NO	NO	NULL	96	0.145833
chr9	70133850	70134150	O31	72	377	chrSB:900-1100	Myo1e	YES	YES	NULL	96	0.75
chr9	70134150	70134450	O31	20	591	chrSB:900-1100	Myo1e	YES	NO	NULL	96	0.208333
chr9	70138050	70138350	O31	37	1411	chrSB:900-1100	Myo1e	YES	NO	NULL	96	0.385417
chr9	110476050	110476350	O31	24	320	chrSB:900-1100	Setd2	NO	NO	NULL	96	0.25
chr9	122596350	122596650	O31	5	36	chrSB:900-1100	mmu-mir-138-1	NO	NO	NULL	96	0.0520833
chr9	122659350	122659650	O31	4	26	chrSB:900-1100	D9Ertd402e	NO	NO	NULL	96	0.0416667
chrX	7497750	7498050	O31	59	1012	chrSB:900-1100	Pcsk1n	YES	NO	NULL	96	0.614583
chrX	7501950	7502250	O31	617	8148	chrSB:900-1100	Eras	YES	NO	NULL	96	6.42708
chrX	7502250	7502550	O31	38	1640	chrSB:900-1100	Eras	YES	NO	NULL	96	0.395833
chrX	71482050	71482350	O31	150	2709	chrSB:900-1100	Flna	YES	NO	NULL	96	1.5625
chrX	71482350	71482650	O31	97	914	chrSB:900-1100	Flna	YES	NO	NULL	96	1.01042
chrX	148700850	148701150	O31	4	267	chrSB:900-1100	Kdm5c	YES	NO	NULL	96	0.0416667
chrX	148701150	148701450	O31	4	376	chrSB:900-1100	Kdm5c	YES	NO	NULL	96	0.0416667
chrX	148804350	148804650	O31	4	44	chrSB:900-1100	RP23-147K15.3	NO	NO	NULL	96	0.0416667
chrX	148850850	148851150	O31	6	429	chrSB:900-1100	RP23-147K15.3	NO	NO	NULL	96	0.0625
chr10	9497850	9498150	O31	3	82	chrSB:2000-2200	Stxbp5	NO	NO	NULL	96	0.03125
chr10	106106250	106106550	O31	6	6	chrSB:2000-2200	Ppfia2	NO	NO	NULL	96	0.0625
chr11	30084750	30085050	O31	4	18	chrSB:2000-2200	Spnb2	YES	NO	NULL	96	0.0416667
chr11	96974550	96974850	O31	3	16	chrSB:2000-2200	Tbx21	NO	NO	NULL	96	0.03125
chr13	29239950	29240250	O31	3	9	chrSB:2000-2200	RP23-298D10.1	NO	NO	NULL	96	0.03125
chr13	41432250	41432550	O31	4	22	chrSB:2000-2200	Nedd9	NO	NO	NULL	96	0.0416667
chr13	56773650	56773950	O31	4	50	chrSB:2000-2200	Smad5	NO	NO	NULL	96	0.0416667
chr14	63510750	63511050	O31	5	5	chrSB:2000-2200	Wdfy2	NO	NO	NULL	96	0.0520833
chr15	58791450	58791750	O31	12	54	chrSB:2000-2200	Mtss1	YES	YES	NULL	96	0.125
chr15	58791750	58792050	O31	4	71	chrSB:2000-2200	Mtss1	YES	NO	NULL	96	0.0416667
chr15	81227850	81228150	O31	6	164	chrSB:2000-2200	St13	NO	NO	NULL	96	0.0625
chr15	95671350	95671650	O31	7	33	chrSB:2000-2200	Ano6	YES	YES	NULL	96	0.0729167
chr16	31666950	31667250	O31	8	40	chrSB:2000-2200	Dlg1	NO	YES	NULL	96	0.0833333
chr16	52078350	52078650	O31	3	12	chrSB:2000-2200	Cblb	NO	NO	NULL	96	0.03125
chr17	78774450	78774750	O31	16	132	chrSB:2000-2200	Crim1	YES	NO	NULL	96	0.166667
chr17	78774750	78775050	O31	9	243	chrSB:2000-2200	Crim1	YES	NO	NULL	96	0.09375
chr19	32852250	32852550	O31	9	154	chrSB:2000-2200	Pten	YES	NO	NULL	96	0.09375
chr2	25812450	25812750	O31	6	35	chrSB:2000-2200	Camsap1	NO	NO	NULL	96	0.0625
chr2	29727750	29728050	O31	24	183	chrSB:2000-2200	Cercam	NO	NO	NULL	96	0.25
chr2	91350150	91350450	O31	6	361	chrSB:2000-2200	Lrp4	NO	NO	NULL	96	0.0625
chr2	91350450	91350750	O31	13	299	chrSB:2000-2200	Lrp4	NO	NO	NULL	96	0.135417
chr3	97622250	97622550	O31	3	10	chrSB:2000-2200	Pde4dip	NO	NO	NULL	96	0.03125
chr3	97710450	97710750	O31	4	139	chrSB:2000-2200	Sec22b	YES	NO	NULL	96	0.0416667
chr4	47418150	47418450	O31	3	62	chrSB:2000-2200	Tgfbr1	NO	NO	NULL	96	0.03125
chr4	75934050	75934350	O31	15	130	chrSB:2000-2200	Ptprd	YES	NO	NULL	96	0.15625
chr4	75934350	75934650	O31	15	177	chrSB:2000-2200	Ptprd	YES	NO	NULL	96	0.15625
chr4	88923450	88923750	O31	8	614	chrSB:2000-2200	Cdkn2a	YES	NO	NULL	96	0.0833333
chr4	141076350	141076650	O31	7	34	chrSB:2000-2200	Spen	NO	YES	NULL	96	0.0729167
chr4	149844150	149844450	O31	18	452	chrSB:2000-2200	Rere	NO	NO	NULL	96	0.1875
chr4	154982250	154982550	O31	6	20	chrSB:2000-2200	Slc35e2	YES	NO	NULL	96	0.0625
chr5	24008850	24009150	O31	7	475	chrSB:2000-2200	Gbx1	NO	NO	NULL	96	0.0729167
chr5	24009150	24009450	O31	74	221	chrSB:2000-2200	Gbx1	NO	YES	NULL	96	0.770833
chr5	54509250	54509550	O31	24	468	chrSB:2000-2200	Stim2	YES	NO	NULL	96	0.25
chr5	134764950	134765250	O31	4	84	chrSB:2000-2200	Gtf2i	NO	NO	NULL	96	0.0416667
chr5	143830050	143830350	O31	47	172	chrSB:2000-2200	Rnf216	YES	YES	NULL	96	0.489583
chr5	143830350	143830650	O31	9	573	chrSB:2000-2200	Rnf216	YES	NO	NULL	96	0.09375
chr6	125131650	125131950	O31	4	9	chrSB:2000-2200	Ncapd2	NO	NO	NULL	96	0.0416667
chr9	70152150	70152450	O31	9	126	chrSB:2000-2200	Myo1e	YES	NO	NULL	96	0.09375
chr9	70152450	70152750	O31	9	38	chrSB:2000-2200	Myo1e	YES	YES	NULL	96	0.09375
chrX	7504050	7504350	O31	5	143	chrSB:2000-2200	Eras	YES	NO	NULL	96	0.0520833
chrX	71482050	71482350	O31	63	2709	chrSB:2000-2200	Flna	YES	NO	NULL	96	0.65625
chrX	71482350	71482650	O31	77	914	chrSB:2000-2200	Flna	YES	NO	NULL	96	0.802083
chrX	139419750	139420050	O31	3	5	chrSB:2000-2200	Ammecr1	NO	NO	NULL	96	0.03125
chrX	148694250	148694550	O31	8	83	chrSB:2000-2200	Kdm5c	YES	NO	NULL	96	0.0833333
chrX	157601850	157602150	O31	4	6	chrSB:2000-2200	Scml2	YES	NO	NULL	96	0.0416667
chr9	78311850	78312150	O374-1	3	53	chrSB:0-200	Mto1	YES	NO	YES	31	0.0967742
chr4	58859850	58860150	O374-1	120	351	chrSB:450-650	AI314180	NO	YES	YES	31	3.87097
chr5	30477450	30477750	O374-1	3	56	chrSB:450-650	Hadha	YES	NO	YES	31	0.0967742
chr5	30481350	30481650	O374-1	4	142	chrSB:450-650	Hadha	YES	NO	YES	31	0.129032
chr7	137311050	137311350	O374-1	526	1173	chrSB:450-650	Fgfr2	YES	YES	YES	31	16.9677
chr7	137313150	137313450	O374-1	20	1877	chrSB:450-650	Fgfr2	YES	NO	YES	31	0.645161
chr9	78308550	78308850	O374-1	30	587	chrSB:450-650	Mto1	YES	NO	YES	31	0.967742
chr9	78309150	78309450	O374-1	31	240	chrSB:450-650	Mto1	YES	NO	YES	31	1
chr10	60773550	60773850	O374-1	11	52	chrSB:900-1100	AC151895.1	YES	YES	YES	31	0.354839
chr11	61172850	61173150	O374-1	3	78	chrSB:900-1100	Slc47a1	NO	NO	NULL	31	0.0967742
chr15	12387750	12388050	O374-1	4	63	chrSB:900-1100	Pdzd2	NO	NO	YES	31	0.129032
chr15	32024250	32024550	O374-1	21	84	chrSB:900-1100	Tas2r119	NO	YES	YES	31	0.677419
chr15	32026350	32026650	O374-1	3	89	chrSB:900-1100	Tas2r119	NO	NO	YES	31	0.0967742
chr15	32044950	32045250	O374-1	4	114	chrSB:900-1100	Tas2r119	NO	NO	YES	31	0.129032
chr15	32052450	32052750	O374-1	364	1667	chrSB:900-1100	Tas2r119	NO	YES	YES	31	11.7419
chr15	32058750	32059050	O374-1	420	3834	chrSB:900-1100	Tas2r119	NO	NO	YES	31	13.5484
chr15	32082750	32083050	O374-1	3	103	chrSB:900-1100	Tas2r119	NO	NO	YES	31	0.0967742
chr15	32095050	32095350	O374-1	21	275	chrSB:900-1100	Tas2r119	NO	NO	YES	31	0.677419
chr15	32167950	32168250	O374-1	3	90	chrSB:900-1100	SNORD123	NO	NO	YES	31	0.0967742
chr15	32212650	32212950	O374-1	4	61	chrSB:900-1100	Sema5a	NO	NO	YES	31	0.129032
chr15	32224050	32224350	O374-1	77	590	chrSB:900-1100	Sema5a	NO	NO	YES	31	2.48387
chr15	36189750	36190050	O374-1	31	383	chrSB:900-1100	Rnf19a	NO	NO	NULL	31	1
chr15	61783350	61783650	O374-1	91	460	chrSB:900-1100	Myc	NO	YES	YES	31	2.93548
chr15	61783650	61783950	O374-1	10	207	chrSB:900-1100	Myc	NO	NO	YES	31	0.322581
chr15	61819050	61819350	O374-1	916	6419	chrSB:900-1100	Myc	NO	NO	YES	31	29.5484
chr15	62590950	62591250	O374-1	4	360	chrSB:900-1100	SNORA17	NO	NO	YES	31	0.129032
chr15	62593650	62593950	O374-1	24	419	chrSB:900-1100	SNORA17	NO	NO	YES	31	0.774194
chr15	62603850	62604150	O374-1	17	42	chrSB:900-1100	SNORA17	NO	YES	YES	31	0.548387
chr15	101967150	101967450	O374-1	4	31	chrSB:900-1100	Spryd3	NO	NO	YES	31	0.129032
chr17	7583550	7583850	O374-1	410	1871	chrSB:900-1100	Gm9992	NO	YES	NULL	31	13.2258
chr17	13318350	13318650	O374-1	56	868	chrSB:900-1100	Unc93a	NO	NO	NULL	31	1.80645
chr17	13318650	13318950	O374-1	5	131	chrSB:900-1100	Unc93a	NO	NO	NULL	31	0.16129
chr17	13597050	13597350	O374-1	4	50	chrSB:900-1100	AC166110.2	NO	NO	NULL	31	0.129032
chr18	34654650	34654950	O374-1	7	31	chrSB:900-1100	Fam13b	YES	YES	YES	31	0.225806
chr5	30471750	30472050	O374-1	181	2681	chrSB:900-1100	Hadha	YES	NO	YES	31	5.83871
chr5	30473250	30473550	O374-1	12	692	chrSB:900-1100	Hadha	YES	NO	YES	31	0.387097
chr5	30473850	30474150	O374-1	183	1130	chrSB:900-1100	Hadha	YES	NO	YES	31	5.90323
chr6	84099450	84099750	O374-1	14	126	chrSB:900-1100	Dysf	NO	NO	YES	31	0.451613
chr6	84099750	84100050	O374-1	15	269	chrSB:900-1100	Dysf	NO	NO	YES	31	0.483871
chr6	88247850	88248150	O374-1	4	116	chrSB:900-1100	Eefsec	NO	NO	NULL	31	0.129032
chr7	125989350	125989650	O374-1	7	629	chrSB:900-1100	2310008H09Rik	YES	NO	YES	31	0.225806
chr7	125991750	125992050	O374-1	18	346	chrSB:900-1100	2310008H09Rik	YES	NO	YES	31	0.580645
chr7	125996550	125996850	O374-1	6	436	chrSB:900-1100	2310008H09Rik	YES	NO	YES	31	0.193548
chr7	137307450	137307750	O374-1	124	1056	chrSB:900-1100	Fgfr2	YES	NO	YES	31	4
chr9	78312450	78312750	O374-1	46	234	chrSB:900-1100	Mto1	YES	YES	YES	31	1.48387
chr9	78312750	78313050	O374-1	144	599	chrSB:900-1100	Mto1	YES	YES	YES	31	4.64516
chr10	60773550	60773850	O374-1	3	52	chrSB:1400-1600	AC151895.1	YES	NO	YES	31	0.0967742
chr15	12387750	12388050	O374-1	3	63	chrSB:1400-1600	Pdzd2	NO	NO	YES	31	0.0967742
chr15	12858450	12858750	O374-1	4	348	chrSB:1400-1600	Rnasen	NO	NO	YES	31	0.129032
chr15	32052450	32052750	O374-1	54	1667	chrSB:1400-1600	Tas2r119	NO	NO	YES	31	1.74194
chr15	32058750	32059050	O374-1	86	3834	chrSB:1400-1600	Tas2r119	NO	NO	YES	31	2.77419
chr15	32167950	32168250	O374-1	3	90	chrSB:1400-1600	SNORD123	NO	NO	YES	31	0.0967742
chr15	32174850	32175150	O374-1	19	278	chrSB:1400-1600	Sema5a	NO	NO	YES	31	0.612903
chr15	32187750	32188050	O374-1	3	158	chrSB:1400-1600	Sema5a	NO	NO	YES	31	0.0967742
chr15	32199150	32199450	O374-1	3	94	chrSB:1400-1600	Sema5a	NO	NO	YES	31	0.0967742
chr15	32199450	32199750	O374-1	10	147	chrSB:1400-1600	Sema5a	NO	NO	YES	31	0.322581
chr15	32200950	32201250	O374-1	17	125	chrSB:1400-1600	Sema5a	NO	NO	YES	31	0.548387
chr15	32203350	32203650	O374-1	3	47	chrSB:1400-1600	Sema5a	NO	NO	YES	31	0.0967742
chr15	32212350	32212650	O374-1	3	60	chrSB:1400-1600	Sema5a	NO	NO	YES	31	0.0967742
chr15	32224050	32224350	O374-1	21	590	chrSB:1400-1600	Sema5a	NO	NO	YES	31	0.677419
chr15	61819050	61819350	O374-1	136	6419	chrSB:1400-1600	Myc	NO	NO	YES	31	4.3871
chr15	61869450	61869750	O374-1	10	86	chrSB:1400-1600	Pvt1	NO	NO	YES	31	0.322581
chr15	62593650	62593950	O374-1	5	419	chrSB:1400-1600	SNORA17	NO	NO	YES	31	0.16129
chr15	62603850	62604150	O374-1	4	42	chrSB:1400-1600	SNORA17	NO	NO	YES	31	0.129032
chr18	34621650	34621950	O374-1	10	114	chrSB:1400-1600	Fam13b	YES	NO	YES	31	0.322581
chr5	33988050	33988350	O374-1	96	553	chrSB:1400-1600	Slbp	YES	NO	YES	31	3.09677
chr5	116015250	116015550	O374-1	3	17	chrSB:1400-1600	Gcn1l1	NO	NO	NULL	31	0.0967742
chr6	84099450	84099750	O374-1	3	126	chrSB:1400-1600	Dysf	NO	NO	YES	31	0.0967742
chr7	125999250	125999550	O374-1	3	34	chrSB:1400-1600	Iqck	YES	NO	YES	31	0.0967742
chr9	37477050	37477350	O374-1	5	6	chrSB:1400-1600	Panx3	YES	NO	YES	31	0.16129
chr9	37477350	37477650	O374-1	3	17	chrSB:1400-1600	Panx3	YES	NO	YES	31	0.0967742
chr9	78312450	78312750	O374-1	5	234	chrSB:1400-1600	Mto1	YES	NO	YES	31	0.16129
chr9	78312750	78313050	O374-1	32	599	chrSB:1400-1600	Mto1	YES	NO	YES	31	1.03226
chr15	32227050	32227350	O374-1	15	175	chrSB:2000-2200	Sema5a	NO	NO	YES	31	0.483871
chr15	32227350	32227650	O374-1	20	61	chrSB:2000-2200	Sema5a	NO	YES	YES	31	0.645161
chr15	61816650	61816950	O374-1	46	150	chrSB:2000-2200	Myc	NO	YES	YES	31	1.48387
chr7	137310150	137310450	O374-1	5	139	chrSB:2000-2200	Fgfr2	YES	NO	YES	31	0.16129
chr9	37479150	37479450	O374-1	4	6	chrSB:2000-2200	Panx3	YES	NO	YES	31	0.129032
chr9	78311850	78312150	O374-1	3	53	chrSB:2000-2200	Mto1	YES	NO	YES	31	0.0967742
chr1	133228650	133228950	O380	4	87	chrSB:450-650	Srgap2	NO	NO	YES	20	0.2
chr1	133230450	133230750	O380	3	82	chrSB:450-650	Srgap2	NO	NO	YES	20	0.15
chr1	133232850	133233150	O380	4	135	chrSB:450-650	Srgap2	NO	NO	YES	20	0.2
chr11	85027650	85027950	O380	4	52	chrSB:450-650	Appbp2	NO	NO	NULL	20	0.2
chr15	12312150	12312450	O380	3	26	chrSB:450-650	Pdzd2	NO	NO	NULL	20	0.15
chr3	95252250	95252550	O380	4	99	chrSB:450-650	Arnt	NO	NO	NULL	20	0.2
chrY	576150	576450	O380	8	29	chrSB:450-650	BADrepeat	NO	NO	NULL	20	0.4
chr1	93134550	93134850	O380	3	39	chrSB:900-1100	AC102874.1	NO	NO	NULL	20	0.15
chr1	93134850	93135150	O380	16	28	chrSB:900-1100	AC102874.1	NO	NO	NULL	20	0.8
chr11	109226850	109227150	O380	7	193	chrSB:900-1100	Gna13	NO	NO	NULL	20	0.35
chr13	54567450	54567750	O380	5	149	chrSB:900-1100	Thoc3	YES	NO	NULL	20	0.25
chr15	53293350	53293650	O380	5	78	chrSB:900-1100	Samd12	NO	NO	NULL	20	0.25
chr15	53293650	53293950	O380	3	33	chrSB:900-1100	Samd12	NO	NO	NULL	20	0.15
chr15	59423550	59423850	O380	37	367	chrSB:900-1100	Nsmce2	NO	NO	NULL	20	1.85
chr16	42955950	42956250	O380	32	498	chrSB:900-1100	Zbtb20	NO	NO	NULL	20	1.6
chr17	28423050	28423350	O380	7	148	chrSB:900-1100	Ppard	NO	NO	NULL	20	0.35
chr18	61265250	61265550	O380	5	180	chrSB:900-1100	Csf1r	NO	NO	NULL	20	0.25
chr18	61265550	61265850	O380	5	369	chrSB:900-1100	Csf1r	NO	NO	NULL	20	0.25
chr18	61269150	61269450	O380	12	907	chrSB:900-1100	Csf1r	NO	NO	NULL	20	0.6
chr4	20209950	20210250	O380	3	15	chrSB:900-1100	Nkain3	NO	NO	NULL	20	0.15
chr4	32455350	32455650	O380	9	61	chrSB:900-1100	Bach2	NO	NO	NULL	20	0.45
chr4	43417650	43417950	O380	4	71	chrSB:900-1100	Rusc2	NO	NO	NULL	20	0.2
chr4	75727950	75728250	O380	6	84	chrSB:900-1100	Ptprd	NO	NO	NULL	20	0.3
chr4	123389850	123390150	O380	32	609	chrSB:900-1100	Ndufs5	NO	NO	NULL	20	1.6
chr4	129516150	129516450	O380	11	598	chrSB:900-1100	Ptp4a2	NO	NO	NULL	20	0.55
chr8	108399450	108399750	O380	7	405	chrSB:900-1100	Nutf2	NO	NO	NULL	20	0.35
chr11	4718250	4718550	O380	12	61	chrSB:1400-1600	Nf2	YES	YES	YES	20	0.6
chr11	4718550	4718850	O380	14	119	chrSB:1400-1600	Nf2	YES	NO	YES	20	0.7
chr11	86570550	86570850	O380	6	197	chrSB:1400-1600	Cltc	NO	NO	NULL	20	0.3
chr11	97352250	97352550	O380	3	99	chrSB:1400-1600	RP23-157O10.6	NO	NO	NULL	20	0.15
chr13	20541150	20541450	O380	3	103	chrSB:1400-1600	Elmo1	NO	NO	NULL	20	0.15
chr15	72953550	72953850	O380	7	50	chrSB:1400-1600	Eif2c2	NO	NO	NULL	20	0.35
chr15	102348750	102349050	O380	3	134	chrSB:1400-1600	Tarbp2	NO	NO	YES	20	0.15
chr15	102350850	102351150	O380	10	233	chrSB:1400-1600	Tarbp2	NO	NO	YES	20	0.5
chr15	102351450	102351750	O380	13	172	chrSB:1400-1600	Tarbp2	NO	NO	YES	20	0.65
chr17	63230250	63230550	O380	5	62	chrSB:1400-1600	Efna5	NO	NO	NULL	20	0.25
chr5	113591850	113592150	O380	4	56	chrSB:1400-1600	2900026A02Rik	YES	NO	YES	20	0.2
chr5	113592150	113592450	O380	3	62	chrSB:1400-1600	2900026A02Rik	YES	NO	YES	20	0.15
chr5	115777050	115777350	O380	16	362	chrSB:1400-1600	Sfrs9	NO	NO	YES	20	0.8
chr5	115777350	115777650	O380	74	596	chrSB:1400-1600	Sfrs9	NO	NO	YES	20	3.7
chr5	115778550	115778850	O380	5	136	chrSB:1400-1600	Sfrs9	NO	NO	YES	20	0.25
chr7	125295750	125296050	O380	3	119	chrSB:1400-1600	Smg1	NO	NO	NULL	20	0.15
chr8	26113650	26113950	O380	9	118	chrSB:1400-1600	Adam9	YES	NO	YES	20	0.45
chr8	26115150	26115450	O380	6	132	chrSB:1400-1600	Adam9	YES	NO	YES	20	0.3
chr9	13553550	13553850	O380	3	74	chrSB:1400-1600	Mtmr2	NO	NO	NULL	20	0.15
chr9	13586550	13586850	O380	4	69	chrSB:1400-1600	Mtmr2	NO	NO	NULL	20	0.2
chr9	58471350	58471650	O380	242	3484	chrSB:1400-1600	Nptn	YES	NO	YES	20	12.1
chr9	58471650	58471950	O380	27	1019	chrSB:1400-1600	Nptn	YES	NO	YES	20	1.35
chr9	58475550	58475850	O380	220	1585	chrSB:1400-1600	Nptn	YES	NO	YES	20	11
chr15	66722850	66723150	O417	872	2280	chrSB:1400-1600	Wisp1	NO	YES	NULL	54	16.1481
chr8	87550950	87551250	O417	260	2842	chrSB:1400-1600	2310036O22Rik	YES	NO	NULL	54	4.81481
chr15	63951450	63951750	O417	144	1308	chrSB:450-650	Asap1	NO	NO	NULL	54	2.66667
chr5	103905750	103906050	O417	144	452	chrSB:450-650	Ptpn13	YES	YES	NULL	54	2.66667
chr5	103906050	103906350	O417	121	427	chrSB:450-650	Ptpn13	YES	YES	NULL	54	2.24074
chr8	73419150	73419450	O417	64	5946	chrSB:450-650	Rpl18a	NO	NO	NULL	54	1.18519
chr11	4718550	4718850	O417	60	241	chrSB:450-650	Nf2	YES	YES	NULL	54	1.11111
chr9	34859850	34860150	O417	47	417	chrSB:450-650	St3gal4	NO	NO	NULL	54	0.87037
chr9	108430950	108431250	O417	43	476	chrSB:450-650	Qrich1	YES	NO	NULL	54	0.796296
chr9	110076150	110076450	O417	41	256	chrSB:450-650	Smarcc1	NO	NO	NULL	54	0.759259
chr11	78887850	78888150	O417	41	129	chrSB:1400-1600	Ksr1	YES	YES	NULL	54	0.759259
chr1	74393850	74394150	O417	39	309	chrSB:900-1100	Pnkd	NO	NO	NULL	54	0.722222
chr15	96202950	96203250	O417	27	312	chrSB:450-650	Arid2	YES	NO	NULL	54	0.5
chr9	110073450	110073750	O417	23	345	chrSB:450-650	Smarcc1	NO	NO	NULL	54	0.425926
chr8	105171150	105171450	O417	23	1399	chrSB:1400-1600	Cdh11	NO	NO	NULL	54	0.425926
chr11	4718250	4718550	O417	22	100	chrSB:450-650	Nf2	YES	YES	NULL	54	0.407407
chr8	73418550	73418850	O417	21	111	chrSB:0-200	Rpl18a	NO	NO	NULL	54	0.388889
chr15	66723150	66723450	O417	21	960	chrSB:1400-1600	Wisp1	NO	NO	NULL	54	0.388889
chr18	31871250	31871550	O417	16	183	chrSB:450-650	Sap130	YES	NO	NULL	54	0.296296
chr10	50487150	50487450	O417	15	157	chrSB:450-650	Ascc3	YES	NO	NULL	54	0.277778
chr3	123039150	123039450	O417	12	265	chrSB:450-650	Sec24d	YES	NO	NULL	54	0.222222
chr11	84151950	84152250	O417	12	138	chrSB:1400-1600	Acaca	NO	NO	NULL	54	0.222222
chr9	82768650	82768950	O417	10	75	chrSB:450-650	Phip	NO	NO	NULL	54	0.185185
chr15	43323750	43324050	O417	10	299	chrSB:900-1100	Ttc35	YES	NO	NULL	54	0.185185
chr12	60238650	60238950	O417	10	278	chrSB:1400-1600	Ctage5	NO	NO	NULL	54	0.185185
chr11	84151650	84151950	O417	9	156	chrSB:1400-1600	Acaca	NO	NO	NULL	54	0.166667
chr4	33455550	33455850	O417	9	109	chrSB:1400-1600	Rngtt	NO	NO	NULL	54	0.166667
chr5	151445550	151445850	O417	9	412	chrSB:1400-1600	N4bp2l2	YES	NO	NULL	54	0.166667
chr13	55127550	55127850	O417	9	20	chrSB:2000-2200	Uimc1	YES	NO	NULL	54	0.166667
chr9	34858950	34859250	O417	8	81	chrSB:0-200	St3gal4	NO	NO	NULL	54	0.148148
chr18	31858350	31858650	O417	8	248	chrSB:450-650	Sap130	YES	NO	NULL	54	0.148148
chr9	34859550	34859850	O417	7	164	chrSB:450-650	St3gal4	NO	NO	NULL	54	0.12963
chr19	38956950	38957250	O417	7	96	chrSB:1400-1600	Tbc1d12	NO	NO	NULL	54	0.12963
chr18	31813050	31813350	O417	6	74	chrSB:450-650	Sap130	YES	NO	NULL	54	0.111111
chr3	123039450	123039750	O417	6	426	chrSB:450-650	Sec24d	YES	NO	NULL	54	0.111111
chr15	43277250	43277550	O417	6	24	chrSB:900-1100	Gm10373	YES	NO	NULL	54	0.111111
chr17	63574350	63574650	O417	6	164	chrSB:1400-1600	Fbxl17	YES	NO	NULL	54	0.111111
chr4	33466350	33466650	O417	6	74	chrSB:1400-1600	Rngtt	NO	NO	NULL	54	0.111111
chr1	74394150	74394450	O417	5	363	chrSB:900-1100	Pnkd	NO	NO	NULL	54	0.0925926
chr11	106092450	106092750	O417	5	141	chrSB:1400-1600	Ddx42	NO	NO	NULL	54	0.0925926
chr19	38970450	38970750	O417	5	54	chrSB:1400-1600	Tbc1d12	NO	NO	NULL	54	0.0925926
chr6	146836950	146837250	O417	5	151	chrSB:1400-1600	Ppfibp1	YES	NO	NULL	54	0.0925926
chr1	74393250	74393550	O417	5	51	chrSB:2000-2200	Pnkd	NO	NO	NULL	54	0.0925926
chr9	108433950	108434250	O417	4	58	chrSB:0-200	Qrich1	YES	NO	NULL	54	0.0740741
chr1	196475550	196475850	O417	4	78	chrSB:450-650	Plxna2	NO	NO	NULL	54	0.0740741
chr10	50486850	50487150	O417	4	140	chrSB:450-650	Ascc3	YES	NO	NULL	54	0.0740741
chr18	31870950	31871250	O417	4	219	chrSB:450-650	Sap130	YES	NO	NULL	54	0.0740741
chr9	59722950	59723250	O417	4	53	chrSB:450-650	Myo9a	YES	NO	NULL	54	0.0740741
chr9	82768950	82769250	O417	4	145	chrSB:450-650	Phip	NO	NO	NULL	54	0.0740741
chr9	110076450	110076750	O417	4	175	chrSB:450-650	Smarcc1	NO	NO	NULL	54	0.0740741
chr1	74393850	74394150	O417	4	309	chrSB:1400-1600	Pnkd	NO	NO	NULL	54	0.0740741
chr11	77255250	77255550	O417	4	56	chrSB:1400-1600	Ssh2	NO	NO	NULL	54	0.0740741
chr15	66969450	66969750	O417	3	73	chrSB:0-200	St3gal1	NO	NO	NULL	54	0.0555556
chr3	61173450	61173750	O417	3	11	chrSB:0-200	Rap2b	YES	NO	NULL	54	0.0555556
chr10	61903650	61903950	O417	3	84	chrSB:450-650	Supv3l1	NO	NO	NULL	54	0.0555556
chr3	38890350	38890650	O417	3	36	chrSB:450-650	Fat4	NO	NO	NULL	54	0.0555556
chr15	43225950	43226250	O417	3	22	chrSB:900-1100	AC099621.1	YES	NO	NULL	54	0.0555556
chr15	43274850	43275150	O417	3	18	chrSB:900-1100	Gm10373	YES	NO	NULL	54	0.0555556
chr15	43323450	43323750	O417	3	160	chrSB:900-1100	Ttc35	YES	NO	NULL	54	0.0555556
chr10	8470950	8471250	O417	3	182	chrSB:1400-1600	Sash1	NO	NO	NULL	54	0.0555556
chr11	106093950	106094250	O417	3	111	chrSB:1400-1600	Ddx42	NO	NO	NULL	54	0.0555556
chr12	60236850	60237150	O417	3	238	chrSB:1400-1600	Ctage5	NO	NO	NULL	54	0.0555556
chr12	60237150	60237450	O417	3	196	chrSB:1400-1600	Ctage5	NO	NO	NULL	54	0.0555556
chr13	51234750	51235050	O417	3	287	chrSB:1400-1600	Spin1	NO	NO	NULL	54	0.0555556
chr15	34429050	34429350	O417	3	37	chrSB:1400-1600	Pop1	NO	NO	NULL	54	0.0555556
chr15	66727050	66727350	O417	3	119	chrSB:1400-1600	Wisp1	NO	NO	NULL	54	0.0555556
chr4	141278850	141279150	O417	3	129	chrSB:1400-1600	Rsc1a1	NO	NO	NULL	54	0.0555556
chr5	54444450	54444750	O417	3	156	chrSB:1400-1600	Stim2	NO	NO	NULL	54	0.0555556
chr5	54466350	54466650	O417	3	162	chrSB:1400-1600	Stim2	NO	NO	NULL	54	0.0555556
chr15	66733950	66734250	O417	3	106	chrSB:2000-2200	Wisp1	NO	NO	NULL	54	0.0555556
chr1	137879850	137880150	O73	12	154	chrSB:0-200	Igfn1	YES	NO	NULL	58	0.206897
chr1	137880750	137881050	O73	9	73	chrSB:0-200	Igfn1	YES	NO	NULL	58	0.155172
chr17	33802350	33802650	O73	31	945	chrSB:0-200	Hnrnpm	NO	NO	NULL	58	0.534483
chr18	32067450	32067750	O73	9	127	chrSB:0-200	Wdr33	YES	NO	NULL	58	0.155172
chr6	119983050	119983350	O73	22	125	chrSB:0-200	Hsn2	YES	NO	NULL	58	0.37931
chr8	124936950	124937250	O73	4	157	chrSB:0-200	Galnt2	NO	NO	NULL	58	0.0689655
chr16	38219850	38220150	O73	6	220	chrSB:450-650	Gsk3b	NO	NO	NULL	58	0.103448
chr6	119976450	119976750	O73	235	733	chrSB:450-650	Hsn2	YES	YES	NULL	58	4.05172
chr6	119979150	119979450	O73	67	299	chrSB:450-650	Hsn2	YES	YES	NULL	58	1.15517
chr7	74413050	74413350	O73	3	134	chrSB:450-650	Mef2a	NO	NO	NULL	58	0.0517241
chr1	57220350	57220650	O73	1026	7605	chrSB:900-1100	AC101777.1	YES	NO	NULL	58	17.6897
chr1	57220950	57221250	O73	15	660	chrSB:900-1100	AC101777.1	YES	NO	NULL	58	0.258621
chr1	57221550	57221850	O73	18	316	chrSB:900-1100	AC101777.1	YES	NO	NULL	58	0.310345
chr1	57221850	57222150	O73	3	252	chrSB:900-1100	AC101777.1	YES	NO	NULL	58	0.0517241
chr1	57222750	57223050	O73	9	241	chrSB:900-1100	AC101777.1	YES	NO	NULL	58	0.155172
chr1	57241050	57241350	O73	10	83	chrSB:900-1100	AC101777.1	YES	NO	NULL	58	0.172414
chr1	57243750	57244050	O73	3129	28623	chrSB:900-1100	AC101777.1	YES	NO	NULL	58	53.9483
chr1	64777650	64777950	O73	4	218	chrSB:900-1100	AC101915.1	YES	NO	NULL	58	0.0689655
chr1	137876250	137876550	O73	64	1044	chrSB:900-1100	Igfn1	YES	NO	NULL	58	1.10345
chr1	137878350	137878650	O73	104	759	chrSB:900-1100	Igfn1	YES	NO	NULL	58	1.7931
chr1	193175250	193175550	O73	8	522	chrSB:900-1100	Ppp2r5a	NO	NO	NULL	58	0.137931
chr10	19625550	19625850	O73	3	103	chrSB:900-1100	Pex7	YES	NO	NULL	58	0.0517241
chr10	19640850	19641150	O73	46	254	chrSB:900-1100	Map3k5	YES	NO	NULL	58	0.793103
chr10	19642350	19642650	O73	47	447	chrSB:900-1100	Map3k5	YES	NO	NULL	58	0.810345
chr11	6258450	6258750	O73	13	1272	chrSB:900-1100	Ogdh	NO	NO	NULL	58	0.224138
chr11	74952450	74952750	O73	105	1235	chrSB:900-1100	Smg6	NO	NO	NULL	58	1.81034
chr11	74952750	74953050	O73	827	5152	chrSB:900-1100	Smg6	NO	NO	NULL	58	14.2586
chr11	82777050	82777350	O73	13	949	chrSB:900-1100	Slfn5	NO	NO	NULL	58	0.224138
chr12	35122050	35122350	O73	46	672	chrSB:900-1100	Hdac9	NO	NO	NULL	58	0.793103
chr12	52907550	52907850	O73	6	179	chrSB:900-1100	Hectd1	YES	NO	NULL	58	0.103448
chr12	52928250	52928550	O73	66	407	chrSB:900-1100	Hectd1	YES	NO	NULL	58	1.13793
chr12	52930950	52931250	O73	12	186	chrSB:900-1100	Gm5785	YES	NO	NULL	58	0.206897
chr12	78062250	78062550	O73	5	200	chrSB:900-1100	Max	YES	NO	NULL	58	0.0862069
chr12	78121950	78122250	O73	14	115	chrSB:900-1100	Max	YES	NO	NULL	58	0.241379
chr13	23460750	23461050	O73	47	496	chrSB:900-1100	RP23-9O13.8	YES	NO	NULL	58	0.810345
chr13	23508450	23508750	O73	6	18	chrSB:900-1100	Abt1	YES	NO	NULL	58	0.103448
chr13	23513850	23514150	O73	20	680	chrSB:900-1100	Abt1	YES	NO	NULL	58	0.344828
chr13	43082550	43082850	O73	4	396	chrSB:900-1100	Phactr1	YES	NO	NULL	58	0.0689655
chr13	43083150	43083450	O73	190	1673	chrSB:900-1100	Phactr1	YES	NO	NULL	58	3.27586
chr13	43088850	43089150	O73	7	652	chrSB:900-1100	Phactr1	YES	NO	NULL	58	0.12069
chr13	43089150	43089450	O73	28	1040	chrSB:900-1100	Phactr1	YES	NO	NULL	58	0.482759
chr13	43103550	43103850	O73	30	757	chrSB:900-1100	Phactr1	YES	NO	NULL	58	0.517241
chr13	43131150	43131450	O73	282	1722	chrSB:900-1100	Phactr1	YES	NO	NULL	58	4.86207
chr13	43132650	43132950	O73	231	2094	chrSB:900-1100	Phactr1	YES	NO	NULL	58	3.98276
chr13	43144050	43144350	O73	15	113	chrSB:900-1100	Phactr1	YES	NO	NULL	58	0.258621
chr13	44645250	44645550	O73	4	12	chrSB:900-1100	Jarid2	NO	NO	NULL	58	0.0689655
chr13	101941950	101942250	O73	8	36	chrSB:900-1100	AC153153.1	YES	YES	NULL	58	0.137931
chr13	102014250	102014550	O73	3	75	chrSB:900-1100	4932411K12Rik	NO	NO	NULL	58	0.0517241
chr14	15326850	15327150	O73	50	320	chrSB:900-1100	Il3ra	YES	NO	NULL	58	0.862069
chr14	31813350	31813650	O73	946	12515	chrSB:900-1100	Spcs1	NO	NO	NULL	58	16.3103
chr14	31813650	31813950	O73	1278	12949	chrSB:900-1100	Spcs1	NO	NO	NULL	58	22.0345
chr14	31816350	31816650	O73	5	150	chrSB:900-1100	Glt8d1	NO	NO	NULL	58	0.0862069
chr14	31823250	31823550	O73	14	448	chrSB:900-1100	Glt8d1	NO	NO	NULL	58	0.241379
chr14	33802050	33802350	O73	6	92	chrSB:900-1100	Wdfy4	YES	NO	NULL	58	0.103448
chr14	52731750	52732050	O73	9	55	chrSB:900-1100	Rpgrip1	YES	NO	NULL	58	0.155172
chr14	52734150	52734450	O73	29	182	chrSB:900-1100	Rpgrip1	YES	NO	NULL	58	0.5
chr15	37941150	37941450	O73	8	196	chrSB:900-1100	Ubr5	YES	NO	NULL	58	0.137931
chr15	37941450	37941750	O73	18	573	chrSB:900-1100	Ubr5	YES	NO	NULL	58	0.310345
chr16	13742850	13743150	O73	3	56	chrSB:900-1100	RP23-331D17.2	YES	NO	NULL	58	0.0517241
chr16	13781850	13782150	O73	10	93	chrSB:900-1100	Rrn3	YES	NO	NULL	58	0.172414
chr16	13782150	13782450	O73	24	107	chrSB:900-1100	Rrn3	YES	YES	NULL	58	0.413793
chr16	13783950	13784250	O73	3	191	chrSB:900-1100	Rrn3	YES	NO	NULL	58	0.0517241
chr16	13788750	13789050	O73	5	286	chrSB:900-1100	Rrn3	YES	NO	NULL	58	0.0862069
chr16	34073850	34074150	O73	7	86	chrSB:900-1100	Kalrn	YES	NO	NULL	58	0.12069
chr16	34074150	34074450	O73	56	302	chrSB:900-1100	Kalrn	YES	NO	NULL	58	0.965517
chr16	34086750	34087050	O73	115	1191	chrSB:900-1100	Kalrn	YES	NO	NULL	58	1.98276
chr16	34107450	34107750	O73	30	365	chrSB:900-1100	Kalrn	YES	NO	NULL	58	0.517241
chr16	34109250	34109550	O73	5	166	chrSB:900-1100	Kalrn	YES	NO	NULL	58	0.0862069
chr16	34116150	34116450	O73	15	220	chrSB:900-1100	Kalrn	YES	NO	NULL	58	0.258621
chr16	34119750	34120050	O73	40	467	chrSB:900-1100	Kalrn	YES	NO	NULL	58	0.689655
chr16	34120050	34120350	O73	5	211	chrSB:900-1100	Kalrn	YES	NO	NULL	58	0.0862069
chr16	34131750	34132050	O73	42	159	chrSB:900-1100	Kalrn	YES	YES	NULL	58	0.724138
chr16	38228550	38228850	O73	252	2037	chrSB:900-1100	Gsk3b	NO	NO	NULL	58	4.34483
chr16	38228850	38229150	O73	117	1112	chrSB:900-1100	Gsk3b	NO	NO	NULL	58	2.01724
chr16	38240550	38240850	O73	116	3612	chrSB:900-1100	Gsk3b	NO	NO	NULL	58	2
chr16	74046150	74046450	O73	10	387	chrSB:900-1100	Robo2	YES	NO	NULL	58	0.172414
chr16	74046750	74047050	O73	78	371	chrSB:900-1100	Robo2	YES	YES	NULL	58	1.34483
chr16	74047050	74047350	O73	53	592	chrSB:900-1100	Robo2	YES	NO	NULL	58	0.913793
chr17	30079050	30079350	O73	9	19	chrSB:900-1100	Mdga1	YES	NO	NULL	58	0.155172
chr17	30082650	30082950	O73	4	42	chrSB:900-1100	Mdga1	YES	NO	NULL	58	0.0689655
chr17	30122250	30122550	O73	269	2913	chrSB:900-1100	SNORA70	YES	NO	NULL	58	4.63793
chr17	30122550	30122850	O73	36	1237	chrSB:900-1100	SNORA70	YES	NO	NULL	58	0.62069
chr17	30122850	30123150	O73	401	2471	chrSB:900-1100	SNORA70	YES	NO	NULL	58	6.91379
chr17	30123150	30123450	O73	49	1151	chrSB:900-1100	SNORA70	YES	NO	NULL	58	0.844828
chr17	30135750	30136050	O73	40	531	chrSB:900-1100	Zfand3	YES	NO	NULL	58	0.689655
chr17	33795750	33796050	O73	118	3254	chrSB:900-1100	Hnrnpm	YES	NO	NULL	58	2.03448
chr17	33796950	33797250	O73	981	5403	chrSB:900-1100	Hnrnpm	YES	NO	NULL	58	16.9138
chr17	33799950	33800250	O73	54	2012	chrSB:900-1100	Hnrnpm	YES	NO	NULL	58	0.931034
chr17	33801750	33802050	O73	14	327	chrSB:900-1100	Hnrnpm	YES	NO	NULL	58	0.241379
chr17	33802350	33802650	O73	13	945	chrSB:900-1100	Hnrnpm	NO	NO	NULL	58	0.224138
chr18	32101350	32101650	O73	308	1701	chrSB:900-1100	Lims2	YES	NO	NULL	58	5.31034
chr18	61265550	61265850	O73	3	54	chrSB:900-1100	Csf1r	YES	NO	NULL	58	0.0517241
chr18	61269150	61269450	O73	6	180	chrSB:900-1100	Csf1r	YES	NO	NULL	58	0.103448
chr19	17028750	17029050	O73	7	272	chrSB:900-1100	Prune2	YES	NO	NULL	58	0.12069
chr19	17029050	17029350	O73	3	140	chrSB:900-1100	Prune2	YES	NO	NULL	58	0.0517241
chr19	17029350	17029650	O73	32	295	chrSB:900-1100	Prune2	YES	NO	NULL	58	0.551724
chr2	4393950	4394250	O73	4	72	chrSB:900-1100	Frmd4a	NO	NO	NULL	58	0.0689655
chr2	31536450	31536750	O73	13	1289	chrSB:900-1100	RP23-65P13.2	NO	NO	NULL	58	0.224138
chr2	58332150	58332450	O73	98	1363	chrSB:900-1100	Acvr1	YES	NO	NULL	58	1.68966
chr2	58352850	58353150	O73	6	547	chrSB:900-1100	Acvr1	YES	NO	NULL	58	0.103448
chr2	58359750	58360050	O73	12	262	chrSB:900-1100	Acvr1	YES	NO	NULL	58	0.206897
chr2	58368450	58368750	O73	62	507	chrSB:900-1100	Acvr1	YES	NO	NULL	58	1.06897
chr2	91620450	91620750	O73	4	131	chrSB:900-1100	Ambra1	YES	NO	NULL	58	0.0689655
chr2	91666350	91666650	O73	6	75	chrSB:900-1100	Ambra1	YES	NO	NULL	58	0.103448
chr3	51660750	51661050	O73	84	887	chrSB:900-1100	Maml3	NO	NO	NULL	58	1.44828
chr3	52846950	52847250	O73	244	2249	chrSB:900-1100	Lhfp	YES	NO	NULL	58	4.2069
chr3	53035650	53035950	O73	382	3246	chrSB:900-1100	Lhfp	NO	NO	NULL	58	6.58621
chr3	53064150	53064450	O73	82	2825	chrSB:900-1100	Lhfp	NO	NO	NULL	58	1.41379
chr3	78976650	78976950	O73	66	475	chrSB:900-1100	Rapgef2	YES	NO	NULL	58	1.13793
chr3	78976950	78977250	O73	15	248	chrSB:900-1100	Rapgef2	YES	NO	NULL	58	0.258621
chr3	78978750	78979050	O73	3	102	chrSB:900-1100	Rapgef2	YES	NO	NULL	58	0.0517241
chr3	88173150	88173450	O73	9	207	chrSB:900-1100	Paqr6	NO	NO	NULL	58	0.155172
chr3	130825650	130825950	O73	233	604	chrSB:900-1100	Lef1	YES	YES	NULL	58	4.01724
chr3	130846950	130847250	O73	6	182	chrSB:900-1100	Lef1	YES	NO	NULL	58	0.103448
chr3	130847250	130847550	O73	3	61	chrSB:900-1100	Lef1	YES	NO	NULL	58	0.0517241
chr4	41261250	41261550	O73	16	396	chrSB:900-1100	Dcaf12	YES	NO	NULL	58	0.275862
chr4	41263050	41263350	O73	10	344	chrSB:900-1100	Dcaf12	YES	NO	NULL	58	0.172414
chr4	41263650	41263950	O73	232	1238	chrSB:900-1100	Dcaf12	YES	NO	NULL	58	4
chr4	41267250	41267550	O73	1500	8291	chrSB:900-1100	Dcaf12	YES	NO	NULL	58	25.8621
chr4	41318550	41318850	O73	4	108	chrSB:900-1100	Ubap1	YES	NO	NULL	58	0.0689655
chr4	88922550	88922850	O73	5095	61748	chrSB:900-1100	Cdkn2a	YES	NO	NULL	58	87.8448
chr4	88940550	88940850	O73	382	3255	chrSB:900-1100	Cdkn2a	YES	NO	NULL	58	6.58621
chr4	88940850	88941150	O73	7	693	chrSB:900-1100	Cdkn2a	YES	NO	NULL	58	0.12069
chr4	94245450	94245750	O73	5	143	chrSB:900-1100	Plaa	NO	NO	NULL	58	0.0862069
chr4	94262250	94262550	O73	3	79	chrSB:900-1100	Plaa	NO	NO	NULL	58	0.0517241
chr4	94307550	94307850	O73	190	1154	chrSB:900-1100	Lrrc19	NO	NO	NULL	58	3.27586
chr4	94309950	94310250	O73	14	625	chrSB:900-1100	Lrrc19	NO	NO	NULL	58	0.241379
chr4	94349850	94350150	O73	11	119	chrSB:900-1100	Ift74	NO	NO	NULL	58	0.189655
chr4	94350150	94350450	O73	21	176	chrSB:900-1100	Ift74	NO	NO	NULL	58	0.362069
chr4	94357650	94357950	O73	22	103	chrSB:900-1100	Ift74	NO	YES	NULL	58	0.37931
chr4	94359150	94359450	O73	4	60	chrSB:900-1100	Ift74	NO	NO	NULL	58	0.0689655
chr4	94363350	94363650	O73	5	45	chrSB:900-1100	Ift74	NO	NO	NULL	58	0.0862069
chr4	94363650	94363950	O73	4	56	chrSB:900-1100	Ift74	NO	NO	NULL	58	0.0689655
chr4	126469050	126469350	O73	3	62	chrSB:900-1100	AU040320	YES	NO	NULL	58	0.0517241
chr4	136890750	136891050	O73	10	452	chrSB:900-1100	Cdc42	YES	NO	NULL	58	0.172414
chr4	136891050	136891350	O73	9	457	chrSB:900-1100	Cdc42	YES	NO	NULL	58	0.155172
chr4	136901850	136902150	O73	75	697	chrSB:900-1100	Cdc42	YES	NO	NULL	58	1.2931
chr4	136903350	136903650	O73	29	1352	chrSB:900-1100	Cdc42	YES	NO	NULL	58	0.5
chr4	136903650	136903950	O73	1069	10285	chrSB:900-1100	Cdc42	YES	NO	NULL	58	18.431
chr4	137698050	137698350	O73	4	305	chrSB:900-1100	Eif4g3	YES	NO	NULL	58	0.0689655
chr4	137700450	137700750	O73	3	192	chrSB:900-1100	Eif4g3	YES	NO	NULL	58	0.0517241
chr4	137707050	137707350	O73	5	271	chrSB:900-1100	Eif4g3	YES	NO	NULL	58	0.0862069
chr4	137707350	137707650	O73	19	463	chrSB:900-1100	Eif4g3	YES	NO	NULL	58	0.327586
chr5	119120850	119121150	O73	11	88	chrSB:900-1100	Med13l	NO	NO	NULL	58	0.189655
chr5	119130750	119131050	O73	18	178	chrSB:900-1100	Med13l	NO	NO	NULL	58	0.310345
chr5	119168250	119168550	O73	4	103	chrSB:900-1100	Med13l	NO	NO	NULL	58	0.0689655
chr6	39592950	39593250	O73	50	1212	chrSB:900-1100	Braf	YES	NO	NULL	58	0.862069
chr6	39594150	39594450	O73	88	913	chrSB:900-1100	Braf	YES	NO	NULL	58	1.51724
chr6	87043650	87043950	O73	6	26	chrSB:900-1100	Gfpt1	NO	NO	NULL	58	0.103448
chr6	115389750	115390050	O73	336	2045	chrSB:900-1100	Pparg	YES	NO	NULL	58	5.7931
chr6	119976450	119976750	O73	123	733	chrSB:900-1100	Hsn2	YES	NO	NULL	58	2.12069
chr6	122663550	122663850	O73	8	215	chrSB:900-1100	Nanog	NO	NO	NULL	58	0.137931
chr7	74410650	74410950	O73	167	1612	chrSB:900-1100	Mef2a	NO	NO	NULL	58	2.87931
chr7	74410950	74411250	O73	18	914	chrSB:900-1100	Mef2a	NO	NO	NULL	58	0.310345
chr7	87225750	87226050	O73	35	207	chrSB:900-1100	Zfp710	YES	NO	NULL	58	0.603448
chr8	18710550	18710850	O73	136	2784	chrSB:900-1100	Mcph1	YES	NO	NULL	58	2.34483
chr8	18713850	18714150	O73	368	2573	chrSB:900-1100	Mcph1	YES	NO	NULL	58	6.34483
chr8	18714150	18714450	O73	23	1371	chrSB:900-1100	Mcph1	YES	NO	NULL	58	0.396552
chr8	18740850	18741150	O73	62	778	chrSB:900-1100	Mcph1	YES	NO	NULL	58	1.06897
chr8	47459250	47459550	O73	171	910	chrSB:900-1100	Helt	NO	NO	NULL	58	2.94828
chr8	121983150	121983450	O73	14	60	chrSB:900-1100	Necab2	YES	YES	NULL	58	0.241379
chr9	21036150	21036450	O73	128	3074	chrSB:900-1100	Keap1	YES	NO	NULL	58	2.2069
chr9	21041850	21042150	O73	161	2027	chrSB:900-1100	Keap1	YES	NO	NULL	58	2.77586
chrX	7497750	7498050	O73	24	310	chrSB:900-1100	Pcsk1n	YES	NO	NULL	58	0.413793
chrX	7498050	7498350	O73	4	76	chrSB:900-1100	Pcsk1n	YES	NO	NULL	58	0.0689655
chrX	7501950	7502250	O73	1716	19522	chrSB:900-1100	Eras	YES	NO	NULL	58	29.5862
chrX	7502250	7502550	O73	71	3715	chrSB:900-1100	Eras	YES	NO	NULL	58	1.22414
chrX	138785850	138786150	O73	44	1321	chrSB:900-1100	Acsl4	YES	NO	NULL	58	0.758621
chrX	138786150	138786450	O73	25	874	chrSB:900-1100	Acsl4	YES	NO	NULL	58	0.431034
chrX	138794850	138795150	O73	3	193	chrSB:900-1100	Acsl4	YES	NO	NULL	58	0.0517241
chrX	138806250	138806550	O73	4	81	chrSB:900-1100	Acsl4	YES	NO	NULL	58	0.0689655
chr1	57245250	57245550	O73	3	47	chrSB:2000-2200	AC101777.1	YES	NO	NULL	58	0.0517241
chr1	64777650	64777950	O73	9	218	chrSB:2000-2200	AC101915.1	YES	NO	NULL	58	0.155172
chr1	137879850	137880150	O73	19	154	chrSB:2000-2200	Igfn1	YES	NO	NULL	58	0.327586
chr10	19659750	19660050	O73	55	342	chrSB:2000-2200	Map3k5	YES	NO	NULL	58	0.948276
chr10	127543050	127543350	O73	8	61	chrSB:2000-2200	Baz2a	YES	NO	NULL	58	0.137931
chr12	52931850	52932150	O73	7	17	chrSB:2000-2200	Gm5785	YES	NO	NULL	58	0.12069
chr12	78060750	78061050	O73	3	86	chrSB:2000-2200	Max	YES	NO	NULL	58	0.0517241
chr13	23455350	23455650	O73	9	54	chrSB:2000-2200	RP23-9O13.8	YES	NO	NULL	58	0.155172
chr14	15335250	15335550	O73	5	27	chrSB:2000-2200	Il3ra	YES	NO	NULL	58	0.0862069
chr14	52704150	52704450	O73	5	219	chrSB:2000-2200	Hnrnpc	YES	NO	NULL	58	0.0862069
chr15	37934550	37934850	O73	8	56	chrSB:2000-2200	Ubr5	YES	NO	NULL	58	0.137931
chr16	13741950	13742250	O73	10	27	chrSB:2000-2200	RP23-331D17.2	NO	NO	NULL	58	0.172414
chr16	38228250	38228550	O73	7	443	chrSB:2000-2200	Gsk3b	NO	NO	NULL	58	0.12069
chr16	74066850	74067150	O73	3	16	chrSB:2000-2200	Robo2	YES	NO	NULL	58	0.0517241
chr17	30143250	30143550	O73	4	83	chrSB:2000-2200	Zfand3	YES	NO	NULL	58	0.0689655
chr17	33802050	33802350	O73	16	275	chrSB:2000-2200	Hnrnpm	YES	NO	NULL	58	0.275862
chr18	32067750	32068050	O73	11	63	chrSB:2000-2200	Wdr33	YES	NO	NULL	58	0.189655
chr19	17029350	17029650	O73	6	295	chrSB:2000-2200	Prune2	YES	NO	NULL	58	0.103448
chr19	47444850	47445150	O73	8	32	chrSB:2000-2200	Sh3pxd2a	NO	YES	NULL	58	0.137931
chr2	91729050	91729350	O73	5	102	chrSB:2000-2200	Ambra1	YES	NO	NULL	58	0.0862069
chr2	91729350	91729650	O73	4	38	chrSB:2000-2200	Ambra1	YES	NO	NULL	58	0.0689655
chr3	51808650	51808950	O73	3	92	chrSB:2000-2200	Maml3	YES	NO	NULL	58	0.0517241
chr3	52844250	52844550	O73	3	15	chrSB:2000-2200	Lhfp	YES	NO	NULL	58	0.0517241
chr3	52844550	52844850	O73	9	83	chrSB:2000-2200	Lhfp	YES	NO	NULL	58	0.155172
chr3	78992250	78992550	O73	6	12	chrSB:2000-2200	Rapgef2	YES	NO	NULL	58	0.103448
chr3	130851450	130851750	O73	7	35	chrSB:2000-2200	Lef1	YES	YES	NULL	58	0.12069
chr4	41259150	41259450	O73	6	96	chrSB:2000-2200	Dcaf12	YES	NO	NULL	58	0.103448
chr4	88942050	88942350	O73	17	35	chrSB:2000-2200	Cdkn2a	YES	YES	NULL	58	0.293103
chr4	136882050	136882350	O73	9	341	chrSB:2000-2200	Cdc42	YES	NO	NULL	58	0.155172
chr6	119969550	119969850	O73	4	58	chrSB:2000-2200	Hsn2	YES	NO	NULL	58	0.0689655
chr7	74412750	74413050	O73	3	52	chrSB:2000-2200	Mef2a	NO	NO	NULL	58	0.0517241
chr8	18742950	18743250	O73	3	49	chrSB:2000-2200	Mcph1	YES	NO	NULL	58	0.0517241
chr8	124936650	124936950	O73	7	118	chrSB:2000-2200	Galnt2	NO	NO	NULL	58	0.12069
chr9	21042150	21042450	O73	30	371	chrSB:2000-2200	Keap1	YES	NO	NULL	58	0.517241
chrX	7503450	7503750	O73	24	439	chrSB:2000-2200	Eras	YES	NO	NULL	58	0.413793
chr17	42972150	42972450	O74	6	226	chrSB:0-200	Cd2ap	NO	NO	NULL	95	0.0631579
chr17	75935850	75936150	O74	7	65	chrSB:0-200	Fam98a	YES	NO	NULL	95	0.0736842
chr19	32875650	32875950	O74	34	193	chrSB:0-200	Pten	NO	NO	NULL	95	0.357895
chr4	136114350	136114650	O74	3	292	chrSB:0-200	Kdm1a	YES	NO	NULL	95	0.0315789
chr7	74438550	74438850	O74	6	32	chrSB:0-200	Mef2a	YES	NO	NULL	95	0.0631579
chr9	88356150	88356450	O74	3	285	chrSB:0-200	Syncrip	YES	NO	NULL	95	0.0315789
chr13	74344350	74344650	O74	3	101	chrSB:450-650	Exoc3	NO	NO	NULL	95	0.0315789
chr17	75937950	75938250	O74	7	594	chrSB:450-650	Fam98a	YES	NO	NULL	95	0.0736842
chr18	61739850	61740150	O74	22	1512	chrSB:450-650	Csnk1a1	NO	NO	NULL	95	0.231579
chr2	155027850	155028150	O74	3	44	chrSB:450-650	Itch	NO	NO	NULL	95	0.0315789
chr6	67222050	67222350	O74	24	2246	chrSB:450-650	Serbp1	YES	NO	NULL	95	0.252632
chr8	4625850	4626150	O74	9	99	chrSB:450-650	BC003267	YES	NO	NULL	95	0.0947368
chr8	4626150	4626450	O74	8	89	chrSB:450-650	BC003267	YES	NO	NULL	95	0.0842105
chr9	43981350	43981650	O74	4	14	chrSB:450-650	Cbl	NO	NO	NULL	95	0.0421053
chr1	192860550	192860850	O74	3	8	chrSB:900-1100	AC138229.2	NO	NO	NULL	95	0.0315789
chr1	192863250	192863550	O74	3	32	chrSB:900-1100	AC138229.2	NO	NO	NULL	95	0.0315789
chr10	19642350	19642650	O74	4	4	chrSB:900-1100	Map3k5	NO	NO	NULL	95	0.0421053
chr10	80153850	80154150	O74	3	275	chrSB:900-1100	Mobkl2a	NO	NO	NULL	95	0.0315789
chr10	80154150	80154450	O74	8	141	chrSB:900-1100	Mobkl2a	NO	NO	NULL	95	0.0842105
chr10	82347150	82347450	O74	7	296	chrSB:900-1100	Txnrd1	NO	NO	NULL	95	0.0736842
chr11	94722750	94723050	O74	3	49	chrSB:900-1100	RP23-53E2.3	NO	NO	NULL	95	0.0315789
chr12	77451150	77451450	O74	7	551	chrSB:900-1100	Zbtb25	YES	NO	NULL	95	0.0736842
chr12	77456850	77457150	O74	49	547	chrSB:900-1100	Zbtb25	YES	NO	NULL	95	0.515789
chr12	77458050	77458350	O74	3	108	chrSB:900-1100	Zbtb25	YES	NO	NULL	95	0.0315789
chr12	77472150	77472450	O74	65	1144	chrSB:900-1100	Zbtb1	YES	NO	NULL	95	0.684211
chr12	77472750	77473050	O74	3	183	chrSB:900-1100	Zbtb1	YES	NO	NULL	95	0.0315789
chr12	78670350	78670650	O74	6	19	chrSB:900-1100	Fut8	NO	NO	NULL	95	0.0631579
chr12	78734850	78735150	O74	5	14	chrSB:900-1100	Fut8	NO	NO	NULL	95	0.0526316
chr13	51820650	51820950	O74	33	383	chrSB:900-1100	Sema4d	YES	NO	NULL	95	0.347368
chr14	22831950	22832250	O74	3	3	chrSB:900-1100	1700112E06Rik	NO	NO	NULL	95	0.0315789
chr14	121736550	121736850	O74	31	467	chrSB:900-1100	Stk24	YES	NO	NULL	95	0.326316
chr15	73280850	73281150	O74	3	23	chrSB:900-1100	AC132863.1	NO	NO	NULL	95	0.0315789
chr15	78698550	78698850	O74	3	18	chrSB:900-1100	Gga1	NO	NO	NULL	95	0.0315789
chr15	78711450	78711750	O74	5	285	chrSB:900-1100	Gga1	NO	NO	NULL	95	0.0526316
chr17	3301950	3302250	O74	13	349	chrSB:900-1100	AC165953.1	YES	NO	NULL	95	0.136842
chr17	3346950	3347250	O74	3	20	chrSB:900-1100	AC165953.1	YES	NO	NULL	95	0.0315789
chr17	3349950	3350250	O74	5	71	chrSB:900-1100	AC165953.1	YES	NO	NULL	95	0.0526316
chr17	3421050	3421350	O74	6	45	chrSB:900-1100	Tiam2	YES	NO	NULL	95	0.0631579
chr17	3421350	3421650	O74	13	341	chrSB:900-1100	Tiam2	YES	NO	NULL	95	0.136842
chr17	3427050	3427350	O74	3	250	chrSB:900-1100	Tiam2	YES	NO	NULL	95	0.0315789
chr17	43156050	43156350	O74	24	2157	chrSB:900-1100	Tnfrsf21	YES	NO	NULL	95	0.252632
chr17	43159650	43159950	O74	51	591	chrSB:900-1100	Tnfrsf21	YES	NO	NULL	95	0.536842
chr17	43159950	43160250	O74	4	65	chrSB:900-1100	Tnfrsf21	YES	NO	NULL	95	0.0421053
chr17	66872550	66872850	O74	4	28	chrSB:900-1100	Rab12	NO	NO	NULL	95	0.0421053
chr18	61361850	61362150	O74	3	22	chrSB:900-1100	Slc26a2	NO	NO	NULL	95	0.0315789
chr18	70686150	70686450	O74	4	52	chrSB:900-1100	Poli	NO	NO	NULL	95	0.0421053
chr18	84213450	84213750	O74	68	766	chrSB:900-1100	Tshz1	YES	NO	NULL	95	0.715789
chr19	9969750	9970050	O74	5	135	chrSB:900-1100	Incenp	NO	NO	NULL	95	0.0526316
chr19	9974250	9974550	O74	3	81	chrSB:900-1100	Incenp	NO	NO	NULL	95	0.0315789
chr19	9999150	9999450	O74	3	88	chrSB:900-1100	AC132253.2	NO	NO	NULL	95	0.0315789
chr19	9999450	9999750	O74	8	92	chrSB:900-1100	AC132253.2	NO	NO	NULL	95	0.0842105
chr19	10002750	10003050	O74	3	68	chrSB:900-1100	AC132253.2	NO	NO	NULL	95	0.0315789
chr19	46211550	46211850	O74	4	87	chrSB:900-1100	Pitx3	YES	NO	NULL	95	0.0421053
chr2	25221450	25221750	O74	3	21	chrSB:900-1100	Uap1l1	NO	NO	NULL	95	0.0315789
chr3	103468950	103469250	O74	5	5	chrSB:900-1100	AC123057.2	NO	NO	NULL	95	0.0526316
chr3	107773050	107773350	O74	5	8	chrSB:900-1100	Gstm3	NO	NO	NULL	95	0.0526316
chr3	107821950	107822250	O74	5	5	chrSB:900-1100	RP23-214E3.11	NO	NO	NULL	95	0.0526316
chr4	8674350	8674650	O74	4	9	chrSB:900-1100	Chd7	NO	NO	NULL	95	0.0421053
chr4	45828150	45828450	O74	7	44	chrSB:900-1100	Igfbpl1	NO	NO	NULL	95	0.0736842
chr4	59328150	59328450	O74	3	89	chrSB:900-1100	Susd1	NO	NO	NULL	95	0.0315789
chr4	88925550	88925850	O74	4	152	chrSB:900-1100	Cdkn2a	YES	NO	NULL	95	0.0421053
chr4	88925850	88926150	O74	4	96	chrSB:900-1100	Cdkn2a	YES	NO	NULL	95	0.0421053
chr4	88939950	88940250	O74	7	66	chrSB:900-1100	Cdkn2a	YES	NO	NULL	95	0.0736842
chr4	123233850	123234150	O74	6	14	chrSB:900-1100	Macf1	YES	NO	NULL	95	0.0631579
chr4	133336950	133337250	O74	4	75	chrSB:900-1100	RP24-106O24.1	YES	NO	NULL	95	0.0421053
chr4	153838050	153838350	O74	10	114	chrSB:900-1100	Prdm16	NO	NO	NULL	95	0.105263
chr6	67227750	67228050	O74	76	7339	chrSB:900-1100	Serbp1	YES	NO	NULL	95	0.8
chr6	97155150	97155450	O74	3	105	chrSB:900-1100	Uba3	NO	NO	NULL	95	0.0315789
chr6	142612950	142613250	O74	3	15	chrSB:900-1100	Abcc9	NO	NO	NULL	95	0.0315789
chr7	87805350	87805650	O74	3	9	chrSB:900-1100	Crtc3	YES	NO	NULL	95	0.0315789
chr7	97273050	97273350	O74	5	110	chrSB:900-1100	AC130210.1	YES	NO	NULL	95	0.0526316
chr7	97273350	97273650	O74	9	165	chrSB:900-1100	AC130210.1	YES	NO	NULL	95	0.0947368
chr7	120529650	120529950	O74	3	124	chrSB:900-1100	Pth	NO	NO	NULL	95	0.0315789
chr7	137312250	137312550	O74	3	129	chrSB:900-1100	Fgfr2	NO	NO	NULL	95	0.0315789
chr7	138021150	138021450	O74	75	428	chrSB:900-1100	Fgfr2	YES	NO	NULL	95	0.789474
chr8	127163250	127163550	O74	28	1778	chrSB:900-1100	2310022B05Rik	YES	NO	NULL	95	0.294737
chr9	21766050	21766350	O74	3	54	chrSB:900-1100	Epor	NO	NO	NULL	95	0.0315789
chr9	22691850	22692150	O74	17	292	chrSB:900-1100	Bbs9	NO	NO	NULL	95	0.178947
chr9	22692150	22692450	O74	12	507	chrSB:900-1100	Bbs9	NO	NO	NULL	95	0.126316
chr9	60929850	60930150	O74	29	109	chrSB:900-1100	Uaca	NO	YES	NULL	95	0.305263
chr9	60930150	60930450	O74	19	192	chrSB:900-1100	Uaca	NO	NO	NULL	95	0.2
chr9	96506250	96506550	O74	3	47	chrSB:900-1100	Rasa2	NO	NO	NULL	95	0.0315789
chr12	77473050	77473350	O74	17	160	chrSB:2000-2200	Zbtb1	YES	NO	NULL	95	0.178947
chr15	73250850	73251150	O74	11	32	chrSB:2000-2200	Ptk2	NO	YES	NULL	95	0.115789
chr15	78693750	78694050	O74	25	131	chrSB:2000-2200	Lgals2	NO	YES	NULL	95	0.263158
chr17	42972450	42972750	O74	3	228	chrSB:2000-2200	Cd2ap	NO	NO	NULL	95	0.0315789
chr17	43169850	43170150	O74	5	42	chrSB:2000-2200	Tnfrsf21	YES	NO	NULL	95	0.0526316
chr17	75935550	75935850	O74	3	7	chrSB:2000-2200	Fam98a	YES	NO	NULL	95	0.0315789
chr18	84213150	84213450	O74	15	38	chrSB:2000-2200	Tshz1	YES	YES	NULL	95	0.157895
chr19	32875350	32875650	O74	67	314	chrSB:2000-2200	Pten	YES	YES	NULL	95	0.705263
chr19	32875650	32875950	O74	9	193	chrSB:2000-2200	Pten	NO	NO	NULL	95	0.0947368
chr19	46237050	46237350	O74	5	18	chrSB:2000-2200	Gbf1	YES	NO	NULL	95	0.0526316
chr2	119299650	119299950	O74	3	10	chrSB:2000-2200	Ino80	YES	NO	NULL	95	0.0315789
chr4	63211950	63212250	O74	4	21	chrSB:2000-2200	Atp6v1g1	NO	NO	NULL	95	0.0421053
chr4	88923450	88923750	O74	10	89	chrSB:2000-2200	Cdkn2a	NO	NO	NULL	95	0.105263
chr4	132594150	132594450	O74	3	46	chrSB:2000-2200	Ahdc1	NO	NO	NULL	95	0.0315789
chr4	133297950	133298250	O74	12	40	chrSB:2000-2200	Arid1a	YES	YES	NULL	95	0.126316
chr4	133298250	133298550	O74	6	106	chrSB:2000-2200	Arid1a	YES	NO	NULL	95	0.0631579
chr9	88356150	88356450	O74	3	285	chrSB:2000-2200	Syncrip	YES	NO	NULL	95	0.0315789
chr11	53599650	53599950	O82	10	55	chrSB:450-650	RP23-303F24.3	YES	NO	YES	24	0.416667
chr11	53609250	53609550	O82	4	27	chrSB:450-650	RP23-303F24.3	YES	NO	YES	24	0.166667
chr11	53626950	53627250	O82	4	55	chrSB:450-650	RP23-303F24.3	YES	NO	YES	24	0.166667
chr11	53663250	53663550	O82	3	59	chrSB:450-650	RP23-303F24.3	YES	NO	YES	24	0.125
chr14	73662150	73662450	O82	5	38	chrSB:450-650	Rb1	NO	NO	NULL	24	0.208333
chr15	63942450	63942750	O82	13	339	chrSB:450-650	Asap1	NO	NO	YES	24	0.541667
chr18	6212250	6212550	O82	14	76	chrSB:450-650	Kif5b	YES	NO	YES	24	0.583333
chr18	6212550	6212850	O82	21	145	chrSB:450-650	Kif5b	YES	NO	YES	24	0.875
chr18	6213150	6213450	O82	4	291	chrSB:450-650	Kif5b	YES	NO	YES	24	0.166667
chr3	122129250	122129550	O82	6	227	chrSB:450-650	Bcar3	YES	NO	YES	24	0.25
chr3	122129550	122129850	O82	22	227	chrSB:450-650	Bcar3	YES	NO	YES	24	0.916667
chr14	73612650	73612950	O82	3	55	chrSB:900-1100	Rb1	NO	NO	NULL	24	0.125
chr14	73616250	73616550	O82	3	34	chrSB:900-1100	Rb1	NO	NO	NULL	24	0.125
chr15	44619150	44619450	O82	4	73	chrSB:900-1100	5730410E15Rik	NO	NO	YES	24	0.166667
chr15	44677050	44677350	O82	4	98	chrSB:900-1100	AC101827.1	NO	NO	YES	24	0.166667
chr18	32100450	32100750	O82	7	80	chrSB:900-1100	Lims2	YES	NO	YES	24	0.291667
chr8	10854150	10854450	O82	3	26	chrSB:900-1100	AC116499.1	YES	NO	YES	24	0.125
chr9	45931350	45931650	O82	8	56	chrSB:900-1100	Sik3	YES	NO	YES	24	0.333333
chr9	45934950	45935250	O82	4	91	chrSB:900-1100	Sik3	YES	NO	YES	24	0.166667
chr1	54982950	54983250	O82	3	19	chrSB:1400-1600	Ankrd44	NO	NO	NULL	24	0.125
chr1	193370250	193370550	O82	6	47	chrSB:1400-1600	Dtl	NO	NO	YES	24	0.25
chr11	120852150	120852450	O82	4	246	chrSB:1400-1600	Csnk1d	NO	NO	NULL	24	0.166667
chr18	6049050	6049350	O82	8	37	chrSB:1400-1600	Arhgap12	YES	YES	YES	24	0.333333
chr3	5245350	5245650	O82	20	181	chrSB:1400-1600	Zfhx4	YES	NO	YES	24	0.833333
chr7	135604650	135604950	O82	20	121	chrSB:1400-1600	Tial1	YES	NO	YES	24	0.833333
chr9	62188950	62189250	O82	41	156	chrSB:1400-1600	Anp32a	YES	YES	YES	24	1.70833
chr9	62189250	62189550	O82	47	312	chrSB:1400-1600	Anp32a	YES	NO	YES	24	1.95833
chr7	135598650	135598950	O82	3	33	chrSB:2000-2200	Tial1	NO	NO	YES	24	0.125
chr9	62202750	62203050	O82	4	99	chrSB:2000-2200	Anp32a	YES	NO	YES	24	0.166667
chr9	62203050	62203350	O82	3	82	chrSB:2000-2200	Anp32a	YES	NO	YES	24	0.125

## Sheet: S2-High CPM fusions
Supplementary Table 2
gene	tumor	CPM
RP23-204P1.2	O109	0.564516
Pth	O109	0.596774
Pth	O109	11.4032
Zmynd11	O112	0.512397
Krt222	O112	0.528926
Krt222	O112	0.533058
Smarce1	O112	0.557851
Ralb	O112	0.570248
Prkag2	O112	0.644628
Sorcs2	O112	0.64876
Iars	O112	0.706612
AC125270.2	O112	0.756198
AC125270.2	O112	0.838843
Krt222	O112	0.950413
Ints8	O112	0.950413
Setd2	O112	0.954545
Sorcs2	O112	0.983471
Sorcs2	O112	1.13223
Bcar3	O112	1.14876
Creb1	O112	1.2686
Tfb2m	O112	1.40909
Sorcs2	O112	1.42562
Gm10779	O112	1.46281
Tmtc2	O112	1.56612
AC103621.1	O112	1.58264
Heatr3	O112	1.66529
Ints8	O112	1.73967
Mycl1	O112	1.89669
Poln	O112	1.96694
Creb1	O112	2.07025
Rab2a	O112	2.13223
Smarce1	O112	2.33884
mmu-mir-760	O112	2.91322
Mycl1	O112	3.03306
Poln	O112	4.97934
Gm10779	O112	5.12397
Poln	O112	5.87603
Bcar3	O112	6.20661
Heatr3	O112	6.40909
Poln	O112	8.00826
Serpina12	O112	8.37603
Poln	O112	8.40083
Serpina12	O112	15.9132
Chka	O112	35.5537
Mycl1	O112	95.686
Rbm12	O165	0.506024
Snrpc	O165	0.518072
Nfs1	O165	0.518072
Aktip	O165	0.518072
Sfrs5	O165	0.518072
Zfc3h1	O165	0.662651
Frmd4a	O165	0.759036
Sfrs5	O165	0.759036
Snrpc	O165	0.939759
Atp2a2	O165	1.80723
Aktip	O165	2.44578
Fam120a	O167	0.508772
Aff4	O167	0.526316
1700123I01Rik	O167	0.526316
1700003F12Rik	O167	0.54386
Lgr4	O167	0.596491
Mycl1	O167	0.596491
Smad3	O167	0.842105
Eras	O167	0.859649
Zbtb8a	O167	0.947368
Alpl	O167	0.964912
Mycl1	O167	0.982456
RP23-335N12.3	O167	1.03509
1700003F12Rik	O167	1.19298
Aff4	O167	1.24561
Fam120a	O167	1.24561
Rilpl2	O167	1.31579
Foxo3	O167	1.59649
Nsmce2	O167	1.84211
Sema6d	O167	1.84211
1700003F12Rik	O167	1.84211
1700123I01Rik	O167	1.92982
Pkp4	O167	2.24561
1700123I01Rik	O167	2.40351
Aco1	O167	3.19298
Thrap3	O167	4.38596
Alpl	O167	7.03509
Rilpl2	O167	8.22807
Nsmce2	O167	15.4035
Nsmce2	O167	15.8421
Eras	O167	22.6316
Bicc1	O235	0.616667
Bicc1	O235	0.666667
Pogz	O235	0.716667
Reep3	O235	0.733333
Myc	O235	0.933333
Dlgap4	O235	0.95
Pogz	O235	0.95
RP23-344H23.1	O235	1.18333
RP23-344H23.1	O235	1.18333
Pogz	O235	1.25
Tdp1	O235	1.41667
Pogz	O235	2.21667
Reep3	O235	3.16667
Myc	O235	4.7
Sfrs3	O245	0.516484
Doc2b	O245	0.516484
Cd2ap	O245	0.527473
Frs3	O245	0.527473
AC134581.1	O245	0.527473
Frs3	O245	0.538462
Prps1	O245	0.549451
Tbck	O245	0.571429
Stam	O245	0.582418
Pik3r1	O245	0.604396
Galnt2	O245	0.626374
Tax1bp1	O245	0.648352
Cd2ap	O245	0.659341
Ino80	O245	0.67033
Runx1	O245	0.681319
Grlf1	O245	0.692308
Zdhhc2	O245	0.692308
Dicer1	O245	0.692308
Satb2	O245	0.747253
Sox13	O245	0.835165
Sfrs3	O245	0.879121
Zdhhc2	O245	0.967033
Map3k14	O245	0.989011
Frs3	O245	1.10989
Capzb	O245	1.14286
Dicer1	O245	1.17582
Dpagt1	O245	1.18681
Zdhhc2	O245	1.1978
AC145610.2	O245	1.30769
Cd2ap	O245	1.31868
Ube2r2	O245	1.32967
Ints8	O245	1.38462
Doc2b	O245	1.49451
Snx7	O245	1.59341
Tax1bp1	O245	1.62637
Crkrs	O245	1.63736
Dicer1	O245	1.68132
Rab3b	O245	1.78022
Zdhhc2	O245	1.82418
Gmds	O245	1.87912
Camk2g	O245	1.97802
Ube2r2	O245	2
Zeb2	O245	2.32967
Zswim6	O245	2.57143
Tmem57	O245	2.67033
Gmds	O245	2.96703
Zeb2	O245	2.96703
Zeb2	O245	3.54945
Capzb	O245	4.05495
Snx7	O245	4.6044
Gmds	O245	4.63736
Ube2r2	O245	5.04396
Camk2g	O245	8.91209
Zeb2	O245	9.56044
Capzb	O245	10.8681
Kdm5c	O31	0.53125
Rsbn1l	O31	0.53125
RP23-103L13.1	O31	0.53125
1700112E06Rik	O31	0.541667
Rere	O31	0.604167
Mylk3	O31	0.614583
Pcsk1n	O31	0.614583
Thsd7a	O31	0.65625
Flna	O31	0.65625
Akt1	O31	0.666667
Smad5	O31	0.71875
Myo1e	O31	0.75
Cercam	O31	0.760417
Gbx1	O31	0.770833
Flna	O31	0.802083
Chd7	O31	0.822917
Chd7	O31	0.864583
Chd7	O31	0.895833
Flna	O31	1.01042
Rcan2	O31	1.03125
Gcnt1	O31	1.03125
Fam13b	O31	1.21875
Cercam	O31	1.35417
Mrpl51	O31	1.38542
Flna	O31	1.5625
Ptprd	O31	1.76042
Flna	O31	2.17708
Stim2	O31	2.27083
Ncapd2	O31	2.60417
RP23-103L13.1	O31	3.4375
Mrpl51	O31	4.07292
1700112E06Rik	O31	4.23958
Fars2	O31	4.3125
Fars2	O31	4.47917
Eras	O31	6.42708
1700112E06Rik	O31	9.55208
1700112E06Rik	O31	12.125
Fars2	O31	37.25
Akt1	O315	0.5
Kcnb1	O315	0.5
Akt1	O315	0.555556
Map4k3	O315	0.555556
Arl4c	O315	0.611111
Igsf8	O315	0.722222
Arl4c	O315	0.722222
RP23-191F22.5	O315	0.777778
Ppp2r2b	O315	0.833333
Rpl6	O315	0.888889
Smc1a	O315	0.888889
9030625A04Rik	O315	0.944444
Igsf8	O315	1
Sash1	O315	1.66667
S1pr1	O315	1.77778
Pdgfra	O315	2.22222
Sash1	O315	2.5
Notch2	O315	2.5
Capzb	O315	4.16667
Arl4c	O315	4.83333
Capzb	O315	5.83333
Pdgfra	O315	9.11111
SNORA17	O374-1	0.548387
Sema5a	O374-1	0.548387
2310008H09Rik	O374-1	0.580645
Sema5a	O374-1	0.612903
Fgfr2	O374-1	0.645161
Sema5a	O374-1	0.645161
Tas2r119	O374-1	0.677419
Tas2r119	O374-1	0.677419
Sema5a	O374-1	0.677419
SNORA17	O374-1	0.774194
Mto1	O374-1	0.967742
Mto1	O374-1	1
Rnf19a	O374-1	1
Mto1	O374-1	1.03226
Mto1	O374-1	1.48387
Myc	O374-1	1.48387
Tas2r119	O374-1	1.74194
Unc93a	O374-1	1.80645
Sema5a	O374-1	2.48387
Tas2r119	O374-1	2.77419
Myc	O374-1	2.93548
Slbp	O374-1	3.09677
AI314180	O374-1	3.87097
Fgfr2	O374-1	4
Myc	O374-1	4.3871
Mto1	O374-1	4.64516
Hadha	O374-1	5.83871
Hadha	O374-1	5.90323
Tas2r119	O374-1	11.7419
Gm9992	O374-1	13.2258
Tas2r119	O374-1	13.5484
Fgfr2	O374-1	16.9677
Myc	O374-1	29.5484
Tarbp2	O380	0.5
Ptp4a2	O380	0.55
Csf1r	O380	0.6
Nf2	O380	0.6
Tarbp2	O380	0.65
Nf2	O380	0.7
AC102874.1	O380	0.8
Sfrs9	O380	0.8
Nptn	O380	1.35
Zbtb20	O380	1.6
Ndufs5	O380	1.6
Nsmce2	O380	1.85
Sfrs9	O380	3.7
Nptn	O380	11
Nptn	O380	12.1
Arid2	O417	0.5
Pnkd	O417	0.722222
Smarcc1	O417	0.759259
Ksr1	O417	0.759259
Qrich1	O417	0.796296
St3gal4	O417	0.87037
Nf2	O417	1.11111
Rpl18a	O417	1.18519
Ptpn13	O417	2.24074
Asap1	O417	2.66667
Ptpn13	O417	2.66667
2310036O22Rik	O417	4.81481
Wisp1	O417	16.1481
Rpgrip1	O73	0.5
Cdc42	O73	0.5
Phactr1	O73	0.517241
Kalrn	O73	0.517241
Keap1	O73	0.517241
Hnrnpm	O73	0.534483
Prune2	O73	0.551724
Zfp710	O73	0.603448
SNORA70	O73	0.62069
Kalrn	O73	0.689655
Zfand3	O73	0.689655
Kalrn	O73	0.724138
Acsl4	O73	0.758621
Map3k5	O73	0.793103
Hdac9	O73	0.793103
Map3k5	O73	0.810345
RP23-9O13.8	O73	0.810345
SNORA70	O73	0.844828
Il3ra	O73	0.862069
Braf	O73	0.862069
Robo2	O73	0.913793
Hnrnpm	O73	0.931034
Map3k5	O73	0.948276
Kalrn	O73	0.965517
Acvr1	O73	1.06897
Mcph1	O73	1.06897
Igfn1	O73	1.10345
Hectd1	O73	1.13793
Rapgef2	O73	1.13793
Hsn2	O73	1.15517
Eras	O73	1.22414
Cdc42	O73	1.2931
Robo2	O73	1.34483
Lhfp	O73	1.41379
Maml3	O73	1.44828
Braf	O73	1.51724
Acvr1	O73	1.68966
Igfn1	O73	1.7931
Smg6	O73	1.81034
Kalrn	O73	1.98276
Gsk3b	O73	2
Gsk3b	O73	2.01724
Hnrnpm	O73	2.03448
Hsn2	O73	2.12069
Keap1	O73	2.2069
Mcph1	O73	2.34483
Keap1	O73	2.77586
Mef2a	O73	2.87931
Helt	O73	2.94828
Phactr1	O73	3.27586
Lrrc19	O73	3.27586
Phactr1	O73	3.98276
Dcaf12	O73	4
Lef1	O73	4.01724
Hsn2	O73	4.05172
Lhfp	O73	4.2069
Gsk3b	O73	4.34483
SNORA70	O73	4.63793
Phactr1	O73	4.86207
Lims2	O73	5.31034
Pparg	O73	5.7931
Mcph1	O73	6.34483
Lhfp	O73	6.58621
Cdkn2a	O73	6.58621
SNORA70	O73	6.91379
Smg6	O73	14.2586
Spcs1	O73	16.3103
Hnrnpm	O73	16.9138
AC101777.1	O73	17.6897
Cdc42	O73	18.431
Spcs1	O73	22.0345
Dcaf12	O73	25.8621
Eras	O73	29.5862
AC101777.1	O73	53.9483
Cdkn2a	O73	87.8448
Zbtb25	O74	0.515789
Tnfrsf21	O74	0.536842
Zbtb1	O74	0.684211
Pten	O74	0.705263
Tshz1	O74	0.715789
Fgfr2	O74	0.789474
Serbp1	O74	0.8
Asap1	O82	0.541667
Kif5b	O82	0.583333
Zfhx4	O82	0.833333
Tial1	O82	0.833333
Kif5b	O82	0.875
Bcar3	O82	0.916667
Anp32a	O82	1.70833
Anp32a	O82	1.95833

## Sheet: S3-reLMPCR
Supplemental Table 1
chr	start	stop	tumor	count	orient	gene	fusion_support	shear_support
chr8	97561650	97561750	O109	20726	+	Gpr97	NO	NO
chr7	123208950	123209050	O109	8141	+	AC160535.2	NO	NO
chrX	143707150	143707250	O109	7790	-	Htr2c	NO	NO
chr9	75369650	75369750	O109	7325	-	Tmod3	YES	NO
chr15	78237850	78237950	O109	6661	+	Mpst	NO	NO
chr8	12581850	12581950	O109	5012	-	1700094C09Rik	NO	NO
chr9	64687950	64688050	O109	3636	+	Dennd4a	NO	NO
chr7	120531150	120531250	O109	1991	-	Pth	YES	NO
chr13	51502950	51503050	O109	1652	-	S1pr3	NO	NO
chr1	163553450	163553550	O109	1641	-	5S_rRNA	NO	NO
chr1	157445050	157445150	O109	1521	+	Acbd6	NO	NO
chr1	192183750	192183850	O109	1443	-	Prox1	NO	NO
chr5	132810350	132810450	O109	1438	+	Auts2	NO	NO
chr18	21934850	21934950	O109	1302	-	4921528I01Rik	NO	NO
chr19	45025450	45025550	O109	1098	+	Fam178a	NO	NO
chrX	74840650	74840750	O109	1088	-	Tbl1x	NO	NO
chr7	123249650	123249750	O109	1068	-	1110004F10Rik	NO	NO
chr12	52906650	52906750	O109	1034	-	Hectd1	NO	NO
chr1	132321750	132321850	O109	1026	+	AC111067.3	NO	NO
chr1	67567050	67567150	O109	996	-	Kif22-ps	NO	NO
chrX	55715150	55715250	O109	932	-	RP23-44A17.2	NO	NO
chr5	89172050	89172150	O109	908	-	Mobkl1a	NO	NO
chr8	115508150	115508250	O109	905	-	Cntnap4	NO	NO
chr8	5402450	5402550	O109	858	+	5S_rRNA	NO	NO
chr1	24045550	24045650	O109	850	-	Fam135a	NO	NO
chr4	53152850	53152950	O109	803	+	Abca1	YES	NO
chr14	14875250	14875350	O109	766	+	Atxn7	NO	NO
chr4	148782450	148782550	O109	745	+	Ube4b	NO	NO
chr1	157009050	157009150	O109	719	+	Stx6	NO	NO
chr1	195895250	195895350	O109	673	+	Plxna2	NO	NO
chr12	113195950	113196050	O109	598	-	2010107E04Rik	NO	NO
chr16	89747550	89747650	O109	596	-	Tiam1	NO	NO
chr1	122725950	122726050	O109	572	-	En1	NO	NO
chr4	93850150	93850250	O109	549	-	RP23-108L1.2	NO	NO
chr18	14248950	14249050	O109	504	+	Zfp521	NO	NO
chr1	163683250	163683350	O109	464	-	AC133589.1	NO	NO
chr14	35556650	35556750	O109	311	+	Wapal	NO	NO
chr1	54767650	54767750	O109	308	-	Ankrd44	NO	NO
chr3	44295550	44295650	O109	271	+	U6	NO	NO
chr2	60898950	60899050	O109	265	+	RP23-318H20.2	NO	NO
chr15	81183350	81183450	O109	253	-	Slc25a17	NO	NO
chr9	4122550	4122650	O109	239	-	AC115802.1	NO	NO
chr1	138211450	138211550	O109	212	-	Camsap1l1	NO	NO
chr19	29100250	29100350	O109	200	+	Ak3	NO	NO
chr13	118725150	118725250	O109	200	-	Hcn1	NO	NO
chr1	29921550	29921650	O109	199	+	AC126798.1	NO	NO
chr16	82223250	82223350	O109	197	+	U6	NO	NO
chr7	122848050	122848150	O109	178	-	Sox6	YES	NO
chr17	80988250	80988350	O109	173	+	Map4k3	NO	NO
chr1	89787250	89787350	O109	166	+	Dgkd	NO	NO
chr9	115213950	115214050	O109	159	+	Stt3b	NO	NO
chr7	108975250	108975350	O109	158	+	Inppl1	NO	NO
chr6	96649350	96649450	O109	153	-	Fam19a1	NO	NO
chr1	159766050	159766150	O109	146	-	AC161108.1	NO	NO
chr13	80332850	80332950	O109	140	+	U4	NO	NO
chr9	91093750	91093850	O109	139	+	AC152825.1	NO	NO
chr3	152907350	152907450	O109	137	+	St6galnac3	NO	NO
chr8	83338750	83338850	O109	130	-	Gab1	NO	NO
chr10	16997050	16997150	O109	125	+	U6	NO	NO
chr7	107812450	107812550	O109	120	+	Plekhb1	NO	NO
chr3	4775450	4775550	O109	118	+	SNORA38	NO	NO
chr5	20548250	20548350	O109	114	+	Ptpn12	NO	NO
chr1	190925750	190925850	O109	110	+	Kctd3	NO	NO
chr11	42103050	42103150	O109	108	+	Gabra6	NO	NO
chr3	8799550	8799650	O109	102	+	Mrps28	NO	NO
chr1	141126350	141126450	O109	101	-	Crb1	NO	NO
chr10	31844350	31844450	O109	98	-	AC126430.1	NO	NO
chr1	173964850	173964950	O109	84	+	Vangl2	NO	NO
chr1	132763150	132763250	O109	68	-	Faim3	NO	NO
chr16	20937650	20937750	O109	63	-	2310042E22Rik	NO	NO
chr1	161219550	161219650	O109	60	+	Rfwd2	YES	NO
chr4	56787850	56787950	O109	58	+	Ikbkap	NO	NO
chr1	138995950	138996050	O109	56	+	U7	NO	NO
chr1	89009350	89009450	O109	53	-	Alpi	NO	NO
chr13	29924050	29924150	O109	53	-	Cdkal1	NO	NO
chr15	20209450	20209550	O109	53	+	SNORA17	NO	NO
chr4	24003850	24003950	O109	47	+	RP23-402C17.1	NO	NO
chr15	27899750	27899850	O109	47	-	Trio	NO	NO
chr12	94871750	94871850	O109	46	-	U1	NO	NO
chr18	3957650	3957750	O109	45	-	7SK	NO	NO
chr11	115557250	115557350	O109	42	+	Grb2	NO	NO
chr18	4908750	4908850	O109	39	-	Svil	NO	NO
chr7	74436850	74436950	O109	36	+	Mef2a	NO	NO
chr10	5950750	5950850	O109	31	+	Rmnd1	NO	NO
chr1	124744250	124744350	O109	30	+	AC107678.1	NO	NO
chr10	57318050	57318150	O109	28	-	Pkib	NO	NO
chr1	17501850	17501950	O109	27	+	SNORA17	NO	NO
chr4	132197550	132197650	O109	23	+	Eya3	NO	NO
chr13	109697450	109697550	O109	23	+	Pde4d	NO	NO
chr1	114348150	114348250	O109	21	-	SNORA68	NO	NO
chr16	16597850	16597950	O109	20	-	Fgd4	NO	NO
chr14	107982650	107982750	O109	20	+	SNORA17	NO	NO
chr5	97208250	97208350	O109	19	+	Fras1	NO	NO
chr6	135675750	135675850	O109	18	+	Grin2b	NO	NO
chr1	179065950	179066050	O109	17	-	Akt3	NO	NO
chr1	153456850	153456950	O109	17	-	Fam129a	YES	NO
chr10	125771350	125771450	O109	17	+	Lrig3	NO	NO
chrX	105675050	105675150	O109	16	-	RP23-119K17.1	NO	NO
chr2	121821750	121821850	O112	39938	+	Ctdspl2	YES	NO
chr4	122669450	122669550	O112	37049	-	Mycl1	YES	NO
chr1	121379750	121379850	O112	23511	+	Ralb	YES	NO
chr13	9749950	9750050	O112	22476	+	Zmynd11	YES	NO
chr10	12470250	12470350	O112	18089	-	Utrn	YES	NO
chr5	24385450	24385550	O112	17747	-	Prkag2	YES	NO
chr4	3336150	3336250	O112	11504	-	RP23-461P20.1	YES	NO
chr12	105286050	105286150	O112	8714	-	Serpina12	YES	NO
chr14	26344750	26344850	O112	7406	+	Zmiz1	YES	NO
chr10	104960450	104960550	O112	7338	+	Tmtc2	YES	NO
chr10	66564850	66564950	O112	6889	+	Reep3	YES	NO
chr5	34363750	34363850	O112	6109	-	Poln	YES	NO
chr12	105717950	105718050	O112	5139	+	Gm10000	NO	NO
chr19	3875950	3876050	O112	4500	-	Chka	YES	NO
chr17	40994350	40994450	O112	4475	-	Rhag	NO	NO
chr9	110458850	110458950	O112	4179	+	Setd2	YES	NO
chr14	120772250	120772350	O112	4123	+	Mbnl2	YES	NO
chr5	36490650	36490750	O112	3939	+	Sorcs2	YES	NO
chr4	117243550	117243650	O112	3909	-	Eri3	YES	NO
chr2	163468350	163468450	O112	3896	-	AL591488.2	NO	NO
chr5	24841350	24841450	O112	2766	+	Mll3	YES	NO
chr2	124442550	124442650	O112	2739	+	Sema6d	YES	NO
chr17	46377750	46377850	O112	2508	-	Xpo5	YES	NO
chr4	8508150	8508250	O112	2175	-	Rab2a	YES	NO
chr8	83398650	83398750	O112	2077	-	Gab1	YES	NO
chr7	141306950	141307050	O112	1771	+	Adam12	NO	NO
chr12	109301250	109301350	O112	1722	+	Setd3	YES	NO
chr16	90365050	90365150	O112	1630	+	Hunk	YES	NO
chr5	44595250	44595350	O112	1071	+	Tapt1	YES	NO
chr1	181471150	181471250	O112	960	+	Tfb2m	YES	NO
chr18	22567750	22567850	O112	956	+	Asxl3	YES	NO
chr19	38914250	38914350	O112	910	-	Tbc1d12	NO	NO
chr11	97321650	97321750	O112	777	+	Arhgap23	NO	NO
chrX	139422050	139422150	O112	624	+	Ammecr1	YES	NO
chr4	82894850	82894950	O112	561	+	Ttc39b	NO	NO
chr13	32699250	32699350	O112	497	+	Mylk4	NO	NO
chr17	46258750	46258850	O112	458	-	Mrps18a	YES	NO
chr6	52647250	52647350	O112	386	+	Tax1bp1	NO	NO
chr18	22409850	22409950	O112	354	-	AC105067.1	NO	NO
chr1	64494250	64494350	O112	351	-	Creb1	YES	NO
chr3	119435350	119435450	O112	347	-	Ptbp2	NO	NO
chr4	138992250	138992350	O112	316	+	Ubr4	NO	NO
chr14	28157350	28157450	O112	306	+	Arhgef3	NO	NO
chr11	74487250	74487350	O112	275	-	Pafah1b1	NO	NO
chr4	87290650	87290750	O112	268	-	RP24-541E15.1	NO	NO
chr4	73208050	73208150	O112	262	+	SNORA17	NO	NO
chr10	58259450	58259550	O112	235	+	AC153367.1	NO	NO
chr16	45182250	45182350	O112	226	+	Atg3	NO	NO
chr2	131967350	131967450	O112	211	-	Slc23a2	NO	NO
chr4	149770950	149771050	O112	201	-	Rere	YES	NO
chr9	63779750	63779850	O112	137	+	Smad6	NO	NO
chr8	90686550	90686650	O112	123	+	Heatr3	YES	NO
chr5	130205850	130205950	O112	107	+	AC114657.2	NO	NO
chr15	79372750	79372850	O112	81	-	Ddx17	NO	NO
chr7	82774050	82774150	O112	66	+	Akap13	NO	NO
chr13	49787950	49788050	O112	60	+	Iars	YES	NO
chr4	11163450	11163550	O112	46	+	Ints8	YES	NO
chr1	154821750	154821850	O112	43	+	Nmnat2	YES	NO
chr13	12915050	12915150	O112	41	+	Prl2c3	NO	NO
chr16	72329950	72330050	O112	41	+	Robo1	NO	NO
chr16	90358950	90359050	O112	40	+	Hunk	YES	NO
chr7	46986950	46987050	O112	39	+	U6	NO	NO
chr7	88366850	88366950	O112	33	+	Pde8a	YES	NO
chr15	72373750	72373850	O165	140885	-	Kcnk9	NO	NO
chr4	75908050	75908150	O165	31875	+	Ptprd	YES	NO
chr4	47382250	47382350	O165	29648	-	Tgfbr1	YES	NO
chr7	119190250	119190350	O165	19926	-	Usp47	YES	NO
chr2	58400650	58400750	O165	13056	+	Acvr1	NO	NO
chr11	19616150	19616250	O165	10889	-	Glns-ps1	YES	NO
chr9	70332850	70332950	O165	10067	-	Rnf111	YES	NO
chr14	48276850	48276950	O165	9530	+	Ktn1	NO	NO
chr10	114858650	114858750	O165	8168	+	Zfc3h1	YES	NO
chr14	63745550	63745650	O165	7785	+	Ctsb	NO	NO
chr15	12431550	12431650	O165	7730	-	Pdzd2	NO	NO
chr10	12397150	12397250	O165	7147	+	Utrn	NO	NO
chr2	155936850	155936950	O165	6329	-	Rbm12	YES	NO
chr17	62963450	62963550	O165	6039	+	Efna5	NO	NO
chr4	138812550	138812650	O165	4532	-	Capzb	YES	NO
chr2	39054850	39054950	O165	4216	+	Ppp6c	NO	NO
chr8	93660550	93660650	O165	3885	-	Aktip	YES	NO
chr18	57537150	57537250	O165	3763	+	AC152398.1	YES	NO
chr5	3529650	3529750	O165	3476	-	Cdk6	NO	NO
chr2	127100950	127101050	O165	3155	-	Stard7	NO	NO
chr16	32855450	32855550	O165	3054	-	1700021K19Rik	YES	NO
chr18	42723350	42723450	O165	3021	-	Tcerg1	NO	NO
chr3	152092750	152092850	O165	2982	+	Zzz3	YES	NO
chr8	90681150	90681250	O165	2848	+	Heatr3	YES	NO
chr12	13227250	13227350	O165	2805	-	Ddx1	NO	NO
chr4	58597950	58598050	O165	2542	-	RP23-107J3.2	NO	NO
chr18	6506650	6506750	O165	2336	+	Epc1	NO	NO
chr11	4718450	4718550	O165	2313	-	Nf2	YES	NO
chr6	65042150	65042250	O165	2215	+	Smarcad1	YES	NO
chr11	4694350	4694450	O165	2106	+	Nf2	YES	NO
chr2	125679650	125679750	O165	2100	-	Cops2	NO	NO
chr15	81447250	81447350	O165	1962	-	Ep300	YES	NO
chr1	34111250	34111350	O165	1820	+	Dst	NO	NO
chr15	17696050	17696150	O165	1802	+	7SK	NO	NO
chr9	122129650	122129750	O165	1742	-	Ano10	NO	NO
chr6	112558450	112558550	O165	1731	+	RP24-350P11.3	NO	NO
chr2	5793350	5793450	O165	1716	-	Sec61a2	YES	NO
chr11	120258350	120258450	O165	1481	+	Nploc4	NO	NO
chr16	71975650	71975750	O165	1460	-	SNORA71	NO	NO
chr10	53047250	53047350	O165	1448	-	Gm9766	NO	NO
chr1	173535450	173535550	O165	1403	+	Ly9	NO	NO
chr5	71184550	71184650	O165	1373	+	Gabrg1	NO	NO
chr1	25954850	25954950	O165	1303	-	Gm9884	NO	NO
chr18	38587350	38587450	O165	1285	+	Ndfip1	NO	NO
chr4	53742150	53742250	O165	1268	+	Fktn	NO	NO
chr13	48929750	48929850	O165	1256	-	Phf2	NO	NO
chr14	23644250	23644350	O165	1254	+	1700112E06Rik	NO	NO
chr16	57125150	57125250	O165	1253	-	Tomm70a	NO	NO
chr14	35772050	35772150	O165	1250	+	Grid1	NO	NO
chr17	33775350	33775450	O165	1249	-	Pram1	NO	NO
chr16	37770450	37770550	O165	1247	-	Fstl1	NO	NO
chr5	93864650	93864750	O165	1204	-	AC125148.1	NO	NO
chr10	104908250	104908350	O165	1160	+	Tmtc2	NO	NO
chr6	90155350	90155450	O165	1132	-	V1ra8	NO	NO
chr3	32318750	32318850	O165	1130	-	Pik3ca	NO	NO
chr13	63618850	63618950	O165	1124	-	Ptch1	NO	NO
chr2	145619850	145619950	O165	1076	+	Rin2	NO	NO
chr2	155246550	155246650	O165	1046	+	Ncoa6	YES	NO
chr17	38793150	38793250	O165	1017	-	Olfr136	NO	NO
chrX	155744350	155744450	O165	1011	-	Rps6ka3	NO	NO
chr5	46047850	46047950	O165	1006	+	AC093341.1	NO	NO
chr3	89054150	89054250	O165	987	-	Krtcap2	NO	NO
chr3	7665550	7665650	O165	978	+	AC140984.1	NO	NO
chr14	64030650	64030750	O165	954	-	Blk	NO	NO
chr4	116320450	116320550	O165	935	-	Akr1a4	NO	NO
chr11	4602950	4603050	O165	924	+	Uqcr10	NO	NO
chr10	128822950	128823050	O165	903	-	Olfr784	NO	NO
chr3	133519450	133519550	O165	902	-	AC158953.1	NO	NO
chr16	77449050	77449150	O165	901	-	AC122281.1	NO	NO
chr7	14727450	14727550	O165	901	-	AC125016.2	NO	NO
chr15	45233650	45233750	O165	887	+	Kcnv1	NO	NO
chr9	101008450	101008550	O165	877	+	Ppp2r3a	NO	NO
chr12	110049650	110049750	O165	874	-	Yy1	NO	NO
chr1	196929750	196929850	O165	858	+	Cr1l	NO	NO
chr2	43276150	43276250	O165	855	-	RP23-391P24.1	NO	NO
chr9	83508250	83508350	O165	854	+	Sh3bgrl2	NO	NO
chr2	71261250	71261350	O165	847	-	Hat1	NO	NO
chr3	116359150	116359250	O165	841	+	Hiat1	NO	NO
chr11	88181150	88181250	O165	836	+	Msi2	NO	NO
chr8	75687850	75687950	O165	826	-	Large	NO	NO
chr2	4498050	4498150	O165	825	+	Frmd4a	YES	NO
chr15	94706250	94706350	O165	819	-	Tmem117	NO	NO
chr14	19688350	19688450	O165	815	-	Ube2e2	NO	NO
chr2	106388750	106388850	O165	810	-	RP23-253D15.1	NO	NO
chr9	105558250	105558350	O165	809	-	Pik3r4	NO	NO
chr12	113042150	113042250	O165	803	+	Xrcc3	NO	NO
chr9	48993250	48993350	O165	803	+	Gm4894	NO	NO
chr5	106308050	106308150	O165	800	+	Zfp326	NO	NO
chr2	119565450	119565550	O165	799	-	SNORA44	NO	NO
chr2	93983050	93983150	O165	798	+	Hsd17b12	NO	NO
chr8	75807950	75808050	O165	794	-	Large	NO	NO
chr2	150812350	150812450	O165	792	+	Ninl	NO	NO
chr2	155242350	155242450	O165	788	-	Ncoa6	YES	NO
chr19	13706650	13706750	O165	783	+	Olfr1489	NO	NO
chr11	85591050	85591150	O165	770	+	Bcas3	NO	NO
chr17	28389850	28389950	O165	769	-	Ppard	NO	NO
chr10	128374250	128374350	O165	764	-	Itga7	NO	NO
chr16	88917650	88917750	O165	761	-	AC140194.4	NO	NO
chr2	118219750	118219850	O165	755	+	Eif2ak4	NO	NO
chr17	68286350	68286450	O165	754	-	Arhgap28	NO	NO
chr10	14709750	14709850	O165	744	+	SNORA17	NO	NO
chr6	93339650	93339750	O165	742	-	SNORA17	NO	NO
chr4	119032650	119032750	O165	739	+	Ccdc30	NO	NO
chr8	13161150	13161250	O165	738	+	Lamp1	YES	NO
chr13	34132550	34132650	O165	719	+	Bphl	NO	NO
chr17	83905150	83905250	O165	718	-	Cox7a2l	NO	NO
chr15	64322450	64322550	O165	708	-	Gm10926	NO	NO
chr4	78364750	78364850	O165	708	+	RP23-189G9.2	NO	NO
chr1	19739650	19739750	O165	700	+	AC163028.1	NO	NO
chr6	65850850	65850950	O165	696	-	Prdm5	NO	NO
chr14	12469650	12469750	O165	685	-	Ptprg	NO	NO
chr3	101250050	101250150	O165	685	+	Igsf3	NO	NO
chr14	93809350	93809450	O165	683	-	Pcdh9	NO	NO
chr19	53220050	53220150	O165	678	-	Add3	NO	NO
chr1	174036650	174036750	O165	673	+	Copa	YES	NO
chr11	45842150	45842250	O165	671	+	Sox30	NO	NO
chr1	5091050	5091150	O165	661	-	Atp6v1h	NO	NO
chr19	60269250	60269350	O165	660	-	D19Ertd737e	NO	NO
chr4	148340450	148340550	O165	660	+	Pex14	NO	NO
chr14	69060950	69061050	O165	657	-	Adam7	NO	NO
chr10	61967850	61967950	O165	653	-	Srgn	NO	NO
chr3	35829050	35829150	O165	647	+	Dcun1d1	NO	NO
chr17	20634650	20634750	O165	643	+	Vmn1r225	NO	NO
chr7	73034250	73034350	O165	627	-	Pcsk6	NO	NO
chr14	121318450	121318550	O165	625	-	Ipo5	NO	NO
chr10	61765450	61765550	O165	612	+	Hk1	NO	NO
chr6	57705450	57705550	O165	612	-	Vopp1	NO	NO
chr4	45017650	45017750	O165	611	+	Zbtb5	NO	NO
chr11	80337150	80337250	O165	606	-	Myo1d	NO	NO
chr6	62581150	62581250	O165	606	-	U7	NO	NO
chr3	39329550	39329650	O165	603	-	AC107701.1	NO	NO
chr8	108307750	108307850	O165	601	+	Ranbp10	NO	NO
chr10	85676150	85676250	O165	595	+	Syn3	NO	NO
chr1	67341550	67341650	O165	593	+	AC133161.1	NO	NO
chr11	8346250	8346350	O165	593	-	Tns3	NO	NO
chr15	69199750	69199850	O165	593	-	SNORA17	NO	NO
chr7	106422550	106422650	O165	589	+	Mtap6	NO	NO
chr1	25256550	25256650	O165	585	-	Bai3	NO	NO
chr3	145791650	145791750	O165	580	+	Mcoln3	NO	NO
chr5	7773850	7773950	O165	570	-	AC133514.1	NO	NO
chr1	51372650	51372750	O165	562	+	Sdpr	NO	NO
chr1	174097550	174097650	O165	561	+	Dcaf8	YES	NO
chr6	18011350	18011450	O165	557	+	Asz1	NO	NO
chr1	102376650	102376750	O165	556	-	Cntnap5b	NO	NO
chr14	81952050	81952150	O165	554	+	U1	NO	NO
chr5	28979850	28979950	O165	553	-	AC121843.1	NO	NO
chr5	123045050	123045150	O165	550	-	Ift81	YES	NO
chr14	79521550	79521650	O165	544	-	1300010F03Rik	NO	NO
chr6	87779950	87780050	O165	538	-	Isy1	NO	NO
chr16	49889350	49889450	O165	538	-	Cd47	NO	NO
chr4	109582750	109582850	O165	529	-	Faf1	NO	NO
chrX	48547850	48547950	O165	506	-	Mbnl3	NO	NO
chr8	87145450	87145550	O165	499	+	Cacna1a	NO	NO
chr10	45565650	45565750	O165	497	-	AC153368.1	NO	NO
chr6	140415450	140415550	O165	496	+	Plekha5	NO	NO
chr15	97720650	97720750	O165	496	+	Vdr	NO	NO
chr4	74911550	74911650	O165	491	+	3110001D03Rik	NO	NO
chr17	56541050	56541150	O165	489	-	Kdm4b	NO	NO
chr1	92915150	92915250	O165	488	+	Lrrfip1	NO	NO
chr18	34607450	34607550	O165	486	+	Fam13b	NO	NO
chr5	128928050	128928150	O165	485	+	Tmem132d	NO	NO
chr4	41214850	41214950	O165	466	+	Ubap2	NO	NO
chr16	4916150	4916250	O165	461	-	Mgrn1	NO	NO
chr17	50682450	50682550	O165	453	-	Plcl2	NO	NO
chr16	20830450	20830550	O165	453	+	RP23-148P12.3	NO	NO
chr17	38006050	38006150	O165	449	-	Olfr126	NO	NO
chr6	119868150	119868250	O165	448	-	Rad52	NO	NO
chr16	3757150	3757250	O165	447	+	Zfp263	NO	NO
chr19	5208850	5208950	O165	445	+	Pacs1	NO	NO
chr18	63853050	63853150	O165	444	+	Txnl1	NO	NO
chr15	12517150	12517250	O165	444	-	Pdzd2	NO	NO
chr5	65877550	65877650	O165	442	+	1110003E01Rik	NO	NO
chr16	34533550	34533650	O165	438	+	Kalrn	NO	NO
chr16	36833950	36834050	O165	437	+	Iqcb1	NO	NO
chr7	91787150	91787250	O165	434	-	Zfand6	NO	NO
chr8	71914550	71914650	O165	432	-	RNaseP_nuc	NO	NO
chr3	93345850	93345950	O165	427	+	S100a10	NO	NO
chr14	69830450	69830550	O165	423	+	Slc25a37	NO	NO
chr6	135771650	135771750	O165	421	+	Grin2b	NO	NO
chr12	39999150	39999250	O165	420	-	U7	NO	NO
chr1	120829350	120829450	O165	415	-	Gli2	NO	NO
chr6	108927850	108927950	O165	415	-	AC132350.1	NO	NO
chr6	124292150	124292250	O165	412	-	1700013D24Rik	NO	NO
chr17	16605350	16605450	O165	412	+	AC154306.1	NO	NO
chr3	85911350	85911450	O165	411	+	Sh3d19	NO	NO
chr8	27185150	27185250	O165	409	-	Hook3	NO	NO
chr3	44647550	44647650	O165	409	+	U6	NO	NO
chr6	9296550	9296650	O165	403	+	Nxph1	NO	NO
chr3	88561550	88561650	O165	397	-	Syt11	NO	NO
chr14	66188550	66188650	O165	395	-	Elp3	NO	NO
chr16	8085750	8085850	O165	393	+	7SK	NO	NO
chr10	39694150	39694250	O165	372	-	BC021785	NO	NO
chr7	107084250	107084350	O165	371	+	Rnf169	NO	NO
chr1	77137950	77138050	O165	370	+	5S_rRNA	NO	NO
chr7	114820150	114820250	O165	368	+	Ppfibp2	NO	NO
chr8	110705750	110705850	O165	366	-	AC122865.1	NO	NO
chr12	82052550	82052650	O165	365	-	Sfrs5	YES	NO
chr3	144234150	144234250	O165	365	+	2015-09-15	NO	NO
chr12	79322850	79322950	O165	362	+	Gphn	NO	NO
chr4	149718150	149718250	O165	358	-	Rere	NO	NO
chr5	34357650	34357750	O165	355	-	Poln	NO	NO
chr7	121986150	121986250	O165	354	-	Insc	NO	NO
chr5	81902750	81902850	O165	351	+	Lphn3	NO	NO
chr11	114593050	114593150	O165	351	+	Dnaic2	NO	NO
chr5	31524150	31524250	O165	349	+	Ppm1g	NO	NO
chr5	117503350	117503450	O165	347	+	Suds3	NO	NO
chr16	43419150	43419250	O165	344	-	Zbtb20	NO	NO
chr18	7904350	7904450	O165	341	-	Wac	NO	NO
chr19	13155850	13155950	O165	340	+	AC163722.1	NO	NO
chr9	70329250	70329350	O165	339	+	Rnf111	YES	NO
chr16	7125050	7125150	O165	339	+	A2bp1	NO	NO
chr11	5834450	5834550	O165	339	-	Gck	NO	NO
chr6	121720450	121720550	O165	334	+	Mug1	NO	NO
chr3	13607950	13608050	O165	333	+	Ralyl	NO	NO
chr2	47797750	47797850	O165	332	-	RP23-49G18.1	NO	NO
chr10	42402450	42402550	O165	325	-	Ostm1	NO	NO
chrX	11617750	11617850	O165	324	-	Bcor	YES	NO
chr3	40124250	40124350	O165	321	+	1700017G19Rik	NO	NO
chr17	53981950	53982050	O165	319	+	Sult1c2	NO	NO
chr3	40418950	40419050	O165	318	+	1700017G19Rik	NO	NO
chr4	110239050	110239150	O165	317	+	Agbl4	NO	NO
chr4	119426350	119426450	O165	315	-	AL606916.1	NO	NO
chr17	66218750	66218850	O165	310	+	Ralbp1	YES	NO
chr6	83897350	83897450	O165	307	+	Zfml	YES	NO
chr19	23792650	23792750	O165	305	+	AC134830.1	NO	NO
chr5	35027150	35027250	O165	302	+	Grk4	NO	NO
chr8	42378750	42378850	O165	301	+	Pcm1	NO	NO
chr4	148372050	148372150	O165	300	+	Pex14	NO	NO
chr8	27125250	27125350	O165	294	-	Fnta	NO	NO
chr2	180726250	180726350	O165	292	-	Col20a1	NO	NO
chr2	130842750	130842850	O165	290	+	Atrn	NO	NO
chr1	14881850	14881950	O165	284	+	Trpa1	NO	NO
chr10	53046850	53046950	O165	281	+	Gm9766	NO	NO
chr6	58385850	58385950	O165	277	-	Vmn1r30	NO	NO
chr5	55963650	55963750	O165	274	-	AC107721.1	NO	NO
chr16	34970450	34970550	O165	272	-	Mylk	NO	NO
chr15	23119750	23119850	O165	270	+	Cdh18	NO	NO
chrX	115891850	115891950	O165	269	+	RP23-143K9.1	NO	NO
chr1	127109950	127110050	O165	266	-	Actr3	NO	NO
chr11	51916850	51916950	O165	263	-	AL669920.2	NO	NO
chr16	36880450	36880550	O165	263	-	Golgb1	NO	NO
chr8	116879550	116879650	O165	261	-	Vat1l	NO	NO
chr4	68816750	68816850	O165	261	+	U6	NO	NO
chr17	3245050	3245150	O165	260	-	Rbm16	NO	NO
chr1	5090450	5090550	O165	260	-	Atp6v1h	NO	NO
chr17	66478950	66479050	O165	259	-	Ddx11	NO	NO
chr4	35882450	35882550	O165	258	+	Lingo2	NO	NO
chr11	60066650	60066750	O165	258	-	Tom1l2	NO	NO
chr1	128843450	128843550	O165	256	+	Nckap5	NO	NO
chr3	91338450	91338550	O165	256	-	AC127257.1	NO	NO
chr15	7046350	7046450	O165	255	-	Gm10050	YES	NO
chrX	49335450	49335550	O165	254	+	1700080O16Rik	NO	NO
chr10	62807850	62807950	O165	253	-	Sirt1	NO	NO
chr17	26041050	26041150	O165	251	-	Rab40c	NO	NO
chr5	73994550	73994650	O165	250	-	Lrrc66	NO	NO
chr3	7826350	7826450	O165	250	-	AC140984.1	NO	NO
chr18	76184950	76185050	O165	243	+	Zbtb7c	NO	NO
chr7	148059950	148060050	O165	238	-	Sirt3	NO	NO
chr6	88572350	88572450	O165	237	+	Klhdc6	NO	NO
chr3	27979450	27979550	O165	236	-	Pld1	NO	NO
chr17	28040450	28040550	O165	236	+	Taf11	YES	NO
chr7	119189850	119189950	O165	235	+	Usp47	YES	NO
chr11	14903950	14904050	O165	235	+	RP23-338K15.1	NO	NO
chr10	86047050	86047150	O165	234	+	Syn3	NO	NO
chr9	61768450	61768550	O165	231	+	Kif23	NO	NO
chr15	34029650	34029750	O165	230	-	Mtdh	NO	NO
chr4	41089850	41089950	O165	230	-	Ube2r2	YES	NO
chr8	54269550	54269650	O165	229	-	SNORA17	NO	NO
chr15	58897950	58898050	O165	229	+	Mtss1	NO	NO
chr6	35001550	35001650	O165	227	-	Cnot4	NO	NO
chr19	32399350	32399450	O165	225	+	Sgms1	NO	NO
chr7	127036650	127036750	O165	224	+	Dcun1d3	NO	NO
chr3	123032150	123032250	O165	222	-	Sec24d	NO	NO
chr8	34381150	34381250	O165	222	+	Wrn	NO	NO
chr2	70477050	70477150	O165	219	+	AC097273.7	NO	NO
chr4	92584150	92584250	O165	219	-	U6	NO	NO
chr5	65849850	65849950	O165	219	-	1110003E01Rik	NO	NO
chr8	129478750	129478850	O165	218	-	Rbm34	NO	NO
chr16	33837850	33837950	O165	214	-	Itgb5	NO	NO
chr16	69655350	69655450	O165	212	+	Speer2	NO	NO
chr1	169890750	169890850	O165	212	+	Lmx1a	NO	NO
chr12	100781550	100781650	O165	210	+	AC133083.3	NO	NO
chr1	56665450	56665550	O165	204	-	Hsfy2	NO	NO
chr12	70371950	70372050	O165	204	-	RP23-17K9.4	NO	NO
chr11	4409050	4409150	O165	203	-	Mtmr3	NO	NO
chr18	65543450	65543550	O165	198	+	Alpk2	NO	NO
chr14	58507950	58508050	O165	193	-	Zdhhc20	NO	NO
chr9	5878750	5878850	O165	193	-	Pdgfd	NO	NO
chr7	136071050	136071150	O165	192	+	AC136741.3	NO	NO
chr2	150631350	150631450	O165	192	-	Pygb	NO	NO
chr4	149722150	149722250	O165	189	-	Rere	NO	NO
chr17	42485150	42485250	O165	188	+	3110082D06Rik	NO	NO
chr6	142144450	142144550	O165	186	-	Slco1a6	NO	NO
chr10	84454050	84454150	O165	186	+	Ric8b	NO	NO
chr2	151745450	151745550	O165	184	+	Angpt4	NO	NO
chr3	137541150	137541250	O165	184	+	Dnajb14	NO	NO
chr2	115489650	115489750	O165	181	-	BC052040	NO	NO
chr11	29021550	29021650	O165	180	-	Pnpt1	NO	NO
chr4	108387450	108387550	O165	178	+	Zfyve9	NO	NO
chr19	26711350	26711450	O165	176	+	Smarca2	NO	NO
chrX	66326950	66327050	O165	172	+	RP23-99A5.4	NO	NO
chr12	113061150	113061250	O165	172	-	Zfyve21	NO	NO
chr4	72955150	72955250	O165	171	-	RP23-289L21.1	NO	NO
chr17	67596250	67596350	O165	169	+	Ptprm	NO	NO
chr12	15322750	15322850	O165	168	+	U6	NO	NO
chr17	69766150	69766250	O165	168	+	AC122487.1	NO	NO
chr3	52506450	52506550	O165	165	+	U6	NO	NO
chr17	67230950	67231050	O165	164	-	Ptprm	NO	NO
chr16	71284850	71284950	O165	163	+	U6	NO	NO
chr6	144416550	144416650	O165	163	-	Sox5	NO	NO
chr17	21163250	21163350	O165	163	+	Zfp160	NO	NO
chr9	42961750	42961850	O165	163	-	Pou2f3	NO	NO
chr4	131824550	131824650	O165	162	+	U11	NO	NO
chr7	114493250	114493350	O165	162	-	Syt9	NO	NO
chr7	97087950	97088050	O165	162	+	l7Rn6	NO	NO
chr10	128273250	128273350	O165	161	-	Sarnp	NO	NO
chr3	18610750	18610850	O165	160	+	AC162611.1	NO	NO
chr14	113704050	113704150	O165	159	+	AC115978.1	NO	NO
chr9	15324650	15324750	O165	158	-	BC017612	NO	NO
chr17	85411250	85411350	O165	156	-	Ppm1b	NO	NO
chr12	12356550	12356650	O165	156	-	Fam49a	NO	NO
chr15	12243950	12244050	O165	154	-	Golph3	NO	NO
chr3	101348450	101348550	O165	153	+	Atp1a1	NO	NO
chr10	61796450	61796550	O165	152	+	Hk1	NO	NO
chr17	38580550	38580650	O165	151	-	Olfr136	NO	NO
chr2	34986150	34986250	O165	151	+	Cep110	NO	NO
chr6	61272050	61272150	O165	148	+	Fam190a	NO	NO
chr2	168732850	168732950	O165	145	-	Zfp64	YES	NO
chrX	94848150	94848250	O165	141	+	RP23-147I24.1	NO	NO
chr17	27980950	27981050	O165	141	+	Snrpc	YES	NO
chr8	72273650	72273750	O165	139	+	Zfp866	NO	NO
chr8	73882650	73882750	O165	136	-	Myo9b	NO	NO
chr7	52839950	52840050	O165	136	+	Bcat2	NO	NO
chr5	122945550	122945650	O165	135	-	Atp2a2	YES	NO
chr2	104478950	104479050	O165	135	-	Cstf3	NO	NO
chr19	50975050	50975150	O165	135	+	5S_rRNA	NO	NO
chr16	18480650	18480750	O165	134	-	Txnrd2	NO	NO
chr12	57495750	57495850	O165	133	-	RP23-129H12.1	NO	NO
chr16	77005750	77005850	O165	132	+	Usp25	NO	NO
chr14	68259650	68259750	O165	130	-	Cdca2	NO	NO
chr2	35049450	35049550	O165	129	+	Rab14	NO	NO
chr6	124640950	124641050	O165	126	+	Lpcat3	NO	NO
chr4	73758050	73758150	O165	126	-	Frmd3	NO	NO
chr8	102153050	102153150	O165	125	+	A330008L17Rik	NO	NO
chr14	14562650	14562750	O165	125	-	Sntn	NO	NO
chr16	70741850	70741950	O165	124	-	Gbe1	NO	NO
chr8	130959350	130959450	O165	122	-	Nrp1	NO	NO
chr8	89376550	89376650	O165	122	-	N4bp1	NO	NO
chr13	71263750	71263850	O165	121	-	mmu-mir-466f-4	NO	NO
chr14	35079350	35079450	O165	120	-	Fam35a	NO	NO
chr7	121957750	121957850	O165	117	-	Insc	NO	NO
chr3	152045150	152045250	O165	117	-	Usp33	YES	NO
chr18	25340150	25340250	O165	117	-	AW554918	NO	NO
chr9	114531550	114531650	O165	116	+	Cnot10	NO	NO
chr16	62046050	62046150	O165	115	-	U6	NO	NO
chr14	65376550	65376650	O165	113	+	Kif13b	NO	NO
chr17	9503750	9503850	O165	112	-	AC158530.1	NO	NO
chr17	47135450	47135550	O165	112	+	Ubr2	NO	NO
chr19	57541250	57541350	O165	110	-	Trub1	NO	NO
chr2	116429050	116429150	O165	110	+	RP23-232J15.1	NO	NO
chr6	20354550	20354650	O165	110	-	SNORA72	NO	NO
chr1	101212350	101212450	O165	110	+	U6	NO	NO
chr10	113752550	113752650	O165	110	+	Trhde	NO	NO
chr16	4469950	4470050	O165	109	-	Srl	NO	NO
chr11	37579850	37579950	O165	109	-	RP23-403H17.1	NO	NO
chr9	63199650	63199750	O165	108	+	Map2k5	NO	NO
chr4	36059650	36059750	O165	107	-	Lingo2	NO	NO
chr2	30735750	30735850	O165	107	-	Prrx2	NO	NO
chr7	104759450	104759550	O165	104	-	AC151477.2	NO	NO
chr4	126538450	126538550	O165	103	+	AU040320	YES	NO
chr4	10811650	10811750	O165	103	+	2610301B20Rik	NO	NO
chr6	81099650	81099750	O165	102	-	U7	NO	NO
chr6	120321250	120321350	O165	102	+	Kdm5a	NO	NO
chr7	99792950	99793050	O165	101	+	Pcf11	NO	NO
chr4	101999850	101999950	O165	101	-	Pde4b	NO	NO
chr6	102319550	102319650	O165	99	+	Cntn3	NO	NO
chr4	122399850	122399950	O165	98	+	RP23-276E18.1	NO	NO
chr3	97753850	97753950	O165	97	-	AC164091.1	NO	NO
chrX	99110650	99110750	O165	96	-	Nhsl2	NO	NO
chr10	116628250	116628350	O165	95	-	SNORA13	NO	NO
chr17	89005650	89005750	O165	94	-	Ston1	NO	NO
chr10	76497850	76497950	O165	94	-	Slc19a1	NO	NO
chr2	75517750	75517850	O165	92	+	Nfe2l2	NO	NO
chr8	49043650	49043750	O165	92	+	Wwc2	NO	NO
chr8	11637350	11637450	O165	90	-	Ankrd10	NO	NO
chr17	5740450	5740550	O165	90	+	Zdhhc14	NO	NO
chr3	99970450	99970550	O165	89	+	Gdap2	NO	NO
chr4	18222450	18222550	O165	88	-	RP23-157O1.1	NO	NO
chr15	88552450	88552550	O165	88	+	Brd1	NO	NO
chr5	7664250	7664350	O165	86	+	AC133514.1	NO	NO
chr5	151515450	151515550	O165	84	+	Pds5b	NO	NO
chr15	12545650	12545750	O165	84	-	Pdzd2	NO	NO
chr1	89503550	89503650	O165	84	-	Neu2	NO	NO
chr17	70951850	70951950	O165	83	-	Dlgap1	NO	NO
chr7	106580850	106580950	O165	83	-	Gdpd5	YES	NO
chr11	9564850	9564950	O165	81	-	Abca13	NO	NO
chr7	104763250	104763350	O165	81	+	AC151477.2	NO	NO
chr15	103459350	103459450	O165	79	-	Glycam1	NO	NO
chr4	136054450	136054550	O165	78	+	Luzp1	NO	NO
chr10	61904250	61904350	O165	78	+	Supv3l1	NO	NO
chr16	57229450	57229550	O165	77	+	Tbc1d23	NO	NO
chr15	62068250	62068350	O165	76	-	Pvt1	NO	NO
chr14	29071250	29071350	O165	76	+	Erc2	NO	NO
chr15	12401150	12401250	O165	75	-	Pdzd2	NO	NO
chr5	78469250	78469350	O165	74	-	SNORA17	NO	NO
chr2	18267750	18267850	O165	73	-	Dnajc1	NO	NO
chr3	75725950	75726050	O165	73	+	Golim4	NO	NO
chr3	151897750	151897850	O165	72	+	Fubp1	NO	NO
chr8	33026250	33026350	O165	72	-	Nrg1	NO	NO
chr2	54752750	54752850	O165	72	+	Galnt13	NO	NO
chr16	41805050	41805150	O165	71	+	Lsamp	NO	NO
chr5	124937550	124937650	O167	23805	-	Snrnp35	YES	NO
chr2	109784250	109784350	O167	17226	+	Lgr4	YES	NO
chr11	53220350	53220450	O167	16649	+	Aff4	YES	NO
chrX	7503550	7503650	O167	13564	-	Eras	YES	NO
chr4	53151450	53151550	O167	13521	-	Abca1	YES	NO
chr12	78345750	78345850	O167	9836	-	Fut8	YES	NO
chr4	129042450	129042550	O167	5581	-	Zbtb8a	YES	NO
chr19	54223450	54223550	O167	4901	-	Adra2a	NO	NO
chr9	34863850	34863950	O167	3435	+	St3gal4	YES	NO
chr17	52222650	52222750	O167	3187	+	Gm16489	NO	NO
chr15	59385950	59386050	O167	3002	+	Nsmce2	YES	NO
chr1	10121750	10121850	O167	2492	-	Cspp1	YES	NO
chr2	162963050	162963150	O167	2351	-	RP23-335N12.3	YES	NO
chr2	124307650	124307750	O167	2348	+	Sema6d	YES	NO
chr10	62731450	62731550	O167	2219	+	Herc4	NO	NO
chr3	9275950	9276050	O167	2123	+	Zbtb10	NO	NO
chr14	63542850	63542950	O167	2056	-	Wdfy2	YES	NO
chr2	154373850	154373950	O167	2040	-	1700003F12Rik	YES	NO
chr16	30313550	30313650	O167	1964	-	Atp13a3	YES	NO
chr9	115060350	115060450	O167	1897	-	Osbpl10	NO	NO
chr3	66390850	66390950	O167	1819	+	Veph1	NO	NO
chr4	150417650	150417750	O167	1341	-	Per3	YES	NO
chr2	76462350	76462450	O167	1287	-	Prkra	NO	NO
chr3	132885150	132885250	O167	1153	+	D630013G24Rik	NO	NO
chrX	98437750	98437850	O167	1100	-	U11	NO	NO
chr2	59086950	59087050	O167	897	-	Pkp4	YES	NO
chr4	48067950	48068050	O167	772	-	Nr4a3	NO	NO
chr18	83124050	83124150	O167	654	+	Zfp516	YES	NO
chr2	69906250	69906350	O167	570	-	Myo3b	NO	NO
chr4	122660750	122660850	O167	329	+	Mycl1	YES	NO
chr18	6200850	6200950	O167	327	+	Kif5b	NO	NO
chr4	35120450	35120550	O167	315	+	Mobkl2b	YES	NO
chr9	63590850	63590950	O167	268	+	Smad3	YES	NO
chr4	125846350	125846450	O167	105	-	Thrap3	YES	NO
chr11	53591050	53591150	O167	103	-	Irf1	NO	NO
chr4	137315250	137315350	O167	89	-	Alpl	YES	NO
chr4	119243150	119243250	O167	84	-	Foxj3	YES	NO
chrX	91850350	91850450	O167	71	+	RP23-162P18.3	NO	NO
chr15	80678950	80679050	O167	65	+	Tnrc6b	YES	NO
chr11	25354450	25354550	O167	30	-	RP23-117H24.2	NO	NO
chrX	16695050	16695150	O235	21780	+	Efhc2	YES	YES
chr5	112779750	112779850	O235	16199	-	Hps4	YES	YES
chr11	4707250	4707350	O235	13275	+	Nf2	NO	YES
chr16	31731450	31731550	O235	12502	+	Dlg1	YES	YES
chr15	61815450	61815550	O235	11901	+	Myc	YES	YES
chr2	156586850	156586950	O235	9587	-	Dlgap4	YES	YES
chr4	69062450	69062550	O235	8476	-	RP24-387A5.1	NO	NO
chr16	32024950	32025050	O235	7852	+	Pak2	NO	YES
chr17	74947450	74947550	O235	7130	-	Birc6	YES	YES
chr11	70773750	70773850	O235	5635	-	Nup88	NO	YES
chr14	17208250	17208350	O235	5307	+	Top2b	NO	YES
chr5	124848650	124848750	O235	5007	+	Sbno1	NO	NO
chr10	70533950	70534050	O235	4993	-	Bicc1	YES	YES
chr1	129947350	129947450	O235	4970	+	Zranb3	NO	NO
chrX	60774850	60774950	O235	4963	-	RP23-269N5.1	NO	NO
chr15	11582650	11582750	O235	4329	-	Npr3	NO	NO
chr15	36889950	36890050	O235	4288	+	Zfp706	NO	YES
chr4	147213950	147214050	O235	4137	-	2810408P10Rik	NO	YES
chr4	123124350	123124450	O235	3926	+	Macf1	NO	NO
chr1	38318350	38318450	O235	3841	-	Aff3	NO	NO
chr15	95538350	95538450	O235	3510	-	Dbx2	NO	NO
chr4	144335650	144335750	O235	3505	-	U1	NO	NO
chr13	103819850	103819950	O235	3294	-	Mast4	NO	NO
chr6	53743750	53743850	O235	3107	-	1200009O22Rik	NO	NO
chr17	94033750	94033850	O235	2966	-	U6	NO	NO
chr16	31787350	31787450	O235	2516	-	Dlg1	YES	YES
chr4	107176150	107176250	O235	2458	-	Glis1	NO	NO
chr14	17082850	17082950	O235	2358	+	Ngly1	NO	NO
chr10	24594550	24594650	O235	2349	-	Med23	NO	NO
chr3	94655950	94656050	O235	2346	-	Pogz	YES	YES
chr5	24891250	24891350	O235	2264	-	Mll3	NO	YES
chr5	54494750	54494850	O235	2152	+	Stim2	NO	NO
chr17	42509150	42509250	O235	2127	+	Gm9753	NO	NO
chr14	60854450	60854550	O235	2059	-	Nupl1	NO	YES
chr17	44881250	44881350	O235	1984	+	Runx2	NO	YES
chr16	88932950	88933050	O235	1832	-	AC140194.5	NO	NO
chr8	119905450	119905550	O235	1679	-	4933407C03Rik	NO	YES
chr4	134405050	134405150	O235	1667	+	Tmem57	NO	NO
chr2	18607850	18607950	O235	1657	-	Bmi1	NO	YES
chr8	72985150	72985250	O235	1623	-	Klhl26	NO	NO
chr17	75663350	75663450	O235	1438	-	Ltbp1	NO	YES
chr13	34631150	34631250	O235	1434	+	1300014I06Rik	NO	NO
chr5	150008450	150008550	O235	1367	-	Uspl1	NO	NO
chr2	70656250	70656350	O235	1189	+	Tlk1	YES	YES
chr8	113472650	113472750	O235	1097	-	St3gal2	NO	NO
chr5	115862350	115862450	O235	1058	-	RP24-132L16.6	YES	NO
chr12	3489150	3489250	O235	1018	+	Asxl2	NO	NO
chr7	88082750	88082850	O235	931	+	Sec11a	NO	NO
chr15	85010850	85010950	O235	832	+	Fbln1	NO	NO
chr10	36231150	36231250	O235	809	-	Hs3st5	NO	NO
chr15	61923650	61923750	O235	796	-	Pvt1	YES	YES
chr1	59923450	59923550	O235	785	+	Bmpr2	NO	YES
chr6	136499750	136499850	O235	767	+	Atf7ip	NO	YES
chr12	72249050	72249150	O235	748	+	2700049A03Rik	YES	YES
chr1	78172250	78172350	O235	677	-	Pax3	NO	YES
chr3	135315950	135316050	O235	674	-	Nfkb1	NO	YES
chr11	106797350	106797450	O235	630	-	Smurf2	NO	NO
chr16	31796450	31796550	O235	502	-	Dlg1	YES	YES
chr2	160615050	160615150	O235	498	+	Zhx3	NO	YES
chr4	3943950	3944050	O235	478	-	Sdr16c5	NO	NO
chr14	69895350	69895450	O235	454	-	Slc25a37	NO	NO
chr6	65080350	65080450	O235	438	+	Hpgds	NO	NO
chr15	75086350	75086450	O235	436	+	Ly6f	NO	NO
chr3	14830050	14830150	O235	417	-	AC123747.1	NO	NO
chr2	104635750	104635850	O235	408	+	Qser1	NO	NO
chr17	64663050	64663150	O235	406	+	Pja2	NO	YES
chr16	34046750	34046850	O235	400	+	Kalrn	NO	NO
chr4	147276150	147276250	O235	397	-	Mfn2	NO	YES
chr17	94402550	94402650	O235	396	-	U6	NO	NO
chr13	112237750	112237850	O235	392	-	Gpbp1	NO	NO
chr18	16835350	16835450	O235	384	+	Cdh2	NO	NO
chr17	15082650	15082750	O235	383	+	Phf10	NO	NO
chr5	139618550	139618650	O235	376	+	Prkar1b	NO	NO
chr18	55833050	55833150	O235	369	+	AC147251.1	NO	NO
chr5	98353950	98354050	O235	359	+	Antxr2	NO	YES
chr5	6052350	6052450	O235	356	-	U1	NO	NO
chr9	34568950	34569050	O235	354	-	Kirrel3	NO	NO
chrX	62077350	62077450	O235	341	+	RP23-417D2.1	NO	NO
chr8	79106850	79106950	O235	338	+	AC113941.1	NO	NO
chr6	140376550	140376650	O235	329	+	Plekha5	NO	NO
chr1	62209150	62209250	O235	325	-	Pard3b	NO	NO
chr10	40201050	40201150	O235	321	+	Cdk19	NO	NO
chr8	27194550	27194650	O235	316	-	Hook3	NO	NO
chr12	101118950	101119050	O235	309	+	2610021K21Rik	YES	YES
chr17	70554850	70554950	O235	306	-	Dlgap1	NO	NO
chr6	97926650	97926750	O235	305	-	Mitf	NO	NO
chr17	28603950	28604050	O235	305	+	Fkbp5	NO	NO
chr6	33275550	33275650	O235	301	-	Exoc4	NO	NO
chr2	111412350	111412450	O235	300	-	Olfr1295	NO	NO
chr8	80268150	80268250	O235	300	-	AC113049.2	NO	NO
chr18	73044150	73044250	O235	299	+	AC139348.1	NO	YES
chr9	113787650	113787750	O235	297	+	Clasp2	NO	NO
chr9	55983850	55983950	O235	297	+	Tspan3	NO	NO
chr1	89321150	89321250	O235	287	-	Gigyf2	NO	YES
chr16	31698250	31698350	O235	285	-	Dlg1	YES	YES
chr3	86980750	86980850	O235	284	-	Kirrel	NO	NO
chr10	7626550	7626650	O235	274	+	Map3k7ip2	NO	NO
chr2	33519650	33519750	O235	269	-	RP23-65G6.5	NO	NO
chr5	137321150	137321250	O235	262	-	Emid2	NO	NO
chr13	38093050	38093150	O235	261	+	Cage1	NO	NO
chr14	61000350	61000450	O235	260	+	Fam123a	NO	NO
chr8	4590250	4590350	O235	259	-	BC003267	NO	NO
chr3	133315250	133315350	O235	258	-	SNORA17	NO	NO
chr15	27021450	27021550	O235	257	+	SNORA17	NO	NO
chr14	117632450	117632550	O235	255	-	Gpc6	NO	NO
chr18	60311350	60311450	O235	252	+	AC108942.1	NO	NO
chr4	44873450	44873550	O235	250	+	Zcchc7	NO	NO
chr3	16637950	16638050	O235	249	-	U6	NO	NO
chr6	51642550	51642650	O235	248	-	Snx10	NO	NO
chr16	25591950	25592050	O235	247	-	Trp63	NO	NO
chr2	122766450	122766550	O235	246	-	Sqrdl	NO	NO
chr15	57927350	57927450	O235	246	+	Atad2	NO	NO
chr3	122252750	122252850	O235	245	-	Fnbp1l	NO	NO
chr19	30404950	30405050	O235	244	+	7SK	NO	NO
chr15	63943150	63943250	O235	243	+	Asap1	NO	NO
chr18	55427350	55427450	O235	240	+	U6	NO	NO
chr12	67133450	67133550	O235	240	+	AC125344.1	NO	NO
chr2	26963950	26964050	O235	240	+	Adamtsl2	NO	NO
chr2	117456750	117456850	O235	238	-	RP23-291N19.1	NO	NO
chr14	62004450	62004550	O235	238	-	Kpna3	NO	NO
chr16	36075150	36075250	O235	235	+	Ccdc58	NO	NO
chr14	20916150	20916250	O235	231	-	1810063B07Rik	NO	NO
chr6	85112050	85112150	O235	228	-	AC153373.1	NO	NO
chr7	84062750	84062850	O235	225	-	Agbl1	NO	NO
chr15	20874850	20874950	O235	225	-	SNORA17	NO	NO
chr2	138550650	138550750	O235	225	+	RP23-162C3.1	NO	NO
chr1	32371150	32371250	O235	224	-	Khdrbs2	NO	NO
chr7	60975250	60975350	O235	223	+	AC127338.1	NO	NO
chr1	130125850	130125950	O235	221	-	R3hdm1	NO	YES
chr18	35355750	35355850	O235	214	-	Ctnna1	NO	NO
chrX	67463850	67463950	O235	212	+	Ids	NO	NO
chr2	79335250	79335350	O235	211	+	AL928696.1	NO	NO
chr3	103219550	103219650	O235	209	+	U6	NO	YES
chr15	14945150	14945250	O235	208	+	AC165279.1	NO	NO
chr1	178634550	178634650	O235	208	+	U6	NO	NO
chr11	66698050	66698150	O235	208	-	RP23-67J22.2	NO	NO
chr1	184047450	184047550	O235	205	-	Srp9	NO	NO
chr7	99137450	99137550	O235	203	+	Dlg2	NO	NO
chr1	162958750	162958850	O235	200	-	Zbtb37	NO	NO
chr6	135968450	135968550	O235	199	-	Grin2b	NO	NO
chr14	114594050	114594150	O235	199	+	RP23-255H22.1	NO	NO
chr5	135915450	135915550	O235	197	-	Hip1	NO	NO
chr4	12912550	12912650	O235	196	+	RP23-22G24.1	NO	NO
chr5	24907350	24907450	O235	193	+	Mll3	NO	YES
chr4	118910150	118910250	O235	192	+	Lepre1	NO	NO
chr6	20817650	20817750	O235	192	-	SNORA72	NO	NO
chr1	59550350	59550450	O235	190	+	Fzd7	NO	NO
chr1	164138150	164138250	O235	185	+	Dnm3	NO	NO
chr18	86634550	86634650	O235	183	-	Neto1	NO	NO
chr17	17954550	17954650	O235	181	-	mmu-mir-99b	NO	NO
chr1	162878850	162878950	O235	180	-	Rc3h1	NO	NO
chr11	28037450	28037550	O235	178	-	RP23-300M3.1	NO	NO
chr2	63025050	63025150	O235	177	+	Kcnh7	NO	NO
chr12	8901650	8901750	O235	174	-	RP23-344H23.1	YES	YES
chr12	17427450	17427550	O235	174	+	Nol10	NO	NO
chr2	153124350	153124450	O235	173	-	Kif3b	NO	NO
chr12	86285450	86285550	O235	171	-	1110018G07Rik	NO	NO
chr5	61829450	61829550	O235	170	-	AC114918.1	NO	NO
chr3	69163350	69163450	O235	169	+	Ppm1l	NO	NO
chr5	151545650	151545750	O235	167	-	Pds5b	NO	NO
chr7	51577250	51577350	O235	166	-	Shank1	NO	NO
chr2	67615450	67615550	O235	165	+	RP23-326I20.1	NO	NO
chr1	41067950	41068050	O235	164	-	AC101702.1	NO	NO
chr1	169158250	169158350	O235	161	-	Uck2	YES	NO
chr5	9116750	9116850	O235	161	-	4930420K17Rik	NO	NO
chr17	68107450	68107550	O235	160	-	Lama1	NO	YES
chr13	38853250	38853350	O235	159	-	Eef1e1	NO	NO
chr12	101120650	101120750	O235	158	-	2610021K21Rik	YES	YES
chr3	109506650	109506750	O235	157	+	Vav3	NO	NO
chr11	73940750	73940850	O235	157	-	Olfr401	NO	NO
chr17	39207650	39207750	O235	156	+	AC168268.1	NO	NO
chr11	30703350	30703450	O235	155	-	Psme4	NO	YES
chr17	31845150	31845250	O235	154	+	Cryaa	NO	YES
chr11	70506150	70506250	O235	153	-	Inca1	NO	NO
chr9	77196650	77196750	O235	153	-	2310046A06Rik	NO	NO
chr1	27131950	27132050	O235	151	-	AC102363.1	NO	NO
chr4	106373850	106373950	O235	151	+	RP23-97O7.6	NO	NO
chr3	42545550	42545650	O235	150	+	D3Ertd751e	NO	NO
chr1	167713150	167713250	O235	149	-	RP23-132G24.1	NO	NO
chr15	5864250	5864350	O235	147	+	SNORA17	NO	NO
chr1	156074850	156074950	O235	147	+	AC118263.2	NO	NO
chr3	74320350	74320450	O235	146	-	Zbbx	NO	NO
chr1	84484450	84484550	O235	145	-	Dner	NO	NO
chr1	33991650	33991750	O235	145	+	Dst	NO	NO
chr3	31849550	31849650	O235	145	-	Kcnmb2	NO	YES
chr12	82941350	82941450	O235	145	-	Pcnx	NO	NO
chr14	58308250	58308350	O235	145	-	Lats2	NO	YES
chr3	72801450	72801550	O235	144	-	Sis	NO	NO
chr9	114757150	114757250	O235	144	+	Cmtm8	NO	YES
chr2	149818750	149818850	O235	144	+	Tmem90b	NO	NO
chr17	31938550	31938650	O235	143	+	Sik1	NO	NO
chr5	56324950	56325050	O235	140	+	AC107721.1	NO	NO
chr14	114631750	114631850	O235	140	-	RP23-255H22.1	NO	NO
chr1	47738550	47738650	O235	138	+	AC134426.2	NO	NO
chr1	132025650	132025750	O235	138	-	Thsd7b	NO	NO
chr19	38748750	38748850	O235	137	+	Plce1	NO	NO
chr17	72742950	72743050	O235	136	-	Alk	NO	NO
chr5	24370450	24370550	O235	134	-	Prkag2	NO	NO
chr2	98774050	98774150	O235	134	+	BADrepeat	NO	NO
chr12	111719850	111719950	O235	133	+	Ppp2r5c	NO	NO
chr10	81976350	81976450	O235	128	+	Gm1553	NO	NO
chr5	54461350	54461450	O235	127	-	Stim2	NO	NO
chr15	76091050	76091150	O235	126	+	Gm10872	NO	NO
chr11	115798450	115798550	O235	126	-	Sap30bp	NO	NO
chr7	140058350	140058450	O235	126	+	Fgfr2	NO	NO
chr18	14358550	14358650	O235	126	-	AC158772.1	NO	NO
chr17	82904350	82904450	O235	125	+	AC166163.1	NO	NO
chr19	3495950	3496050	O235	125	-	Saps3	NO	NO
chr13	97324950	97325050	O235	123	-	Col4a3bp	NO	NO
chr18	68170250	68170350	O235	123	+	D18Ertd653e	NO	NO
chr12	79190250	79190350	O235	121	-	SNORA17	NO	NO
chr5	66400950	66401050	O235	121	+	9130230L23Rik	NO	NO
chr11	3723750	3723850	O235	120	+	Osbp2	NO	NO
chr14	79742750	79742850	O235	119	+	Naa16	NO	NO
chr12	80072650	80072750	O235	118	+	Tmem229b	NO	NO
chr16	36811050	36811150	O235	118	-	Eaf2	NO	NO
chr15	41324950	41325050	O235	116	-	Oxr1	NO	NO
chr8	124251150	124251250	O235	115	+	Galnt2	NO	NO
chr14	119469650	119469750	O235	113	+	Uggt2	NO	NO
chr9	66166550	66166650	O235	113	+	Herc1	NO	NO
chr2	40594650	40594750	O235	112	+	Lrp1b	NO	NO
chr17	65570750	65570850	O235	112	+	Tmem232	NO	NO
chrX	73024750	73024850	O235	111	-	Pls3	NO	NO
chr1	15271350	15271450	O235	108	-	AC166075.1	NO	NO
chr4	123096150	123096250	O235	108	-	Macf1	NO	NO
chr6	76201250	76201350	O235	107	-	U1	NO	NO
chr18	4920150	4920250	O235	107	+	Svil	NO	NO
chr18	21239450	21239550	O235	107	+	Mep1b	NO	NO
chr5	120899850	120899950	O235	106	-	Sdsl	NO	NO
chr16	42526150	42526250	O235	105	-	Gap43	NO	NO
chr3	113308850	113308950	O235	105	-	Rnpc3	NO	NO
chr10	110453150	110453250	O235	104	+	Zdhhc17	NO	NO
chr12	109886050	109886150	O235	102	-	Evl	NO	NO
chr13	57566850	57566950	O235	102	+	Spock1	NO	NO
chr5	86243650	86243750	O235	101	+	U1	NO	NO
chr18	7420250	7420350	O235	101	+	Mpp7	NO	NO
chr5	72327750	72327850	O235	100	-	Gabrb1	NO	NO
chr7	149230150	149230250	O235	100	+	2700078K21Rik	NO	NO
chr2	163468350	163468450	O235	100	-	AL591488.2	NO	NO
chr4	55102850	55102950	O235	99	+	Zfp462	NO	NO
chr17	63166750	63166850	O235	98	+	Efna5	YES	NO
chr2	165718750	165718850	O235	97	-	Zmynd8	NO	YES
chr2	45971350	45971450	O235	96	-	SNORA17	NO	NO
chr15	36586250	36586350	O235	96	+	AC137871.1	NO	NO
chr9	118847150	118847250	O235	95	+	Ctdspl	NO	NO
chr16	20281150	20281250	O235	94	-	Parl	NO	NO
chr15	93324750	93324850	O235	94	+	Prickle1	NO	NO
chr9	79685050	79685150	O235	89	+	Filip1	NO	NO
chr12	45577950	45578050	O235	89	-	Nrcam	NO	NO
chr10	107829050	107829150	O235	88	-	Pawr	NO	NO
chr6	74331650	74331750	O235	86	+	SNORA17	NO	NO
chr12	101150850	101150950	O235	86	+	Tdp1	YES	YES
chr5	147047250	147047350	O235	86	-	Cdk8	NO	NO
chr17	85945450	85945550	O235	86	+	Six3os1	NO	NO
chr11	30094750	30094850	O235	86	-	Spnb2	NO	YES
chr9	121653050	121653150	O235	85	+	Nktr	NO	NO
chr16	76320950	76321050	O235	85	+	Nrip1	NO	NO
chr17	60876050	60876150	O235	83	-	U1	NO	NO
chr6	33878150	33878250	O235	82	+	Exoc4	NO	NO
chr2	130829850	130829950	O235	82	-	Atrn	NO	NO
chr2	65732850	65732950	O235	82	-	Csrnp3	NO	NO
chr13	18289450	18289550	O235	81	+	Pou6f2	NO	NO
chr17	91285750	91285850	O235	80	-	Nrxn1	NO	NO
chr19	10700150	10700250	O235	80	-	Ddb1	NO	NO
chr5	121762850	121762950	O235	78	+	Gm15800	NO	YES
chr1	133498450	133498550	O235	78	-	Avpr1b	NO	NO
chr7	68351750	68351850	O235	77	-	A230006K03Rik	NO	NO
chr17	43853950	43854050	O235	76	-	Cyp39a1	NO	NO
chr17	63328350	63328450	O235	74	-	Fbxl17	NO	NO
chr6	73149350	73149450	O235	74	+	Dnahc6	NO	NO
chr3	135052950	135053050	O235	72	-	Nhedc1	NO	NO
chr8	87819850	87819950	O235	72	-	Vps35	NO	NO
chrX	38175050	38175150	O235	71	-	X.36189677-37393805.	NO	NO
chr5	132954250	132954350	O235	71	+	Auts2	NO	NO
chr14	112205950	112206050	O235	70	-	Slitrk5	NO	NO
chr8	12493550	12493650	O235	70	-	Gm5607	NO	NO
chr3	139633950	139634050	O235	70	+	B930007M17Rik	NO	NO
chr1	190415550	190415650	O235	70	-	Ush2a	NO	NO
chr4	154584050	154584150	O235	69	+	Ski	NO	NO
chr1	85252350	85252450	O235	67	-	Csprs	NO	NO
chr5	86557050	86557150	O235	67	-	Uba6	NO	NO
chr10	73853450	73853550	O235	67	-	Pcdh15	NO	NO
chr2	136410050	136410150	O235	67	+	Ankrd5	NO	NO
chr12	106932650	106932750	O235	66	+	4933433P14Rik	NO	NO
chr11	70840050	70840150	O235	63	-	Mis12	NO	YES
chr18	4872250	4872350	O235	63	-	Gm10556	NO	NO
chr5	106195250	106195350	O235	62	-	Lrrc8d	NO	NO
chr1	168870650	168870750	O235	62	+	AC119212.1	YES	YES
chr15	41430950	41431050	O235	62	+	Oxr1	NO	NO
chr9	90160250	90160350	O235	60	+	Tbc1d2b	NO	NO
chr5	133246250	133246350	O235	60	-	7SK	NO	NO
chr9	51778250	51778350	O235	59	-	Fdx1	NO	NO
chr12	100643650	100643750	O235	59	-	Foxn3	NO	NO
chr12	67774050	67774150	O235	59	-	Mdga2	NO	NO
chr1	75815950	75816050	O235	58	-	AC133581.2	NO	NO
chr5	125322050	125322150	O235	58	+	Ccdc92	NO	NO
chr9	99287750	99287850	O235	57	+	Mras	NO	NO
chr16	27054150	27054250	O235	56	+	Gm606	NO	NO
chr1	93288150	93288250	O235	55	-	Ilkap	NO	NO
chr5	121779950	121780050	O235	55	+	Gm15800	NO	YES
chr17	70592850	70592950	O235	54	-	Dlgap1	NO	NO
chr8	112102250	112102350	O235	54	-	Hp	NO	NO
chr2	149216150	149216250	O235	53	-	Cst10	NO	NO
chr6	97124650	97124750	O235	53	+	Tmf1	NO	NO
chr12	66815950	66816050	O235	53	-	SNORA17	NO	NO
chr4	114643150	114643250	O235	53	-	Cmpk1	NO	NO
chr12	28071350	28071450	O235	52	+	Sox11	NO	NO
chr1	169183950	169184050	O235	52	+	Uck2	YES	NO
chr8	8983950	8984050	O235	51	-	Fam155a	NO	NO
chr5	98585350	98585450	O235	51	+	Prdm8	NO	NO
chr15	60099550	60099650	O235	50	+	U6	NO	NO
chr1	46185850	46185950	O235	49	+	AC108850.1	NO	NO
chr10	46453150	46453250	O235	48	+	SNORA17	NO	NO
chr7	89845150	89845250	O235	48	-	Eftud1	NO	NO
chr15	71829050	71829150	O235	48	-	Col22a1	NO	NO
chr5	123036550	123036650	O235	48	+	Ift81	NO	NO
chr4	63624750	63624850	O235	47	+	Tnc	NO	NO
chr4	7510250	7510350	O235	47	+	RP23-65N19.1	NO	NO
chr9	117114950	117115050	O235	46	+	Rbms3	NO	NO
chr16	4447050	4447150	O235	46	+	Adcy9	NO	NO
chr17	32380250	32380350	O235	46	-	Brd4	NO	NO
chr16	34876950	34877050	O235	45	+	Mylk	NO	NO
chr12	116834250	116834350	O235	45	+	AC073939.5	NO	NO
chr17	87264450	87264550	O235	45	-	Epas1	NO	NO
chr18	46254350	46254450	O235	44	-	Trim36	NO	NO
chr9	118725750	118725850	O235	43	-	Itga9	NO	NO
chr3	124273750	124273850	O235	41	-	1700003H04Rik	NO	NO
chr1	168910050	168910150	O235	40	-	AC119212.1	YES	YES
chr4	84638050	84638150	O235	40	+	Cntln	NO	NO
chr7	107127950	107128050	O235	39	+	Rnf169	NO	NO
chr16	77706550	77706650	O235	39	+	mmu-mir-125b-2	NO	YES
chr2	50487650	50487750	O235	39	-	RP23-244J24.4	NO	NO
chr1	40976150	40976250	O235	39	-	AC101702.1	NO	NO
chr16	13335750	13335850	O235	38	+	Mkl2	NO	NO
chr3	54264750	54264850	O235	38	+	AC121785.1	NO	NO
chr15	17002050	17002150	O235	37	+	Cdh9	NO	NO
chr17	79428950	79429050	O235	36	+	Prkd3	NO	YES
chr14	31317450	31317550	O235	36	-	Dcp1a	NO	NO
chr9	65690150	65690250	O235	36	-	Trip4	NO	NO
chr6	39903150	39903250	O235	36	-	Mrps33	NO	NO
chr5	75597750	75597850	O235	36	+	Pdgfra	NO	NO
chr1	163167550	163167650	O235	36	-	Prdx6	NO	NO
chr6	68168950	68169050	O235	36	-	Gm5153	NO	NO
chr12	9599550	9599650	O235	35	+	Osr1	NO	NO
chr10	39802450	39802550	O235	34	+	Slc16a10	NO	NO
chr6	135512750	135512850	O235	34	-	SNORA36	NO	YES
chr14	21569250	21569350	O245	18929	+	Camk2g	YES	YES
chr4	138820650	138820750	O245	15550	+	Capzb	YES	YES
chrX	139419850	139419950	O245	14477	+	Ammecr1	YES	YES
chr13	108569550	108569650	O245	13316	+	Zswim6	YES	YES
chr11	117593950	117594050	O245	10668	+	Tnrc6c	YES	YES
chr1	56911450	56911550	O245	10251	-	Satb2	YES	YES
chr7	104480150	104480250	O245	9207	+	Usp35	NO	YES
chr11	103116450	103116550	O245	8990	+	Map3k14	YES	YES
chr4	82052250	82052350	O245	8058	-	Nfib	YES	YES
chr4	89824350	89824450	O245	7968	-	RP23-258D11.1	NO	NO
chrX	139217950	139218050	O245	7244	+	Tmem164	NO	NO
chr3	27424550	27424650	O245	7189	-	Fndc3b	YES	YES
chr13	102533850	102533950	O245	6863	+	Pik3r1	YES	YES
chr9	14372150	14372250	O245	6843	-	Amotl1	YES	YES
chr14	112664550	112664650	O245	6819	-	CT009734.1	NO	NO
chr7	117497850	117497950	O245	6380	+	Sbf2	NO	NO
chr11	75597850	75597950	O245	6130	-	Doc2b	YES	YES
chr2	98506350	98506450	O245	5900	+	BADrepeat	NO	NO
chr17	47774250	47774350	O245	5608	+	Usp49	YES	YES
chr16	54034050	54034150	O245	5402	+	AC125028.1	NO	NO
chr8	41588950	41589050	O245	5117	-	Zdhhc2	YES	YES
chr1	135310450	135310550	O245	4761	-	Sox13	YES	YES
chr15	32333950	32334050	O245	4694	+	Sema5a	YES	YES
chr4	100853850	100853950	O245	4633	+	Jak1	NO	YES
chr8	98004350	98004450	O245	4621	+	Csnk2a2	YES	YES
chr8	112785350	112785450	O245	4514	+	Hydin	NO	NO
chr17	42957150	42957250	O245	4397	-	Cd2ap	YES	YES
chr18	6062350	6062450	O245	4308	+	Arhgap12	YES	YES
chr15	5106950	5107050	O245	4099	-	Prkaa1	NO	NO
chr8	126812150	126812250	O245	4089	-	Galnt2	YES	YES
chr11	98122550	98122650	O245	4050	-	Crkrs	YES	YES
chr16	89402050	89402150	O245	3661	+	Krtap16-7	NO	NO
chr10	70595950	70596050	O245	3582	-	Bicc1	YES	YES
chr9	44125450	44125550	O245	3562	+	C2cd2l	YES	YES
chr15	80859450	80859550	O245	3353	+	Mkl1	YES	YES
chr14	58237750	58237850	O245	3311	+	Xpo4	YES	YES
chr10	7647250	7647350	O245	3078	+	Map3k7ip2	NO	YES
chr5	65996750	65996850	O245	2897	+	Ube2k	YES	YES
chr4	130285850	130285950	O245	2806	-	Pum1	YES	YES
chr17	73585450	73585550	O245	2732	+	Lclat1	NO	NO
chr17	29180750	29180850	O245	2673	+	Sfrs3	YES	YES
chr7	17089150	17089250	O245	2606	+	Grlf1	YES	YES
chr11	23292850	23292950	O245	2498	-	Usp34	YES	YES
chr3	30691650	30691750	O245	2292	+	Sec62	NO	NO
chr18	62705850	62705950	O245	1984	+	Fbxo38	NO	YES
chr1	80335650	80335750	O245	1885	+	Cul3	YES	YES
chr14	58316450	58316550	O245	1679	+	Lats2	YES	YES
chr4	86415550	86415650	O245	1601	+	Dennd4c	NO	NO
chr2	160494750	160494850	O245	1581	-	Top1	NO	NO
chr5	88997350	88997450	O245	1566	+	Rufy3	NO	YES
chr6	100189650	100189750	O245	1421	-	Rybp	NO	NO
chr5	110878050	110878150	O245	1403	-	AC169384.1	YES	YES
chr5	134765150	134765250	O245	1398	+	Gtf2i	YES	YES
chr2	78740650	78740750	O245	1326	-	Ube2e3	NO	NO
chr2	119237050	119237150	O245	1298	-	Ino80	YES	YES
chr7	17155550	17155650	O245	1285	+	Grlf1	YES	YES
chr17	88410250	88410350	O245	1223	-	Fbxo11	YES	YES
chr4	69341350	69341450	O245	1215	-	RP24-313C24.1	NO	NO
chr12	105847950	105848050	O245	1195	-	Dicer1	YES	YES
chr8	129812250	129812350	O245	1151	-	Pard3	YES	YES
chr18	32033650	32033750	O245	1144	-	Wdr33	NO	NO
chr11	76288450	76288550	O245	1130	+	Abr	NO	NO
chr4	35173550	35173650	O245	1058	-	RP23-307M2.3	NO	NO
chr1	89825050	89825150	O245	1056	+	Dgkd	YES	YES
chr4	88924050	88924150	O245	1051	+	Cdkn2a	NO	YES
chr6	13588150	13588250	O245	955	+	AC139884.2	NO	YES
chr18	80557650	80557750	O245	912	-	AC145610.2	YES	YES
chr10	74020050	74020150	O245	912	-	Pcdh15	NO	NO
chr7	119825250	119825350	O245	841	+	Tead1	NO	NO
chr6	13604350	13604450	O245	838	+	AC139884.2	NO	YES
chr1	89319050	89319150	O245	808	-	Gigyf2	NO	YES
chr7	125628950	125629050	O245	802	-	Itpripl2	NO	NO
chr18	48167050	48167150	O245	793	+	AC150274.1	NO	NO
chr9	59324950	59325050	O245	778	-	Arih1	NO	NO
chr3	75327150	75327250	O245	777	+	Pdcd10	NO	NO
chr6	71577450	71577550	O245	754	-	Kdm3a	NO	NO
chr2	124437750	124437850	O245	737	+	Sema6d	NO	NO
chr7	78195450	78195550	O245	729	-	AC131983.1	NO	NO
chr16	96249350	96249450	O245	710	-	Brwd1	YES	YES
chr14	26350750	26350850	O245	700	+	Zmiz1	NO	NO
chr13	14696150	14696250	O245	681	+	Mrpl32	NO	NO
chr1	99971250	99971350	O245	666	-	Pam	NO	NO
chr8	79421150	79421250	O245	666	+	AC113941.1	NO	NO
chr12	13604350	13604450	O245	651	+	Nbas	NO	NO
chr9	21435850	21435950	O245	625	-	Smarca4	NO	YES
chr7	121596550	121596650	O245	605	-	Pde3b	NO	NO
chr6	43895050	43895150	O245	603	+	SNORA17	NO	NO
chr12	35189250	35189350	O245	573	+	Hdac9	NO	NO
chr8	47745350	47745450	O245	558	-	Casp3	NO	NO
chrX	61461450	61461550	O245	550	-	3830417A13Rik	NO	NO
chr4	100467750	100467850	O245	540	+	Cachd1	NO	NO
chrX	22915550	22915650	O245	540	+	Klhl13	NO	NO
chr8	129810350	129810450	O245	540	+	Pard3	YES	YES
chr5	110847450	110847550	O245	522	+	Fbrsl1	YES	YES
chr8	131082750	131082850	O245	515	-	Nrp1	NO	NO
chr13	32359550	32359650	O245	515	-	Gmds	YES	YES
chr1	83168250	83168350	O245	491	-	Wdr69	NO	NO
chr13	88165350	88165450	O245	486	+	AC154424.1	NO	NO
chr1	92644150	92644250	O245	474	-	Col6a3	NO	NO
chr16	44497650	44497750	O245	471	+	Boc	NO	NO
chr9	37481450	37481550	O245	471	-	Panx3	NO	YES
chr11	23344250	23344350	O245	470	-	Usp34	YES	YES
chr1	167232750	167232850	O245	419	-	Gpr161	NO	NO
chr12	50422050	50422150	O245	412	+	Foxg1	NO	NO
chr2	75689450	75689550	O245	402	-	Agps	NO	NO
chr13	68887750	68887850	O245	400	-	Adcy2	NO	NO
chr8	117379550	117379650	O245	383	-	Wwox	NO	NO
chr3	105756050	105756150	O245	377	+	Atp5f1	YES	YES
chr12	56007650	56007750	O245	373	+	Baz1a	NO	NO
chr19	43744250	43744350	O245	367	-	Slc25a28	NO	NO
chr7	130285950	130286050	O245	362	-	Tnrc6a	NO	NO
chrX	48814350	48814450	O245	337	+	Hs6st2	NO	NO
chr15	32902150	32902250	O245	332	-	Sdc2	NO	NO
chr6	39368750	39368850	O245	322	-	Mkrn1	NO	NO
chr17	31197150	31197250	O245	320	-	Abcg1	NO	NO
chr3	3132150	3132250	O245	310	-	Hnf4g	NO	NO
chr4	134351350	134351450	O245	290	+	Tmem57	YES	YES
chr7	17105950	17106050	O245	288	+	Grlf1	YES	YES
chr12	47131250	47131350	O245	283	+	SNORA73	NO	NO
chr9	75311350	75311450	O245	275	-	Leo1	NO	NO
chr4	82116550	82116650	O245	274	+	Nfib	YES	YES
chr1	173263750	173263850	O245	270	+	Dedd	NO	NO
chr12	62724650	62724750	O245	269	+	Lrfn5	NO	NO
chr2	91382450	91382550	O245	269	+	Ckap5	YES	NO
chr9	90001650	90001750	O245	263	+	Morf4l1	NO	NO
chr1	89349650	89349750	O245	259	-	Gigyf2	NO	YES
chr1	10178050	10178150	O245	255	+	Arfgef1	NO	NO
chr4	62294050	62294150	O245	254	+	Rgs3	NO	YES
chr4	102273650	102273750	O245	244	+	Pde4b	NO	NO
chr7	76272950	76273050	O245	236	-	SNORA21	NO	NO
chr17	17735350	17735450	O245	226	+	Lnpep	NO	NO
chr4	41092150	41092250	O245	221	+	Ube2r2	YES	YES
chr17	56827650	56827750	O245	221	-	Ranbp3	NO	NO
chr16	91324450	91324550	O245	220	+	RP23-190G10.2	NO	NO
chr17	66553750	66553850	O245	217	-	Ddx11	NO	NO
chr1	92963750	92963850	O245	215	+	Lrrfip1	YES	YES
chr15	8379250	8379350	O245	210	+	Nipbl	NO	NO
chr3	103105850	103105950	O245	205	+	Trim33	NO	NO
chr12	4966750	4966850	O245	197	-	Atad2b	YES	NO
chr10	7647250	7647350	O245	195	-	Map3k7ip2	NO	YES
chr19	37589050	37589150	O245	195	-	Exoc6	NO	NO
chr11	44636150	44636250	O245	191	+	Ebf1	NO	NO
chr16	10297850	10297950	O245	187	+	Emp2	YES	YES
chr17	51017550	51017650	O245	187	-	Tbc1d5	NO	NO
chr4	140336550	140336650	O245	183	+	Padi3	NO	NO
chr4	90980050	90980150	O245	179	-	Elavl2	NO	NO
chrX	17832950	17833050	O245	166	-	Kdm6a	YES	YES
chrX	80650850	80650950	O245	162	-	Dmd	NO	NO
chr9	32332250	32332350	O245	162	+	Fli1	NO	YES
chr7	17130150	17130250	O245	156	+	Grlf1	YES	YES
chr1	80316550	80316650	O245	154	+	Cul3	YES	YES
chr4	78964450	78964550	O245	151	-	RP23-57L17.1	NO	NO
chr4	104097150	104097250	O245	150	-	Dab1	NO	NO
chr10	7435650	7435750	O245	145	+	Lats1	NO	NO
chr15	8877950	8878050	O245	144	-	Ranbp3l	NO	NO
chr15	15212350	15212450	O245	138	+	AC165279.1	NO	NO
chr3	44520050	44520150	O245	133	-	U6	NO	NO
chr1	137422250	137422350	O245	133	-	Nav1	NO	NO
chr5	40882150	40882250	O245	126	-	U2	NO	NO
chrX	125314950	125315050	O245	122	+	U6	NO	NO
chrX	59911250	59911350	O245	118	+	RP23-245N10.1	NO	NO
chr17	39669750	39669850	O245	115	+	AC168268.1	NO	NO
chr9	92030450	92030550	O245	115	+	Plscr1	NO	NO
chr16	25112050	25112150	O245	115	-	AC133967.1	NO	NO
chr2	171043050	171043150	O245	111	+	RP23-117M21.1	NO	NO
chr14	89922850	89922950	O245	99	+	U6	NO	NO
chr2	177682850	177682950	O245	90	+	Gm14325	NO	YES
chr10	7402750	7402850	O245	90	-	Pcmt1	NO	NO
chr8	97523750	97523850	O245	90	-	Gpr56	NO	NO
chr3	88656850	88656950	O245	88	+	Gon4l	NO	NO
chr7	60990850	60990950	O245	88	-	AC127338.1	NO	NO
chr10	120218850	120218950	O245	83	+	Msrb3	NO	NO
chr18	35321050	35321150	O245	77	-	Ctnna1	NO	NO
chr8	111394150	111394250	O245	75	+	Zfhx3	NO	NO
chr8	41119050	41119150	O245	74	+	Gm10682	NO	NO
chr16	26376150	26376250	O245	71	+	Cldn1	NO	NO
chr3	142539750	142539850	O245	70	-	Pkn2	NO	YES
chr8	38465550	38465650	O245	69	-	U6	NO	NO
chr4	137006350	137006450	O245	67	+	1700013G24Rik	NO	NO
chr2	130431350	130431450	O245	64	-	Ubox5	NO	YES
chr8	79771250	79771350	O245	64	+	Nr3c2	NO	NO
chr17	47833050	47833150	O245	64	+	Frs3	YES	YES
chr17	94479750	94479850	O245	61	-	U6	NO	NO
chr17	18335250	18335350	O245	60	+	AC122257.1	NO	NO
chr10	119029250	119029350	O245	59	-	Grip1	NO	NO
chr5	113466250	113466350	O245	59	-	U6	NO	NO
chr10	31634550	31634650	O245	55	-	AC126430.1	NO	NO
chr2	17994250	17994350	O245	52	+	Mllt10	YES	YES
chr2	131175150	131175250	O245	49	+	Rnf24	NO	NO
chr4	149774650	149774750	O245	49	-	Rere	YES	YES
chr14	22651650	22651750	O245	48	-	Vdac2	NO	YES
chr3	70156550	70156650	O245	48	-	SNORA17	NO	NO
chr4	76012450	76012550	O31	25453	-	Ptprd	YES	NO
chr14	23462250	23462350	O31	21397	+	1700112E06Rik	YES	NO
chr12	66072450	66072550	O31	20530	+	Fam179b	NO	NO
chr4	123318950	123319050	O31	15362	+	Macf1	NO	NO
chr15	95671450	95671550	O31	14920	+	Ano6	YES	NO
chrX	71482550	71482650	O31	13062	-	Flna	YES	NO
chr10	98424250	98424350	O31	12430	+	Atp2b1	YES	NO
chr16	13382550	13382650	O31	11658	+	Mkl2	YES	NO
chr11	32846950	32847050	O31	11286	-	RP23-94F11.5	YES	NO
chr8	90552550	90552650	O31	9409	-	AC127285.1	NO	NO
chr18	4949450	4949550	O31	9300	+	Svil	YES	NO
chr2	25812450	25812550	O31	8989	+	Camsap1	YES	NO
chr11	50434150	50434250	O31	8920	-	Adamts2	YES	NO
chr4	154982550	154982650	O31	8388	-	Slc35e2	YES	NO
chr14	92925750	92925850	O31	8257	+	SNORA17	NO	NO
chr15	81227850	81227950	O31	7742	+	St13	NO	NO
chr9	70152550	70152650	O31	6707	-	Myo1e	YES	NO
chr5	143830250	143830350	O31	6403	+	Rnf216	YES	NO
chr19	17416850	17416950	O31	5570	+	Gcnt1	YES	NO
chr5	20382150	20382250	O31	4833	+	Phtf2	YES	NO
chr15	58791650	58791750	O31	4289	+	Mtss1	YES	NO
chr19	32852550	32852650	O31	2893	-	Pten	YES	NO
chr12	113920650	113920750	O31	2527	-	Zbtb42	YES	NO
chrX	7504150	7504250	O31	2490	-	Eras	YES	NO
chr4	8709950	8710050	O31	2237	-	Chd7	YES	NO
chr11	93735450	93735550	O31	2225	-	Utp18	NO	NO
chr1	9803350	9803450	O31	2054	-	Sgk3	YES	NO
chr16	18230650	18230750	O31	1927	+	Zdhhc8	NO	NO
chr19	32851250	32851350	O31	1787	-	Pten	YES	NO
chr2	73334750	73334850	O31	1566	-	Wipf1	NO	NO
chr5	54509350	54509450	O31	1508	+	Stim2	YES	NO
chrX	148698250	148698350	O31	1477	+	Kdm5c	YES	NO
chr4	47418150	47418250	O31	1362	+	Tgfbr1	YES	NO
chr10	24241750	24241850	O31	1291	+	RP23-232L11.1	NO	NO
chr7	150971850	150971950	O31	1265	-	Mrgpre	YES	NO
chr13	49444350	49444450	O31	1154	-	Bicd2	YES	NO
chr3	97622250	97622350	O31	1138	+	Pde4dip	YES	NO
chr9	78200850	78200950	O31	1131	-	Gsta2	NO	NO
chr15	73244550	73244650	O31	972	+	Ptk2	NO	NO
chr3	125041950	125042050	O31	869	+	Ndst4	NO	NO
chrX	137498450	137498550	O31	860	+	Atg4a	NO	NO
chr13	51841250	51841350	O31	846	-	Sema4d	YES	NO
chr17	78774650	78774750	O31	806	+	Crim1	YES	NO
chr4	88925550	88925650	O31	787	+	Cdkn2a	YES	NO
chr15	15911450	15911550	O31	753	+	SNORA17	NO	NO
chr8	87927750	87927850	O31	740	-	4921524J17Rik	YES	NO
chr7	17185650	17185750	O31	735	+	Grlf1	YES	NO
chr18	35957150	35957250	O31	731	+	Cxxc5	YES	NO
chr8	88073350	88073450	O31	727	-	Dnaja2	NO	NO
chr11	86781550	86781650	O31	718	-	Ypel2	NO	NO
chr1	167601450	167601550	O31	716	+	Rcsd1	NO	NO
chr6	28556050	28556150	O31	684	-	Snd1	NO	NO
chr12	79969450	79969550	O31	683	+	Eif2s1	NO	NO
chr4	118957950	118958050	O31	633	+	Ybx1	NO	NO
chr3	145817450	145817550	O31	628	-	Mcoln2	NO	NO
chr10	73539450	73539550	O31	606	-	Pcdh15	NO	NO
chr7	52147150	52147250	O31	604	-	Med25	YES	NO
chr10	12145450	12145550	O31	596	+	Utrn	NO	NO
chr1	36859850	36859950	O31	595	-	Tmem131	NO	NO
chr16	85162450	85162550	O31	593	-	App	NO	NO
chr12	44742250	44742350	O31	584	+	SNORA33	NO	NO
chr5	65209650	65209750	O31	570	+	Klf3	NO	NO
chr18	14830450	14830550	O31	566	+	Ss18	NO	NO
chr18	77309550	77309650	O31	564	-	Pias2	NO	NO
chr17	42938150	42938250	O31	560	-	Cd2ap	YES	NO
chr16	16566850	16566950	O31	556	+	Fgd4	NO	NO
chr12	69900050	69900150	O31	519	+	5S_rRNA	NO	NO
chr16	24542750	24542850	O31	519	-	Lpp	NO	NO
chr3	76513150	76513250	O31	517	+	Fstl5	NO	NO
chr16	40511050	40511150	O31	513	-	U6	NO	NO
chrX	148698450	148698550	O31	478	-	Kdm5c	YES	NO
chr15	15043750	15043850	O31	478	-	AC165279.1	NO	NO
chr19	21921950	21922050	O31	476	+	Tmem2	YES	NO
chr3	116353950	116354050	O31	466	-	Hiat1	NO	NO
chr6	12383350	12383450	O31	462	+	Thsd7a	YES	NO
chr4	43894450	43894550	O31	459	+	Reck	YES	NO
chr13	91840050	91840150	O31	453	+	Ssbp2	NO	NO
chrX	57534650	57534750	O31	403	-	Atp11c	NO	NO
chr9	86581550	86581650	O31	403	-	Me1	NO	NO
chr9	24929850	24929950	O31	396	+	Herpud2	NO	NO
chr14	99480650	99480750	O31	391	-	Dis3	NO	NO
chr7	100940750	100940850	O31	390	+	AC138594.1	NO	NO
chr3	108702950	108703050	O31	354	+	Prpf38b	NO	NO
chr18	68119250	68119350	O31	348	+	D18Ertd653e	NO	NO
chr4	48038150	48038250	O31	341	+	Nr4a3	NO	NO
chr11	49076850	49076950	O31	341	+	Mgat1	YES	NO
chr16	36920350	36920450	O31	339	+	Golgb1	NO	NO
chr18	55133950	55134050	O31	332	+	Zfp608	NO	NO
chr16	80687950	80688050	O31	327	-	U6	NO	NO
chr6	40662650	40662750	O31	323	+	Mgam	NO	NO
chr3	146113050	146113150	O31	317	-	Ctbs	NO	NO
chr7	144612950	144613050	O31	316	+	9430038I01Rik	NO	NO
chr2	148848350	148848450	O31	313	+	Gm10750	NO	NO
chr10	120279150	120279250	O31	311	+	Msrb3	NO	NO
chr17	84501850	84501950	O31	311	-	Zfp36l2	YES	NO
chr14	62019550	62019650	O31	298	-	Kpna3	NO	NO
chr14	121712850	121712950	O31	278	+	Stk24	NO	NO
chr11	91346350	91346450	O31	272	-	Kif2b	NO	NO
chr13	79287550	79287650	O31	259	-	SNORA48	NO	NO
chr18	31579150	31579250	O31	258	+	Syt4	NO	NO
chr11	11836450	11836550	O31	243	+	Grb10	YES	NO
chr2	29727750	29727850	O31	222	+	Cercam	YES	NO
chr17	74960550	74960650	O31	196	-	Birc6	NO	NO
chr1	141975550	141975650	O31	186	+	Cfh	NO	NO
chr19	24750350	24750450	O31	180	+	E030010A14Rik	NO	NO
chr13	95931850	95931950	O31	165	-	Pde8b	NO	NO
chr5	40278450	40278550	O31	163	+	AC144779.1	NO	NO
chr12	45276750	45276850	O31	161	+	Dnajb9	NO	NO
chr16	17198050	17198150	O31	153	+	Ube2l3	NO	NO
chr18	16858350	16858450	O31	148	-	Cdh2	NO	NO
chr17	26021150	26021250	O31	147	-	Rab40c	NO	NO
chr4	154982150	154982250	O31	135	+	Slc35e2	YES	NO
chr6	47990950	47991050	O31	135	+	Zfp777	NO	NO
chr13	90237950	90238050	O31	124	+	Tmem167	NO	NO
chrX	57145550	57145650	O31	124	+	RP23-395P1.1	NO	NO
chr15	75642950	75643050	O31	117	+	Zc3h3	NO	NO
chr4	122672550	122672650	O31	117	+	Mycl1	NO	NO
chr8	64025250	64025350	O31	116	-	Palld	NO	NO
chr17	67783250	67783350	O31	112	+	Ptprm	NO	NO
chr3	91634050	91634150	O31	110	+	AC163215.1	NO	NO
chr6	31069050	31069150	O31	106	-	RP23-459L15.2	NO	NO
chr12	52761450	52761550	O31	105	+	Strn3	NO	NO
chrX	106308250	106308350	O31	102	+	Sh3bgrl	NO	NO
chr11	30084650	30084750	O31	101	+	Spnb2	YES	NO
chr2	59654050	59654150	O31	89	+	Tanc1	NO	NO
chr17	44101250	44101350	O31	85	+	Rcan2	YES	NO
chr12	68966450	68966550	O31	75	-	U2	NO	NO
chr7	49582650	49582750	O31	66	+	AC158569.1	NO	NO
chr9	65060150	65060250	O31	62	-	Parp16	NO	NO
chr4	66575450	66575550	O31	59	-	Tlr4	NO	NO
chrX	157601950	157602050	O31	58	+	Scml2	YES	NO
chr5	70868350	70868450	O31	56	-	U6	NO	NO
chr19	59410650	59410750	O31	50	-	Pdzd8	NO	NO
chr6	54905750	54905850	O31	46	+	Nod1	NO	NO
chr15	63951450	63951550	O417	23079	-	Asap1	NO	NO
chrX	43509750	43509850	O417	20943	+	RP23-56L5.1	NO	NO
chr9	91940150	91940250	O417	15609	-	Plscr1	NO	NO
chr9	108434250	108434350	O417	14534	+	Qrich1	YES	NO
chr11	78873950	78874050	O417	13701	+	Ksr1	YES	NO
chr5	28496450	28496550	O417	11955	+	BADEN2	NO	NO
chr12	63921750	63921850	O417	9922	-	AC159639.1	NO	NO
chr9	69225950	69226050	O417	9770	-	Rora	NO	NO
chr18	31873050	31873150	O417	8816	+	Sap130	YES	NO
chr2	164815350	164815450	O417	7634	+	Slc12a5	NO	NO
chr2	155272250	155272350	O417	7179	-	Ncoa6	NO	NO
chr2	117013850	117013950	O417	6272	+	mmu-mir-674	NO	NO
chr14	113517150	113517250	O417	5819	+	AC115978.1	NO	NO
chr17	90497250	90497350	O417	5512	+	Nrxn1	NO	NO
chr15	6334350	6334450	O417	5223	-	Dab2	NO	NO
chr9	35113150	35113250	O417	5041	-	BADrepeat	NO	NO
chr5	77600350	77600450	O417	3839	+	Spink2	NO	NO
chr15	96208150	96208250	O417	3785	+	Arid2	YES	NO
chr14	67675350	67675450	O417	3649	-	Ppp2r2a	NO	NO
chr17	63530150	63530250	O417	3268	+	Fbxl17	YES	NO
chr18	77876150	77876250	O417	3085	-	8030462N17Rik	NO	NO
chr7	38757550	38757650	O417	3075	-	C80913	NO	NO
chrX	94563250	94563350	O417	2918	-	Eda2r	NO	NO
chr1	194667150	194667250	O417	2459	-	Sertad4	NO	NO
chr5	103906650	103906750	O417	2408	+	Ptpn13	YES	NO
chr17	51305450	51305550	O417	2192	+	Tbc1d5	NO	NO
chr9	59724150	59724250	O417	2008	+	Myo9a	YES	NO
chr17	88443150	88443250	O417	1858	-	Fbxo11	NO	NO
chr2	38619050	38619150	O417	1658	-	Nr6a1	NO	NO
chr11	102409350	102409450	O417	1656	-	Gpatch8	NO	NO
chr10	50428250	50428350	O417	1650	-	Ascc3	YES	NO
chr1	144343150	144343250	O417	1559	+	Cdc73	NO	NO
chr11	4717450	4717550	O417	1517	-	Nf2	YES	NO
chr9	88364350	88364450	O417	1498	+	Syncrip	NO	NO
chr13	55127250	55127350	O417	1475	+	Uimc1	YES	NO
chr15	102003050	102003150	O417	1338	-	Csad	NO	NO
chr13	55127650	55127750	O417	1332	+	Uimc1	YES	NO
chr3	54607050	54607150	O417	1283	-	Rfxap	NO	NO
chr3	24125550	24125650	O417	1275	+	AC136702.1	NO	NO
chr15	61962250	61962350	O417	1243	+	Pvt1	NO	NO
chr6	32795650	32795750	O417	1207	+	Chchd3	NO	NO
chr13	112604250	112604350	O417	1197	-	RP24-114K21.4	NO	NO
chr1	140378050	140378150	O417	1159	+	Nek7	NO	NO
chr5	8899450	8899550	O417	1115	-	Abcb4	NO	NO
chr3	102855950	102856050	O417	1111	+	Csde1	NO	NO
chr14	89297750	89297850	O417	1076	-	Pcdh20	NO	NO
chr9	65575750	65575850	O417	1060	-	Zfp609	NO	NO
chr3	137415050	137415150	O417	1051	+	U6	NO	NO
chr8	87551950	87552050	O417	1044	-	2310036O22Rik	YES	NO
chr2	80251450	80251550	O417	1029	-	Frzb	NO	NO
chr2	160676650	160676750	O417	1002	+	AL590389.1	NO	NO
chr2	165872350	165872450	O417	991	-	Ncoa3	NO	NO
chr15	44980250	44980350	O417	976	-	Kcnv1	NO	NO
chr4	32754950	32755050	O417	956	+	Mdn1	NO	NO
chr17	63529850	63529950	O417	951	-	Fbxl17	YES	NO
chr14	48328850	48328950	O417	951	-	Ktn1	NO	NO
chr15	65247150	65247250	O417	943	-	U2	NO	NO
chr2	27824450	27824550	O417	937	-	Col5a1	NO	NO
chrX	95023550	95023650	O417	934	-	RP23-147I24.1	NO	NO
chr7	100689150	100689250	O417	929	-	AC102906.1	NO	NO
chr17	72513850	72513950	O417	917	-	Alk	NO	NO
chr15	64974050	64974150	O417	915	+	AC114916.1	NO	NO
chr15	81244650	81244750	O417	915	-	Xpnpep3	NO	NO
chr4	65898950	65899050	O417	914	+	Astn2	NO	NO
chr9	64841350	64841450	O417	905	+	Ptplad1	NO	NO
chr1	50675050	50675150	O417	885	+	7SK	NO	NO
chr6	119661350	119661450	O417	876	+	Erc1	NO	NO
chr14	53174250	53174350	O417	865	+	L1Md-Gf251	NO	NO
chr14	32302850	32302950	O417	855	+	Mettl6	NO	NO
chr16	69172150	69172250	O417	853	+	7SK	NO	NO
chr16	52902350	52902450	O417	852	-	SNORA17	NO	NO
chr14	114220450	114220550	O417	831	+	RP23-255H22.1	NO	NO
chr13	55122950	55123050	O417	819	+	Hk3	YES	NO
chr19	46563450	46563550	O417	818	+	Sufu	NO	NO
chr16	3488250	3488350	O417	818	-	SNORA40	NO	NO
chr6	74429450	74429550	O417	812	-	AC174081.1	NO	NO
chr9	56248450	56248550	O417	802	-	C230081A13Rik	NO	NO
chrX	85139750	85139850	O417	799	-	Il1rapl1	NO	NO
chr18	28993350	28993450	O417	799	+	SNORA17	NO	NO
chr17	87540950	87541050	O417	792	+	Socs5	NO	NO
chrX	18965650	18965750	O417	787	+	RP23-348I7.2	NO	NO
chr10	49671150	49671250	O417	783	-	Grik2	NO	NO
chr3	150791050	150791150	O417	781	+	Eltd1	NO	NO
chr19	32876550	32876650	O417	772	+	Pten	NO	NO
chr11	4719550	4719650	O417	770	+	Nf2	YES	NO
chr12	114589350	114589450	O417	767	+	AI324046	NO	NO
chr5	56578850	56578950	O417	764	-	SNORA17	NO	NO
chr3	67904150	67904250	O417	763	-	Iqcj	NO	NO
chr5	76687050	76687150	O417	755	+	Clock	NO	NO
chr15	69274150	69274250	O417	744	-	SNORA17	NO	NO
chrX	34129350	34129450	O417	736	+	Pgrmc1	NO	NO
chr2	180937450	180937550	O417	728	+	Ptk6	NO	NO
chrX	31937950	31938050	O417	725	-	CU025214.1	NO	NO
chr1	133905650	133905750	O417	725	-	Elk4	NO	NO
chr16	94904550	94904650	O417	725	-	Dyrk1a	NO	NO
chr12	13531350	13531450	O417	721	+	Nbas	NO	NO
chr11	4093650	4093750	O417	718	-	Tbc1d10a	NO	NO
chr17	80438650	80438750	O417	717	+	Hnrpll	NO	NO
chr17	5432050	5432150	O417	704	-	5730437N04Rik	NO	NO
chr12	99540950	99541050	O417	700	-	Gpr65	NO	NO
chr1	129326350	129326450	O417	697	-	Mgat5	NO	NO
chr2	155010250	155010350	O417	686	+	Itch	NO	NO
chr13	50671950	50672050	O417	685	+	mmu-mir-683-2	NO	NO
chr15	44749450	44749550	O417	679	-	U6	NO	NO
chr11	32476250	32476350	O417	676	-	Stk10	NO	NO
chr5	29173750	29173850	O417	674	+	AC121843.1	NO	NO
chr2	98307350	98307450	O417	671	+	BADrepeat	NO	NO
chr7	79943550	79943650	O417	667	-	AC136516.1	NO	NO
chr14	118727450	118727550	O417	665	-	SNORA17	NO	NO
chr4	104777650	104777750	O417	661	-	Prkaa2	NO	NO
chr4	82974350	82974450	O417	660	-	Ttc39b	NO	NO
chr3	77322150	77322250	O417	658	+	SNORA17	NO	NO
chr6	115342250	115342350	O417	657	-	Pparg	NO	NO
chr11	4717950	4718050	O417	653	+	Nf2	YES	NO
chr10	104224650	104224750	O417	647	-	U6	NO	NO
chr3	123043650	123043750	O417	645	+	Sec24d	YES	NO
chr2	124487950	124488050	O417	639	-	Sema6d	NO	NO
chr16	47263750	47263850	O417	639	-	RP23-266E12.1	NO	NO
chr6	21668450	21668550	O417	639	-	Kcnd2	NO	NO
chr11	35452150	35452250	O417	636	-	Slit3	NO	NO
chr18	67585650	67585750	O417	626	+	Afg3l2	NO	NO
chr2	64242650	64242750	O417	625	+	RP23-232I4.1	NO	NO
chr14	60142150	60142250	O417	620	-	Cab39l	NO	NO
chr4	136331850	136331950	O417	596	-	Ephb2	NO	NO
chr18	83034050	83034150	O417	576	-	AC113104.1	NO	NO
chr17	8382950	8383050	O417	575	-	Fgfr1op	NO	NO
chr14	95518950	95519050	O417	572	-	SNORA17	NO	NO
chr10	92744750	92744850	O417	569	+	Elk3	NO	NO
chr17	32445050	32445150	O417	559	-	Akap8	NO	NO
chr17	82858850	82858950	O417	558	+	AC166163.1	NO	NO
chrX	13810050	13810150	O417	555	-	Gm5382	NO	NO
chr15	47236050	47236150	O417	554	+	Csmd3	NO	NO
chr11	45898850	45898950	O417	553	-	Adam19	NO	NO
chr5	151851750	151851850	O417	537	+	Stard13	NO	NO
chr15	45441150	45441250	O417	537	-	Kcnv1	NO	NO
chr6	21025350	21025450	O417	536	+	U6	NO	NO
chr18	64066050	64066150	O417	533	+	Wdr7	NO	NO
chr5	151428050	151428150	O417	525	+	N4bp2l2	YES	NO
chr2	41690750	41690850	O417	523	+	Lrp1b	NO	NO
chr18	5258050	5258150	O417	522	-	Zfp438	NO	NO
chr4	27136150	27136250	O417	521	-	RP23-154A10.2	NO	NO
chr15	96867450	96867550	O417	515	+	Slc38a4	NO	NO
chr9	107671650	107671750	O417	509	-	Rbm5	NO	NO
chr8	114174350	114174450	O417	500	+	Zfp1	NO	NO
chrX	161427250	161427350	O417	497	+	Fancb	NO	NO
chr10	40665850	40665950	O417	496	-	Wasf1	NO	NO
chr2	174010250	174010350	O417	494	-	AL669896.1	NO	NO
chr3	45333950	45334050	O417	489	-	Pcdh10	NO	NO
chr19	7431950	7432050	O417	486	-	AI846148	NO	NO
chr3	118750750	118750850	O417	483	+	Dpyd	NO	NO
chr13	55226950	55227050	O417	480	-	Zfp346	YES	NO
chr10	53268550	53268650	O417	477	+	Mcm9	NO	NO
chr4	108050250	108050350	O417	473	+	Fam159a	NO	NO
chr2	160671350	160671450	O417	465	+	AL590389.1	NO	NO
chr3	140808950	140809050	O417	455	+	Pdha2	NO	NO
chr16	34834250	34834350	O417	450	-	Mylk	NO	NO
chr17	91883650	91883750	O417	424	-	RP23-222O19.1	NO	NO
chr10	90350750	90350850	O417	411	+	Anks1b	NO	NO
chr8	26497750	26497850	O417	399	+	AC116529.1	NO	NO
chr17	32123650	32123750	O417	396	-	Hsf2bp	NO	NO
chr12	40495150	40495250	O417	396	+	SNORA17	NO	NO
chr15	79515450	79515550	O417	394	-	Josd1	NO	NO
chr11	56171850	56171950	O417	389	-	snoR38	NO	NO
chr3	22022050	22022150	O417	387	-	Tbl1xr1	NO	NO
chr6	146846350	146846450	O417	387	-	Ppfibp1	YES	NO
chr11	4719250	4719350	O417	383	+	Nf2	YES	NO
chr15	16951950	16952050	O417	355	-	Cdh9	NO	NO
chr9	106695950	106696050	O417	353	+	Rad54l2	NO	NO
chr14	83316750	83316850	O417	353	+	snR78	NO	NO
chr11	42822650	42822750	O417	343	-	Gm9972	NO	NO
chr1	9646950	9647050	O417	324	-	Mybl1	NO	NO
chr8	90175450	90175550	O417	324	+	Zfp423	NO	NO
chr7	55204750	55204850	O417	318	-	Mrgpra4	NO	NO
chrX	126513750	126513850	O417	312	+	Diap2	NO	NO
chr1	83488650	83488750	O417	308	+	Sphkap	NO	NO
chr15	43234350	43234450	O417	300	+	AC099621.1	YES	NO
chr15	6728150	6728250	O417	295	-	Rictor	NO	NO
chr16	3453950	3454050	O417	293	+	SNORA40	NO	NO
chr13	63891750	63891850	O417	289	-	0610007P08Rik	NO	NO
chr1	58786750	58786850	O417	289	-	Cflar	NO	NO
chr14	49840350	49840450	O417	283	+	1700011H14Rik	NO	NO
chr4	36190750	36190850	O417	278	-	Lingo2	NO	NO
chr8	96961550	96961650	O417	271	-	9330175E14Rik	NO	NO
chr10	39113950	39114050	O417	271	+	Fyn	NO	NO
chr17	92322250	92322350	O417	270	+	SNORA17	NO	NO
chr1	87986350	87986450	O417	265	-	Psmd1	NO	NO
chr15	29158050	29158150	O417	247	+	SNORA17	NO	NO
chr10	53297050	53297150	O417	245	+	Mcm9	NO	NO
chr2	103818550	103818650	O417	244	+	4931422A03Rik	NO	NO
chr3	36149650	36149750	O417	242	-	Qrfpr	NO	NO
chr2	110717050	110717150	O417	238	+	Ano3	NO	NO
chr8	48347750	48347850	O417	230	-	Stox2	NO	NO
chr5	103907750	103907850	O417	228	+	Ptpn13	YES	NO
chr18	15418550	15418650	O417	219	+	Kctd1	NO	NO
chr17	27425150	27425250	O417	216	-	RP24-333C3.1	NO	NO
chr16	30346250	30346350	O417	211	+	Atp13a3	NO	NO
chr3	84702250	84702350	O417	210	-	Arfip1	NO	NO
chr15	64114850	64114950	O417	199	-	9130004J05Rik	NO	NO
chr15	40534550	40534650	O417	199	+	Zfpm2	NO	NO
chr12	104485450	104485550	O417	193	-	Prima1	NO	NO
chr9	114777150	114777250	O417	191	+	Cmtm8	NO	NO
chr4	11687450	11687550	O417	184	+	Cdh17	NO	NO
chr14	50512850	50512950	O417	178	+	Olfr722	NO	NO
chr2	113898950	113899050	O417	177	+	RP23-230H3.2	NO	NO
chr13	12315250	12315350	O417	177	-	Mtr	NO	NO
chr13	55127350	55127450	O417	173	+	Uimc1	YES	NO
chr10	76037850	76037950	O417	165	+	Ftcd	NO	NO
chr10	42520050	42520150	O417	152	-	Sec63	NO	NO
chr4	19529350	19529450	O417	151	+	Fam82b	NO	NO
chr15	88501450	88501550	O417	151	-	Brd1	NO	NO
chr2	65700050	65700150	O417	145	+	Csrnp3	NO	NO
chr2	22821950	22822050	O417	142	+	Abi1	NO	NO
chr5	67552350	67552450	O417	140	-	Phox2b	NO	NO
chr2	100160150	100160250	O417	138	+	RP24-576M16.1	NO	NO
chr18	27005150	27005250	O417	135	-	RNaseP_nuc	NO	NO
chr15	71934850	71934950	O417	129	+	Col22a1	NO	NO
chr18	32022750	32022850	O417	129	-	Wdr33	NO	NO
chr18	81089150	81089250	O417	128	+	Atp9b	NO	NO
chr5	65380850	65380950	O417	120	+	Fam114a1	NO	NO
chr3	61173550	61173650	O417	112	+	Rap2b	YES	NO
chr5	130467250	130467350	O417	110	-	Gusb	NO	NO
chr3	111418050	111418150	O417	110	-	SNORA17	NO	NO
chr1	120414750	120414850	O417	106	-	Clasp1	NO	NO
chr6	63277150	63277250	O417	106	+	Grid2	NO	NO
chr4	108853750	108853850	O417	103	-	Osbpl9	NO	NO
chr6	128823350	128823450	O417	103	+	RP24-127M20.2	NO	NO
chr2	87051450	87051550	O417	96	-	Olfr1113	NO	NO
chr9	64691850	64691950	O417	96	+	Dennd4a	NO	NO
chr4	153529450	153529550	O417	91	+	Wdr8	NO	NO
chr15	47286250	47286350	O417	89	-	Csmd3	NO	NO
chr16	23864050	23864150	O417	87	+	Sst	NO	NO
chr3	115475950	115476050	O417	86	+	Gm9889	NO	NO
chrX	91408850	91408950	O417	77	-	Eif2s3x	NO	NO
chr1	11182450	11182550	O417	77	-	Prex2	NO	NO
chr12	82998650	82998750	O417	75	-	Pcnx	NO	NO
chr15	88530750	88530850	O417	75	-	Brd1	NO	NO
chr12	44395850	44395950	O417	75	+	SNORA33	NO	NO
chr3	48818850	48818950	O417	69	-	U1	NO	NO
chr16	17049550	17049650	O417	67	+	RP24-83P13.2	NO	NO
chr18	27943250	27943350	O417	58	-	AC102562.1	NO	NO
chrX	119920350	119920450	O417	56	-	RP23-119F1.1	NO	NO
chr6	12586450	12586550	O417	55	-	Thsd7a	NO	NO
chr9	35739650	35739750	O417	55	+	AC157512.1	NO	NO
chr4	113899950	113900050	O417	55	-	Skint11	NO	NO
chr5	151428050	151428150	O417	53	-	N4bp2l2	YES	NO
chr6	69879950	69880050	O417	53	-	AC154006.7	NO	NO
chr3	76177850	76177950	O417	50	+	Fstl5	NO	NO
chr9	5051750	5051850	O417	50	+	SNORA16	NO	NO
chr3	78992450	78992550	O73	24105	-	Rapgef2	YES	NO
chr17	33802350	33802450	O73	18974	-	Hnrnpm	YES	NO
chr12	52932050	52932150	O73	17971	-	Gm5785	YES	NO
chr4	137721050	137721150	O73	15135	-	Eif4g3	YES	NO
chrX	138815450	138815550	O73	14013	-	Acsl4	YES	NO
chr16	34054750	34054850	O73	13538	+	Kalrn	YES	NO
chr2	91729450	91729550	O73	12999	-	Ambra1	YES	NO
chrX	7503650	7503750	O73	12488	-	Eras	YES	NO
chr6	119969750	119969850	O73	12020	+	Hsn2	YES	NO
chr13	43159050	43159150	O73	11558	-	Phactr1	YES	NO
chr3	130851650	130851750	O73	11346	-	Lef1	YES	NO
chr10	127543150	127543250	O73	10552	-	Baz2a	YES	NO
chr6	115381850	115381950	O73	10077	+	Pparg	YES	NO
chr17	30143450	30143550	O73	9482	-	Zfand3	YES	NO
chr4	41259250	41259350	O73	9221	+	Dcaf12	YES	NO
chr10	19660050	19660150	O73	8550	-	Map3k5	YES	NO
chr13	23455250	23455350	O73	7464	+	RP23-9O13.8	YES	NO
chr2	58371250	58371350	O73	7376	-	Acvr1	YES	NO
chr3	51808950	51809050	O73	7221	-	Maml3	YES	NO
chr4	136881950	136882050	O73	7028	+	Cdc42	YES	NO
chr19	17029650	17029750	O73	6972	-	Prune2	YES	NO
chr18	32067750	32067850	O73	6692	+	Wdr33	YES	NO
chr7	87212050	87212150	O73	5982	+	Zfp710	YES	NO
chr12	78060950	78061050	O73	5881	+	Max	YES	NO
chr1	137879950	137880050	O73	5591	-	Igfn1	YES	NO
chr6	119983350	119983450	O73	4522	+	Hsn2	YES	NO
chr16	74066950	74067050	O73	4379	-	Robo2	YES	NO
chr3	52844450	52844550	O73	4269	+	Lhfp	YES	NO
chr9	21042350	21042450	O73	3811	-	Keap1	YES	NO
chr1	64777750	64777850	O73	3134	+	AC101915.1	YES	NO
chr6	39595550	39595650	O73	2811	-	Braf	YES	NO
chr4	89690950	89691050	O73	2750	-	RP23-258D11.1	NO	NO
chr2	91631450	91631550	O73	2711	-	Ambra1	YES	NO
chr1	164094350	164094450	O73	2255	-	Dnm3	NO	NO
chr19	53981150	53981250	O73	1800	-	Pdcd4	NO	NO
chr6	40690650	40690750	O73	1758	-	Mgam	NO	NO
chr19	47444850	47444950	O73	1735	+	Sh3pxd2a	NO	NO
chr14	33814650	33814750	O73	1566	-	Lrrc18	YES	NO
chr6	115600750	115600850	O73	1521	-	Raf1	NO	NO
chr6	86119450	86119550	O73	1466	-	Tgfa	NO	NO
chr4	88942150	88942250	O73	1154	-	Cdkn2a	YES	NO
chr8	18743150	18743250	O73	1059	-	Mcph1	YES	NO
chr9	114662850	114662950	O73	949	-	Cmtm7	NO	NO
chr14	52704350	52704450	O73	934	+	Hnrnpc	YES	NO
chr8	121985150	121985250	O73	898	-	Necab2	YES	NO
chr11	51580050	51580150	O73	724	+	Sar1b	NO	NO
chr19	4808750	4808850	O73	703	+	Rbm14	NO	NO
chr8	66825350	66825450	O73	698	-	Tll1	NO	NO
chr16	77569250	77569350	O73	685	+	2810055G20Rik	NO	NO
chr13	116876250	116876350	O73	632	+	Gm10733	NO	NO
chr14	15335350	15335450	O73	624	-	Il3ra	YES	NO
chr13	101881250	101881350	O73	530	+	AC153153.1	YES	NO
chr2	91682050	91682150	O73	493	-	Ambra1	YES	NO
chrX	51566850	51566950	O73	483	-	RP23-315F2.1	NO	NO
chr4	126439550	126439650	O73	449	+	AU040320	YES	NO
chr16	57553550	57553650	O73	436	-	Filip1l	NO	NO
chr8	26633150	26633250	O73	395	+	Fgfr1	NO	NO
chr9	111763550	111763650	O73	388	+	Stac	NO	NO
chr3	44125250	44125350	O73	376	-	7SK	NO	NO
chr4	3704350	3704450	O73	359	+	Lyn	NO	NO
chr2	107771950	107772050	O73	356	+	SNORA17	NO	NO
chr4	31986250	31986350	O73	334	-	Map3k7	NO	NO
chr6	28708250	28708350	O73	333	+	Snd1	NO	NO
chr13	88307050	88307150	O73	332	+	Edil3	NO	NO
chr2	91629950	91630050	O73	326	-	Ambra1	YES	NO
chr2	8345650	8345750	O73	326	+	7SK	NO	NO
chr15	73199850	73199950	O73	324	+	Ptk2	NO	NO
chr3	135308150	135308250	O73	323	+	Nfkb1	NO	NO
chr1	57245550	57245650	O73	323	-	AC101777.1	YES	NO
chr10	104951850	104951950	O73	318	+	Tmtc2	NO	NO
chr18	25620250	25620350	O73	315	+	AW554918	NO	NO
chr4	9435850	9435950	O73	312	-	Asph	NO	NO
chr1	94042850	94042950	O73	310	+	Hdac4	NO	NO
chr6	120151650	120151750	O73	300	+	Ninj2	NO	NO
chr4	143377850	143377950	O73	296	-	Gm13023	NO	NO
chr12	35278550	35278650	O73	292	-	Hdac9	NO	NO
chr15	98865850	98865950	O73	292	-	Tuba1c	NO	NO
chr11	59539050	59539150	O73	290	+	Mprip	NO	NO
chr2	107830450	107830550	O73	287	+	SNORA17	NO	NO
chr15	25678550	25678650	O73	285	+	Myo10	NO	NO
chr15	37934650	37934750	O73	282	+	Ubr5	YES	NO
chr18	14820950	14821050	O73	277	-	Ss18	NO	NO
chr15	58629050	58629150	O73	272	+	Tmem65	NO	NO
chr2	174604250	174604350	O73	255	-	Edn3	NO	NO
chr4	71840550	71840650	O73	253	+	Tle1	NO	NO
chr2	110048950	110049050	O73	253	-	RP23-300M9.2	NO	NO
chr11	4968050	4968150	O73	250	+	Ewsr1	NO	NO
chrX	8140250	8140350	O73	249	-	Ssxb6	NO	NO
chr8	53198550	53198650	O73	248	+	AC140437.2	NO	NO
chr19	56637350	56637450	O73	248	+	Nhlrc2	NO	NO
chr10	85414850	85414950	O73	244	-	D10Wsu52e	NO	NO
chr2	104302450	104302550	O73	243	-	Hipk3	NO	NO
chr11	74502250	74502350	O73	239	-	Pafah1b1	NO	NO
chr13	65176050	65176150	O73	235	-	Hiatl1	NO	NO
chr17	86760750	86760850	O73	230	+	Prkce	NO	NO
chr2	148365350	148365450	O73	230	-	RP23-70N3.6	NO	NO
chr10	86629950	86630050	O73	222	+	1700113H08Rik	NO	NO
chr1	64330550	64330650	O73	212	+	RP23-45M23.2	NO	NO
chr18	31989050	31989150	O73	209	+	Wdr33	YES	NO
chr8	72477550	72477650	O73	204	+	Gatad2a	NO	NO
chrX	90754350	90754450	O73	204	+	Pola1	NO	NO
chr19	57691750	57691850	O73	202	+	Atrnl1	NO	NO
chrX	102418550	102418650	O73	200	+	RP23-82A12.4	NO	NO
chr2	60643050	60643150	O73	199	-	Rbms1	NO	NO
chr9	72186050	72186150	O73	199	+	Zfp280d	NO	NO
chr1	90475450	90475550	O73	199	+	Glrp1	NO	NO
chr10	82799750	82799850	O73	198	+	Slc41a2	NO	NO
chr3	29399950	29400050	O73	188	+	6130401L20Rik	NO	NO
chr16	13741950	13742050	O73	184	+	RP23-331D17.2	YES	NO
chr2	67531650	67531750	O73	183	-	RP23-262O4.1	NO	NO
chr4	26612150	26612250	O73	181	+	RP23-153J22.1	NO	NO
chr7	98738150	98738250	O73	178	-	Dlg2	NO	NO
chr13	117226750	117226850	O73	177	+	Isl1	NO	NO
chr12	104643350	104643450	O73	176	-	Otub2	NO	NO
chr4	72397550	72397650	O73	176	-	Aldoart1	NO	NO
chr13	22822450	22822550	O73	173	+	RP23-75H1.2	NO	NO
chr4	29078750	29078850	O73	170	+	RP23-200B23.4	NO	NO
chr7	124678750	124678850	O73	168	-	Xylt1	NO	NO
chr2	117760750	117760850	O73	167	+	RP23-75E19.1	NO	NO
chr16	76360850	76360950	O73	165	-	Nrip1	NO	NO
chr1	131411950	131412050	O73	165	+	Thsd7b	NO	NO
chr12	80660450	80660550	O73	165	-	Rad51l1	NO	NO
chr18	61252150	61252250	O73	162	+	Pdgfrb	YES	NO
chr1	60506350	60506450	O73	161	-	Abi2	NO	NO
chr2	45940750	45940850	O73	155	-	SNORA17	NO	NO
chr13	107785250	107785350	O73	155	+	Kif2a	NO	NO
chr2	41293950	41294050	O73	154	-	Lrp1b	NO	NO
chr1	180265450	180265550	O73	153	+	Hnrnpu	NO	NO
chr9	39154350	39154450	O73	152	+	Olfr948	NO	NO
chr6	80547150	80547250	O73	151	+	Lrrtm4	NO	NO
chrX	80132750	80132850	O73	149	-	7SK	NO	NO
chr1	107585850	107585950	O73	148	+	2310035C23Rik	NO	NO
chr14	31101450	31101550	O73	143	+	Cacna1d	NO	NO
chr1	193900150	193900250	O73	142	-	Traf5	NO	NO
chr15	38648450	38648550	O73	140	-	Atp6v1c1	NO	NO
chr2	60084950	60085050	O73	140	-	2015-03-07	NO	NO
chr2	90398150	90398250	O73	139	-	Ptprj	NO	NO
chr12	25543050	25543150	O73	134	+	Mboat2	NO	NO
chr12	44256350	44256450	O73	133	+	SNORA33	NO	NO
chr19	24204950	24205050	O73	130	-	Tjp2	NO	NO
chr16	75408550	75408650	O73	130	-	Lipi	NO	NO
chr7	94524450	94524550	O73	130	+	Nox4	NO	NO
chr19	15505550	15505650	O73	129	+	AC104095.1	NO	NO
chr1	163760350	163760450	O73	128	-	AI848100	NO	NO
chr19	52338050	52338150	O73	128	+	Ins1	NO	NO
chr6	28688650	28688750	O73	128	-	Snd1	NO	NO
chr2	142530450	142530550	O73	127	-	Kif16b	NO	NO
chr10	66671550	66671650	O73	123	+	Jmjd1c	NO	NO
chr4	67204050	67204150	O73	123	+	Hmgb1-rs18	NO	NO
chr2	91607950	91608050	O73	123	-	Ambra1	YES	NO
chr13	8244750	8244850	O73	121	-	Adarb2	NO	NO
chr8	106878150	106878250	O73	118	+	Cmtm4	NO	NO
chrX	11631450	11631550	O73	115	-	Bcor	NO	NO
chr2	93096150	93096250	O73	113	+	Tspan18	NO	NO
chr6	119010550	119010650	O73	109	-	Cacna1c	NO	NO
chr3	72339950	72340050	O73	109	-	U2	NO	NO
chr4	147998450	147998550	O73	109	+	Tardbp	NO	NO
chr10	57918150	57918250	O73	106	-	Ranbp2	NO	NO
chr8	83444150	83444250	O73	106	-	Gab1	NO	NO
chr3	122537850	122537950	O73	105	-	Pde5a	NO	NO
chr6	28617850	28617950	O73	103	-	Snd1	NO	NO
chr14	120871250	120871350	O73	99	-	Rap2a	NO	NO
chr11	11119950	11120050	O73	93	-	AL663071.1	NO	NO
chr2	92431050	92431150	O73	92	-	Chst1	NO	NO
chr10	76071650	76071750	O73	85	-	Col6a2	NO	NO
chr7	117248050	117248150	O73	84	+	Zfp143	NO	NO
chr15	42860050	42860150	O73	79	-	Rspo2	NO	NO
chrX	121244750	121244850	O73	77	+	Vmn2r121	NO	NO
chr4	117871150	117871250	O73	77	-	Ptprf	NO	NO
chr6	90664150	90664250	O73	77	+	Iqsec1	NO	NO
chr12	107079550	107079650	O73	76	-	Papola	NO	NO
chrX	68484050	68484150	O73	76	+	Mtm1	NO	NO
chr6	115244850	115244950	O73	75	+	Syn2	NO	NO
chr13	80134450	80134550	O73	73	+	U4	NO	NO
chr13	43570350	43570450	O73	72	-	Ranbp9	NO	NO
chr12	103076850	103076950	O73	72	-	Tc2n	NO	NO
chr2	89220250	89220350	O73	71	+	Olfr1235-ps1	NO	NO
chr1	187293550	187293650	O73	62	-	Slc30a10	NO	NO
chr7	99600450	99600550	O73	62	-	Dlg2	NO	NO
chr11	106066050	106066150	O73	58	+	Ccdc47	NO	NO
chr6	144110850	144110950	O73	58	-	Sox5	NO	NO
chr1	31071450	31071550	O73	58	-	AC121911.2	NO	NO
chr5	115966050	115966150	O73	58	-	Pxn	NO	NO
chr6	38539950	38540050	O73	57	-	Luc7l2	NO	NO
chr5	29096450	29096550	O73	56	-	AC121843.1	NO	NO
chr2	159086950	159087050	O73	55	+	SNORA17	NO	NO
chr13	73966550	73966650	O73	53	-	Nkd2	NO	NO
chr2	141299850	141299950	O73	47	+	Macrod2	NO	NO
chrX	20209050	20209150	O73	46	+	Rbm10	NO	NO
chr4	136114750	136114850	O74	50282	+	Kdm1a	YES	NO
chr19	32875650	32875750	O74	50266	-	Pten	YES	NO
chr18	84213250	84213350	O74	21779	+	Tshz1	YES	NO
chr15	34025350	34025450	O74	18039	+	Mtdh	NO	NO
chr14	94049250	94049350	O74	16772	-	Pcdh9	NO	NO
chr14	27342550	27342650	O74	15048	+	Slmap	NO	NO
chr4	88923450	88923550	O74	14699	+	Cdkn2a	YES	NO
chr16	73719750	73719850	O74	14129	-	Robo2	NO	NO
chr13	51845750	51845850	O74	10856	-	Sema4d	YES	NO
chr8	123025350	123025450	O74	10535	+	Galnt2	NO	NO
chr14	121763750	121763850	O74	7974	-	Stk24	YES	NO
chr4	133298150	133298250	O74	7386	+	Arid1a	YES	NO
chr19	46237250	46237350	O74	7299	-	Gbf1	YES	NO
chr12	77473350	77473450	O74	6254	-	Zbtb1	YES	NO
chr17	43170150	43170250	O74	4640	-	Tnfrsf21	YES	NO
chr7	87801350	87801450	O74	4245	+	Crtc3	YES	NO
chr6	67225250	67225350	O74	3747	+	Serbp1	YES	NO
chr1	30389050	30389150	O74	3558	-	AC126798.1	NO	NO
chr3	68928350	68928450	O74	3553	-	Kpna4	NO	NO
chr7	138006050	138006150	O74	3199	+	Fgfr2	YES	NO
chr7	74438750	74438850	O74	2638	+	Mef2a	YES	NO
chr16	33383050	33383150	O74	2099	+	Zfp148	NO	NO
chr9	88356350	88356450	O74	1869	+	Syncrip	YES	NO
chr7	78936650	78936750	O74	1441	+	Mctp2	NO	NO
chr6	119979150	119979250	O74	1354	-	Hsn2	NO	NO
chr2	154597750	154597850	O74	1344	+	RP23-480H10.1	NO	NO
chr9	98969550	98969650	O74	1218	-	Pik3cb	NO	NO
chr4	77530750	77530850	O74	1172	+	Ptprd	NO	NO
chr9	123224450	123224550	O74	1116	-	AC164123.1	NO	NO
chr8	47064450	47064550	O74	1105	-	Ufsp2	NO	NO
chr3	45113850	45113950	O74	1070	+	AC158956.1	NO	NO
chr16	27007750	27007850	O74	1064	+	Gm606	NO	NO
chr2	94939550	94939650	O74	1007	-	RP23-338L13.1	NO	NO
chr9	37405550	37405650	O74	1007	+	Spa17	NO	NO
chr17	75935950	75936050	O74	991	-	Fam98a	YES	NO
chr12	64682850	64682950	O74	989	+	U6	NO	NO
chr1	53813150	53813250	O74	969	-	Stk17b	NO	NO
chr6	13058150	13058250	O74	968	+	SNORA17	NO	NO
chr8	91181050	91181150	O74	966	+	Nod2	NO	NO
chr7	115454750	115454850	O74	944	+	Olfr491	NO	NO
chrX	78463950	78464050	O74	942	-	RP23-217L21.1	NO	NO
chr7	19792150	19792250	O74	932	+	Eml2	NO	NO
chr3	153906250	153906350	O74	915	+	Slc44a5	NO	NO
chr19	37283750	37283850	O74	912	+	2015-03-05	NO	NO
chr16	64866950	64867050	O74	885	-	Cggbp1	NO	NO
chr11	66455550	66455650	O74	863	-	RP23-475F22.1	NO	NO
chr8	16170950	16171050	O74	838	+	Csmd1	NO	NO
chr10	128209350	128209450	O74	826	+	AC131081.1	NO	NO
chr13	25717650	25717750	O74	820	+	RP23-313I15.1	NO	NO
chr12	52688750	52688850	O74	819	+	Coch	NO	NO
chr5	102342750	102342850	O74	808	+	Wdfy3	NO	NO
chr4	15895350	15895450	O74	796	+	Nbn	NO	NO
chr4	96241650	96241750	O74	795	-	Cyp2j9	NO	NO
chr6	53469950	53470050	O74	793	+	Creb5	NO	NO
chr11	55372450	55372550	O74	784	+	Glra1	NO	NO
chr4	11299450	11299550	O74	772	-	Esrp1	NO	NO
chr13	83796350	83796450	O74	761	-	Mef2c	NO	NO
chr10	59823150	59823250	O74	756	+	Cdh23	NO	NO
chr3	117672050	117672150	O74	752	-	Snx7	NO	NO
chr14	40009350	40009450	O74	752	+	Nrg3	NO	NO
chr3	14364250	14364350	O74	747	-	U7	NO	NO
chr8	48329450	48329550	O74	741	-	Stox2	NO	NO
chr9	45688850	45688950	O74	731	+	Rnf214	NO	NO
chr10	71811650	71811750	O74	730	+	AC104920.1	NO	NO
chr1	84705150	84705250	O74	715	+	Dner	NO	NO
chr2	33261750	33261850	O74	707	+	Zbtb34	NO	NO
chr4	101021550	101021650	O74	693	-	RP23-32L21.4	NO	NO
chr15	30193350	30193450	O74	685	+	Ctnnd2	NO	NO
chr8	39743650	39743750	O74	669	+	Sgcz	NO	NO
chr6	92116150	92116250	O74	667	+	Nr2c2	NO	NO
chr7	92385350	92385450	O74	665	+	AC101719.1	NO	NO
chr4	123239650	123239750	O74	636	-	Macf1	YES	NO
chr10	7362450	7362550	O74	627	+	Pcmt1	NO	NO
chr13	54707550	54707650	O74	622	+	Cltb	NO	NO
chr8	119475550	119475650	O74	611	+	Atmin	NO	NO
chr14	93185950	93186050	O74	599	+	Pcdh9	NO	NO
chr8	24108550	24108650	O74	588	+	Ank1	NO	NO
chr19	36911550	36911650	O74	582	+	Tnks2	NO	NO
chr11	29078350	29078450	O74	580	-	Smek2	NO	NO
chr15	66480550	66480650	O74	562	+	Phf20l1	NO	NO
chr18	38241850	38241950	O74	556	+	Arap3	NO	NO
chr1	95295950	95296050	O74	553	-	Ano7	NO	NO
chr9	86418250	86418350	O74	538	-	Dopey1	NO	NO
chr10	5658250	5658350	O74	527	+	Esr1	NO	NO
chr10	102838950	102839050	O74	526	+	Slc6a15	NO	NO
chr5	15586750	15586850	O74	522	+	Cacna2d1	NO	NO
chr1	188634350	188634450	O74	512	-	Rrp15	NO	NO
chr9	56882650	56882750	O74	510	-	Ptpn9	NO	NO
chr15	44847250	44847350	O74	506	+	AC100733.2	NO	NO
chr9	30247950	30248050	O74	505	+	Snx19	NO	NO
chr8	128092050	128092150	O74	488	-	AC073946.1	NO	NO
chr8	93425750	93425850	O74	487	+	Chd9	NO	NO
chr17	3369750	3369850	O74	486	+	Tiam2	YES	NO
chr15	95546650	95546750	O74	476	-	AC107757.1	NO	NO
chr15	34023150	34023250	O74	459	+	Mtdh	NO	NO
chr3	33710950	33711050	O74	459	+	Ttc14	NO	NO
chr9	62107550	62107650	O74	455	-	Spesp1	NO	NO
chr9	106741650	106741750	O74	434	-	Armet	NO	NO
chr2	59503750	59503850	O74	423	-	Tanc1	NO	NO
chr4	16637850	16637950	O74	421	+	RP23-360O17.1	NO	NO
chr1	53941150	53941250	O74	421	-	Hecw2	NO	NO
chr7	97329050	97329150	O74	419	-	Picalm	YES	NO
chr14	67648350	67648450	O74	410	-	Ppp2r2a	NO	NO
chr8	92921550	92921650	O74	405	-	Tox3	NO	NO
chr4	154872150	154872250	O74	400	-	Gnb1	NO	NO
chr14	97400050	97400150	O74	390	-	SNORA17	NO	NO
chr6	113204450	113204550	O74	385	-	Mtmr14	NO	NO
chr8	81719950	81720050	O74	368	-	Zfp827	NO	NO
chr19	3655850	3655950	O74	339	+	Lrp5	NO	NO
chr2	68156850	68156950	O74	324	-	Stk39	NO	NO
chrX	16729550	16729650	O74	305	-	Efhc2	NO	NO
chr5	38333150	38333250	O74	296	-	Stx18	NO	NO
chr16	93655450	93655550	O74	286	-	7SK	NO	NO
chr17	3350450	3350550	O74	279	-	AC165953.1	YES	NO
chr12	8693850	8693950	O74	275	-	Pum2	NO	NO
chr6	59767950	59768050	O74	269	+	SNORA44	NO	NO
chr3	76148850	76148950	O74	254	-	Fstl5	NO	NO
chr2	119230350	119230450	O74	249	+	Ino80	YES	NO
chr8	86935250	86935350	O74	245	+	Cacna1a	NO	NO
chr2	34304150	34304250	O74	238	+	Mapkap1	NO	NO
chr18	90058350	90058450	O74	237	+	Dok6	NO	NO
chr12	69004150	69004250	O74	234	-	U2	NO	NO
chr8	127190450	127190550	O74	203	-	2310022B05Rik	YES	NO
chr16	57297550	57297650	O74	203	-	2610528E23Rik	NO	NO
chrX	9330650	9330750	O74	202	-	Dynlt3	NO	NO
chr13	99621050	99621150	O74	191	+	Tnpo1	NO	NO
chr16	96382850	96382950	O74	169	-	Lca5l	NO	NO
chr6	28509250	28509350	O74	168	-	Snd1	NO	NO
chr3	123718550	123718650	O74	166	+	AC115832.1	NO	NO
chr8	104908550	104908650	O74	161	+	AC105256.1	NO	NO
chr7	74440650	74440750	O74	145	-	Mef2a	YES	NO
chr15	26602850	26602950	O74	141	-	Fbxl7	NO	NO
chr2	119299750	119299850	O74	141	+	Ino80	YES	NO
chr6	76145450	76145550	O74	135	+	U1	NO	NO
chr10	41112750	41112850	O74	129	-	U6	NO	NO
chr11	76669750	76669850	O74	128	-	Cpd	NO	NO
chr1	141503950	141504050	O74	128	+	Cfhr1	NO	NO
chr13	28255450	28255550	O74	123	+	Prl5a1	NO	NO
chr8	83356250	83356350	O74	115	-	Gab1	NO	NO
chr15	92023150	92023250	O74	110	-	Cntn1	NO	NO
chr1	135667150	135667250	O74	108	+	Atp2b4	NO	NO
chr1	62723550	62723650	O74	100	-	RP23-20G7.2	NO	NO
chr2	163455050	163455150	O74	89	+	AL591488.2	NO	NO
chr17	67527350	67527450	O74	88	+	Ptprm	NO	NO
chr4	132206750	132206850	O74	79	+	Eya3	NO	NO
chr8	46800050	46800150	O74	71	-	Sorbs2	NO	NO
chr8	73874150	73874250	O74	70	+	Myo9b	NO	NO
chr10	111923750	111923850	O74	70	-	Kcnc2	NO	NO
chr14	24540350	24540450	O74	68	+	Kcnma1	NO	NO
chr2	41274750	41274850	O74	68	-	Lrp1b	NO	NO
chr4	36448050	36448150	O74	67	-	Lingo2	NO	NO
chr8	67004650	67004750	O74	65	-	mmu-mir-710	NO	NO
chr1	42855450	42855550	O74	65	+	Mrps9	NO	NO
chr10	58369550	58369650	O74	63	-	Sh3rf3	NO	NO
chr5	77774950	77775050	O74	62	+	Polr2b	NO	NO
chr6	25814150	25814250	O74	62	-	Pot1a	NO	NO
chr1	82729550	82729650	O74	62	-	Mff	NO	NO
chr8	4628250	4628350	O74	62	+	BC003267	YES	NO
chr8	127566450	127566550	O74	61	+	Tsnax	NO	NO
chr7	97292550	97292650	O74	60	-	Picalm	YES	NO
chr8	34211550	34211650	O74	58	+	AC153789.1	NO	NO
chr4	56427250	56427350	O74	56	-	RP23-301G2.1	NO	NO
chr4	25152050	25152150	O74	56	-	Fhl5	NO	NO
chr1	38187550	38187650	O74	55	-	Rev1	NO	NO
chr1	119272050	119272150	O74	54	-	U1	NO	NO
chr17	56681950	56682050	O74	51	-	Safb2	NO	NO
chr13	26253250	26253350	O74	49	-	RP23-201H16.1	NO	NO
chr9	80820150	80820250	O74	48	-	Impg1	NO	NO
chr14	49793650	49793750	O74	48	-	Nat12	NO	NO
chr11	86166850	86166950	O74	47	+	Med13	NO	NO
chr1	125583050	125583150	O74	41	+	Dpp10	NO	NO
chr10	111222550	111222650	O74	39	+	Krr1	NO	NO
chr10	8477950	8478050	O315	7551	-	Sash1	YES	YES
chr10	89764650	89764750	O315	395	+	U6	NO	NO
chr10	100241650	100241750	O315	501	+	1700017N19Rik	NO	NO
chr10	100915750	100915850	O315	1728	+	SNORA17	NO	YES
chr10	115679150	115679250	O315	252	+	Ptprr	NO	NO
chr10	125374050	125374150	O315	44	-	Lrig3	NO	NO
chr10	127868250	127868350	O315	2831	+	Rnf41	NO	YES
chr11	3082050	3082150	O315	1180	+	BADrepeat	NO	NO
chr11	20489350	20489450	O315	380	+	Sertad2	NO	YES
chr11	23287850	23287950	O315	246	+	Usp34	NO	YES
chr11	54253750	54253850	O315	88	+	Fnip1	NO	YES
chr11	57939350	57939450	O315	653	-	Gemin5	NO	NO
chr11	87227350	87227450	O315	150	+	Tex14	NO	NO
chr11	93691150	93691250	O315	170	+	Utp18	NO	NO
chr11	115562650	115562750	O315	1264	-	Grb2	NO	NO
chr12	11606150	11606250	O315	666	+	7SK	NO	NO
chr12	37552950	37553050	O315	8948	+	Ispd	NO	NO
chr12	88510250	88510350	O315	36	+	Tmed8	NO	NO
chr12	113902250	113902350	O315	4558	-	Akt1	YES	YES
chr13	23764250	23764350	O315	746	+	U6	NO	NO
chr13	65291350	65291450	O315	132	-	Nlrp4f	NO	NO
chr13	94216050	94216150	O315	141	+	Jmy	NO	NO
chr14	35264850	35264950	O315	289	-	Bmpr1a	NO	NO
chr14	77308750	77308850	O315	275	-	9030625A04Rik	YES	YES
chr14	87898950	87899050	O315	108	+	Tdrd3	NO	NO
chr14	96991650	96991750	O315	448	-	SNORA30	NO	NO
chr14	102256950	102257050	O315	45	+	Lmo7	NO	NO
chr14	109677650	109677750	O315	561	+	Slitrk1	NO	NO
chr14	109824050	109824150	O315	4729	-	SNORA17	NO	YES
chr16	11801050	11801150	O315	103	-	Cpped1	NO	NO
chr16	17696450	17696550	O315	98	-	Med15	NO	NO
chr16	35349350	35349450	O315	463	+	Sec22a	NO	NO
chr16	50378350	50378450	O315	92	-	Bbx	NO	NO
chr16	58302050	58302150	O315	3620	-	RP24-293N14.2	NO	YES
chr16	75131850	75131950	O315	38	+	Lipi	NO	NO
chr16	92434250	92434350	O315	590	+	Rcan1	NO	NO
chr17	12228550	12228650	O315	165	-	Park2	NO	NO
chr17	17346750	17346850	O315	833	+	Zfp97	NO	NO
chr17	72779650	72779750	O315	329	-	Alk	NO	NO
chr17	84808450	84808550	O315	84	+	Thada	NO	YES
chr18	9388950	9389050	O315	93	+	Ccny	NO	NO
chr18	24019450	24019550	O315	277	-	Mapre2	NO	NO
chr18	43150250	43150350	O315	263	+	Ppp2r2b	YES	YES
chr18	80929550	80929650	O315	234	+	Atp9b	NO	NO
chr18	81359650	81359750	O315	48	+	U6	NO	NO
chr19	20063350	20063450	O315	553	+	SNORA71	NO	NO
chr19	32868150	32868250	O315	5355	+	Pten	YES	YES
chr19	36895350	36895450	O315	39	+	Tnks2	NO	NO
chr19	53885850	53885950	O315	59	-	Rbm20	NO	NO
chr2	21021550	21021650	O315	77	-	RP23-177L19.2	NO	NO
chr2	39054750	39054850	O315	1473	+	Ppp6c	NO	NO
chr2	41697750	41697850	O315	382	-	Lrp1b	NO	NO
chr2	50149850	50149950	O315	28356	+	Mmadhc	NO	YES
chr2	63228750	63228850	O315	38	-	U6	NO	NO
chr2	67300050	67300150	O315	694	-	Xirp2	NO	NO
chr2	69837450	69837550	O315	302	-	Ubr3	NO	NO
chr2	70505850	70505950	O315	92	+	Gorasp2	NO	NO
chr2	106330250	106330350	O315	657	+	RP23-253D15.1	NO	NO
chr2	107402050	107402150	O315	53	+	AL928788.1	NO	NO
chr2	126641550	126641650	O315	123	+	Trpm7	NO	NO
chr2	160434550	160434650	O315	101	+	RP23-152H17.2	NO	NO
chr3	22220350	22220450	O315	784	-	RNaseP_nuc	NO	YES
chr3	32019850	32019950	O315	141	-	Kcnmb2	NO	NO
chr3	70331150	70331250	O315	279	-	AC102373.1	NO	NO
chr3	81926250	81926350	O315	1135	-	Gucy1a3	NO	NO
chr3	96576250	96576350	O315	100	-	Rnf115	NO	NO
chr3	113755550	113755650	O315	99	+	Col11a1	NO	NO
chr3	115411650	115411750	O315	1260	+	S1pr1	NO	YES
chr3	135133350	135133450	O315	207	+	Ube2d3	NO	NO
chr5	30505950	30506050	O315	1734	-	Hadhb	NO	NO
chr5	35485450	35485550	O315	85	+	Lrpap1	NO	NO
chr5	50766350	50766450	O315	442	-	U6	NO	NO
chr5	53018250	53018350	O315	520	-	8030423F21Rik	NO	NO
chr5	53409150	53409250	O315	38	+	Slc34a2	NO	NO
chr5	75542450	75542550	O315	6742	+	Pdgfra	YES	YES
chr5	75557350	75557450	O315	715	+	Pdgfra	YES	YES
chr5	75589750	75589850	O315	14577	-	Pdgfra	YES	YES
chr5	83609850	83609950	O315	23371	+	Tecrl	NO	NO
chr5	90540650	90540750	O315	301	+	Eif5al3	NO	NO
chr5	93609650	93609750	O315	1073	+	Ccni	NO	NO
chr5	121659550	121659650	O315	10618	+	Rpl6	YES	YES
chr5	132258650	132258750	O315	578	+	Auts2	NO	NO
chr5	135093750	135093850	O315	78	-	Eif4h	NO	NO
chr5	136981550	136981650	O315	302	+	Cux1	NO	NO
chr5	142407250	142407350	O315	66	+	Sdk1	NO	NO
chr6	4027650	4027750	O315	60	+	Bet1	NO	NO
chr6	29743050	29743150	O315	997	-	Ahcyl2	NO	NO
chr6	34631850	34631950	O315	168	+	Cald1	NO	NO
chr6	34735950	34736050	O315	402	+	Agbl3	NO	NO
chr6	39091250	39091350	O315	371	+	Jhdm1d	NO	NO
chr6	51475450	51475550	O315	640	+	Snx10	YES	YES
chr6	56288250	56288350	O315	312	+	Pde1c	NO	NO
chr6	85894250	85894350	O315	1153	-	Dusp11	NO	YES
chr6	87945250	87945350	O315	64	-	RP23-226O20.3	NO	NO
chr6	106152250	106152350	O315	304	-	Cntn4	NO	NO
chr6	138267050	138267150	O315	201	+	Lmo3	NO	NO
chr7	56284150	56284250	O315	579	-	Nav2	NO	YES
chr7	87761950	87762050	O315	62	+	Crtc3	NO	NO
chr7	94797650	94797750	O315	1117	-	Grm5	NO	NO
chr7	119510250	119510350	O315	815	-	Micalcl	NO	NO
chr7	137357250	137357350	O315	266	+	Fgfr2	NO	NO
chr7	138715050	138715150	O315	1677	+	Fgfr2	NO	YES
chr7	140269250	140269350	O315	66	+	Fgfr2	NO	NO
chr7	142366750	142366850	O315	138	+	Dock1	NO	NO
chr8	19787850	19787950	O315	1086	-	AC148089.1	NO	NO
[truncated: 225 more rows]

## Sheet: S4-shLMPCR
	Supplemental Table 3
	chr	start	tumor	stop	count	gene	orient	fragment #	lmpcr_support	fusion_support
	chr1	114179650	O235	114179750	1045	SNORA68	+	1	NO	NO
	chr1	116317350	O235	116317450	830	AC122932.1	-	2	NO	NO
	chr1	117604250	O235	117604350	642	Cntnap5a	+	2	NO	NO
	chr1	124095050	O235	124095150	136	AC154871.1	+	2	NO	NO
	chr1	124483550	O235	124483650	2349	SNORA48	-	2	NO	NO
	chr1	130125850	O235	130125950	3115	R3hdm1	-	5	YES	NO
	chr1	130726850	O235	130726950	2076	U6	-	4	NO	NO
	chr1	134699750	O235	134699850	1934	SNORA17	+	2	NO	NO
	chr1	138797350	O235	138797450	850	Nr5a2	+	2	NO	NO
	chr1	138954450	O235	138954550	421	U7	+	2	NO	NO
	chr1	141390950	O235	141391050	1291	Aspm	+	1	NO	NO
	chr1	147236450	O235	147236550	2903	SNORA17	+	3	NO	NO
	chr1	148414550	O235	148414650	955	Fam5c	-	3	NO	NO
	chr1	160623150	O235	160623250	1599	Astn1	-	2	NO	NO
	chr1	168870650	O235	168870750	1877	AC119212.1	+	2	YES	YES
	chr1	168902350	O235	168902450	946	AC119212.1	-	1	YES	YES
	chr1	168975450	O235	168975550	580	Fam78b	-	2	YES	YES
	chr1	179156950	O235	179157050	853	Akt3	+	2	NO	NO
	chr1	188484450	O235	188484550	213	Tgfb2	+	2	NO	NO
	chr1	193037350	O235	193037450	1897	AC115896.3	-	1	NO	NO
	chr1	30345950	O235	30346050	248	AC126798.1	+	1	NO	NO
	chr1	33203850	O235	33203950	223	U6	-	1	NO	NO
	chr1	49764150	O235	49764250	758	C230029F24Rik	+	2	NO	NO
	chr1	51811650	O235	51811750	161	Myo1b	+	2	NO	NO
	chr1	59923450	O235	59923550	3047	Bmpr2	+	4	YES	NO
	chr1	64592150	O235	64592250	336	Creb1	-	2	NO	NO
	chr1	78172250	O235	78172350	115	Pax3	-	3	YES	NO
	chr1	81329350	O235	81329450	191	9430031J16Rik	-	2	NO	NO
	chr1	82866550	O235	82866650	1558	Agfg1	-	3	NO	NO
	chr1	82899550	O235	82899650	584	Agfg1	-	2	NO	NO
	chr1	89321150	O235	89321250	413	Gigyf2	-	2	YES	NO
	chr1	90895250	O235	90895350	2819	Sh3bp4	-	1	NO	NO
	chr10	122015050	O235	122015150	205	Ppm1h	+	2	NO	NO
	chr10	19326450	O235	19326550	2234	Ifngr1	+	3	NO	NO
	chr10	31908150	O235	31908250	750	AC153843.1	+	2	NO	NO
	chr10	46299350	O235	46299450	1770	SNORA17	-	3	NO	NO
	chr10	54532350	O235	54532450	2140	U7	-	3	NO	NO
	chr10	66578650	O235	66578750	15598	Reep3	-	6	NO	YES
	chr10	70533950	O235	70534050	25932	Bicc1	-	10	YES	YES
	chr10	77025050	O235	77025150	227	Itgb2	-	2	NO	NO
	chr10	82242750	O235	82242850	127	Nfyb	-	2	NO	NO
	chr10	85899250	O235	85899350	99	Syn3	-	1	NO	NO
	chr10	94863750	O235	94863850	1137	Socs2	+	3	NO	NO
	chr11	100584650	O235	100584750	153	Rab5c	+	2	NO	NO
	chr11	103048750	O235	103048850	1113	Fmnl1	+	2	NO	NO
	chr11	29277650	O235	29277750	788	Ccdc88a	-	1	NO	NO
	chr11	30094750	O235	30094850	99	Spnb2	-	1	YES	NO
	chr11	30703350	O235	30703450	512	Psme4	-	2	YES	NO
	chr11	4707250	O235	4707350	17459	Nf2	+	9	YES	NO
	chr11	47660650	O235	47660750	1868	Sgcd	-	2	NO	NO
	chr11	50188550	O235	50188650	1224	Hnrnph1	+	3	NO	NO
	chr11	70258750	O235	70258850	418	Arrb2	-	2	NO	NO
	chr11	70773750	O235	70773850	9389	Nup88	-	5	YES	NO
	chr11	88330250	O235	88330350	268	Msi2	-	3	NO	NO
	chr11	97728250	O235	97728350	1060	Fbxo47	-	4	NO	NO
	chr12	100116250	O235	100116350	1588	Eml5	-	2	NO	NO
	chr12	101118950	O235	101119050	3957	2610021K21Rik	+	4	YES	YES
	chr12	104030650	O235	104030750	315	Btbd7	+	2	NO	NO
	chr12	3322850	O235	3322950	546	Rab10	+	1	NO	NO
	chr12	38858650	O235	38858750	201	Dgkb	-	3	NO	NO
	chr12	58875150	O235	58875250	1640	AC123943.1	+	1	NO	NO
	chr12	72249050	O235	72249150	183	2700049A03Rik	+	2	YES	YES
	chr12	73582950	O235	73583050	245	Lrrc9	-	1	NO	NO
	chr12	74346350	O235	74346450	697	Mnat1	-	1	NO	NO
	chr12	8901650	O235	8901750	24017	RP23-344H23.1	-	11	YES	YES
	chr12	93023750	O235	93023850	98	Ston2	-	1	NO	NO
	chr13	10357450	O235	10357550	3460	Chrm3	+	1	NO	NO
	chr13	108666750	O235	108666850	451	Zswim6	+	1	NO	NO
	chr13	112692750	O235	112692850	215	RP23-255E18.2	-	1	NO	NO
	chr13	112746650	O235	112746750	2193	RP23-255E18.3	+	3	NO	NO
	chr13	116666250	O235	116666350	887	Gm10733	+	1	NO	NO
	chr13	12688650	O235	12688750	314	Ero1lb	+	2	NO	NO
	chr13	20552650	O235	20552750	2535	Elmo1	-	3	NO	NO
	chr13	36074050	O235	36074150	581	Lyrm4	+	2	NO	NO
	chr13	45686350	O235	45686450	1165	Atxn1	+	2	NO	NO
	chr13	52092250	O235	52092350	163	CT025557.1	-	2	NO	NO
	chr13	68149350	O235	68149450	410	BC048507	-	1	NO	NO
	chr13	85377850	O235	85377950	437	Rasa1	-	2	NO	NO
	chr14	110119350	O235	110119450	1272	SNORA17	+	2	NO	NO
	chr14	120702550	O235	120702650	621	Mbnl2	+	2	NO	NO
	chr14	17208250	O235	17208350	4699	Top2b	+	2	YES	NO
	chr14	21759950	O235	21760050	2992	Vcl	+	2	NO	NO
	chr14	58308250	O235	58308350	149	Lats2	-	1	YES	NO
	chr14	60854450	O235	60854550	587	Nupl1	-	3	YES	NO
	chr14	63504550	O235	63504650	181	Wdfy2	+	4	NO	NO
	chr15	101973550	O235	101973650	261	Igfbp6	-	1	NO	NO
	chr15	10819750	O235	10819850	152	C1qtnf3	+	2	NO	NO
	chr15	24554750	O235	24554850	98	U1	+	1	NO	NO
	chr15	28959450	O235	28959550	1557	Dnahc5	+	2	NO	NO
	chr15	35299350	O235	35299450	2258	Vps13b	+	2	NO	NO
	chr15	36889950	O235	36890050	8239	Zfp706	+	9	YES	NO
	chr15	58347050	O235	58347150	238	Fer1l6	+	1	NO	NO
	chr15	61815450	O235	61815550	22685	Myc	+	13	YES	YES
	chr15	61923650	O235	61923750	10495	Pvt1	-	6	YES	YES
	chr15	96230350	O235	96230450	1753	Arid2	-	2	NO	NO
	chr16	12354950	O235	12355050	214	Shisa9	-	1	NO	NO
	chr16	14611150	O235	14611250	197	A630010A05Rik	+	1	NO	NO
	chr16	16991250	O235	16991350	542	Mapk1	+	2	NO	NO
	chr16	20519550	O235	20519650	1842	Dvl3	+	3	NO	NO
	chr16	29758450	O235	29758550	2561	9530020O07Rik	-	1	NO	NO
	chr16	31345650	O235	31345750	2650	AC125371.1	+	3	NO	NO
	chr16	31731450	O235	31731550	8310	Dlg1	+	2	YES	YES
	chr16	31764350	O235	31764450	924	Dlg1	+	1	YES	YES
	chr16	31787350	O235	31787450	6613	Dlg1	-	5	YES	YES
	chr16	32024950	O235	32025050	9735	Pak2	+	12	YES	NO
	chr16	37329650	O235	37329750	2630	Stxbp5l	-	2	NO	NO
	chr16	41019650	O235	41019750	915	D930030D11Rik	+	2	NO	NO
	chr16	6185750	O235	6185850	1519	A2bp1	-	3	NO	NO
	chr16	6571850	O235	6571950	110	A2bp1	+	2	NO	NO
	chr16	77706550	O235	77706650	1604	mmu-mir-125b-2	+	4	YES	NO
	chr17	17742850	O235	17742950	1335	Lnpep	+	4	NO	NO
	chr17	29180350	O235	29180450	1317	Sfrs3	-	2	NO	NO
	chr17	30759550	O235	30759650	595	Dnahc8	-	3	NO	NO
	chr17	31778050	O235	31778150	2581	Cbs	-	4	YES	NO
	chr17	38446150	O235	38446250	168	Olfr137	+	2	NO	NO
	chr17	44881250	O235	44881350	490	Runx2	+	2	YES	NO
	chr17	60526850	O235	60526950	483	U1	+	2	NO	NO
	chr17	64663050	O235	64663150	3090	Pja2	+	2	YES	NO
	chr17	68136050	O235	68136150	224	Lama1	+	2	YES	NO
	chr17	68864850	O235	68864950	1776	L3mbtl4	+	2	NO	NO
	chr17	74947450	O235	74947550	11962	Birc6	-	8	YES	YES
	chr17	75663350	O235	75663450	1941	Ltbp1	-	3	YES	NO
	chr17	75664450	O235	75664550	3552	Ltbp1	+	3	YES	NO
	chr17	79428950	O235	79429050	160	Prkd3	+	1	YES	NO
	chr17	83049350	O235	83049450	692	AC166163.1	-	2	NO	NO
	chr17	83792550	O235	83792650	131	Eml4	-	1	NO	NO
	chr18	31522950	O235	31523050	1325	AC161167.3	+	2	NO	NO
	chr18	42497650	O235	42497750	178	Rbm27	+	1	NO	NO
	chr18	5543550	O235	5543650	1622	Gm10125	+	14	NO	NO
	chr18	62044450	O235	62044550	562	Ablim3	-	2	NO	NO
	chr18	73044150	O235	73044250	2008	AC139348.1	+	2	YES	NO
	chr18	80034850	O235	80034950	1445	AC127331.1	-	2	NO	NO
	chr18	8255950	O235	8256050	1772	AC141429.1	+	1	NO	NO
	chr18	9409250	O235	9409350	942	Ccny	+	2	NO	NO
	chr19	34311050	O235	34311150	814	Stambpl1	-	2	NO	NO
	chr19	9754950	O235	9755050	2542	AC124701.1	+	1	NO	NO
	chr2	125085050	O235	125085150	929	Dut	-	2	NO	NO
	chr2	127101150	O235	127101250	303	Stard7	-	2	NO	NO
	chr2	137781150	O235	137781250	3335	RP23-66F6.1	+	5	NO	NO
	chr2	155667850	O235	155667950	2003	Uqcc	+	1	NO	NO
	chr2	156586850	O235	156586950	13763	Dlgap4	-	7	YES	YES
	chr2	160590850	O235	160590950	1271	Zhx3	-	1	YES	NO
	chr2	160615050	O235	160615150	661	Zhx3	+	2	YES	NO
	chr2	165718750	O235	165718850	1705	Zmynd8	-	2	YES	NO
	chr2	18607850	O235	18607950	7002	Bmi1	-	6	YES	NO
	chr2	30478550	O235	30478650	792	RP23-100E9.2	-	3	NO	NO
	chr2	41287950	O235	41288050	100	Lrp1b	+	1	NO	NO
	chr2	58879150	O235	58879250	794	Ccdc148	-	2	NO	NO
	chr2	59960850	O235	59960950	1537	Baz2b	-	2	NO	NO
	chr2	70656250	O235	70656350	6153	Tlk1	+	5	YES	YES
	chr2	80876250	O235	80876350	1519	U6	-	4	NO	NO
	chr2	98506750	O235	98506850	1176	BADrepeat	+	1	NO	NO
	chr3	100197650	O235	100197750	2692	RP23-335A19.1	+	3	NO	NO
	chr3	100764250	O235	100764350	377	Ttf2	-	3	NO	NO
	chr3	101963950	O235	101964050	2996	Vangl1	+	2	NO	NO
	chr3	103225450	O235	103225550	1794	U6	-	4	YES	NO
	chr3	106031550	O235	106031650	152	Chi3l4	+	1	NO	NO
	chr3	115206450	O235	115206550	1455	AC161513.1	+	3	NO	NO
	chr3	121811350	O235	121811450	628	Abca4	+	2	NO	NO
	chr3	123366650	O235	123366750	2484	Ndst3	+	1	NO	NO
	chr3	129187650	O235	129187750	1101	Elovl6	-	2	NO	NO
	chr3	135315950	O235	135316050	3204	Nfkb1	-	2	YES	NO
	chr3	136360550	O235	136360650	1670	Ppp3ca	-	2	NO	NO
	chr3	144358650	O235	144358750	142	Sh3glb1	-	1	NO	NO
	chr3	158014550	O235	158014650	252	Lrrc7	+	1	NO	NO
	chr3	159011150	O235	159011250	215	Depdc1a	-	2	NO	NO
	chr3	16412850	O235	16412950	1402	Ythdf3	+	4	NO	NO
	chr3	29846450	O235	29846550	636	Mecom	-	3	NO	NO
	chr3	31849550	O235	31849650	1499	Kcnmb2	-	3	YES	NO
	chr3	35664750	O235	35664850	324	Atp11b	+	3	NO	NO
	chr3	52972550	O235	52972650	6249	Lhfp	+	3	NO	NO
	chr3	53045150	O235	53045250	2255	Lhfp	+	3	NO	NO
	chr3	61664350	O235	61664450	136	U7	-	2	NO	NO
	chr3	65819850	O235	65819950	856	Veph1	-	2	NO	NO
	chr3	94655950	O235	94656050	10919	Pogz	-	8	YES	YES
	chr3	94656050	O235	94656150	5795	Pogz	-	9	YES	YES
	chr4	132719350	O235	132719450	895	Wasf2	-	6	NO	NO
	chr4	133608150	O235	133608250	181	RP23-314D24.3	+	2	NO	NO
	chr4	136283250	O235	136283350	1104	Ephb2	+	3	NO	NO
	chr4	147213950	O235	147214050	2017	2810408P10Rik	-	1	YES	NO
	chr4	63171550	O235	63171650	125	Whrn	+	3	NO	NO
	chr4	8464450	O235	8464550	132	Rab2a	+	2	NO	NO
	chr4	86619050	O235	86619150	2502	Slc24a2	+	2	NO	NO
	chr4	93906150	O235	93906250	120	RP23-108L1.2	+	2	NO	NO
	chr5	112779750	O235	112779850	17338	Hps4	-	9	YES	YES
	chr5	113211450	O235	113211550	2595	AC122466.1	-	2	NO	NO
	chr5	121513750	O235	121513850	2662	Rph3a	-	3	NO	NO
	chr5	121689350	O235	121689450	112	Gm15800	+	1	YES	NO
	chr5	121737150	O235	121737250	1022	Gm15800	+	2	YES	NO
	chr5	121779950	O235	121780050	6554	Gm15800	+	6	YES	NO
	chr5	121982350	O235	121982450	146	Mapkapk5	-	1	NO	NO
	chr5	14901750	O235	14901850	121	Gm9758	+	1	NO	NO
	chr5	18903850	O235	18903950	2099	Magi2	+	1	NO	NO
	chr5	24821750	O235	24821850	444	Mll3	+	1	YES	NO
	chr5	24891250	O235	24891350	4050	Mll3	-	5	YES	NO
	chr5	24959150	O235	24959250	1485	Mll3	+	3	YES	NO
	chr5	3914650	O235	3914750	1396	Akap9	-	2	NO	NO
	chr5	48064950	O235	48065050	1400	Slit2	+	2	NO	NO
	chr5	48403750	O235	48403850	3916	Slit2	-	2	NO	NO
	chr5	51538450	O235	51538550	1127	AC119939.1	+	3	NO	NO
	chr5	71246850	O235	71246950	169	Gabrg1	-	4	NO	NO
	chr5	71447650	O235	71447750	1751	Gabra2	-	2	NO	NO
	chr5	93514850	O235	93514950	119	2015-09-11	+	2	NO	NO
	chr5	96319450	O235	96319550	896	U6	+	1	NO	NO
	chr5	97809850	O235	97809950	1593	Naa11	-	2	NO	NO
	chr5	98353950	O235	98354050	1532	Antxr2	+	4	YES	NO
	chr6	101779250	O235	101779350	444	Gm9871	-	2	NO	NO
	chr6	120651050	O235	120651150	105	Cecr2	+	2	NO	NO
	chr6	123302150	O235	123302250	838	Clec4e	-	2	NO	NO
	chr6	135518050	O235	135518150	788	SNORA36	-	2	YES	NO
	chr6	136499750	O235	136499850	2657	Atf7ip	+	8	YES	NO
	chr6	139517150	O235	139517250	816	Pik3c2g	+	2	NO	NO
	chr6	147590450	O235	147590550	1494	Ccdc91	-	3	NO	NO
	chr6	19722150	O235	19722250	335	U6	+	3	NO	NO
	chr6	27555350	O235	27555450	1324	Grm8	+	3	NO	NO
	chr6	28191050	O235	28191150	2072	Zfp800	+	5	NO	NO
	chr6	36377550	O235	36377650	801	mmu-mir-490	+	2	NO	NO
	chr6	6594550	O235	6594650	222	Shfm1	-	2	NO	NO
	chr6	68640750	O235	68640850	196	AC120404.3	-	2	NO	NO
	chr6	71383650	O235	71383750	2083	Rmnd5a	+	2	NO	NO
	chr6	9924450	O235	9924550	581	Nxph1	+	2	NO	NO
	chr7	119564950	O235	119565050	243	Parva	-	2	NO	NO
	chr7	123243350	O235	123243450	684	1110004F10Rik	+	2	NO	NO
	chr7	125118150	O235	125118250	441	Rps15a	+	2	NO	NO
	chr7	131962150	O235	131962250	692	AC122882.1	-	2	NO	NO
	chr7	135914750	O235	135914850	1708	Sec23ip	-	2	NO	NO
	chr7	142820450	O235	142820550	577	Ptpre	+	2	NO	NO
	chr7	149572250	O235	149572350	6891	Ctsd	+	2	NO	NO
	chr7	73446850	O235	73446950	343	Lrrk1	-	3	NO	NO
	chr7	99764950	O235	99765050	1306	Ankrd42	-	3	NO	NO
	chr8	110423450	O235	110423550	1334	AC134855.1	-	3	NO	NO
	chr8	117287350	O235	117287450	760	Wwox	+	2	NO	NO
	chr8	119905450	O235	119905550	16977	4933407C03Rik	-	9	YES	NO
	chr8	11994250	O235	11994350	1121	1700018L24Rik	+	4	NO	NO
	chr8	125536650	O235	125536750	1328	Galnt2	-	3	NO	NO
	chr8	129050450	O235	129050550	541	AC118255.1	+	2	NO	NO
	chr8	19944750	O235	19944850	2591	4930467E23Rik	+	4	NO	NO
	chr8	22237150	O235	22237250	472	Gm14851	+	1	NO	NO
	chr8	35960550	O235	35960650	235	Tnks	+	2	NO	NO
	chr8	83125650	O235	83125750	1238	Frem3	-	3	NO	NO
	chr8	85363950	O235	85364050	207	Rnf150	-	5	NO	NO
	chr9	109979550	O235	109979650	369	Mtap4	-	2	NO	NO
	chr9	110409450	O235	110409550	727	Kif9	+	3	NO	NO
	chr9	114757150	O235	114757250	761	Cmtm8	+	2	YES	NO
	chr9	12337250	O235	12337350	2636	AC140222.1	-	2	NO	NO
	chr9	14176450	O235	14176550	1373	Endod1	-	3	NO	NO
	chr9	50372250	O235	50372350	216	Tex12	+	3	NO	NO
	chr9	86549550	O235	86549650	2262	Me1	+	2	NO	NO
	chr9	90944050	O235	90944150	2873	AC152825.1	-	2	NO	NO
	chrX	123128250	O235	123128350	979	RP23-5A21.1	-	2	NO	NO
	chrX	137319850	O235	137319950	1350	Eif2c5	-	1	NO	NO
	chrX	139296950	O235	139297050	450	Ammecr1	+	2	NO	NO
	chrX	161235850	O235	161235950	214	RP23-14C19.1	-	2	NO	NO
	chrX	16695050	O235	16695150	20797	Efhc2	+	7	YES	YES
	chrX	60454350	O235	60454450	3579	RP23-226L1.3	+	4	NO	NO
	chrX	60547050	O235	60547150	486	RP23-269N5.1	+	3	NO	NO
	chrX	71266750	O235	71266850	1567	Irak1	+	3	NO	NO
	chr1	135310450	O245	135310550	3857	Sox13	-	3	YES	YES
	chr1	158266750	O245	158266850	64	Nphs2	+	2	NO	NO
	chr1	173069950	O245	173070050	117	Sdhc	-	1	NO	NO
	chr1	190013350	O245	190013450	1750	Esrrg	-	1	NO	NO
	chr1	24928150	O245	24928250	151	Lmbrd1	-	1	NO	NO
	chr1	25205750	O245	25205850	284	Bai3	-	1	NO	NO
	chr1	40066850	O245	40066950	803	Map4k4	-	3	NO	NO
	chr1	46612450	O245	46612550	310	Dnahc7a	+	1	NO	NO
	chr1	56911450	O245	56911550	4716	Satb2	-	7	YES	YES
	chr1	80316550	O245	80316650	118	Cul3	+	1	YES	YES
	chr1	80335650	O245	80335750	5935	Cul3	+	7	YES	YES
	chr1	89319050	O245	89319150	431	Gigyf2	-	3	YES	NO
	chr1	89825050	O245	89825150	2293	Dgkd	+	3	YES	YES
	chr1	92963750	O245	92963850	3320	Lrrfip1	+	7	YES	YES
	chr10	118395650	O245	118395750	140	Gm10744	+	1	NO	NO
	chr10	128129650	O245	128129750	96	Rab5b	-	1	NO	NO
	chr10	33907950	O245	33908050	42	Dse	-	2	NO	YES
	chr10	39155350	O245	39155450	200	Fyn	+	2	NO	NO
	chr10	63091850	O245	63091950	824	Ctnna3	-	3	NO	NO
	chr10	70595950	O245	70596050	3476	Bicc1	-	5	YES	YES
	chr10	7647250	O245	7647350	528	Map3k7ip2	-	2	YES	NO
	chr11	103116450	O245	103116550	4013	Map3k14	+	3	YES	YES
	chr11	117593950	O245	117594050	2025	Tnrc6c	+	5	YES	YES
	chr11	19212450	O245	19212550	791	RP23-275K20.1	+	3	NO	NO
	chr11	23292850	O245	23292950	949	Usp34	-	4	YES	YES
	chr11	75597850	O245	75597950	908	Doc2b	-	5	YES	YES
	chr11	78494550	O245	78494650	54	Nlk	-	2	NO	NO
	chr11	94156250	O245	94156350	183	Luc7l3	-	2	NO	NO
	chr11	98122550	O245	98122650	4930	Crkrs	-	4	YES	YES
	chr12	105847950	O245	105848050	3184	Dicer1	-	3	YES	YES
	chr12	108200650	O245	108200750	117	RP24-334D12.2	+	2	NO	NO
	chr12	77487550	O245	77487650	593	Zbtb1	-	1	NO	NO
	chr12	97967250	O245	97967350	287	AC159311.1	+	2	NO	NO
	chr13	102533850	O245	102533950	4900	Pik3r1	+	9	YES	YES
	chr13	108569550	O245	108569650	389	Zswim6	+	3	YES	YES
	chr13	14069450	O245	14069550	1082	B3galnt2	-	3	NO	NO
	chr13	29507450	O245	29507550	778	Cdkal1	-	2	NO	NO
	chr13	32359550	O245	32359650	2744	Gmds	-	5	YES	YES
	chr13	33758650	O245	33758750	698	Serpinb6d	+	1	NO	NO
	chr13	40459450	O245	40459550	113	Ofcc1	+	2	NO	NO
	chr13	54950350	O245	54950450	68	RP24-300H23.3	-	2	NO	NO
	chr13	56828350	O245	56828450	836	Smad5	+	1	NO	NO
	chr14	125067150	O245	125067250	44	Fgf14	-	2	NO	NO
	chr14	21569250	O245	21569350	5437	Camk2g	+	7	YES	YES
	chr14	22651650	O245	22651750	1407	Vdac2	-	2	YES	NO
	chr14	27544150	O245	27544250	208	Dnahc7l	-	1	NO	NO
	chr14	58237750	O245	58237850	732	Xpo4	+	2	YES	YES
	chr14	58316450	O245	58316550	1034	Lats2	+	2	YES	YES
	chr14	58329150	O245	58329250	1097	Lats2	+	3	YES	YES
	chr14	61479350	O245	61479450	366	Mipep	+	2	NO	YES
	chr15	18325050	O245	18325150	813	AC122261.1	+	2	NO	NO
	chr15	32333950	O245	32334050	3196	Sema5a	+	4	YES	YES
	chr15	58632850	O245	58632950	88	Tmem65	+	1	NO	NO
	chr15	80859450	O245	80859550	1745	Mkl1	+	5	YES	YES
	chr15	8266150	O245	8266250	88	Nipbl	-	2	NO	NO
	chr16	10297850	O245	10297950	63	Emp2	+	2	YES	YES
	chr16	14316150	O245	14316250	708	0610037P05Rik	+	2	NO	NO
	chr16	30739950	O245	30740050	681	U6	+	2	NO	YES
	chr16	34240750	O245	34240850	3795	Kalrn	-	11	NO	YES
	chr16	38110550	O245	38110650	684	Gsk3b	-	3	NO	NO
	chr16	88887450	O245	88887550	1886	Krtap16-4	-	4	NO	NO
	chr16	92693350	O245	92693450	3269	Runx1	-	5	NO	YES
	chr16	96249350	O245	96249450	3500	Brwd1	-	6	YES	YES
	chr17	29180750	O245	29180850	7015	Sfrs3	+	8	YES	YES
	chr17	41566050	O245	41566150	64	Mut	-	1	NO	NO
	chr17	42957150	O245	42957250	3296	Cd2ap	-	4	YES	YES
	chr17	44712250	O245	44712350	85	Runx2	-	3	NO	NO
	chr17	47774250	O245	47774350	841	Usp49	+	4	YES	YES
	chr17	47833050	O245	47833150	3883	Frs3	+	7	YES	YES
	chr17	56255850	O245	56255950	2063	Plin5	+	2	NO	NO
	chr17	76896550	O245	76896650	344	CT025709.1	-	2	NO	NO
	chr17	8652750	O245	8652850	102	T	-	1	NO	YES
	chr17	88401250	O245	88401350	427	Fbxo11	-	2	YES	YES
	chr17	88410250	O245	88410350	510	Fbxo11	-	3	YES	YES
	chr17	94844850	O245	94844950	387	U6	-	3	NO	NO
	chr18	16668550	O245	16668650	179	Cdh2	-	2	NO	NO
	chr18	24432050	O245	24432150	1082	Galnt1	-	5	NO	NO
	chr18	5962050	O245	5962150	159	Arhgap12	-	1	NO	NO
	chr18	6062350	O245	6062450	350	Arhgap12	+	2	YES	YES
	chr18	6070350	O245	6070450	992	Arhgap12	+	2	YES	YES
	chr18	62705850	O245	62705950	805	Fbxo38	+	3	YES	NO
	chr18	71787250	O245	71787350	122	Dcc	+	1	NO	NO
	chr18	75645950	O245	75646050	254	Gm672	+	2	NO	NO
	chr18	79009550	O245	79009650	277	Setbp1	+	2	NO	NO
	chr18	80557650	O245	80557750	2617	AC145610.2	-	7	YES	YES
	chr18	85833750	O245	85833850	1076	AC144861.1	+	3	NO	NO
	chr18	89176750	O245	89176850	341	Rttn	-	1	NO	NO
	chr18	9431150	O245	9431250	147	Ccny	+	1	NO	YES
	chr18	9439650	O245	9439750	208	Ccny	-	2	NO	YES
	chr19	30218750	O245	30218850	789	Gldc	+	2	NO	NO
	chr19	52334150	O245	52334250	321	Ins1	+	2	NO	NO
	chr19	59417450	O245	59417550	67	Pdzd8	+	3	NO	NO
	chr19	60292450	O245	60292550	1872	D19Ertd737e	+	3	NO	YES
	chr2	119237050	O245	119237150	2629	Ino80	-	4	YES	YES
	chr2	130500650	O245	130500750	112	Itpa	+	2	YES	NO
	chr2	153209950	O245	153210050	161	Asxl1	+	2	NO	NO
	chr2	155023450	O245	155023550	383	Itch	-	2	NO	NO
	chr2	177682850	O245	177682950	451	Gm14325	+	1	YES	NO
	chr2	17994250	O245	17994350	2653	Mllt10	+	12	YES	YES
	chr2	18777150	O245	18777250	836	Pip4k2a	+	2	NO	NO
	chr2	22824150	O245	22824250	357	Abi1	-	2	NO	NO
	chr2	31451350	O245	31451450	82	Fubp3	-	2	NO	NO
	chr2	34682150	O245	34682250	238	Fbxw2	-	2	NO	NO
	chr2	38153850	O245	38153950	122	Dennd1a	-	2	NO	NO
	chr2	43087650	O245	43087750	182	RP23-391P24.1	-	1	NO	NO
	chr2	44931850	O245	44931950	5571	Zeb2	+	5	NO	YES
	chr2	48878850	O245	48878950	579	Mbd5	-	1	NO	NO
	chr2	49691650	O245	49691750	89	Lypd6b	-	2	NO	NO
	chr2	5443350	O245	5443450	239	Camk1d	+	2	NO	NO
	chr2	58403850	O245	58403950	697	Acvr1	-	3	NO	NO
	chr2	59885450	O245	59885550	1074	Baz2b	-	2	NO	NO
	chr2	6390450	O245	6390550	111	RP23-256D19.2	+	2	NO	NO
	chr2	80177050	O245	80177150	1340	Dnajc10	-	1	NO	NO
	chr2	80346350	O245	80346450	1093	Nckap1	+	2	NO	NO
	chr2	91790850	O245	91790950	324	Dgkz	+	2	NO	NO
	chr3	105481050	O245	105481150	948	Ddx20	-	2	NO	NO
	chr3	105756050	O245	105756150	775	Atp5f1	+	2	YES	YES
	chr3	117544250	O245	117544350	9153	Snx7	-	9	NO	YES
	chr3	134250250	O245	134250350	219	AC164408.2	-	1	NO	NO
	chr3	134558350	O245	134558450	129	Tacr3	+	2	NO	NO
	chr3	142539750	O245	142539850	454	Pkn2	-	2	YES	NO
	chr3	144241750	O245	144241850	164	2015-09-15	-	4	NO	NO
	chr3	151554550	O245	151554650	864	U7	+	2	NO	NO
	chr3	157266950	O245	157267050	64	Ptger3	-	1	NO	NO
	chr3	27424550	O245	27424650	3457	Fndc3b	-	5	YES	YES
	chr3	49308350	O245	49308450	506	SNORA66	+	1	NO	NO
	chr3	66781650	O245	66781750	69	Shox2	+	2	NO	NO
	chr4	100853850	O245	100853950	1689	Jak1	+	9	YES	NO
	chr4	108426350	O245	108426450	256	Zfyve9	+	1	NO	NO
	chr4	11173150	O245	11173250	1057	Ints8	-	4	NO	YES
	chr4	130285850	O245	130285950	1744	Pum1	-	5	YES	YES
	chr4	131446550	O245	131446650	118	Sfrs4	-	2	NO	NO
	chr4	134351350	O245	134351450	1204	Tmem57	+	7	YES	YES
	chr4	138820650	O245	138820750	3622	Capzb	+	6	YES	YES
	chr4	149774650	O245	149774750	5363	Rere	-	6	YES	YES
	chr4	41092150	O245	41092250	3784	Ube2r2	+	5	YES	YES
	chr4	62294050	O245	62294150	1020	Rgs3	+	3	YES	NO
	chr4	68489850	O245	68489950	690	Dbc1	+	4	NO	NO
	chr4	70307350	O245	70307450	308	Megf9	-	2	NO	NO
	chr4	82052250	O245	82052350	2180	Nfib	-	4	YES	YES
	chr4	82116550	O245	82116650	3510	Nfib	+	4	YES	YES
	chr4	88924050	O245	88924150	125	Cdkn2a	+	1	YES	NO
	chr5	101654350	O245	101654450	47	Agpat9	-	1	NO	NO
	chr5	110878050	O245	110878150	50	AC169384.1	-	1	YES	YES
	chr5	123239850	O245	123239950	489	Anapc5	-	2	NO	NO
	chr5	134765150	O245	134765250	3290	Gtf2i	+	7	YES	YES
	chr5	146942350	O245	146942450	44	Cyp3a59	-	2	NO	NO
	chr5	151957050	O245	151957150	96	Stard13	+	2	NO	YES
	chr5	33587950	O245	33588050	158	Ctbp1	+	1	NO	NO
	chr5	52555450	O245	52555550	412	Dhx15	+	2	NO	NO
	chr5	65996750	O245	65996850	614	Ube2k	+	5	YES	YES
	chr5	88997350	O245	88997450	331	Rufy3	+	2	YES	NO
	chr6	13597650	O245	13597750	800	AC139884.2	-	3	YES	NO
	chr6	23774350	O245	23774450	452	Cadps2	+	2	NO	NO
	chr6	29327050	O245	29327150	1848	Opn1sw	-	3	NO	NO
	chr6	31167050	O245	31167150	248	AB041803	-	3	NO	NO
	chr6	47445350	O245	47445450	411	Cul1	+	2	NO	NO
	chr6	51831650	O245	51831750	1096	Skap2	+	2	NO	NO
	chr6	72162350	O245	72162450	106	Atoh8	-	6	NO	YES
	chr6	86872550	O245	86872650	6854	Aak1	+	9	NO	YES
	chr7	104480150	O245	104480250	1913	Usp35	+	5	YES	NO
	chr7	128836450	O245	128836550	217	1700069B07Rik	-	2	NO	NO
	chr7	146344050	O245	146344150	1155	Stk32c	-	2	NO	NO
	chr7	17083750	O245	17083850	43	Grlf1	+	1	YES	YES
	chr7	17105950	O245	17106050	129	Grlf1	+	4	YES	YES
	chr7	50932950	O245	50933050	719	Ctu1	+	1	NO	NO
	chr7	66062850	O245	66062950	839	Atp10a	+	3	NO	NO
	chr7	84273650	O245	84273750	357	Agbl1	+	2	NO	NO
	chr8	104949050	O245	104949150	96	AC105256.1	+	2	NO	NO
	chr8	126812150	O245	126812250	906	Galnt2	-	4	YES	YES
	chr8	12837750	O245	12837850	5238	AC134581.1	+	4	NO	YES
	chr8	129110950	O245	129111050	152	AC118255.1	+	2	NO	NO
	chr8	129810350	O245	129810450	691	Pard3	+	2	YES	YES
	chr8	129812250	O245	129812350	562	Pard3	-	4	YES	YES
	chr8	23988950	O245	23989050	612	Myst3	-	5	NO	YES
	chr8	41588950	O245	41589050	2921	Zdhhc2	-	3	YES	YES
	chr8	44544950	O245	44545050	2350	Adam26b	+	3	NO	NO
	chr8	52769850	O245	52769950	67	U1	+	1	NO	NO
	chr8	62376350	O245	62376450	692	U6	+	2	NO	NO
	chr8	68914550	O245	68914650	1564	2015-03-01	-	4	NO	NO
	chr8	72671750	O245	72671850	327	Mef2b	+	1	NO	YES
	chr8	75575250	O245	75575350	108	Large	+	4	NO	NO
	chr8	75735650	O245	75735750	138	Large	+	2	NO	NO
	chr8	98004350	O245	98004450	1520	Csnk2a2	+	4	YES	YES
	chr8	99759150	O245	99759250	45	U6	-	1	NO	NO
	chr9	105001550	O245	105001650	1394	Mrpl3	+	2	NO	NO
	chr9	114663550	O245	114663650	153	Cmtm7	+	1	NO	NO
	chr9	14372150	O245	14372250	1946	Amotl1	-	6	YES	YES
	chr9	21496550	O245	21496650	624	Smarca4	-	2	YES	NO
	chr9	3025450	O245	3025550	579	AC131780.5	-	2	NO	NO
	chr9	32332250	O245	32332350	551	Fli1	+	2	YES	NO
	chr9	37481450	O245	37481550	476	Panx3	-	2	YES	NO
	chr9	44125450	O245	44125550	2226	C2cd2l	+	6	YES	YES
	chr9	44858050	O245	44858150	64	Mpzl2	+	1	NO	NO
	chr9	53626850	O245	53626950	292	Slc35f2	+	2	NO	NO
	chr9	57019150	O245	57019250	1287	Commd4	-	2	NO	NO
	chr9	63466550	O245	63466650	60	Aagab	-	1	NO	NO
	chr9	64750550	O245	64750650	843	Dennd4a	+	1	NO	NO
	chrX	113986750	O245	113986850	262	RP23-325P17.1	-	3	NO	NO
	chrX	136994350	O245	136994450	698	Prps1	+	2	NO	YES
	chrX	139419850	O245	139419950	7884	Ammecr1	+	6	YES	YES
	chrX	141898750	O245	141898850	1006	Amot	+	2	NO	NO
	chrX	160415850	O245	160415950	532	Car5b	-	1	NO	NO
	chrX	17832950	O245	17833050	2226	Kdm6a	-	7	YES	YES
	chrX	37136850	O245	37136950	441	RP23-142A9.2	-	1	NO	NO
	chrX	56527950	O245	56528050	82	Fgf13	+	2	NO	NO
	chr1	104273550	O315	104273650	326	SNORA17	+	2	NO	NO
	chr1	125932250	O315	125932350	3065	Dpp10	-	3	NO	NO
	chr1	136480350	O315	136480450	1312	Kdm5b	+	3	NO	NO
	chr1	157260250	O315	157260350	908	Xpr1	+	3	NO	NO
	chr1	157596350	O315	157596450	1667	Lhx4	-	2	NO	NO
	chr1	163931450	O315	163931550	766	Dnm3	-	2	NO	NO
	chr1	172967650	O315	172967750	672	Fcgr4	-	2	NO	NO
	chr1	174237650	O315	174237750	1632	Igsf8	-	3	NO	YES
	chr1	175235350	O315	175235450	116	Darc	+	2	NO	NO
	chr1	177743350	O315	177743450	110	Wdr64	+	2	NO	NO
	chr1	191673250	O315	191673350	2183	Ptpn14	-	5	NO	NO
	chr1	191703350	O315	191703450	663	Smyd2	-	1	NO	NO
	chr1	193087850	O315	193087950	845	AC115896.3	+	2	NO	NO
	chr1	196866650	O315	196866750	98	Cd46	+	2	NO	NO
	chr1	23077350	O315	23077450	1111	4933415F23Rik	-	2	NO	NO
	chr1	27929150	O315	27929250	472	AC102363.1	+	1	NO	NO
	chr1	30182050	O315	30182150	640	AC126798.1	+	3	NO	NO
	chr1	30878250	O315	30878350	1128	Phf3	-	1	NO	NO
	chr1	31233850	O315	31233950	599	Lgsn	+	2	NO	NO
	chr1	32346750	O315	32346850	108	Khdrbs2	-	2	NO	NO
	chr1	33377950	O315	33378050	831	U6	+	2	NO	NO
	chr1	37467950	O315	37468050	1503	Inpp4a	-	2	NO	NO
	chr1	40048750	O315	40048850	116	Map4k4	+	2	NO	NO
	chr1	40912250	O315	40912350	1750	Tmem182	+	2	NO	NO
	chr1	4850450	O315	4850550	1823	Tcea1	+	3	NO	NO
	chr1	64898350	O315	64898450	2185	Plekhm3	+	2	NO	NO
	chr1	79555150	O315	79555250	143	SNORA17	+	2	NO	NO
	chr1	79708750	O315	79708850	1094	Wdfy1	+	3	NO	NO
	chr1	80305850	O315	80305950	3953	Cul3	+	5	NO	NO
	chr1	82253950	O315	82254050	2024	Irs1	+	2	NO	NO
	chr1	90599250	O315	90599350	19154	Arl4c	-	8	NO	YES
	chr10	100915750	O315	100915850	1831	SNORA17	+	2	YES	NO
	chr10	114864650	O315	114864750	462	Zfc3h1	+	2	NO	NO
	chr10	11950950	O315	11951050	994	AC113936.1	-	4	NO	NO
	chr10	127029450	O315	127029550	215	Lrp1	+	2	NO	NO
	chr10	127868250	O315	127868350	768	Rnf41	+	1	YES	NO
	chr10	19660050	O315	19660150	845	Map3k5	+	2	NO	NO
	chr10	40013150	O315	40013250	3550	Amd2	+	3	NO	NO
	chr10	41241050	O315	41241150	879	Cd164	-	4	NO	NO
	chr10	42414150	O315	42414250	1392	Ostm1	-	2	NO	NO
	chr10	47860450	O315	47860550	115	SNORA25	+	1	NO	NO
	chr10	47902550	O315	47902650	119	SNORA25	-	1	NO	NO
	chr10	52958750	O315	52958850	424	Gm9766	+	2	NO	NO
	chr10	53656750	O315	53656850	1179	Man1a	-	1	NO	NO
	chr10	69580150	O315	69580250	729	Ccdc6	-	2	NO	NO
	chr10	7081250	O315	7081350	615	AC157021.1	+	2	NO	NO
	chr10	74537950	O315	74538050	1462	Bcr	-	2	NO	NO
	chr10	74714850	O315	74714950	1930	Cytsa	+	2	NO	NO
	chr10	8227150	O315	8227250	2297	Ust	-	2	NO	NO
	chr10	8477950	O315	8478050	5750	Sash1	-	8	YES	YES
	chr10	98414550	O315	98414650	1123	Atp2b1	+	3	NO	NO
	chr10	99937750	O315	99937850	1512	Tmtc3	-	1	NO	NO
	chr11	101983250	O315	101983350	110	RP23-398F7.12	-	3	NO	NO
	chr11	110510750	O315	110510850	1876	RP23-206P11.1	+	2	NO	NO
	chr11	120783650	O315	120783750	258	Ccdc57	-	2	NO	NO
	chr11	20397050	O315	20397150	1399	Sertad2	+	3	YES	NO
	chr11	20448550	O315	20448650	343	Sertad2	+	4	YES	NO
	chr11	23287850	O315	23287950	2199	Usp34	+	8	YES	NO
	chr11	23335250	O315	23335350	170	Usp34	-	2	YES	NO
	chr11	23818150	O315	23818250	128	RP23-42P24.3	-	1	NO	NO
	chr11	25144450	O315	25144550	991	SNORA17	+	2	NO	NO
	chr11	29120650	O315	29120750	1604	Smek2	+	1	NO	NO
	chr11	30146450	O315	30146550	1234	Spnb2	-	1	NO	NO
	chr11	32599050	O315	32599150	901	Fbxw11	+	3	NO	NO
	chr11	44540250	O315	44540350	157	Ebf1	+	1	NO	NO
	chr11	4557650	O315	4557750	467	Ascc2	-	3	NO	NO
	chr11	51597850	O315	51597950	315	Sar1b	-	2	NO	NO
	chr11	51683350	O315	51683450	811	Phf15	-	2	NO	NO
	chr11	54253750	O315	54253850	721	Fnip1	+	2	YES	NO
	chr11	54302550	O315	54302650	6788	Fnip1	-	6	YES	NO
	chr11	94557550	O315	94557650	719	Gm11541	+	3	NO	NO
	chr12	113902250	O315	113902350	14479	Akt1	-	8	YES	YES
	chr12	34994250	O315	34994350	735	Hdac9	-	6	NO	NO
	chr12	40529350	O315	40529450	114	SNORA17	-	2	NO	NO
	chr12	46721850	O315	46721950	724	Gm9921	-	2	NO	NO
	chr12	58966850	O315	58966950	832	AC123943.1	-	2	NO	NO
	chr12	77061150	O315	77061250	501	Syne2	+	2	NO	NO
	chr12	99442750	O315	99442850	876	Galc	+	2	NO	NO
	chr13	35902450	O315	35902550	457	Cdyl	+	2	NO	NO
	chr13	83745850	O315	83745950	1354	Mef2c	+	3	NO	NO
	chr14	101971250	O315	101971350	98	Tbc1d4	-	2	NO	NO
	chr14	109824050	O315	109824150	1416	SNORA17	-	2	YES	NO
	chr14	119483350	O315	119483450	226	Uggt2	-	2	NO	NO
	chr14	19099850	O315	19099950	829	Rpl15	+	3	NO	NO
	chr14	19884450	O315	19884550	2729	Ube2e2	+	6	NO	YES
	chr14	22606850	O315	22606950	1094	Samd8	-	1	NO	NO
	chr14	25769150	O315	25769250	201	RP24-141G14.1	+	1	NO	NO
	chr14	34203750	O315	34203850	154	Mapk8	+	1	NO	NO
	chr14	36899350	O315	36899450	2311	AC166822.1	-	3	NO	NO
	chr14	48361450	O315	48361550	1174	Ktn1	+	2	NO	NO
	chr14	77308750	O315	77308850	9747	9030625A04Rik	-	6	YES	YES
	chr14	82845150	O315	82845250	212	snR78	-	2	NO	NO
	chr15	20130750	O315	20130850	633	SNORA17	+	2	NO	NO
	chr15	30562950	O315	30563050	461	Ctnnd2	+	2	NO	NO
	chr15	3205750	O315	3205850	184	Sepp1	+	2	NO	NO
	chr15	4049550	O315	4049650	186	Oxct1	-	1	NO	NO
	chr15	52940650	O315	52940750	1045	Ext1	-	2	NO	NO
	chr15	58701250	O315	58701350	691	Trmt12	+	3	NO	NO
	chr15	60432550	O315	60432650	513	SNORA17	-	2	NO	NO
	chr15	62219150	O315	62219250	145	Pvt1	-	1	NO	NO
	chr15	68628350	O315	68628450	95	AC155317.1	+	2	NO	NO
	chr15	70024250	O315	70024350	575	SNORA79	+	1	NO	NO
	chr15	75649550	O315	75649650	161	Zc3h3	-	3	NO	YES
	chr15	78838850	O315	78838950	7618	Gm10865	+	9	NO	NO
	chr15	8289550	O315	8289650	3055	Nipbl	-	2	NO	NO
	chr15	96112750	O315	96112850	586	AC109202.1	-	2	NO	NO
	chr16	17104750	O315	17104850	1106	Ppil2	-	1	NO	NO
	chr16	24911750	O315	24911850	1761	Lpp	-	1	NO	NO
	chr16	32429750	O315	32429850	182	Tctex1d2	+	2	NO	NO
	chr16	32934650	O315	32934750	104	Lrch3	-	3	NO	NO
	chr16	58302050	O315	58302150	8971	RP24-293N14.2	-	7	YES	NO
	chr16	6793750	O315	6793850	1312	A2bp1	+	1	NO	NO
	chr16	70921650	O315	70921750	406	U7	-	2	NO	NO
	chr16	82299350	O315	82299450	1336	U6	-	1	NO	NO
	chr16	94851350	O315	94851450	403	Dyrk1a	-	2	NO	NO
	chr17	10440550	O315	10440650	1354	Qk	-	2	NO	NO
	chr17	11550650	O315	11550750	585	Park2	+	2	NO	NO
	chr17	26113650	O315	26113750	1107	Solh	+	3	NO	NO
	chr17	30207850	O315	30207950	1265	Zfand3	-	3	NO	NO
	chr17	33910650	O315	33910750	394	Angptl4	-	3	NO	NO
	chr17	34086450	O315	34086550	239	Wdr46	-	1	NO	NO
	chr17	46744050	O315	46744150	801	CT030702.2	+	2	NO	NO
	chr17	61661550	O315	61661650	2291	AC126448.1	-	3	NO	NO
	chr17	78442050	O315	78442150	2315	Crim1	+	2	NO	NO
	chr17	84808450	O315	84808550	1432	Thada	+	2	YES	NO
	chr18	29462250	O315	29462350	1259	Pik3c3	-	3	NO	NO
	chr18	33935850	O315	33935950	677	AC150277.2	-	2	NO	NO
	chr18	34738450	O315	34738550	639	Nme5	-	3	NO	NO
	chr18	35949850	O315	35949950	219	Cxxc5	-	1	NO	NO
	chr18	43150250	O315	43150350	2720	Ppp2r2b	+	4	YES	YES
	chr18	46782450	O315	46782550	555	Eif1a	-	3	NO	NO
	chr18	68171550	O315	68171650	203	D18Ertd653e	-	2	NO	NO
	chr19	27921350	O315	27921450	341	Rfx3	-	2	NO	NO
	chr19	32868150	O315	32868250	13791	Pten	+	9	YES	YES
	chr19	37892550	O315	37892650	98	Myof	+	2	NO	NO
	chr19	49533750	O315	49533850	670	AC108421.1	-	2	NO	NO
	chr2	110017650	O315	110017750	2566	Ccdc34	+	3	NO	NO
	chr2	116970150	O315	116970250	1102	Spred1	-	2	NO	NO
	chr2	128440850	O315	128440950	1131	Anapc1	-	2	NO	NO
	chr2	135018150	O315	135018250	356	Plcb1	+	3	NO	NO
	chr2	162188050	O315	162188150	1634	Ptprt	-	3	NO	NO
	chr2	18281850	O315	18281950	2162	Dnajc1	+	3	NO	NO
	chr2	21518050	O315	21518150	193	Gpr158	+	2	NO	NO
	chr2	24983450	O315	24983550	1200	RP23-132N23.1	+	2	NO	NO
	chr2	3101650	O315	3101750	962	Fam171a1	+	3	NO	NO
	chr2	4536950	O315	4537050	115	Frmd4a	+	2	NO	NO
	chr2	50149850	O315	50149950	2446	Mmadhc	+	5	YES	NO
	chr2	52290450	O315	52290550	1249	Cacnb4	-	3	NO	NO
	chr2	58099950	O315	58100050	2145	Acvr1c	+	3	NO	NO
	chr2	59470850	O315	59470950	372	Tanc1	-	1	NO	NO
	chr2	59622250	O315	59622350	3296	Tanc1	-	5	NO	NO
	chr2	69996750	O315	69996850	113	Myo3b	-	2	NO	NO
	chr2	73226650	O315	73226750	154	RP23-463K8.7	-	2	NO	NO
	chr2	8278450	O315	8278550	1166	7SK	+	2	NO	NO
	chr2	85348850	O315	85348950	1194	4833423E24Rik	-	1	NO	NO
	chr2	90710350	O315	90710450	119	Mtch2	+	1	NO	NO
	chr3	108506850	O315	108506950	152	Gpsm2	-	2	NO	NO
	chr3	115411650	O315	115411750	4767	S1pr1	+	6	YES	NO
	chr3	122124450	O315	122124550	1614	Bcar3	-	2	NO	NO
	chr3	125467250	O315	125467350	864	Ndst4	-	2	NO	NO
	chr3	138701350	O315	138701450	185	Rap1gds1	-	2	NO	NO
	chr3	144990250	O315	144990350	1517	Col24a1	-	4	NO	NO
	chr3	22220350	O315	22220450	1186	RNaseP_nuc	-	3	YES	NO
	chr3	27470550	O315	27470650	906	Fndc3b	-	2	NO	NO
	chr3	65109250	O315	65109350	2278	Kcnab1	-	1	NO	NO
	chr3	69538750	O315	69538850	1055	Nmd3	-	3	NO	NO
	chr3	71482750	O315	71482850	481	AC105155.1	-	3	NO	NO
	chr3	78980350	O315	78980450	221	Rapgef2	-	1	NO	NO
	chr3	86578150	O315	86578250	722	Lrba	+	2	NO	NO
	chr4	100483550	O315	100483650	101	Cachd1	-	2	NO	NO
	chr4	109538650	O315	109538750	152	Faf1	-	2	NO	NO
	chr4	111457850	O315	111457950	296	Spata6	+	2	NO	NO
	chr4	120851350	O315	120851450	567	Rlf	-	2	NO	NO
	chr4	126606950	O315	126607050	1197	Zmym4	+	2	NO	NO
	chr4	132634150	O315	132634250	824	Ahdc1	+	2	NO	NO
	chr4	133692150	O315	133692250	1434	Ccdc21	-	2	NO	NO
	chr4	135576250	O315	135576350	301	Tceb3	-	2	NO	NO
	chr4	136061450	O315	136061550	610	Luzp1	-	2	NO	NO
	chr4	136343050	O315	136343150	166	Ephb2	-	1	NO	NO
	chr4	137209750	O315	137209850	444	Usp48	+	2	NO	NO
	chr4	137281250	O315	137281350	1555	Rap1gap	+	4	NO	NO
	chr4	137644850	O315	137644950	122	Eif4g3	+	2	NO	YES
	chr4	137648650	O315	137648750	11326	Eif4g3	+	10	NO	YES
	chr4	137655750	O315	137655850	301	Eif4g3	-	2	NO	YES
	chr4	138772650	O315	138772750	10189	Capzb	+	6	NO	YES
	chr4	138791850	O315	138791950	259	Capzb	+	2	NO	YES
	chr4	142702550	O315	142702650	2971	Prdm2	-	5	NO	NO
	chr4	153827550	O315	153827650	6615	Prdm16	-	4	NO	NO
	chr4	17826650	O315	17826750	128	Mmp16	+	1	NO	NO
	chr4	20332650	O315	20332750	1881	Nkain3	-	1	NO	NO
	chr4	20685750	O315	20685850	349	Nkain3	+	2	NO	NO
	chr4	38274850	O315	38274950	476	RP23-320I1.3	-	2	NO	NO
	chr4	43604450	O315	43604550	1101	RP23-191F22.5	-	4	NO	YES
	chr4	50661350	O315	50661450	2264	SNORA17	+	1	NO	NO
	chr4	55391250	O315	55391350	11745	Rad23b	-	8	NO	NO
	chr4	62993750	O315	62993850	144	Col27a1	+	2	NO	NO
	chr4	66666550	O315	66666650	2371	Tlr4	+	3	NO	NO
	chr4	72725250	O315	72725350	814	RP23-377B9.2	+	5	NO	NO
	chr4	75968450	O315	75968550	14218	Ptprd	-	7	NO	NO
	chr4	75975950	O315	75976050	335	Ptprd	-	2	NO	NO
	chr4	7779350	O315	7779450	6757	SNORA17	-	4	NO	NO
	chr4	79197550	O315	79197650	7563	RP23-57L17.1	-	4	NO	NO
	chr5	106830350	O315	106830450	308	Barhl2	-	2	NO	NO
	chr5	108702550	O315	108702650	236	Dr1	+	2	NO	NO
	chr5	115133550	O315	115133650	828	Gltp	+	2	NO	NO
	chr5	121659550	O315	121659650	5770	Rpl6	+	5	YES	YES
	chr5	124125750	O315	124125850	1417	Clip1	+	2	NO	NO
	chr5	137117650	O315	137117750	97	4731417B20Rik	-	2	NO	NO
	chr5	144428150	O315	144428250	1588	Cyth3	+	2	NO	NO
	chr5	150659450	O315	150659550	1476	B3galtl	+	3	NO	NO
	chr5	151918350	O315	151918450	965	Stard13	+	2	NO	NO
	chr5	31547450	O315	31547550	968	Nrbp1	-	2	NO	NO
	chr5	32799750	O315	32799850	805	Ppp1cb	-	4	NO	NO
	chr5	40991250	O315	40991350	142	U2	-	2	NO	NO
	chr5	47159650	O315	47159750	1817	AC117724.1	+	4	NO	NO
	chr5	51010250	O315	51010350	2178	U6	+	1	NO	NO
	chr5	59461650	O315	59461750	1543	U6	+	6	NO	NO
	chr5	71116550	O315	71116650	348	Gabrg1	+	1	NO	NO
	chr5	75542450	O315	75542550	5035	Pdgfra	+	6	YES	YES
	chr5	75547850	O315	75547950	1148	Pdgfra	+	2	YES	YES
	chr5	75589750	O315	75589850	29679	Pdgfra	-	14	YES	YES
	chr5	77146950	O315	77147050	98	C530008M17Rik	+	2	NO	NO
	chr6	113271250	O315	113271350	453	RP23-103G18.5	-	1	NO	NO
	chr6	130045550	O315	130045650	371	Klra9	-	2	NO	NO
	chr6	137688450	O315	137688550	2123	Strap	-	3	NO	NO
	chr6	147271350	O315	147271450	171	RP24-249N9.5	+	2	NO	NO
	chr6	26248650	O315	26248750	243	U1	+	3	NO	NO
	chr6	35267150	O315	35267250	101	Fam180a	-	2	NO	NO
	chr6	38399650	O315	38399750	417	Ubn2	+	7	NO	NO
	chr6	51475450	O315	51475550	3897	Snx10	+	5	YES	YES
	chr6	52488250	O315	52488350	758	Hibadh	-	4	NO	NO
	chr6	57513450	O315	57513550	908	Herc5	+	2	NO	NO
	chr6	60649950	O315	60650050	129	Snca	+	2	NO	NO
	chr6	83893850	O315	83893950	1498	Zfml	+	4	NO	NO
	chr6	85323350	O315	85323450	915	Rab11fip5	+	2	NO	NO
	chr6	85600250	O315	85600350	493	Alms1	-	2	NO	NO
	chr6	85894250	O315	85894350	4166	Dusp11	-	5	YES	NO
	chr7	105848550	O315	105848650	1980	AC111124.2	-	3	NO	NO
	chr7	109304850	O315	109304950	141	Nup98	+	1	NO	NO
	chr7	116287450	O315	116287550	1692	Lmo1	-	3	NO	NO
	chr7	120097950	O315	120098050	781	AC104930.1	-	2	NO	NO
	chr7	130118850	O315	130118950	2331	Rbbp6	+	3	NO	NO
	chr7	131884850	O315	131884950	1345	AC122882.1	-	3	NO	NO
	chr7	132430850	O315	132430950	1872	4930533L02Rik	-	3	NO	NO
	chr7	138715050	O315	138715150	4750	Fgfr2	+	7	YES	NO
	chr7	140003850	O315	140003950	2080	Fgfr2	-	1	NO	NO
	chr7	140599250	O315	140599350	219	4930404H21Rik	-	2	NO	NO
	chr7	149086050	O315	149086150	4109	Tollip	-	2	NO	NO
	chr7	52816750	O315	52816850	584	Hsd17b14	-	3	NO	NO
	chr7	56284150	O315	56284250	602	Nav2	-	3	YES	NO
	chr7	92473750	O315	92473850	531	AC101719.1	+	1	NO	NO
	chr8	104976250	O315	104976350	1330	AC105256.1	-	2	NO	NO
	chr8	105289850	O315	105289950	2730	Cdh11	+	3	NO	NO
	chr8	105622650	O315	105622750	1589	AC141641.1	+	2	NO	NO
	chr8	116365450	O315	116365550	828	Adamts18	+	2	NO	NO
	chr8	118817350	O315	118817450	96	U7	+	2	NO	NO
	chr8	126789150	O315	126789250	248	Galnt2	-	3	NO	NO
	chr8	62831350	O315	62831450	99	Gm10283	-	2	NO	NO
	chr8	68411750	O315	68411850	1336	2015-03-01	-	1	NO	NO
	chr8	74943150	O315	74943250	2763	Calr3	-	2	NO	NO
	chr8	82779250	O315	82779350	1783	AC163438.1	+	3	NO	NO
	chr8	8688250	O315	8688350	159	Arglu1	+	2	NO	NO
	chr8	90215550	O315	90215650	473	Zfp423	-	2	NO	NO
	chr9	112299750	O315	112299850	2346	RP23-152P11.2	-	4	NO	NO
	chr9	113659050	O315	113659150	276	Clasp2	-	2	NO	NO
	chr9	12462750	O315	12462850	706	AC140222.1	-	2	NO	NO
	chr9	26232850	O315	26232950	384	B3gat1	-	2	NO	NO
	chr9	3697450	O315	3697550	132	Gucy1a2	+	2	NO	NO
	chr9	45951650	O315	45951750	93	Sik3	-	2	NO	NO
	chr9	70539950	O315	70540050	468	Adam10	-	2	YES	NO
	chr9	71785850	O315	71785950	4840	Tcf12	+	5	YES	NO
	chr9	72138250	O315	72138350	752	Zfp280d	+	2	NO	NO
	chr9	89989650	O315	89989750	6728	Morf4l1	+	6	NO	NO
	chrX	107552650	O315	107552750	98	RP23-204I23.2	-	4	NO	NO
	chrX	107876750	O315	107876850	1209	U2	+	3	NO	NO
	chrX	108018050	O315	108018150	386	Pou3f4	+	1	NO	NO
	chrX	118533850	O315	118533950	879	RP23-244I22.1	+	2	NO	NO
	chrX	120042950	O315	120043050	2960	RP23-119F1.1	-	2	NO	NO
	chrX	129847550	O315	129847650	515	7SK	-	3	NO	NO
	chrX	132158050	O315	132158150	328	Prame	-	2	NO	NO
	chrX	141894950	O315	141895050	464	Amot	+	2	NO	NO
	chrX	14243450	O315	14243550	704	RP23-400A17.1	-	2	NO	NO
	chrX	148497750	O315	148497850	1609	Smc1a	-	3	NO	YES
	chrX	150337550	O315	150337650	1180	U6	-	1	NO	NO
	chrX	151379150	O315	151379250	911	Magea3	-	2	NO	NO
	chrX	154700350	O315	154700450	3760	RP23-194K1.3	+	3	NO	NO
	chrX	155426550	O315	155426650	329	RP23-206E1.1	+	2	NO	NO
	chrX	157321350	O315	157321450	1102	Cdkl5	+	3	NO	NO
	chrX	160797450	O315	160797550	2557	Pir	-	3	NO	NO
	chrX	16329850	O315	16329950	465	Maob	-	2	NO	NO
	chrX	35018250	O315	35018350	2057	Rhox4f	+	3	NO	NO
	chrX	49472650	O315	49472750	1298	Gpc4	-	2	NO	NO
	chrX	53351150	O315	53351250	1959	mmu-mir-1194	-	4	NO	NO
	chrX	55256550	O315	55256650	766	U6	-	2	NO	NO
	chrX	71545250	O315	71545350	108	Atp6ap1	-	2	NO	NO
	chrX	74856850	O315	74856950	200	Tbl1x	-	3	NO	NO
	chrX	98798750	O315	98798850	143	Taf1	-	1	NO	NO
	chr1	129770550	O374-1	129770650	1180	Rab3gap1	-	2	NO	NO
	chr1	17957350	O374-1	17957450	1268	Crisp4	+	2	NO	NO
	chr1	36786650	O374-1	36786750	992	Actr1b	-	3	NO	NO
	chr1	37050650	O374-1	37050750	3764	5S_rRNA	-	3	NO	NO
	chr1	37509950	O374-1	37510050	2138	Mgat4a	-	2	NO	NO
	chr1	88409750	O374-1	88409850	254	Ptma	-	2	NO	NO
	chr10	125133050	O374-1	125133150	590	Lrig3	+	2	NO	NO
	chr10	39401950	O374-1	39402050	1220	RP24-271F24.2	-	2	NO	NO
	chr10	60767550	O374-1	60767650	29166	Prf1	+	13	YES	YES
	chr10	63577150	O374-1	63577250	1117	Ctnna3	-	1	NO	NO
	chr10	93344550	O374-1	93344650	295	Metap2	-	2	NO	NO
	chr11	10051150	O374-1	10051250	1246	RP23-138G17.1	-	2	NO	NO
	chr11	33138450	O374-1	33138550	401	Ranbp17	+	2	NO	NO
	chr11	72073250	O374-1	72073350	100	Slc13a5	-	1	NO	NO
	chr11	89671050	O374-1	89671150	198	Ankfn1	-	2	NO	NO
	chr11	96924250	O374-1	96924350	2535	Osbpl7	+	3	NO	NO
	chr13	22603050	O374-1	22603150	842	V1ri7	-	1	NO	NO
	chr13	49217150	O374-1	49217250	822	Wnk2	+	2	NO	NO
	chr13	8246450	O374-1	8246550	1716	Adarb2	+	2	NO	NO
	chr13	94436050	O374-1	94436150	217	Bhmt2	+	2	NO	NO
	chr14	11263250	O374-1	11263350	1416	Fhit	+	3	NO	NO
	chr14	115815950	O374-1	115816050	175	Gpc5	-	1	NO	NO
	chr15	101968550	O374-1	101968650	18584	Spryd3	-	10	NO	YES
	chr15	12234650	O374-1	12234750	1824	Golph3	-	4	NO	NO
	chr15	12402350	O374-1	12402450	18498	Pdzd2	-	10	NO	YES
	chr15	12859250	O374-1	12859350	381	Rnasen	-	2	NO	YES
	chr15	13245550	O374-1	13245650	842	Cdh6	+	2	NO	NO
	chr15	13252950	O374-1	13253050	14819	Cdh6	+	7	NO	NO
	chr15	13668350	O374-1	13668450	3126	Cdh6	-	3	NO	NO
	chr15	13788750	O374-1	13788850	2002	Cdh6	-	4	NO	NO
	chr15	14415750	O374-1	14415850	241	AC165279.1	+	2	NO	NO
	chr15	14490950	O374-1	14491050	110	AC165279.1	-	5	NO	NO
	chr15	14720850	O374-1	14720950	13610	AC165279.1	+	6	NO	NO
	chr15	14757850	O374-1	14757950	151	AC165279.1	+	2	NO	NO
	chr15	14902350	O374-1	14902450	845	AC165279.1	-	2	NO	NO
	chr15	15089250	O374-1	15089350	1264	AC165279.1	+	2	NO	NO
	chr15	23711450	O374-1	23711550	1489	U1	-	2	NO	NO
	chr15	23713350	O374-1	23713450	2330	U1	-	5	NO	NO
	chr15	23713950	O374-1	23714050	1167	U1	+	3	NO	NO
	chr15	23760350	O374-1	23760450	375	U1	+	1	NO	NO
	chr15	26396550	O374-1	26396650	456	2015-03-11	-	6	NO	NO
	chr15	30038150	O374-1	30038250	493	SNORA73	-	2	NO	NO
	chr15	32022950	O374-1	32023050	55847	Tas2r119	+	15	NO	YES
	chr15	32227350	O374-1	32227450	67248	Sema5a	-	11	NO	YES
	chr15	33115650	O374-1	33115750	12856	Pgcp	+	10	NO	NO
	chr15	3381050	O374-1	3381150	519	Ghr	+	2	NO	NO
	chr15	34603950	O374-1	34604050	419	Nipal2	+	2	NO	NO
	chr15	3584650	O374-1	3584750	693	U6atac	-	3	NO	NO
	chr15	37451250	O374-1	37451350	1891	Ncald	+	4	NO	NO
	chr15	38817850	O374-1	38817950	116	Fzd6	+	2	NO	NO
	chr15	39442350	O374-1	39442450	533	Rims2	-	4	NO	NO
	chr15	4508350	O374-1	4508450	293	Plcxd3	+	2	NO	NO
	chr15	4678350	O374-1	4678450	11119	C6	+	8	NO	NO
	chr15	61784950	O374-1	61785050	63594	Myc	-	12	NO	YES
	chr15	61816650	O374-1	61816750	32257	Myc	+	17	NO	YES
	chr15	62637050	O374-1	62637150	10253	SNORA17	-	3	NO	YES
	chr16	17328250	O374-1	17328350	2168	Pi4ka	-	3	NO	NO
	chr16	27506450	O374-1	27506550	281	Ccdc50	+	2	NO	NO
	chr16	34487050	O374-1	34487150	94	Kalrn	+	1	NO	NO
	chr16	43826950	O374-1	43827050	2605	Drd3	+	2	NO	NO
	chr16	56663150	O374-1	56663250	269	Abi3bp	+	3	NO	NO
	chr16	64497250	O374-1	64497350	408	Csnka2ip	+	2	NO	NO
	chr16	6727950	O374-1	6728050	1618	A2bp1	+	3	NO	NO
	chr16	85803750	O374-1	85803850	544	Adamts1	+	2	NO	NO
	chr17	31969650	O374-1	31969750	634	Sik1	-	3	NO	NO
	chr18	14065850	O374-1	14065950	4041	Zfp521	-	3	NO	NO
	chr18	34617450	O374-1	34617550	20364	Fam13b	+	13	YES	YES
	chr18	42957650	O374-1	42957750	1178	Ppp2r2b	+	2	NO	NO
	chr18	52594650	O374-1	52594750	609	Srfbp1	+	2	NO	NO
	chr18	73816550	O374-1	73816650	980	Smad4	-	4	NO	NO
	chr19	20079050	O374-1	20079150	121	SNORA71	+	2	NO	NO
	chr19	6915450	O374-1	6915550	584	Rps6ka4	+	2	NO	NO
	chr2	137346250	O374-1	137346350	10001	RP23-327A15.1	+	5	YES	NO
	chr2	140098750	O374-1	140098850	222	Sel1l2	-	1	NO	NO
	chr2	149722650	O374-1	149722750	690	Tmem90b	+	1	NO	NO
	chr2	159654250	O374-1	159654350	423	RP23-190L21.2	-	2	NO	NO
	chr2	179306350	O374-1	179306450	1124	Cdh4	-	2	NO	NO
	chr2	33655450	O374-1	33655550	811	Fam125b	-	2	NO	NO
	chr2	44460950	O374-1	44461050	3329	Gtdc1	-	4	NO	NO
	chr2	46919850	O374-1	46919950	844	U7	-	2	NO	NO
	chr2	60591250	O374-1	60591350	122	Rbms1	-	2	NO	NO
	chr2	72059150	O374-1	72059250	2020	Rapgef4	+	2	NO	NO
	chr2	83485650	O374-1	83485750	414	Zc3h15	+	2	NO	NO
	chr2	84589750	O374-1	84589850	1227	mmu-mir-130a	+	1	NO	NO
	chr2	84849350	O374-1	84849450	33946	P2rx3	+	6	YES	NO
	chr2	98506550	O374-1	98506650	97	BADrepeat	-	1	NO	NO
	chr3	100376850	O374-1	100376950	2302	Man1a2	+	3	NO	NO
	chr3	131853550	O374-1	131853650	1872	Dkk2	-	3	NO	NO
	chr3	35522950	O374-1	35523050	925	U6	-	2	NO	NO
	chr3	35786750	O374-1	35786850	486	Dcun1d1	+	2	NO	NO
	chr3	72165250	O374-1	72165350	179	U2	+	2	NO	NO
	chr4	107631950	O374-1	107632050	148	RP23-40G2.5	-	2	NO	NO
	chr4	20501450	O374-1	20501550	454	Nkain3	-	2	NO	NO
	chr4	27573350	O374-1	27573450	1933	U6	+	1	NO	NO
	chr4	28989350	O374-1	28989450	755	RP23-200B23.3	-	2	NO	NO
	chr4	32866050	O374-1	32866150	390	Mdn1	+	3	NO	NO
	chr4	50522050	O374-1	50522150	166	SNORA17	-	2	NO	NO
	chr4	58818150	O374-1	58818250	1867	AI314180	-	3	NO	YES
	chr4	58859550	O374-1	58859650	6452	AI314180	-	8	NO	YES
	chr4	59277250	O374-1	59277350	743	RP23-57N22.5	-	2	NO	NO
	chr4	61464850	O374-1	61464950	1239	RP23-235J15.12	+	3	NO	NO
	chr4	77495450	O374-1	77495550	790	Ptprd	-	4	NO	NO
	chr4	89642750	O374-1	89642850	596	RP23-258D11.1	-	3	NO	NO
	chr5	150561450	O374-1	150561550	1632	B3galtl	+	2	NO	NO
	chr5	30475750	O374-1	30475850	37592	Hadha	-	13	YES	YES
	chr5	33987650	O374-1	33987750	117	Slbp	+	1	YES	YES
	chr5	43906250	O374-1	43906350	916	C1qtnf7	-	2	NO	NO
	chr5	44571950	O374-1	44572050	2410	Tapt1	-	5	NO	NO
	chr6	126505750	O374-1	126505850	2327	Kcna5	+	4	NO	NO
	chr6	38558350	O374-1	38558450	1030	Luc7l2	-	2	NO	NO
	chr6	78281650	O374-1	78281750	2060	Reg3b	+	4	NO	NO
	chr6	84095350	O374-1	84095450	363	Dysf	+	2	NO	YES
	chr7	126000950	O374-1	126001050	2451	Iqck	-	2	YES	YES
	chr7	137310450	O374-1	137310550	21526	Fgfr2	-	9	YES	YES
	chr7	78364950	O374-1	78365050	111	AC131983.1	-	3	NO	NO
	chr7	87413850	O374-1	87413950	2034	Vps33b	+	2	NO	NO
	chr8	10364550	O374-1	10364650	3216	Myo16	-	1	NO	NO
	chr8	130171550	O374-1	130171650	621	Pard3	-	3	NO	NO
	chr8	8332950	O374-1	8333050	94	Efnb2	-	3	NO	NO
	chr8	9397350	O374-1	9397450	889	Fam155a	-	2	NO	NO
	chr9	17099950	O374-1	17100050	1187	U7	-	3	NO	NO
	chr9	37479350	O374-1	37479450	30442	Panx3	-	11	YES	YES
	chr9	68848350	O374-1	68848450	463	Rora	-	3	NO	NO
	chr9	78311950	O374-1	78312050	22071	Mto1	+	10	YES	YES
	chr9	91589050	O374-1	91589150	576	U6	-	3	NO	NO
	chrX	139917550	O374-1	139917650	569	Pak3	-	1	NO	NO
	chrX	22839250	O374-1	22839350	1745	Klhl13	+	3	NO	NO
	chr1	11072050	O380	11072150	164	Prex2	-	1	NO	NO
	chr1	114226050	O380	114226150	2935	SNORA68	+	4	NO	NO
	chr1	117914350	O380	117914450	4006	Cntnap5a	+	3	NO	NO
	chr1	130435050	O380	130435150	744	U6	-	2	NO	NO
	chr1	133222150	O380	133222250	12567	Srgap2	-	6	NO	YES
	chr1	136554250	O380	136554350	281	Syt2	+	2	NO	NO
	chr1	139232850	O380	139232950	4045	SNORA17	-	2	NO	NO
	chr1	143356650	O380	143356750	613	Y_RNA	+	2	NO	NO
	chr1	143507350	O380	143507450	136	Y_RNA	+	2	NO	NO
	chr1	152179250	O380	152179350	300	Pdc	+	1	NO	NO
	chr1	157410950	O380	157411050	1248	Acbd6	+	2	NO	NO
	chr1	159582950	O380	159583050	3369	AC161108.1	-	3	NO	NO
	chr1	181514650	O380	181514750	1082	Cnst	+	2	NO	NO
	chr1	18184650	O380	18184750	3383	Defb44	-	2	NO	NO
	chr1	191737750	O380	191737850	12010	Smyd2	-	6	NO	NO
	chr1	27017050	O380	27017150	155	5S_rRNA	-	2	NO	NO
	chr1	29886750	O380	29886850	2912	AC126798.1	+	3	NO	NO
	chr1	44674050	O380	44674150	4507	Gulp1	+	3	NO	NO
	chr1	44767450	O380	44767550	6956	Gulp1	-	3	NO	NO
	chr1	44799750	O380	44799850	1162	Gulp1	+	2	NO	NO
	chr1	64538550	O380	64538650	616	Creb1	-	3	NO	NO
	chr1	69030650	O380	69030750	2150	Erbb4	+	3	NO	NO
	chr10	105802150	O380	105802250	3570	Ppfia2	-	1	NO	NO
	chr10	108387050	O380	108387150	2573	Syt1	-	2	NO	NO
	chr10	108432550	O380	108432650	1241	Syt1	-	2	NO	NO
	chr10	115997550	O380	115997650	415	Cnot2	-	2	NO	NO
	chr10	12235150	O380	12235250	393	Utrn	+	3	NO	NO
	chr10	122411850	O380	122411950	1174	mmu-let-7i	-	2	NO	NO
	chr10	122488150	O380	122488250	5781	Mon2	+	3	NO	NO
	chr10	15223050	O380	15223150	749	AC157019.1	+	3	NO	NO
	chr10	27015050	O380	27015150	904	Lama2	-	2	NO	NO
	chr10	36868550	O380	36868650	507	5930403N24Rik	+	1	NO	NO
	chr10	40777950	O380	40778050	2854	Gpr6	-	2	NO	NO
	chr10	40892950	O380	40893050	1138	Fig4	+	2	NO	NO
	chr10	56531550	O380	56531650	609	Gm9956	-	1	NO	NO
	chr10	92950950	O380	92951050	1542	Hal	-	2	NO	NO
	chr10	98413150	O380	98413250	2839	Atp2b1	+	2	NO	NO
	chr11	101569650	O380	101569750	216	Dhx8	+	1	NO	NO
	chr11	101892050	O380	101892150	157	RP23-398F7.6	-	2	NO	NO
	chr11	104388750	O380	104388850	1509	Cdc27	+	2	NO	NO
	chr11	104425350	O380	104425450	2732	Myl4	-	1	NO	NO
	chr11	21161650	O380	21161750	1564	Vps54	+	2	NO	NO
	chr11	4717250	O380	4717350	31721	Nf2	+	14	YES	YES
	chr11	56415850	O380	56415950	3584	SNORA70	-	2	NO	NO
	chr11	70235650	O380	70235750	2875	RP23-42P20.5	+	4	NO	NO
	chr11	79831150	O380	79831250	15371	Suz12	+	6	NO	NO
	chr11	80352950	O380	80353050	1398	Myo1d	+	3	NO	NO
	chr11	90133050	O380	90133150	491	Mmd	+	2	NO	NO
	chr12	27810950	O380	27811050	1338	Gm9866	-	2	NO	NO
	chr12	50674150	O380	50674250	1032	SNORA17	-	2	NO	NO
	chr12	7336550	O380	7336650	91	AC124134.1	+	1	NO	NO
	chr13	104854450	O380	104854550	3814	Nln	-	3	NO	NO
	chr13	23648650	O380	23648750	262	Hist1h1d	+	1	NO	NO
	chr13	7238050	O380	7238150	2978	CT010465.1	+	1	NO	NO
	chr13	99285850	O380	99285950	121	AC130536.1	+	3	NO	NO
	chr14	11080050	O380	11080150	368	Fhit	-	2	NO	NO
	chr14	22556450	O380	22556550	2988	Dusp13	+	2	YES	NO
	chr14	24250350	O380	24250450	3988	Kcnma1	-	4	NO	NO
	chr14	66979050	O380	66979150	1262	Stmn4	+	2	NO	NO
	chr14	69548150	O380	69548250	2621	Stc1	+	2	NO	NO
	chr14	73665450	O380	73665550	3931	Rb1	-	2	NO	NO
	chr14	99539450	O380	99539550	986	Pibf1	+	3	NO	NO
	chr15	101092250	O380	101092350	2572	Nr4a1	-	3	NO	NO
	chr15	102351950	O380	102352050	17869	Tarbp2	-	7	NO	YES
	chr15	14479250	O380	14479350	853	AC165279.1	+	2	NO	NO
	chr15	44542850	O380	44542950	423	5730410E15Rik	+	2	NO	NO
	chr15	47151250	O380	47151350	1449	Csmd3	+	12	NO	NO
	chr15	49821750	O380	49821850	1576	U6	-	2	NO	NO
	chr15	53472850	O380	53472950	24147	Samd12	-	9	NO	NO
	chr15	78558250	O380	78558350	2695	Elfn2	+	2	NO	NO
	chr15	80866650	O380	80866750	1684	Mkl1	-	3	NO	NO
	chr15	80932050	O380	80932150	2281	Mkl1	-	3	NO	NO
	chr15	9129850	O380	9129950	2378	Lmbrd2	+	3	NO	NO
	chr15	93806650	O380	93806750	22168	Adamts20	+	5	NO	NO
	chr16	24785250	O380	24785350	3048	Lpp	+	3	NO	NO
	chr16	31195450	O380	31195550	696	Acap2	+	2	NO	NO
	chr16	32281650	O380	32281750	96	Rnf168	+	1	NO	NO
	chr16	38106050	O380	38106150	235	Gsk3b	+	2	NO	NO
	chr16	45642050	O380	45642150	2904	BC016579	-	2	NO	NO
	chr16	49640350	O380	49640450	174	Ift57	+	2	NO	NO
	chr16	53467150	O380	53467250	181	SNORA32	-	2	NO	NO
	chr16	60409950	O380	60410050	192	Epha6	+	3	NO	NO
	chr16	96265250	O380	96265350	18276	Brwd1	-	8	YES	NO
	chr16	96266850	O380	96266950	2326	Brwd1	+	4	YES	NO
	chr16	9912950	O380	9913050	978	Grin2a	-	2	NO	NO
	chr17	17751850	O380	17751950	517	Lnpep	-	2	NO	NO
	chr17	19585750	O380	19585850	1425	Fpr-rs7	+	2	NO	NO
	chr17	36133550	O380	36133650	5511	H2-T24	-	6	NO	NO
	chr17	36133650	O380	36133750	2769	H2-T24	-	6	NO	NO
	chr17	56843950	O380	56844050	1426	Ranbp3	+	2	NO	NO
	chr17	69964550	O380	69964650	2882	7SK	+	4	NO	NO
	chr17	91982850	O380	91982950	3267	RP23-222O19.1	-	2	NO	NO
	chr18	40336150	O380	40336250	4586	Yipf5	-	4	NO	NO
	chr18	56736350	O380	56736450	1377	Phax	-	3	NO	NO
	chr18	76210350	O380	76210450	5248	Zbtb7c	-	3	NO	NO
	chr19	32875150	O380	32875250	7599	Pten	-	5	YES	NO
	chr2	101613550	O380	101613650	2121	Prr5l	+	2	NO	NO
	chr2	154352850	O380	154352950	2996	Cbfa2t2	-	6	NO	NO
	chr2	23492850	O380	23492950	5244	Sh3d2c-ps1	+	2	NO	NO
	chr2	34173350	O380	34173450	3458	Pbx3	+	3	NO	NO
	chr2	47504450	O380	47504550	4745	RP23-103G12.1	-	2	NO	NO
	chr2	50084650	O380	50084750	3401	Lypd6	-	1	NO	NO
	chr2	72094550	O380	72094650	2818	Rapgef4	-	4	NO	NO
	chr2	98502650	O380	98502750	4895	BADrepeat	-	3	YES	NO
	chr2	98507350	O380	98507450	1442	BADrepeat	+	3	YES	NO
	chr3	134270550	O380	134270650	673	AC164408.2	-	5	NO	NO
	chr3	142022650	O380	142022750	2238	Pdlim5	+	1	NO	NO
	chr3	142100950	O380	142101050	3039	Pdlim5	+	2	NO	NO
	chr3	151163650	O380	151163750	163	Eltd1	+	2	NO	NO
	chr3	155701850	O380	155701950	2475	U6	-	1	NO	NO
	chr3	156288450	O380	156288550	1040	Negr1	+	4	YES	NO
	chr3	49437850	O380	49437950	244	U6	+	2	NO	NO
	chr3	58403950	O380	58404050	580	2810407C02Rik	-	1	NO	NO
	chr3	59479650	O380	59479750	6107	4930449A18Rik	+	3	NO	NO
	chr3	65571850	O380	65571950	1673	Lekr1	+	1	NO	NO
	chr4	10042650	O380	10042750	2579	RP23-131A6.5	-	2	NO	NO
	chr4	107955250	O380	107955350	1223	Zyg11b	-	4	NO	NO
	chr4	148189950	O380	148190050	1103	Casz1	+	3	NO	NO
	chr4	149504250	O380	149504350	569	Slc2a5	-	2	NO	NO
	chr4	151828650	O380	151828750	2364	Kcnab2	+	2	NO	NO
	chr4	32824350	O380	32824450	1810	Mdn1	-	2	NO	NO
	chr4	40900850	O380	40900950	459	Chmp5	-	2	NO	NO
	chr4	59090550	O380	59090650	2108	AI481877	-	2	NO	NO
	chr4	89571750	O380	89571850	667	Dmrta1	-	3	NO	NO
	chr5	113553850	O380	113553950	10712	2900026A02Rik	+	11	YES	YES
	chr5	114588450	O380	114588550	2207	Ung	-	4	NO	NO
	chr5	115779650	O380	115779750	18297	Sfrs9	-	12	NO	YES
	chr5	129529750	O380	129529850	6507	Ran	-	4	YES	NO
	chr5	16039350	O380	16039450	770	Hgf	+	2	NO	NO
	chr5	16854050	O380	16854150	2081	Speer4f	-	1	NO	NO
	chr5	67683650	O380	67683750	170	Tmem33	-	2	NO	NO
	chr5	85173650	O380	85173750	249	Epha5	-	1	NO	NO
	chr6	107963350	O380	107963450	1145	Setmar	-	3	NO	NO
	chr6	111443050	O380	111443150	3777	Grm7	+	4	NO	NO
	chr6	118597450	O380	118597550	8092	Cacna1c	+	3	NO	NO
	chr6	129393950	O380	129394050	313	Clec1a	+	1	NO	NO
	chr6	136065750	O380	136065850	319	Grin2b	+	2	NO	NO
	chr6	31681450	O380	31681550	1157	RP24-414G20.1	+	2	NO	NO
	chr6	52671350	O380	52671450	4274	Tax1bp1	-	3	NO	NO
	chr6	94691150	O380	94691250	1776	Lrig1	-	4	NO	NO
	chr7	107997750	O380	107997850	983	Relt	+	1	NO	NO
	chr7	115670050	O380	115670150	708	Olfr502	-	2	NO	NO
	chr7	125628850	O380	125628950	8345	Itpripl2	-	9	YES	NO
	chr7	132095650	O380	132095750	2168	AC122882.1	+	2	NO	NO
	chr7	143231650	O380	143231750	87	AC147124.1	-	2	NO	NO
	chr7	150911550	O380	150911650	2082	Osbpl5	+	2	NO	NO
	chr7	61036750	O380	61036850	3768	AC127338.1	-	3	YES	NO
	chr8	101752150	O380	101752250	993	Cdh8	+	3	NO	NO
	chr8	12868350	O380	12868450	2231	AC134581.1	+	2	NO	NO
	chr8	130887050	O380	130887150	639	Nrp1	-	2	NO	NO
	chr8	19662450	O380	19662550	956	AC148089.1	-	2	NO	NO
	chr8	22688950	O380	22689050	133	AC133094.10	+	1	NO	NO
	chr8	24830050	O380	24830150	554	Zmat4	-	3	NO	NO
	chr8	26108650	O380	26108750	2244	Adam9	+	6	YES	YES
	chr8	26335350	O380	26335450	1421	Tacc1	-	1	NO	NO
	chr8	51424050	O380	51424150	6573	AC125181.1	+	3	NO	NO
	chr8	62025450	O380	62025550	1400	U6	+	1	NO	NO
	chr8	62440650	O380	62440750	1814	U6	-	2	NO	NO
	chr8	87280150	O380	87280250	524	Nfix	+	2	NO	NO
	chr8	89779250	O380	89779350	1624	Gm10637	+	4	NO	NO
	chr9	109869350	O380	109869450	366	Mtap4	-	2	NO	NO
	chr9	11270850	O380	11270950	2045	CT009748.1	+	2	NO	NO
	chr9	3024650	O380	3024750	361	AC131780.5	-	2	YES	NO
	chr9	30315350	O380	30315450	129	Snx19	+	4	NO	NO
	chr9	37125450	O380	37125550	5033	Ccdc15	+	5	NO	NO
	chr9	38968350	O380	38968450	2672	Olfr27	+	3	NO	NO
	chr9	4920850	O380	4920950	2196	Gria4	-	3	NO	NO
	chr9	50773650	O380	50773750	2401	Sik2	+	3	NO	NO
	chr9	5083550	O380	5083650	2554	SNORA16	+	4	NO	NO
	chr9	58445250	O380	58445350	1088	Nptn	-	2	YES	YES
	chr9	58483650	O380	58483750	27903	Nptn	-	8	YES	YES
	chr9	9593350	O380	9593450	840	Cntn5	+	4	NO	NO
	chrX	121283750	O380	121283850	4585	Vmn2r121	-	1	NO	NO
	chrX	142975950	O380	142976050	2288	RP23-273I8.1	-	1	NO	NO
	chrX	61520950	O380	61521050	1976	Slitrk4	+	2	NO	NO
	chrX	72783050	O380	72783150	1681	Vbp1	-	3	NO	NO
	chrX	91780850	O380	91780950	2143	Maged1	+	2	NO	NO
	chrX	92629850	O380	92629950	6098	Fam123b	-	5	NO	NO
	chrY	2898650	O380	2898750	345	BADrepeat	+	2	NO	NO
	chr1	108460050	O82	108460150	2934	Bcl2	+	3	NO	NO
	chr1	151714950	O82	151715050	114	Pla2g4a	+	2	NO	NO
	chr1	155909150	O82	155909250	414	SNORA17	-	2	NO	NO
	chr1	190360850	O82	190360950	434	Ush2a	+	3	NO	NO
	chr1	193365950	O82	193366050	3895	Dtl	+	7	NO	YES
	chr1	30456250	O82	30456350	431	Gm9898	-	2	NO	NO
	chr1	32529650	O82	32529750	550	Khdrbs2	+	2	NO	NO
	chr1	4020950	O82	4021050	4610	U7	+	1	NO	NO
	chr1	56847050	O82	56847150	2910	Satb2	+	3	NO	NO
	chr1	61558450	O82	61558550	2341	U6	-	3	NO	NO
	chr1	71555150	O82	71555250	1963	Atic	+	3	NO	NO
	chr1	78456250	O82	78456350	523	Farsb	-	2	NO	NO
	chr1	85095650	O82	85095750	2487	Csprs	+	2	NO	NO
	chr1	93642550	O82	93642650	2871	Twist2	-	2	NO	NO
	chr1	95467350	O82	95467450	491	Farp2	+	2	NO	NO
	chr10	104891550	O82	104891650	1395	Tmtc2	+	1	NO	NO
	chr10	111086850	O82	111086950	25216	AC158595.1	+	7	YES	NO
	chr10	62401950	O82	62402050	1123	Slc25a16	-	2	NO	NO
	chr11	119966150	O82	119966250	924	Slc38a10	-	2	NO	NO
	chr11	5191750	O82	5191850	123	Znrf3	+	1	NO	NO
	chr11	53594250	O82	53594350	925	Irf1	-	20	YES	YES
	chr11	74762250	O82	74762350	7381	Smg6	+	2	NO	NO
	chr12	115341550	O82	115341650	114	Adam6a	+	2	NO	NO
	chr12	22808350	O82	22808450	239	AC122327.1	-	2	NO	NO
	chr12	25661550	O82	25661650	215	Kidins220	-	2	NO	NO
	chr12	33655950	O82	33656050	6388	Sypl	-	5	YES	NO
	chr12	46810850	O82	46810950	294	Gm9921	-	2	NO	NO
	chr12	58870550	O82	58870650	293	AC123943.1	+	1	NO	NO
	chr12	61425750	O82	61425850	1887	U6	+	3	NO	NO
	chr12	66778550	O82	66778650	4777	SNORA17	-	1	NO	NO
	chr12	78050950	O82	78051050	1482	Max	-	2	NO	NO
	chr12	80803350	O82	80803450	1093	Rad51l1	+	4	NO	NO
	chr12	80803950	O82	80804050	3129	Rad51l1	+	2	NO	NO
	chr12	81578450	O82	81578550	408	Exd2	+	2	NO	NO
	chr12	8732750	O82	8732850	1139	Pum2	-	4	NO	NO
	chr13	10457550	O82	10457650	1259	CT571267.1	-	3	NO	NO
	chr14	102436450	O82	102436550	1308	Lmo7	-	2	NO	NO
	chr14	99336150	O82	99336250	321	AC155252.1	-	4	NO	NO
	chr15	44598250	O82	44598350	16768	5730410E15Rik	+	10	NO	YES
	chr15	45520550	O82	45520650	515	U6	+	2	NO	NO
	chr15	49452350	O82	49452450	1367	U6	-	3	NO	NO
	chr15	61486050	O82	61486150	1358	Pvt1	-	3	NO	NO
	chr15	62978650	O82	62978750	2908	AC132141.1	+	2	NO	NO
	chr15	63936950	O82	63937050	4380	Asap1	-	9	NO	YES
	chr15	63937050	O82	63937150	5801	Asap1	-	8	NO	YES
	chr15	6958750	O82	6958850	1358	Gm10050	-	3	NO	NO
	chr15	8659450	O82	8659550	1042	Slc1a3	-	1	NO	NO
	chr15	92180850	O82	92180950	3019	AC125460.1	-	2	NO	NO
	chr16	24618850	O82	24618950	898	Lpp	+	2	NO	NO
	chr16	34525150	O82	34525250	1271	Kalrn	+	2	NO	NO
	chr16	38188850	O82	38188950	2016	Gsk3b	+	3	NO	NO
	chr16	47013950	O82	47014050	312	RP23-266E12.1	+	2	NO	NO
	chr16	82809050	O82	82809150	2314	U6	+	2	NO	NO
	chr16	85250650	O82	85250750	5393	App	+	3	NO	NO
	chr17	17684450	O82	17684550	1049	Lnpep	+	2	NO	NO
	chr17	40094550	O82	40094650	2254	AC188608.1	-	4	NO	NO
	chr17	46940350	O82	46940450	1766	CT030702.2	-	2	NO	NO
	chr17	60045450	O82	60045550	2160	U6	+	1	NO	NO
	chr17	67329050	O82	67329150	6595	Ptprm	-	5	YES	NO
	chr17	78005350	O82	78005450	1772	Crim1	-	3	NO	NO
	chr17	79730850	O82	79730950	553	Cdc42ep3	-	2	NO	NO
	chr17	8602850	O82	8602950	1174	T2	-	3	NO	NO
	chr17	91402150	O82	91402250	5216	Nrxn1	+	2	NO	NO
	chr18	32100850	O82	32100950	21600	Lims2	-	8	YES	YES
	chr18	55403250	O82	55403350	21756	U6	-	7	YES	NO
	chr18	6048150	O82	6048250	3083	Arhgap12	+	4	YES	YES
	chr18	6211450	O82	6211550	11322	Kif5b	-	6	YES	YES
	chr18	62209550	O82	62209650	120	Sh3tc2	-	1	NO	NO
	chr2	140080850	O82	140080950	522	Sel1l2	+	2	NO	NO
	chr2	147776550	O82	147776650	745	RP23-207P16.1	-	4	NO	NO
	chr2	26491950	O82	26492050	896	Fam69b	-	2	NO	NO
	chr2	34276950	O82	34277050	11986	Mapkap1	+	8	NO	NO
	chr2	98507250	O82	98507350	499	BADrepeat	+	2	NO	NO
	chr3	107632450	O82	107632550	949	Eps8l3	-	4	YES	NO
	chr3	122169350	O82	122169450	4207	Bcar3	+	6	YES	YES
	chr3	127341950	O82	127342050	587	Neurog2	+	4	NO	NO
	chr3	139241750	O82	139241850	1780	B930007M17Rik	+	2	NO	NO
	chr3	15800950	O82	15801050	1777	Gm5150	+	1	NO	NO
	chr3	5248650	O82	5248750	6312	Zfhx4	-	7	YES	YES
	chr3	70998450	O82	70998550	1723	AC105155.1	-	1	NO	NO
	chr3	82774750	O82	82774850	3188	AC158935.2	+	2	NO	NO
	chr3	88496550	O82	88496650	2971	2810403A07Rik	-	3	NO	NO
	chr4	136859450	O82	136859550	4453	Wnt4	+	3	NO	NO
	chr4	141275850	O82	141275950	169	Rsc1a1	+	2	NO	NO
	chr4	155392250	O82	155392350	159	Tnfrsf4	-	1	NO	NO
	chr4	18050550	O82	18050650	1433	Mmp16	-	3	NO	NO
	chr4	24724250	O82	24724350	1467	Klhl32	+	3	NO	NO
	chr4	33179750	O82	33179850	4878	Gabrr2	-	2	NO	NO
	chr4	40109250	O82	40109350	277	Aco1	+	2	NO	NO
	chr4	66138650	O82	66138750	235	SNORA67	-	2	NO	NO
	chr4	69954950	O82	69955050	194	Cdk5rap2	-	3	NO	NO
	chr4	98703650	O82	98703750	642	Dock7	-	2	NO	NO
	chr5	115184350	O82	115184450	229	Git2	+	2	NO	NO
	chr5	12129850	O82	12129950	498	Sema3d	+	2	NO	NO
	chr5	30254550	O82	30254650	581	Gm10469	-	2	NO	NO
	chr5	38261150	O82	38261250	99	Msx1	+	2	NO	NO
	chr5	74417450	O82	74417550	1623	Usp46	-	4	NO	NO
	chr5	74953450	O82	74953550	483	Fip1l1	+	3	NO	NO
	chr5	79968750	O82	79968850	79	7SK	+	2	NO	NO
	chr6	12111650	O82	12111750	1928	U7	+	4	NO	NO
	chr6	31450950	O82	31451050	1539	Mkln1	-	2	NO	NO
	chr6	3487850	O82	3487950	1601	Ccdc132	-	2	NO	NO
	chr6	3777550	O82	3777650	1013	Calcr	+	2	NO	NO
	chr6	6332850	O82	6332950	1265	Slc25a13	+	2	NO	NO
	chr6	88597750	O82	88597850	328	Klhdc6	+	2	NO	NO
	chr6	9727850	O82	9727950	109	Nxph1	+	2	NO	NO
	chr7	135598650	O82	135598750	12556	Tial1	+	10	YES	YES
	chr7	151655050	O82	151655150	3747	Cttn	-	1	NO	NO
	chr8	10847050	O82	10847150	27769	AC116499.1	+	9	YES	YES
	chr8	13782950	O82	13783050	30803	Cdc16	-	12	YES	NO
	chr8	26114450	O82	26114550	1589	Adam9	+	2	NO	NO
	chr8	4067450	O82	4067550	470	RP23-279E21.1	-	2	NO	NO
	chr8	59277450	O82	59277550	2418	Fbxo8	-	2	NO	NO
	chr8	63474150	O82	63474250	3687	Nek1	-	7	YES	NO
	chr8	73391050	O82	73391150	1114	Ccdc124	+	3	NO	NO
	chr8	8232650	O82	8232750	251	Efnb2	+	1	NO	NO
	chr8	85505850	O82	85505950	5302	Rnf150	+	4	NO	NO
	chr9	107714650	O82	107714750	716	Rbm6	-	2	NO	NO
	chr9	121858250	O82	121858350	1975	Fam198a	+	2	NO	NO
	chr9	18442150	O82	18442250	2915	U6	-	4	NO	NO
	chr9	25883050	O82	25883150	153	AC141438.1	-	2	NO	NO
	chr9	26795050	O82	26795150	1721	Acad8	-	3	NO	NO
	chr9	30655050	O82	30655150	1769	Adamts15	+	2	NO	NO
	chr9	3227950	O82	3228050	3186	AC140318.1	-	2	NO	NO
	chr9	44477250	O82	44477350	666	Treh	+	1	YES	NO
	chr9	44560650	O82	44560750	2365	Arcn1	-	3	YES	NO
	chr9	44680750	O82	44680850	1320	Mll1	+	2	NO	NO
	chr9	45880450	O82	45880550	17594	Sik3	+	7	YES	YES
	chr9	54738950	O82	54739050	2023	Ireb2	-	2	NO	NO
	chr9	56233050	O82	56233150	1294	C230081A13Rik	+	1	NO	NO
	chr9	62203150	O82	62203250	20366	Anp32a	-	8	YES	YES
	chr9	8985350	O82	8985450	590	9030420J04Rik	+	2	NO	NO
	chrX	148658450	O82	148658550	818	Iqsec2	+	4	NO	NO
	chrX	17859150	O82	17859250	5195	Kdm6a	-	5	YES	NO

## Sheet: S5-dCIS
	Supplemental Table 4
#library	pos	#library	pvaluelibrary#	gene_name	library_name
3	chr11:4717250-4724250	3	0.000101306	Nf2,	::O380::O417::O165::
5	chr19:32851250-32907250	5	6.7081e-06	Pten,	::O31::O315::O380::O74::O417::
2	chr15:34023150-34030150	2	0.0467301	Mtdh,	::O74::O165::
3	chr4:88923450-88930450	3	0.000101306	Cdkn2a, RP23-166I8.4,	::O74::O245::O31::
2	chr7:74436850-74443850	2	0.0467301	Mef2a,	::O109::O74::
3	chrX:7503550-7510550	3	0.000101306	Pcsk1n, Eras, Hdac6, Gm10490, Psmb6-ps, Timm17b, AL670169.1,	::O167::O73::O31::
4	chr18:31989050-32159050	4	0.0492454	Sft2d3, Lims2, Gpr17, Wdr33, Myo7b,	::O73::O417::O245::O82::
2	chr13:51841250-51848250	2	0.0467301	Sema4d,	::O31::O74::
2	chr11:115557250-115564250	2	0.0467301	Grb2,	::O109::O315::
2	chr11:53591050-53598050	2	0.0467301	Irf1, RP23-303F24.3, AL596182.1,	::O167::O82::
2	chr11:23287850-23294850	2	0.0467301	Usp34,	::O315::O245::
2	chr1:89319050-89326050	2	0.0467301	Gigyf2, U6,	::O245::O235::
2	chr14:26344750-26351750	2	0.0467301	Zmiz1,	::O112::O245::
2	chr2:35049450-35056450	2	0.0467301	Rab14, Cep110,	::O165::O82::
2	chr2:39054750-39061750	2	0.0467301	Ppp6c, Scai, RP23-446O17.4,	::O315::O165::
2	chr2:119230350-119237350	2	0.0467301	Ino80,	::O74::O245::
2	chr2:124437750-124444750	2	0.0467301	Sema6d,	::O245::O112::
2	chr3:116353950-116360950	2	0.0467301	Hiat1, Slc35a3,	::O31::O165::
2	chr4:41089850-41096850	2	0.0467301	Ube2r2, RP24-162K15.2, Nol6, RP24-162K15.3,	::O165::O245::
2	chr4:53151450-53158450	2	0.0467301	Abca1,	::O167::O109::
2	chr4:122669450-122676450	2	0.0467301	Mycl1, Trit1,	::O112::O31::
2	chr4:149770950-149777950	2	0.0467301	Rere,	::O112::O245::
2	chr5:34357650-34364650	2	0.0467301	Poln, Nat8l,	::O165::O112::
2	chr6:119979150-119986150	2	0.0467301	Hsn2, mmu-mir-706,	::O74::O73::
2	chr7:125628850-125635850	2	0.0467301	Itpripl2, AC122912.1, Coq7,	::O380::O245::
2	chr8:90681150-90688150	2	0.0467301	Heatr3, 9430002A10Rik, AC126034.1,	::O165::O112::
2	chr8:115505850-115512850	2	0.0467301	No results within 20000 bp window	::O82::O109::
2	chr9:37479350-37486350	2	0.0467301	Panx3, Tbrg1, AC160125.1,	::O374-1::O245::
2	chr9:64687950-64694950	2	0.0467301	Dennd4a,	::O109::O417::
2	chr9:121649150-121656150	2	0.0467301	Nktr, AC165080.2,	::O82::O235::
2	chrX:139419850-139426850	2	0.0467301	Ammecr1,	::O245::O112::
4	chr8:83338750-83508750	4	0.0492454	Usp38, Gab1,	::O109::O74::O112::O73::
3	chr17:42938150-42994150	3	0.0495601	Cd2ap,	::O31::O245::O82::
3	chr10:104908250-104964250	3	0.0495601	Tmtc2, RP23-363J15.1, RP24-380E10.1,	::O165::O73::O112::
3	chrX:17832950-17888950	3	0.0495601	5S_rRNA, Kdm6a,	::O245::O315::O82::

## Sheet: S6-rCIS
Supplemental Table 5
pos	#library	pvaluelibrary#	#regions	pvalueregion#	gene_name	library_name
chr4:122666550-122675550	2	0.0414219	7	2.37936e-16	Mycl1, Trit1,	::O112::O167::
chr8:41584650-41593650	2	0.0414219	6	2.4515e-13	Zdhhc2, Cnot7, Vps37a,	::O245::O31::
chr4:11166450-11175450	3	9.38069e-05	6	2.4515e-13	Ints8, Dpy19l4,	::O112::O245::O31::
chr17:42952950-42961950	2	0.0414219	6	2.4515e-13	Cd2ap,	::O245::O31::
chr8:90680550-90689550	2	0.0414219	6	2.4515e-13	Heatr3, 9430002A10Rik, AC126034.1,	::O165::O112::
chrX:7497750-7506750	3	9.38069e-05	6	2.4515e-13	Eras, Hdac6, Pcsk1n, Gm10490, Timm17b, AL670169.1,	::O167::O31::O73::
chr7:137307450-137316450	2	0.0414219	5	2.165e-10	Fgfr2,	::O374-1::O74::
chr5:134764950-134773950	2	0.0414219	4	1.59331e-07	Gtf2i,	::O245::O31::
chr4:149768550-149777550	2	0.0414219	4	1.59331e-07	Rere,	::O112::O245::
chr4:88939950-88948950	2	0.0414219	4	1.59331e-07	Cdkn2a, Cdkn2b,	::O74::O73::
chr4:88922550-88931550	3	9.38069e-05	4	1.59331e-07	Cdkn2a, RP23-166I8.4,	::O73::O31::O74::
chr10:66576750-66585750	2	0.0414219	4	1.59331e-07	Reep3, Jmjd1c,	::O112::O235::
chr19:32872350-32881350	2	0.0414219	3	9.38069e-05	Pten,	::O315::O74::
chr18:61265250-61274250	2	0.0414219	3	9.38069e-05	Csf1r, Hmgxb3,	::O380::O73::
chr15:66714450-66723450	2	0.0414219	3	9.38069e-05	Wisp1,	::O245::O417::
chr15:61815450-61824450	2	0.0414219	3	9.38069e-05	Myc,	::O235::O374-1::
chr1:154920750-154929750	2	0.0414219	3	9.38069e-05	Nmnat2,	::O112::O31::
chr10:8470950-8479950	2	0.0414219	3	9.38069e-05	Sash1,	::O417::O315::
chrX:139419750-139428750	3	9.38069e-05	3	9.38069e-05	Ammecr1,	::O245::O31::O112::
chr7:120529350-120538350	2	0.0414219	2	0.0414219	Pth, Btbd10,	::O109::O74::
chr7:17180250-17189250	2	0.0414219	2	0.0414219	Grlf1,	::O245::O31::
chr4:138812250-138821250	2	0.0414219	2	0.0414219	Capzb,	::O165::O315::
chr4:53156550-53165550	2	0.0414219	2	0.0414219	Abca1,	::O109::O167::
chr18:32100450-32109450	2	0.0414219	2	0.0414219	Lims2, Gpr17, Myo7b,	::O82::O73::
chr17:81120450-81129450	2	0.0414219	2	0.0414219	AC169501.1, Map4k3,	::O315::O165::
chr15:59423250-59432250	2	0.0414219	2	0.0414219	Nsmce2,	::O167::O380::
chr10:19640850-19649850	2	0.0414219	2	0.0414219	Map3k5, Pex7,	::O73::O74::
chr10:70421550-70430550	2	0.0414219	2	0.0414219	Bicc1,	::O235::O245::
chr11:4718250-4727250	3	9.38069e-05	2	0.0414219	Nf2,	::O380::O417::O165::
chr12:113897550-113906550	2	0.0414219	2	0.0414219	Akt1, Siva1, Zbtb42, Adssl1,	::O315::O31::
chr2:124479150-124488150	2	0.0414219	2	0.0414219	Sema6d,	::O112::O167::

## Sheet: S7-RCISvsDCIS
Supplementary Table 7
DCIS		RCIS
Kdm6a		Abca1,
Abca1,		Akt1
Ammecr1		Ammecr1,
Cd2ap		Bicc1,
Cdkn2a		Capzb,
Dennd4a,		Cd2ap
Eras		Cdkn2a
Gab1		Cdkn2a
Gigyf2		Cnot7
Grb2		Csf1r
Heatr3		Eras
Hiat1, Slc35a3,		Fgfr2
Hsn2		Grlf1,
Ino80,		Gtf2i,
Irf1		Heatr3
Itpripl2, AC122912.1, Coq7,		Ints8
Lims2		Lims2
Mef2a		Map3k5
Mtdh		Map4k3,
Mycl1		Myc,
Nf2		Mycl1
Nktr		Nf2,
No results within 20000 bp window		Nmnat2,
Panx3		Nsmce2,
Poln		Pten
Ppp6c		Pth
Pten,		Reep3, Jmjd1c,
Rab14, Cep110,		Rere
Rere		Sash1,
Sema4d		Sema6d
Sema6d,		Wisp1,
Tmtc2
Ube2r2,		Bold genes
Usp34		found in both lists
Zmiz1

## Sheet: S8-STATS
Supplemental Table 8
GENE	group1	group2	P-val	group1ave	group2ave	fold change
Eras	185.448 559.493 791.534	0.0874749 0.0154629 0.131165 1.36431 0.0334197 0.454362 0.059397 0 0 0.141689 0	3.972e-05	512.158	0.207935	2463.07
Myc	137.766 429.001	8.18041 50.5648 27.6955 19.5562 22.2258 21.5371 19.8491 46.4446 38.6823 24.6666 43.3071 111.466	0.000312	283.384	36.1813	7.83232
Mycl1	443.527 75.6357	0.592474 0.988598 8.35844 0.726372 0.653213 0.301083 0.755111 0.429121 18.2201 0.83961 0.890141 0.207212	0.0007689	259.581	2.74679	94.5035
Hdac6	14.7226 42.1786 19.8756	7.07334 8.2557 7.35265 6.6593 5.68975 9.06613 6.71403 6.82149 14.0366 7.82654 10.1385	0.001153	25.5923	8.14855	3.14072
Ammecr1	2.01565 1.63546 1.48222	6.59939 1.00177 4.68259 9.17669 5.22423 7.59889 8.18577 7.89084 6.25163 9.26807 8.00236	0.004402	1.71111	6.71657	0.25476
Pth	5.76308 170.762	0 0 0.0223801 0 0 0 0 0 0 0 0 0	0.004976	88.2625	0.00186501	47325.6
Sema6d	34.5363 15.881	7.75328 10.0847 7.89248 5.237 6.64813 10.2153 10.8399 16.5932 19.4856 4.62655 12.041 13.9399	0.005706	25.2086	10.4464	2.41314
Jmjd1c	18.7274 12.4237	12.8298 6.32751 7.51644 4.32221 10.3239 8.78579 7.11526 10.7025 11.1765 10.2801 8.53647 6.15271	0.005794	15.5755	8.67243	1.79598
Cnot7	115.025 24.4049	28.2816 21.6668 16.6586 13.3383 25.6267 18.7823 18.9965 30.2068 13.8386 24.6595 20.1122 16.0255	0.00592	69.715	20.6828	3.37068
Nsmce2	483.675 40.9972	14.4179 33.1958 23.1554 25.8185 19.0608 20.774 30.9761 25.3382 36.5442 15.3489 18.5903 79.4713	0.005989	262.336	28.5576	9.1862
Heatr3	104.716 17.5861	16.2022 9.86569 9.58987 8.94483 17.4501 8.59552 18.763 15.4827 14.9771 16.416 18.1685 21.8551	0.00602	61.151	14.6926	4.16204
Abca1	15.4738 30.7845	4.73051 17.4531 6.22778 8.10359 7.09592 20.1063 7.69864 4.40338 0 0 0.0361472 0.0119829	0.009086	23.1291	6.32228	3.65836
Lims2	285.528 9.95585	7.49096 7.88905 60.3315 8.11882 8.53965 2.76723 2.54291 7.83773 3.40684 3.04357 7.1713 6.90761	0.009469	147.742	10.5039	14.0654
Dpy19l4	0.891011 1.07639 1.05071	5.51242 0.928507 8.54559 5.46136 3.16874 3.84732 4.18961 6.35503 4.12501 5.96244 3.23295	0.009855	1.00604	4.66627	0.215598
Pex7	8.75598 14.3585	6.70391 6.40206 8.0986 7.45872 7.23051 10.3295 5.72853 7.71717 7.31437 9.93366 7.1259 7.26205	0.01067	11.5572	7.60875	1.51894
Nmnat2	0.616585 9.19073	0.672511 1.61242 0.793758 1.52221 1.64271 0.0586441 0.503253 2.96102 0.490329 0.243823 0.678949 0.474112	0.01988	4.90366	0.971145	5.04936
Myo7b	0.125879 0	0 0.00420945 0.0393144 0 0.0198038 0.00461987 0 0 0 0 0.00611852 0	0.0214	0.0629395	0.00617217	10.1973
Cdkn2a	5.68775 1862.79	155.184 97.1638 47.6172 98.2106 290.511 292.871 54.2895 78.8921 41.7203 349.879 161.14 121.517	0.02238	934.239	149.083	6.26657
Pcsk1n	0.303004 5.28814 1.59444	0.0795362 2.39604 0.0114898 0.629955 0.0295527 0 0 0 0.0194717 0.0312864 0.0622503	0.02365	2.39519	0.296326	8.08298
Sash1	11.5496 70.8173	10.7693 17.7065 7.96911 14.4569 8.51803 37.9012 13.1367 23.2215 14.1811 13.3483 14.289 12.5103	0.03828	41.1835	15.6673	2.62862
Cdkn2b	11.8544 64.1456	4.39663 11.2593 10.737 10.5094 28.6119 35.9796 4.42319 17.218 4.05288 3.778 19.1455 10.1759	0.04619	38	13.3573	2.84489
Ints8	15.5802 47.8316 7.00085	10.5016 7.97284 10.55 14.2011 5.40255 11.7144 9.8271 12.8911 10.8638 13.8677 10.9405	0.05347	23.4709	10.7939	2.17446
Nf2	14.6325 12.1277 13.9895	15.0095 18.079 15.1286 15.3382 25.0393 21.7978 14.0707 24.1229 20.6625 25.4601 30.3095	0.05384	13.5832	20.4562	0.664016
Siva1	28.1175 17.5649	62.0213 15.6066 49.9145 42.7217 38.7184 58.3258 53.6282 43.2859 51.22 51.2617 24.3945 36.3447	0.05848	22.8412	43.9536	0.519666
Bicc1	24.8035 69.9514	4.92444 30.4321 7.29618 5.92188 41.5032 18.5588 25.1601 25.7902 45.6146 25.983 24.3215 18.7065	0.05939	47.3775	22.851	2.07332
Cdkn2a	98.2106 5.68775 1862.79	155.184 97.1638 47.6172 290.511 292.871 54.2895 78.8921 41.7203 349.879 161.14 121.517	0.1046	655.563	153.708	4.265
Zbtb42	2.87351 1.87894	1.27498 1.14217 1.29051 1.87422 2.72614 1.95911 2.29303 1.68633 1.75531 1.31979 1.58057 2.0456	0.1196	2.37622	1.74565	1.36123
Gtf2i	37.5901 38.6216	56.5338 67.8272 47.6737 52.9386 33.0368 52.5552 71.0941 29.2623 54.207 75.1966 60.3896 76.3579	0.1228	38.1058	56.4227	0.675363
Grlf1	8.74778 5.56654	8.55785 8.64 7.34872 14.7504 12.9927 12.1844 8.51978 19.0975 10.6888 14.3149 9.60228 9.89014	0.1232	7.15716	11.3823	0.628798
Rere	6.00145 11.6159	17.3924 15.194 13.5079 25.4204 12.3286 26.418 14.2094 17.2317 17.9302 54.3783 22.5806 21.4879	0.1532	8.80867	21.5066	0.40958
Btbd10	5.17128 5.44938	5.53205 6.46373 5.25421 7.04217 11.9422 8.21257 5.99299 9.41892 7.53387 8.14334 10.3749 5.25219	0.1684	5.31033	7.59693	0.69901
Map4k3	32.7369 33.0718	9.18751 13.6115 17.9371 19.5305 19.3237 33.2357 32.3065 27.5869 11.5437 14.5603 27.5579 45.3416	0.215	32.9044	22.6436	1.45314
Capzb	56.0543 265.964	190.153 419.626 223.484 211.136 168.977 269.499 244.161 204.22 202.667 236.295 190.784 215.487	0.2466	161.009	231.374	0.695883
Fgfr2	16.5911 85.9555	13.3751 51.5405 17.7471 44.6752 67.1444 5.25353 49.9571 24.4967 2.45493 21.2413 32.5083 21.7985	0.2523	51.2733	29.3494	1.747
Vps37a	3.50826 3.11077	2.89859 6.32213 3.2426 4.54883 6.2358 2.38786 3.13643 5.57747 3.7777 4.77111 6.46067 4.15261	0.294	3.30952	4.45932	0.742157
Akt1	203.935 99.2439	134.548 76.9939 145.427 97.6791 116.618 179.929 146.907 101.34 132.033 93.7794 98.2079 173.798	0.3732	151.589	124.772	1.21493
Zdhhc2	1.17528 0.2692	0.132779 2.25876 0.286859 0.256431 0.457198 0.624125 0.43282 0.50309 16.2308 22.7414 16.1267 19.5607	0.3895	0.72224	6.63431	0.108864
Timm17b	15.4062 27.0345 25.7358	25.6828 11.8983 21.1968 28.8015 21.5909 14.5772 24.3681 16.5495 17.1364 15.7337 20.4731	0.423	22.7255	19.8189	1.14666
Gpr17	1.53985 0.111968	0.0422279 2.77585 0.247114 0.111579 0.0456391 0.0768488 0.00752685 0.198918 0.0367557 0.12871 0.117361 0.150114	0.4291	0.825909	0.32822	2.51632
Cd2ap	42.7442 20.8103	17.3349 50.3323 20.2489 18.4577 8.85552 27.328 27.4745 11.2992 29.8679 30.9558 20.4724 36.1319	0.4598	31.7772	24.8966	1.27637
Csf1r	21.0238 147.006	64.6817 86.3276 128.814 119.607 155.668 112.3 35.2536 199.702 164.69 136.226 36.4884 137.78	0.4778	84.0149	114.795	0.73187
Hmgxb3	8.3166 10.883	11.5787 8.22934 8.20415 5.79913 6.95707 8.6843 10.6459 7.83624 8.11092 9.26732 10.7574 8.07064	0.483	9.5998	8.67843	1.10617
Map3k5	4.70973 4.63395	2.87013 5.65624 2.69482 5.97257 3.35362 1.33167 2.94635 3.38274 6.44831 3.58896 5.59312 2.61972	0.5134	4.67184	3.87152	1.20672
Pten	24.9516 11.0583	6.54947 26.7865 15.9287 30.6051 21.5228 23.0192 28.4974 19.3198 43.1307 13.5336 18.6788 25.6636	0.5185	18.005	22.7696	0.790744
Trit1	11.9949 4.86113	5.11 6.57955 9.54537 7.95594 4.46607 6.32569 4.68517 6.11068 5.87983 13.3913 9.15499 8.34081	0.6117	8.42802	7.29545	1.15524
Adssl1	26.7798 21.3035	8.02306 7.36718 21.5086 39.3417 28.2563 51.4423 26.7637 22.6394 2.2978 51.348 54.4766 12.9761	0.818	24.0417	27.2034	0.883774
Reep3	11.6454 25.0682	30.1131 15.4232 16.0145 10.8146 23.6032 21.4355 20.8527 22.2636 23.1328 13.7483 17.3496 15.0041	0.862	18.3568	19.1463	0.958766
Wisp1	43.7431 53.6879	26.8246 86.5797 62.4556 34.5362 111.275 16.0856 36.5382 3.48895 111.538 13.7219 61.2786 28.6617	0.9799	48.7155	49.4153	0.985838

## Sheet: S9-PRIMERS
Supplemental Table 9
Name	Sequence 5'->3'	Tumor	CPM
Splice Donor For	CCGCGAGGATCTCTCAG
Myc Ex2 Rev	CAGCTCGAATTTCTTCCAGA	O374-1	29.5
Bicc1 Ex5 Rev	TGTGCGAGACATCCATCTT	O235	0.66
Fars2 Ex4 Rev	ATGTCCGACAGGAGGAACTG	O31	4.48
Smad5 5' Region Rev	TGCCAACTTGAAAATCAGAGTC	O31	0.72
Gsk3b Ex11 Rev	AGTTGGAAGCTGATGCAGAA	O73	4.34
Runx1 Ex2 Rev	GGTCGTTGAATCTCGCTACC	O245	0.49
Tax1bp1 Ex13 Rev	GTTCAAGTTTTACATTTTCAGCA	O245	1.62
